# Supplementary material for: Molecular analysis of the 14-3-3 genes in Panax ginseng and their responses to heat stress
Source: PeerJ. 2023 May 9;11:e15331. doi: 10.7717/peerj.15331 (PMC10178371; doi:10.7717/peerj.15331)
Supplement: Supplemental Information 1 [file peerj-11-15331-s001.xlsx]

## Sheet: Sheet1
Sequences of primers for quantitative real-time PCR
Gene Name	Gene ID	Forward primer sequence(5'- 3')	Reverse primer sequence(5'- 3')
PgGF14-1	Pg_S0049.6	GAGCAAGCGGAGCGGTATGAAG	AGGCCACGGAGAGGAGGTTTC
PgGF14-2	Pg_S0382.5	CTGAAGCTGTTGGAGTCGAATCTGG	ACCGCCTCCTTCCGCTCATC
PgGF14-3	Pg_S0778.7	GAGCAAGCGGAGCGGTATGAAG	TCGTCCACAGAGAGGAGGTTTCG
PgGF14-4	Pg_S2850.2	CCTGAGTGCCATACCTTGCTGAAG	CGAGCAGATCACGGGCATTCAC
PgGF14-5	Pg_S1006.2	GGGGTTGGAGGAATATGAGCAGTG	TTTGATGGGTTGGAAAGGCTCTGAG
PgGF14-6	Pg_S0105.3	GGAGTCGAATCTCGTGTCGTTGG	ATAGTATCCTCAGCAGCCTCCTTCC
PgGF14-7	Pg_S1029.36	CCGAACAAGCCGAGCGATACG	TTCTTGTAGGCGACGGAGAGGAG
PgGF14-8	Pg_S8664.5	CCGAACAAGCCGAGCGATACG	GTAGGCGACGGAGAGGAGGTTAC
PgGF14-9	Pg_S2461.5	CGCTACGAGGAAATGGTGGAGTTC	AGGCGACAGAGAGGAGGTTGC
PgGF14-10	Pg_S0604.6	CGCTACGAGGAAATGGTGGAGTTC	AGGCGACAGAGAGGAGGTTGC
PgGF14-11	Pg_S0207.2	GAGCAAGCCGAGCGATACGAAG	ATTCCGTTCCTCCACCGTCAATTC
PgGF14-12	Pg_S2535.1	GAGTCGAATCTGGTGCCGTTGG	ATAGTATCCTCAGCAGCCTCCTTCC
PgGF14-13	Pg_S0146.2	CTTTGATGCAACAGACCCAGAGGAG	CCATTTCTGCTACACTCGGATGCTC
PgGF14-14	Pg_S2827.2	GAATCTAGTGTCGTCGGCTTCCATG	ACAGCCTCCTTCCGCTCATCTC
PgGF14-15	Pg_S4893.15	GGTGATGGGTGGCACGGTAAAC	ATAGTATCCTCAGCAGCCTCCTTCC
PgGF14-16	Pg_S2001.1	CGGCTTCCACGAGTGAGTCAAAG	CATAGTTTCCTCAGCAGCCTCCTTC
PgGF14-17	Pg_S2151.5	TCGGCTTCCACGAGCGAGTC	AGTATCCTCAGCAGCCTCCTTCTG
PgGF14-18	Pg_S2020.18	AAGAATGTCATTGGTGCCCGAAGAG	TCATCCTCTACCTTCTGGCGATAGC
PgGF14-19	Pg_S1750.41	CGACTTGGACTGGCTCTCAACTTC	TCCTTGTACGAATCCTCTCCGAGTG
PgGF14-20	Pg_S2708.12	AAGGCAGCCCAGGATATAGCAAATG	AGCAAGGTTACAAGCACGATCAGG
PgGF14-21	Pg_S2390.8	AAGGCAGCCCAGGATATAGCAAATG	AGCAAGGTTACAAGCACGATCAGG
PgGF14-22	Pg_S2162.22	AAGAATGTCATTGGTGCCCGAAGAG	TCATCCTCTACCTTCTGGCGATAGC
PgGF14-23	Pg_S2402.1	CTAGTTGGCGACCTCTTGGATGTG	CCCTACTTCTGCGTTGGATGATGC
PgGF14-24	Pg_S1693.13	GTGGTGCCGGTGAATCCATAGTG	GCAACATCCTTCCTATCGCTACCAG
PgGF14-25	Pg_S1497.31	GAAGAGAGCCGTGGGAATGAAGATC	GACGATGCCGAGGGAACAAGATG
PgGF14-26	Pg_S8682.2	TTGAAAGGCTATGAGGCTGCTTCTG	TTGAGAGCAAGACCAAGACGGATTG
PgGF14-27	Pg_S0909.4	GCTTCCACGAGCGAGTCAAAGG	ATAGTATCCTCAGCAGCCTCCTTCC
PgGF14-28	Pg_S1794.8	GCCGAGCGTTACGAAGAGATGG	AGGCGACGGAGAGGAGGTTTC
PgGF14-29	Pg_S0061.54	TTGAAAGGCTATGAGGCTGCTTCTG	TTGAGAGCAAGACCAAGACGGATTG
PgGF14-30	Pg_S5218.7	CAGAAGGAAGAGAGCCGTGGAAATG	GATGACGCCGAGGGAACAAGATG
PgGF14-31	Pg_S3744.4	ACAGGCAGAAAGTGGAATCAGAGC	CCAGCAGAGCACGAAGGAATGAG
PgGF14-32	Pg_S1055.45	GAGCAGAAGGAGGAGTCGAGAGG	TCCAGCAGTGCATGAAGGAATGAG
PgGF14-33	Pg_S2588.15	CGGATCAAGGAGTACAGGCAGAAAG	CCAGCAGAGCACGAAGGAATGAG
PgGF14-34	Pg_S5121.3	CAGAAGGAAGAGAGCCGTGGAAATG	GATGACGCCGAGGGAACAAGATG
PgGF14-35	Pg_S3628.13	GAGCAGAAGGAGGAGTCGAGAGG	TCCAGCAGTGCATGAAGGAATGAG
PgGF14-36	Pg_S6072.5	GAACCTCCTCTCCGTCGCCTAC	ACCCTCCTCCTTCTGCTCAATCG
PgGF14-37	Pg_S4884.1	GCAGAGCAAGCCGAGCGATAC	CGTTCTTGTAAGCCACCGAGAGTAG
PgGF14-38	Pg_S0399.53	CCGCCTCTTCTTCCGTAGTTTCTTC	ATGGCTCATTTGCTTTGGTTGTCAC
PgGF14-39	Pg_S4151.1	GAACCTCCTCTCCGTCGCCTAC	ACCCTCCTCCTTCTGCTCAATCG
PgGF14-40	Pg_S3563.1	GCCGAGCGTTACGAAGAGATGG	AGGCGACGGAGAGGAGGTTTC
PgGF14-41	Pg_S1590.20	TGAACGCTATGACGAAATGGTGGAG	ACAATATCCGCCAAGATGCTCTACG
PgGF14-42	Pg_S2148.5	TGAACGCTATGACGAAATGGTGGAG	ACAATATCCGCCAAGATGCTCTACG
β-Actin	β-Actin	GGCATCACACTTTCTACAACG	GGCAGGAACATTAAAGGTTTC
