# Supplementary material for: Molecular analysis of the 14-3-3 genes in Panax ginseng and their responses to heat stress
Source: PeerJ. 2023 May 9;11:e15331. doi: 10.7717/peerj.15331 (PMC10178371; doi:10.7717/peerj.15331)
Supplement: Supplemental Information 2 [file peerj-11-15331-s002.xlsx]

## Sheet: Sheet1
Physicochemical properties and subcellular localization of PgGF14s
Gene Name	Gene ID	pI	Instability Index(II)	GRAVY	Subcellular Localization	Transmembrane Domain(TM)	Signal Peptides
PgGF14-1	Pg_S0049.6	5.77	44.34	-0.277	Cytoplasmic	OUTSIDE	NO
PgGF14-2	Pg_S0382.5	6.74	62.67	-0.438	Nuclear	INSIDE	NO
PgGF14-3	Pg_S0778.7	5.04	33.05	-0.046	Cytoplasmic	ONE	NO
PgGF14-4	Pg_S2850.2	5.69	36.94	-0.394	Nuclear	OUTSIDE	NO
PgGF14-5	Pg_S1006.2	8.49	55.45	-0.303	Mitochondrial	OUTSIDE	NO
PgGF14-6	Pg_S0105.3	6.59	50.48	-0.602	Nuclear	OUTSIDE	NO
PgGF14-7	Pg_S1029.36	4.67	42.37	-0.45	Cytoplasmic	OUTSIDE	NO
PgGF14-8	Pg_S8664.5	4.67	41.62	-0.44	Cytoplasmic	OUTSIDE	NO
PgGF14-9	Pg_S2461.5	4.69	38.46	-0.467	Cytoplasmic	OUTSIDE	NO
PgGF14-10	Pg_S0604.6	4.69	37.42	-0.455	Cytoplasmic	OUTSIDE	NO
PgGF14-11	Pg_S0207.2	4.65	48.12	-0.451	Cytoplasmic	OUTSIDE	NO
PgGF14-12	Pg_S2535.1	6.83	28.06	-0.629	Cytoplasmic	OUTSIDE	NO
PgGF14-13	Pg_S0146.2	5.36	35.67	-0.658	Cytoplasmic	OUTSIDE	NO
PgGF14-14	Pg_S2827.2	4.85	65.95	-0.603	Nuclear	OUTSIDE	NO
PgGF14-15	Pg_S4893.15	8.73	43.65	-0.718	Mitochondrial	OUTSIDE	NO
PgGF14-16	Pg_S2001.1	5.06	45.16	-0.613	Nuclear	OUTSIDE	NO
PgGF14-17	Pg_S2151.5	5.35	48.11	-0.646	Nuclear	OUTSIDE	NO
PgGF14-18	Pg_S2020.18	4.83	50.41	-0.623	Cytoplasmic	OUTSIDE	NO
PgGF14-19	Pg_S1750.41	4.66	47.66	-0.553	Cytoplasmic	OUTSIDE	NO
PgGF14-20	Pg_S2708.12	4.73	38.21	-0.507	Cytoplasmic	OUTSIDE	NO
PgGF14-21	Pg_S2390.8	4.82	38.06	-0.508	Cytoplasmic	OUTSIDE	NO
PgGF14-22	Pg_S2162.22	4.83	50.41	-0.623	Cytoplasmic	OUTSIDE	NO
PgGF14-23	Pg_S2402.1	4.63	46.66	-0.073	Cytoplasmic	OUTSIDE	NO
PgGF14-24	Pg_S1693.13	6.81	29.2	-0.193	Nuclear	OUTSIDE	NO
PgGF14-25	Pg_S1497.31	4.74	48.92	-0.44	Cytoplasmic	OUTSIDE	NO
PgGF14-26	Pg_S8682.2	4.93	50.34	-0.649	Cytoplasmic	OUTSIDE	NO
PgGF14-27	Pg_S0909.4	6.45	33.08	-0.052	PlasmaMembrane	OUTSIDE	NO
PgGF14-28	Pg_S1794.8	4.7	45.85	-0.323	Cytoplasmic	OUTSIDE	NO
PgGF14-29	Pg_S0061.54	4.89	49.15	-0.551	Cytoplasmic	OUTSIDE	NO
PgGF14-30	Pg_S5218.7	4.9	47.89	-0.389	Cytoplasmic	OUTSIDE	NO
PgGF14-31	Pg_S3744.4	4.79	48.44	-0.551	Cytoplasmic	OUTSIDE	NO
PgGF14-32	Pg_S1055.45	5.31	49.27	-0.231	Cytoplasmic	OUTSIDE	NO
PgGF14-33	Pg_S2588.15	4.79	48.62	-0.56	Nuclear	OUTSIDE	NO
PgGF14-34	Pg_S5121.3	4.72	48.22	-0.404	Cytoplasmic	OUTSIDE	NO
PgGF14-35	Pg_S3628.13	4.82	50.8	-0.571	Nuclear	OUTSIDE	NO
PgGF14-36	Pg_S6072.5	4.86	44.18	-0.307	Cytoplasmic	OUTSIDE	NO
PgGF14-37	Pg_S4884.1	4.64	49.24	-0.583	Cytoplasmic	OUTSIDE	NO
PgGF14-38	Pg_S0399.53	6.61	40.17	-0.064	Cytoplasmic	OUTSIDE	NO
PgGF14-39	Pg_S4151.1	5.48	36.27	-0.338	Cytoplasmic	OUTSIDE	NO
PgGF14-40	Pg_S3563.1	4.7	42.24	-0.319	Cytoplasmic	OUTSIDE	NO
PgGF14-41	Pg_S1590.20	4.85	36.72	-0.349	Cytoplasmic	OUTSIDE	NO
PgGF14-42	Pg_S2148.5	5.26	36.69	-0.339	Cytoplasmic	OUTSIDE	NO
