# Supplementary material for: Molecular analysis of the 14-3-3 genes in Panax ginseng and their responses to heat stress
Source: PeerJ. 2023 May 9;11:e15331. doi: 10.7717/peerj.15331 (PMC10178371; doi:10.7717/peerj.15331)
Supplement: Supplemental Information 3 — The locations of upstream promoter elements of PgGF14s and outlines their primary functions and the motifs they contain. [file peerj-11-15331-s003.xlsx]

## Sheet: Sheet1
Details of the types and functions to PgGF14s cis-acting elements.
Gene name	Loucs-start	Loucs-end	Function for elements	Action elements
PgGF14-1	1090	1140	abscisic acid responsiveness	ABRE
PgGF14-1	799	849	abscisic acid responsiveness	ABRE
PgGF14-11	1482	1532	abscisic acid responsiveness	ABRE
PgGF14-12	532	582	abscisic acid responsiveness	ABRE
PgGF14-13	1473	1523	abscisic acid responsiveness	ABRE
PgGF14-14	996	1046	abscisic acid responsiveness	ABRE
PgGF14-15	1908	1958	abscisic acid responsiveness	ABRE
PgGF14-15	1856	1906	abscisic acid responsiveness	ABRE
PgGF14-15	1603	1653	abscisic acid responsiveness	ABRE
PgGF14-15	688	738	abscisic acid responsiveness	ABRE
PgGF14-15	554	604	abscisic acid responsiveness	ABRE
PgGF14-16	830	880	abscisic acid responsiveness	ABRE
PgGF14-18	254	304	abscisic acid responsiveness	ABRE
PgGF14-2	876	926	abscisic acid responsiveness	ABRE
PgGF14-2	511	561	abscisic acid responsiveness	ABRE
PgGF14-20	37	87	abscisic acid responsiveness	ABRE
PgGF14-21	627	677	abscisic acid responsiveness	ABRE
PgGF14-23	1441	1491	abscisic acid responsiveness	ABRE
PgGF14-23	1298	1348	abscisic acid responsiveness	ABRE
PgGF14-23	905	955	abscisic acid responsiveness	ABRE
PgGF14-24	1888	1938	abscisic acid responsiveness	ABRE
PgGF14-26	1230	1280	abscisic acid responsiveness	ABRE
PgGF14-26	584	634	abscisic acid responsiveness	ABRE
PgGF14-28	1487	1537	abscisic acid responsiveness	ABRE
PgGF14-29	1527	1577	abscisic acid responsiveness	ABRE
PgGF14-29	1376	1426	abscisic acid responsiveness	ABRE
PgGF14-29	920	970	abscisic acid responsiveness	ABRE
PgGF14-29	651	701	abscisic acid responsiveness	ABRE
PgGF14-29	350	400	abscisic acid responsiveness	ABRE
PgGF14-3	1210	1260	abscisic acid responsiveness	ABRE
PgGF14-3	908	958	abscisic acid responsiveness	ABRE
PgGF14-32	1795	1845	abscisic acid responsiveness	ABRE
PgGF14-33	439	489	abscisic acid responsiveness	ABRE
PgGF14-34	871	921	abscisic acid responsiveness	ABRE
PgGF14-34	438	488	abscisic acid responsiveness	ABRE
PgGF14-35	1827	1877	abscisic acid responsiveness	ABRE
PgGF14-35	887	937	abscisic acid responsiveness	ABRE
PgGF14-35	88	138	abscisic acid responsiveness	ABRE
PgGF14-36	1743	1793	abscisic acid responsiveness	ABRE
PgGF14-36	1171	1221	abscisic acid responsiveness	ABRE
PgGF14-36	521	571	abscisic acid responsiveness	ABRE
PgGF14-37	856	906	abscisic acid responsiveness	ABRE
PgGF14-38	1683	1733	abscisic acid responsiveness	ABRE
PgGF14-38	1228	1278	abscisic acid responsiveness	ABRE
PgGF14-38	431	481	abscisic acid responsiveness	ABRE
PgGF14-39	1731	1781	abscisic acid responsiveness	ABRE
PgGF14-39	233	283	abscisic acid responsiveness	ABRE
PgGF14-4	838	888	abscisic acid responsiveness	ABRE
PgGF14-41	1861	1911	abscisic acid responsiveness	ABRE
PgGF14-42	1863	1913	abscisic acid responsiveness	ABRE
PgGF14-42	1651	1701	abscisic acid responsiveness	ABRE
PgGF14-42	701	751	abscisic acid responsiveness	ABRE
PgGF14-42	326	376	abscisic acid responsiveness	ABRE
PgGF14-5	838	888	abscisic acid responsiveness	ABRE
PgGF14-1	1837	1887	anaerobic induction	ARE
PgGF14-1	1313	1363	anaerobic induction	ARE
PgGF14-1	903	953	anaerobic induction	ARE
PgGF14-11	1720	1770	anaerobic induction	ARE
PgGF14-12	1497	1547	anaerobic induction	ARE
PgGF14-12	746	796	anaerobic induction	ARE
PgGF14-13	1732	1782	anaerobic induction	ARE
PgGF14-13	1622	1672	anaerobic induction	ARE
PgGF14-13	1292	1342	anaerobic induction	ARE
PgGF14-13	266	316	anaerobic induction	ARE
PgGF14-14	1913	1963	anaerobic induction	ARE
PgGF14-14	1633	1683	anaerobic induction	ARE
PgGF14-16	1899	1949	anaerobic induction	ARE
PgGF14-16	1604	1654	anaerobic induction	ARE
PgGF14-16	1042	1092	anaerobic induction	ARE
PgGF14-16	302	352	anaerobic induction	ARE
PgGF14-17	1911	1961	anaerobic induction	ARE
PgGF14-17	1533	1583	anaerobic induction	ARE
PgGF14-17	214	264	anaerobic induction	ARE
PgGF14-18	1562	1612	anaerobic induction	ARE
PgGF14-18	1015	1065	anaerobic induction	ARE
PgGF14-18	342	392	anaerobic induction	ARE
PgGF14-19	727	777	anaerobic induction	ARE
PgGF14-19	351	401	anaerobic induction	ARE
PgGF14-2	1922	1972	anaerobic induction	ARE
PgGF14-20	1918	1968	anaerobic induction	ARE
PgGF14-21	1918	1968	anaerobic induction	ARE
PgGF14-21	929	979	anaerobic induction	ARE
PgGF14-22	1523	1573	anaerobic induction	ARE
PgGF14-22	461	511	anaerobic induction	ARE
PgGF14-25	618	668	anaerobic induction	ARE
PgGF14-26	1344	1394	anaerobic induction	ARE
PgGF14-27	1909	1959	anaerobic induction	ARE
PgGF14-27	714	764	anaerobic induction	ARE
PgGF14-28	63	113	anaerobic induction	ARE
PgGF14-3	1915	1965	anaerobic induction	ARE
PgGF14-30	1357	1407	anaerobic induction	ARE
PgGF14-31	1787	1837	anaerobic induction	ARE
PgGF14-32	113	163	anaerobic induction	ARE
PgGF14-33	1691	1741	anaerobic induction	ARE
PgGF14-33	524	574	anaerobic induction	ARE
PgGF14-33	77	127	anaerobic induction	ARE
PgGF14-34	1655	1705	anaerobic induction	ARE
PgGF14-34	1484	1534	anaerobic induction	ARE
PgGF14-35	1103	1153	anaerobic induction	ARE
PgGF14-35	494	544	anaerobic induction	ARE
PgGF14-36	62	112	anaerobic induction	ARE
PgGF14-37	152	202	anaerobic induction	ARE
PgGF14-39	1116	1166	anaerobic induction	ARE
PgGF14-4	224	274	anaerobic induction	ARE
PgGF14-40	1540	1590	anaerobic induction	ARE
PgGF14-42	1390	1440	anaerobic induction	ARE
PgGF14-42	805	855	anaerobic induction	ARE
PgGF14-5	1910	1960	anaerobic induction	ARE
PgGF14-5	1586	1636	anaerobic induction	ARE
PgGF14-5	951	1001	anaerobic induction	ARE
PgGF14-6	1912	1962	anaerobic induction	ARE
PgGF14-6	1501	1551	anaerobic induction	ARE
PgGF14-14	85	135	ATBP-1	AT-rich element
PgGF14-16	1218	1268	ATBP-1	AT-rich element
PgGF14-19	1249	1299	ATBP-1	AT-rich element
PgGF14-19	1077	1127	ATBP-1	AT-rich element
PgGF14-21	1104	1154	ATBP-1	AT-rich element
PgGF14-30	434	484	ATBP-1	AT-rich element
PgGF14-37	1378	1428	ATBP-1	AT-rich element
PgGF14-38	1468	1518	ATBP-1	AT-rich element
PgGF14-39	702	752	ATBP-1	AT-rich element
PgGF14-41	1343	1393	ATBP-1	AT-rich element
PgGF14-42	1751	1801	ATBP-1	AT-rich element
PgGF14-1	1538	1588	auxin-responsive element	TGA-element
PgGF14-1	703	753	auxin-responsive element	TGA-element
PgGF14-1	219	269	auxin-responsive element	TGA-element
PgGF14-11	773	823	auxin-responsive element	TGA-element
PgGF14-12	1587	1637	auxin-responsive element	TGA-element
PgGF14-13	697	747	auxin-responsive element	TGA-element
PgGF14-13	360	410	auxin-responsive element	TGA-element
PgGF14-16	1508	1558	auxin-responsive element	TGA-element
PgGF14-2	671	721	auxin-responsive element	TGA-element
PgGF14-2	1569	1619	auxin-responsive element	TGA-element
PgGF14-23	1616	1666	auxin-responsive element	TGA-element
PgGF14-23	229	279	auxin-responsive element	TGA-element
PgGF14-26	1474	1524	auxin-responsive element	TGA-element
PgGF14-27	1150	1200	auxin-responsive element	TGA-element
PgGF14-28	1810	1860	auxin-responsive element	TGA-element
PgGF14-28	1017	1067	auxin-responsive element	TGA-element
PgGF14-29	796	846	auxin-responsive element	TGA-element
PgGF14-29	117	167	auxin-responsive element	TGA-element
PgGF14-3	1677	1727	auxin-responsive element	TGA-element
PgGF14-31	817	867	auxin-responsive element	TGA-element
PgGF14-36	1916	1966	auxin-responsive element	TGA-element
PgGF14-37	1100	1150	auxin-responsive element	TGA-element
PgGF14-40	501	551	auxin-responsive element	TGA-element
PgGF14-40	722	772	auxin-responsive element	TGA-element
PgGF14-41	100	150	auxin-responsive element	TGA-element
PgGF14-42	902	952	auxin-responsive element	TGA-element
PgGF14-7	1464	1514	auxin-responsive element	TGA-element
PgGF14-7	1272	1322	auxin-responsive element	TGA-element
PgGF14-18	1679	1729	cell cycle regulation	MSA-like
PgGF14-22	1740	1790	cell cycle regulation	MSA-like
PgGF14-26	1741	1791	cell cycle regulation	MSA-like
PgGF14-29	1646	1696	cell cycle regulation	MSA-like
PgGF14-31	493	543	cell cycle regulation	MSA-like
PgGF14-1	1615	1665	circadian control	circadian
PgGF14-17	103	153	circadian control	circadian
PgGF14-19	574	624	circadian control	circadian
PgGF14-2	1657	1707	circadian control	circadian
PgGF14-23	1714	1764	circadian control	circadian
PgGF14-3	1763	1813	circadian control	circadian
PgGF14-36	614	664	circadian control	circadian
PgGF14-38	1325	1375	circadian control	circadian
PgGF14-7	109	159	circadian control	circadian
PgGF14-1	501	551	defense and stress responsiveness	TC-rich repeats
PgGF14-15	804	854	defense and stress responsiveness	TC-rich repeats
PgGF14-16	200	250	defense and stress responsiveness	TC-rich repeats
PgGF14-18	868	918	defense and stress responsiveness	TC-rich repeats
PgGF14-18	430	480	defense and stress responsiveness	TC-rich repeats
PgGF14-2	201	251	defense and stress responsiveness	TC-rich repeats
PgGF14-20	1819	1869	defense and stress responsiveness	TC-rich repeats
PgGF14-21	1811	1861	defense and stress responsiveness	TC-rich repeats
PgGF14-22	907	957	defense and stress responsiveness	TC-rich repeats
PgGF14-22	549	599	defense and stress responsiveness	TC-rich repeats
PgGF14-23	596	646	defense and stress responsiveness	TC-rich repeats
PgGF14-29	1158	1208	defense and stress responsiveness	TC-rich repeats
PgGF14-3	502	552	defense and stress responsiveness	TC-rich repeats
PgGF14-30	186	236	defense and stress responsiveness	TC-rich repeats
PgGF14-34	1201	1251	defense and stress responsiveness	TC-rich repeats
PgGF14-34	96	146	defense and stress responsiveness	TC-rich repeats
PgGF14-37	1636	1686	defense and stress responsiveness	TC-rich repeats
PgGF14-37	1008	1058	defense and stress responsiveness	TC-rich repeats
PgGF14-39	1255	1305	defense and stress responsiveness	TC-rich repeats
PgGF14-40	1905	1955	defense and stress responsiveness	TC-rich repeats
PgGF14-41	1480	1530	defense and stress responsiveness	TC-rich repeats
PgGF14-41	768	818	defense and stress responsiveness	TC-rich repeats
PgGF14-42	1275	1325	defense and stress responsiveness	TC-rich repeats
PgGF14-42	1005	1055	defense and stress responsiveness	TC-rich repeats
PgGF14-8	1299	1349	defense and stress responsiveness	TC-rich repeats
PgGF14-8	799	849	defense and stress responsiveness	TC-rich repeats
PgGF14-10	702	752	endosperm expression	GCN4_motif
PgGF14-11	487	537	endosperm expression	GCN4_motif
PgGF14-13	143	193	endosperm expression	GCN4_motif
PgGF14-34	995	1045	endosperm expression	GCN4_motif
PgGF14-40	1325	1375	endosperm expression	GCN4_motif
PgGF14-1	622	672	gibberellin-responsive element	P-box
PgGF14-10	252	302	gibberellin-responsive element	P-box
PgGF14-12	900	950	gibberellin-responsive element	P-box
PgGF14-14	1514	1564	gibberellin-responsive element	P-box
PgGF14-15	894	944	gibberellin-responsive element	P-box
PgGF14-16	1823	1873	gibberellin-responsive element	P-box
PgGF14-18	709	759	gibberellin-responsive element	P-box
PgGF14-19	263	313	gibberellin-responsive element	P-box
PgGF14-2	1435	1485	gibberellin-responsive element	P-box
PgGF14-22	848	898	gibberellin-responsive element	P-box
PgGF14-27	1006	1056	gibberellin-responsive element	P-box
PgGF14-27	595	645	gibberellin-responsive element	P-box
PgGF14-29	564	614	gibberellin-responsive element	P-box
PgGF14-3	763	813	gibberellin-responsive element	P-box
PgGF14-30	1509	1559	gibberellin-responsive element	P-box
PgGF14-30	338	388	gibberellin-responsive element	P-box
PgGF14-33	763	813	gibberellin-responsive element	P-box
PgGF14-34	565	615	gibberellin-responsive element	P-box
PgGF14-35	398	448	gibberellin-responsive element	P-box
PgGF14-35	1676	1726	gibberellin-responsive element	P-box
PgGF14-36	1827	1877	gibberellin-responsive element	P-box
PgGF14-36	1253	1303	gibberellin-responsive element	P-box
PgGF14-42	1149	1199	gibberellin-responsive element	P-box
PgGF14-5	1088	1138	gibberellin-responsive element	P-box
PgGF14-7	377	427	gibberellin-responsive element	P-box
PgGF14-13	929	979	light responsiveness	G-box
PgGF14-19	412	462	light responsiveness	G-box
PgGF14-25	319	369	light responsiveness	G-box
PgGF14-28	1667	1717	light responsiveness	G-box
PgGF14-34	667	717	light responsiveness	G-box
PgGF14-37	581	631	light responsiveness	G-box
PgGF14-5	1677	1727	light responsiveness	G-box
PgGF14-1	1382	1432	low-temperature responsiveness	LTR
PgGF14-11	1263	1313	low-temperature responsiveness	LTR
PgGF14-12	637	687	low-temperature responsiveness	LTR
PgGF14-19	137	187	low-temperature responsiveness	LTR
PgGF14-2	318	368	low-temperature responsiveness	LTR
PgGF14-20	1607	1657	low-temperature responsiveness	LTR
PgGF14-20	1204	1254	low-temperature responsiveness	LTR
PgGF14-23	1528	1578	low-temperature responsiveness	LTR
PgGF14-23	724	774	low-temperature responsiveness	LTR
PgGF14-26	122	172	low-temperature responsiveness	LTR
PgGF14-28	394	444	low-temperature responsiveness	LTR
PgGF14-3	1588	1638	low-temperature responsiveness	LTR
PgGF14-3	1497	1547	low-temperature responsiveness	LTR
PgGF14-32	536	586	low-temperature responsiveness	LTR
PgGF14-33	1197	1247	low-temperature responsiveness	LTR
PgGF14-33	865	915	low-temperature responsiveness	LTR
PgGF14-35	585	635	low-temperature responsiveness	LTR
PgGF14-35	316	366	low-temperature responsiveness	LTR
PgGF14-39	1914	1964	low-temperature responsiveness	LTR
PgGF14-4	541	591	low-temperature responsiveness	LTR
PgGF14-4	114	164	low-temperature responsiveness	LTR
PgGF14-40	109	159	low-temperature responsiveness	LTR
PgGF14-5	701	751	low-temperature responsiveness	LTR
PgGF14-5	277	327	low-temperature responsiveness	LTR
PgGF14-10	1865	1915	MeJA-responsiveness	TGACG-motif
PgGF14-10	1145	1195	MeJA-responsiveness	TGACG-motif
PgGF14-10	431	481	MeJA-responsiveness	TGACG-motif
PgGF14-11	1597	1647	MeJA-responsiveness	TGACG-motif
PgGF14-11	1339	1389	MeJA-responsiveness	TGACG-motif
PgGF14-11	1040	1090	MeJA-responsiveness	TGACG-motif
PgGF14-12	1066	1116	MeJA-responsiveness	TGACG-motif
PgGF14-12	400	450	MeJA-responsiveness	TGACG-motif
PgGF14-13	1017	1067	MeJA-responsiveness	TGACG-motif
PgGF14-13	835	885	MeJA-responsiveness	TGACG-motif
PgGF14-15	281	331	MeJA-responsiveness	TGACG-motif
PgGF14-16	575	625	MeJA-responsiveness	TGACG-motif
PgGF14-16	390	440	MeJA-responsiveness	TGACG-motif
PgGF14-18	1897	1947	MeJA-responsiveness	TGACG-motif
PgGF14-19	1721	1771	MeJA-responsiveness	TGACG-motif
PgGF14-2	1827	1877	MeJA-responsiveness	TGACG-motif
PgGF14-2	775	825	MeJA-responsiveness	TGACG-motif
PgGF14-20	1339	1389	MeJA-responsiveness	TGACG-motif
PgGF14-20	139	189	MeJA-responsiveness	TGACG-motif
PgGF14-21	1341	1391	MeJA-responsiveness	TGACG-motif
PgGF14-22	1898	1948	MeJA-responsiveness	TGACG-motif
PgGF14-22	365	415	MeJA-responsiveness	TGACG-motif
PgGF14-23	1903	1953	MeJA-responsiveness	TGACG-motif
PgGF14-23	1172	1222	MeJA-responsiveness	TGACG-motif
PgGF14-25	834	884	MeJA-responsiveness	TGACG-motif
PgGF14-28	1902	1952	MeJA-responsiveness	TGACG-motif
PgGF14-29	1464	1514	MeJA-responsiveness	TGACG-motif
PgGF14-29	1047	1097	MeJA-responsiveness	TGACG-motif
PgGF14-29	454	504	MeJA-responsiveness	TGACG-motif
PgGF14-3	1109	1159	MeJA-responsiveness	TGACG-motif
PgGF14-31	120	170	MeJA-responsiveness	TGACG-motif
PgGF14-34	1094	1144	MeJA-responsiveness	TGACG-motif
PgGF14-34	336	386	MeJA-responsiveness	TGACG-motif
PgGF14-35	1448	1498	MeJA-responsiveness	TGACG-motif
PgGF14-35	988	1038	MeJA-responsiveness	TGACG-motif
PgGF14-35	701	751	MeJA-responsiveness	TGACG-motif
PgGF14-36	1638	1688	MeJA-responsiveness	TGACG-motif
PgGF14-37	901	951	MeJA-responsiveness	TGACG-motif
PgGF14-37	47	97	MeJA-responsiveness	TGACG-motif
PgGF14-38	1906	1956	MeJA-responsiveness	TGACG-motif
PgGF14-38	1907	1957	MeJA-responsiveness	TGACG-motif
PgGF14-38	1548	1598	MeJA-responsiveness	TGACG-motif
PgGF14-38	836	886	MeJA-responsiveness	TGACG-motif
PgGF14-4	627	677	MeJA-responsiveness	TGACG-motif
PgGF14-40	1846	1896	MeJA-responsiveness	TGACG-motif
PgGF14-40	873	923	MeJA-responsiveness	TGACG-motif
PgGF14-40	622	672	MeJA-responsiveness	TGACG-motif
PgGF14-40	234	284	MeJA-responsiveness	TGACG-motif
PgGF14-41	218	268	MeJA-responsiveness	TGACG-motif
PgGF14-42	509	559	MeJA-responsiveness	TGACG-motif
PgGF14-42	384	434	MeJA-responsiveness	TGACG-motif
PgGF14-42	129	179	MeJA-responsiveness	TGACG-motif
PgGF14-7	1362	1412	MeJA-responsiveness	TGACG-motif
PgGF14-7	1148	1198	MeJA-responsiveness	TGACG-motif
PgGF14-9	1869	1919	MeJA-responsiveness	TGACG-motif
PgGF14-9	1232	1282	MeJA-responsiveness	TGACG-motif
PgGF14-1	951	1001	meristem expression	CAT-box
PgGF14-11	1177	1227	meristem expression	CAT-box
PgGF14-11	192	242	meristem expression	CAT-box
PgGF14-13	1090	1140	meristem expression	CAT-box
PgGF14-16	487	537	meristem expression	CAT-box
PgGF14-18	544	594	meristem expression	CAT-box
PgGF14-2	584	634	meristem expression	CAT-box
PgGF14-22	683	733	meristem expression	CAT-box
PgGF14-23	1039	1089	meristem expression	CAT-box
PgGF14-3	997	1047	meristem expression	CAT-box
PgGF14-33	366	416	meristem expression	CAT-box
PgGF14-35	1178	1228	meristem expression	CAT-box
PgGF14-36	1055	1105	meristem expression	CAT-box
PgGF14-36	706	756	meristem expression	CAT-box
PgGF14-42	1477	1527	meristem expression	CAT-box
PgGF14-5	65	115	meristem expression	CAT-box
PgGF14-12	290	340	MYB binding site involved in drought-inducibility	MBS
PgGF14-13	1367	1417	MYB binding site involved in drought-inducibility	MBS
PgGF14-13	452	502	MYB binding site involved in drought-inducibility	MBS
PgGF14-15	1156	1206	MYB binding site involved in drought-inducibility	MBS
PgGF14-17	1041	1091	MYB binding site involved in drought-inducibility	MBS
PgGF14-17	360	410	MYB binding site involved in drought-inducibility	MBS
PgGF14-18	1889	1939	MYB binding site involved in drought-inducibility	MBS
PgGF14-18	149	199	MYB binding site involved in drought-inducibility	MBS
PgGF14-22	148	198	MYB binding site involved in drought-inducibility	MBS
PgGF14-25	1902	1952	MYB binding site involved in drought-inducibility	MBS
PgGF14-27	535	585	MYB binding site involved in drought-inducibility	MBS
PgGF14-34	1337	1387	MYB binding site involved in drought-inducibility	MBS
PgGF14-34	772	822	MYB binding site involved in drought-inducibility	MBS
PgGF14-36	949	999	MYB binding site involved in drought-inducibility	MBS
PgGF14-39	1588	1638	MYB binding site involved in drought-inducibility	MBS
PgGF14-41	342	392	MYB binding site involved in drought-inducibility	MBS
PgGF14-7	228	278	MYB binding site involved in drought-inducibility	MBS
PgGF14-15	1479	1529	MYB binding site involved in flavonoid biosynthetic genes regulation	MBSI
PgGF14-17	1732	1782	MYB binding site involved in flavonoid biosynthetic genes regulation	MBSI
PgGF14-19	1850	1900	MYB binding site involved in flavonoid biosynthetic genes regulation	MBSI
PgGF14-26	1082	1132	MYB binding site involved in flavonoid biosynthetic genes regulation	MBSI
PgGF14-27	1714	1764	MYB binding site involved in flavonoid biosynthetic genes regulation	MBSI
PgGF14-5	1787	1837	MYB binding site involved in flavonoid biosynthetic genes regulation	MBSI
PgGF14-6	1732	1782	MYB binding site involved in flavonoid biosynthetic genes regulation	MBSI
PgGF14-1	1907	1957	MYB binding site involved in light responsiveness	MRE
PgGF14-12	137	187	MYB binding site involved in light responsiveness	MRE
PgGF14-15	169	219	MYB binding site involved in light responsiveness	MRE
PgGF14-17	1180	1230	MYB binding site involved in light responsiveness	MRE
PgGF14-17	817	867	MYB binding site involved in light responsiveness	MRE
PgGF14-18	1227	1277	MYB binding site involved in light responsiveness	MRE
PgGF14-25	710	760	MYB binding site involved in light responsiveness	MRE
PgGF14-26	765	815	MYB binding site involved in light responsiveness	MRE
PgGF14-28	670	720	MYB binding site involved in light responsiveness	MRE
PgGF14-29	247	297	MYB binding site involved in light responsiveness	MRE
PgGF14-31	377	427	MYB binding site involved in light responsiveness	MRE
PgGF14-32	397	447	MYB binding site involved in light responsiveness	MRE
PgGF14-4	1879	1929	MYB binding site involved in light responsiveness	MRE
PgGF14-4	360	410	MYB binding site involved in light responsiveness	MRE
PgGF14-11	101	151	MYBHv1 binding site	CCAAT-box
PgGF14-18	1781	1831	MYBHv1 binding site	CCAAT-box
PgGF14-19	850	900	MYBHv1 binding site	CCAAT-box
PgGF14-22	1842	1892	MYBHv1 binding site	CCAAT-box
PgGF14-23	1796	1846	MYBHv1 binding site	CCAAT-box
PgGF14-25	172	222	MYBHv1 binding site	CCAAT-box
PgGF14-26	1850	1900	MYBHv1 binding site	CCAAT-box
PgGF14-28	1586	1636	MYBHv1 binding site	CCAAT-box
PgGF14-29	1748	1798	MYBHv1 binding site	CCAAT-box
PgGF14-31	605	655	MYBHv1 binding site	CCAAT-box
PgGF14-33	1802	1852	MYBHv1 binding site	CCAAT-box
PgGF14-33	633	683	MYBHv1 binding site	CCAAT-box
PgGF14-37	1761	1811	MYBHv1 binding site	CCAAT-box
PgGF14-38	1099	1149	MYBHv1 binding site	CCAAT-box
PgGF14-12	779	829	palisade mesophyll cells	HD-Zip 1
PgGF14-14	409	459	palisade mesophyll cells	HD-Zip 1
PgGF14-14	281	331	palisade mesophyll cells	HD-Zip 1
PgGF14-33	258	308	palisade mesophyll cells	HD-Zip 1
PgGF14-10	1008	1058	salicylic acid responsiveness	TCA-element
PgGF14-11	1888	1938	salicylic acid responsiveness	TCA-element
PgGF14-13	1169	1219	salicylic acid responsiveness	TCA-element
PgGF14-15	988	1038	salicylic acid responsiveness	TCA-element
PgGF14-16	1327	1377	salicylic acid responsiveness	TCA-element
PgGF14-18	47	97	salicylic acid responsiveness	TCA-element
PgGF14-19	1405	1455	salicylic acid responsiveness	TCA-element
PgGF14-20	1460	1510	salicylic acid responsiveness	TCA-element
PgGF14-20	927	977	salicylic acid responsiveness	TCA-element
PgGF14-21	1619	1669	salicylic acid responsiveness	TCA-element
PgGF14-22	36	86	salicylic acid responsiveness	TCA-element
PgGF14-33	952	1002	salicylic acid responsiveness	TCA-element
PgGF14-5	1218	1268	salicylic acid responsiveness	TCA-element
PgGF14-7	487	537	salicylic acid responsiveness	TCA-element
PgGF14-11	274	324	seed-specific regulation	RY-element
PgGF14-38	1772	1822	wound-responsive element	WUN-motif
PgGF14-1	1716	1766	zein metabolism regulation	O2-site
PgGF14-11	1407	1457	zein metabolism regulation	O2-site
PgGF14-15	407	457	zein metabolism regulation	O2-site
PgGF14-19	499	549	zein metabolism regulation	O2-site
PgGF14-19	48	98	zein metabolism regulation	O2-site
PgGF14-2	1756	1806	zein metabolism regulation	O2-site
PgGF14-23	1885	1935	zein metabolism regulation	O2-site
PgGF14-26	430	480	zein metabolism regulation	O2-site
PgGF14-28	150	200	zein metabolism regulation	O2-site
PgGF14-29	1289	1339	zein metabolism regulation	O2-site
PgGF14-29	43	93	zein metabolism regulation	O2-site
PgGF14-3	1855	1905	zein metabolism regulation	O2-site
PgGF14-32	1293	1343	zein metabolism regulation	O2-site
PgGF14-34	234	284	zein metabolism regulation	O2-site
PgGF14-35	799	849	zein metabolism regulation	O2-site
PgGF14-38	640	690	zein metabolism regulation	O2-site
PgGF14-6	1361	1411	zein metabolism regulation	O2-site
PgGF14-6	1064	1114	zein metabolism regulation	O2-site
