# Supplementary material for: Molecular analysis of the 14-3-3 genes in Panax ginseng and their responses to heat stress
Source: PeerJ. 2023 May 9;11:e15331. doi: 10.7717/peerj.15331 (PMC10178371; doi:10.7717/peerj.15331)
Supplement: Supplemental Information 4 — All GO annotations for PgGF14s by the eggNOG and the filtering results at level 2. [file peerj-11-15331-s004.xlsx]

## Sheet: GO Annotion
GO annotation for PgGF14s
Gene ID	Gene name	GO terms	GO class	GO function
Pg_S2020.18	PgGF14-18	GO:0030437	Biological process	ascospore formation
Pg_S2020.18	PgGF14-18	GO:0005524	Molecular function	ATP binding
Pg_S2020.18	PgGF14-18	GO:0007411	Biological process	axon guidance
Pg_S2020.18	PgGF14-18	GO:0033267	Cellular component	axon part
Pg_S2020.18	PgGF14-18	GO:0009742	Biological process	brassinosteroid mediated signaling pathway
Pg_S2020.18	PgGF14-18	GO:0005509	Molecular function	calcium ion binding
Pg_S2020.18	PgGF14-18	GO:0005618	Cellular component	cell wall
Pg_S2020.18	PgGF14-18	GO:0021987	Biological process	cerebral cortex development
Pg_S2020.18	PgGF14-18	GO:0009570	Cellular component	chloroplast stroma
Pg_S2020.18	PgGF14-18	GO:0005694	Cellular component	chromosome
Pg_S2020.18	PgGF14-18	GO:0019344	Biological process	cysteine biosynthetic process
Pg_S2020.18	PgGF14-18	GO:0005829	Cellular component	cytosol
Pg_S2020.18	PgGF14-18	GO:0008340	Biological process	determination of adult lifespan
Pg_S2020.18	PgGF14-18	GO:0006270	Biological process	DNA replication initiation
Pg_S2020.18	PgGF14-18	GO:0003688	Molecular function	DNA replication origin binding
Pg_S2020.18	PgGF14-18	GO:0034221	Biological process	fungal-type cell wall chitin biosynthetic process
Pg_S2020.18	PgGF14-18	GO:0000086	Biological process	G2/M transition of mitotic cell cycle
Pg_S2020.18	PgGF14-18	GO:0007294	Biological process	germarium-derived oocyte fate determination
Pg_S2020.18	PgGF14-18	GO:0045172	Cellular component	germline ring canal
Pg_S2020.18	PgGF14-18	GO:0006096	Biological process	glycolysis
Pg_S2020.18	PgGF14-18	GO:0007030	Biological process	Golgi organization
Pg_S2020.18	PgGF14-18	GO:0035329	Biological process	hippo signaling cascade
Pg_S2020.18	PgGF14-18	GO:0021766	Biological process	hippocampus development
Pg_S2020.18	PgGF14-18	GO:0042826	Molecular function	histone deacetylase binding
Pg_S2020.18	PgGF14-18	GO:0042744	Biological process	hydrogen peroxide catabolic process
Pg_S2020.18	PgGF14-18	GO:0016818	Molecular function	hydrolase activity, acting on acid anhydrides, in phosphorus-containing anhydrides
Pg_S2020.18	PgGF14-18	GO:0006972	Biological process	hyperosmotic response
Pg_S2020.18	PgGF14-18	GO:0019288	Biological process	isopentenyl diphosphate biosynthetic process, mevalonate-independent pathway
Pg_S2020.18	PgGF14-18	GO:0005871	Cellular component	kinesin complex
Pg_S2020.18	PgGF14-18	GO:0048366	Biological process	leaf development
Pg_S2020.18	PgGF14-18	GO:0042470	Cellular component	melanosome
Pg_S2020.18	PgGF14-18	GO:0005739	Cellular component	mitochondrion
Pg_S2020.18	PgGF14-18	GO:0007095	Biological process	mitotic G2 DNA damage checkpoint
Pg_S2020.18	PgGF14-18	GO:0004497	Molecular function	monooxygenase activity
Pg_S2020.18	PgGF14-18	GO:0035308	Biological process	negative regulation of protein dephosphorylation
Pg_S2020.18	PgGF14-18	GO:0051436	Biological process	negative regulation of ubiquitin-protein ligase activity involved in mitotic cell cycle
Pg_S2020.18	PgGF14-18	GO:0001764	Biological process	neuron migration
Pg_S2020.18	PgGF14-18	GO:0048011	Biological process	neurotrophin TRK receptor signaling pathway
Pg_S2020.18	PgGF14-18	GO:0046958	Biological process	nonassociative learning
Pg_S2020.18	PgGF14-18	GO:0005635	Cellular component	nuclear envelope
Pg_S2020.18	PgGF14-18	GO:0008103	Biological process	oocyte microtubule cytoskeleton polarization
Pg_S2020.18	PgGF14-18	GO:0055114	Biological process	oxidation-reduction process
Pg_S2020.18	PgGF14-18	GO:0004623	Molecular function	phospholipase A2 activity
Pg_S2020.18	PgGF14-18	GO:0050815	Molecular function	phosphoserine binding
Pg_S2020.18	PgGF14-18	GO:0005886	Cellular component	plasma membrane
Pg_S2020.18	PgGF14-18	GO:0009506	Cellular component	plasmodesma
Pg_S2020.18	PgGF14-18	GO:0007280	Biological process	pole cell migration
Pg_S2020.18	PgGF14-18	GO:0045927	Biological process	positive regulation of growth
Pg_S2020.18	PgGF14-18	GO:0048528	Biological process	post-embryonic root development
Pg_S2020.18	PgGF14-18	GO:0006267	Biological process	pre-replicative complex assembly
Pg_S2020.18	PgGF14-18	GO:0032403	Molecular function	protein complex binding
Pg_S2020.18	PgGF14-18	GO:0019904	Molecular function	protein domain specific binding
Pg_S2020.18	PgGF14-18	GO:0046982	Molecular function	protein heterodimerization activity
Pg_S2020.18	PgGF14-18	GO:0008426	Molecular function	protein kinase C inhibitor activity
Pg_S2020.18	PgGF14-18	GO:0006605	Biological process	protein targeting
Pg_S2020.18	PgGF14-18	GO:0007124	Biological process	pseudohyphal growth
Pg_S2020.18	PgGF14-18	GO:0007265	Biological process	Ras protein signal transduction
Pg_S2020.18	PgGF14-18	GO:0007088	Biological process	regulation of mitosis
Pg_S2020.18	PgGF14-18	GO:0032880	Biological process	regulation of protein localization
Pg_S2020.18	PgGF14-18	GO:0006355	Biological process	regulation of transcription, DNA-dependent
Pg_S2020.18	PgGF14-18	GO:0009737	Biological process	response to abscisic acid stimulus
Pg_S2020.18	PgGF14-18	GO:0046686	Biological process	response to cadmium ion
Pg_S2020.18	PgGF14-18	GO:0009750	Biological process	response to fructose stimulus
Pg_S2020.18	PgGF14-18	GO:0009651	Biological process	response to salt stress
Pg_S2020.18	PgGF14-18	GO:0009266	Biological process	response to temperature stimulus
Pg_S2020.18	PgGF14-18	GO:0009411	Biological process	response to UV
Pg_S2020.18	PgGF14-18	GO:0001402	Biological process	signal transduction involved in filamentous growth
Pg_S2020.18	PgGF14-18	GO:0019048	Biological process	virus-host interaction
Pg_S2020.18	PgGF14-18	GO:0006833	Biological process	water transport
Pg_S2020.18	PgGF14-18	GO:0048190	Biological process	wing disc dorsal/ventral pattern formation
Pg_S0778.7	PgGF14-3	GO:0005524	Molecular function	ATP binding
Pg_S0778.7	PgGF14-3	GO:0009986	Cellular component	cell surface
Pg_S0778.7	PgGF14-3	GO:0044085	Biological process	cellular component biogenesis
Pg_S0778.7	PgGF14-3	GO:0044264	Biological process	cellular polysaccharide metabolic process
Pg_S0778.7	PgGF14-3	GO:0071216	Biological process	cellular response to biotic stimulus
Pg_S0778.7	PgGF14-3	GO:0034605	Biological process	cellular response to heat
Pg_S0778.7	PgGF14-3	GO:0036244	Biological process	cellular response to neutral pH
Pg_S0778.7	PgGF14-3	GO:0001410	Biological process	chlamydospore formation
Pg_S0778.7	PgGF14-3	GO:0009570	Cellular component	chloroplast stroma
Pg_S0778.7	PgGF14-3	GO:0005829	Cellular component	cytosol
Pg_S0778.7	PgGF14-3	GO:0000077	Biological process	DNA damage checkpoint
Pg_S0778.7	PgGF14-3	GO:0006261	Biological process	DNA-dependent DNA replication
Pg_S0778.7	PgGF14-3	GO:0009793	Biological process	embryo development ending in seed dormancy
Pg_S0778.7	PgGF14-3	GO:0006888	Biological process	ER to Golgi vesicle-mediated transport
Pg_S0778.7	PgGF14-3	GO:0036180	Biological process	filamentous growth of a population of unicellular organisms in response to biotic stimulus
Pg_S0778.7	PgGF14-3	GO:0036168	Biological process	filamentous growth of a population of unicellular organisms in response to heat
Pg_S0778.7	PgGF14-3	GO:0036178	Biological process	filamentous growth of a population of unicellular organisms in response to neutral pH
Pg_S0778.7	PgGF14-3	GO:0048449	Biological process	floral organ formation
Pg_S0778.7	PgGF14-3	GO:0005794	Cellular component	Golgi apparatus
Pg_S0778.7	PgGF14-3	GO:0016570	Biological process	histone modification
Pg_S0778.7	PgGF14-3	GO:0016818	Molecular function	hydrolase activity, acting on acid anhydrides, in phosphorus-containing anhydrides
Pg_S0778.7	PgGF14-3	GO:0009965	Biological process	leaf morphogenesis
Pg_S0778.7	PgGF14-3	GO:0005739	Cellular component	mitochondrion
Pg_S0778.7	PgGF14-3	GO:0043581	Biological process	mycelium development
Pg_S0778.7	PgGF14-3	GO:0005635	Cellular component	nuclear envelope
Pg_S0778.7	PgGF14-3	GO:0009405	Biological process	pathogenesis
Pg_S0778.7	PgGF14-3	GO:0004623	Molecular function	phospholipase A2 activity
Pg_S0778.7	PgGF14-3	GO:0005886	Cellular component	plasma membrane
Pg_S0778.7	PgGF14-3	GO:0009506	Cellular component	plasmodesma
Pg_S0778.7	PgGF14-3	GO:1900445	Biological process	positive regulation of filamentous growth of a population of unicellular organisms in response to biotic stimulus
Pg_S0778.7	PgGF14-3	GO:1900442	Biological process	positive regulation of filamentous growth of a population of unicellular organisms in response to neutral pH
Pg_S0778.7	PgGF14-3	GO:0019904	Molecular function	protein domain specific binding
Pg_S0778.7	PgGF14-3	GO:0006486	Biological process	protein glycosylation
Pg_S0778.7	PgGF14-3	GO:0008426	Molecular function	protein kinase C inhibitor activity
Pg_S0778.7	PgGF14-3	GO:0045309	Molecular function	protein phosphorylated amino acid binding
Pg_S0778.7	PgGF14-3	GO:0006109	Biological process	regulation of carbohydrate metabolic process
Pg_S0778.7	PgGF14-3	GO:0009909	Biological process	regulation of flower development
Pg_S0778.7	PgGF14-3	GO:0061062	Biological process	regulation of nematode larval development
Pg_S0778.7	PgGF14-3	GO:0006355	Biological process	regulation of transcription, DNA-dependent
Pg_S0778.7	PgGF14-3	GO:0009737	Biological process	response to abscisic acid stimulus
Pg_S0778.7	PgGF14-3	GO:0046686	Biological process	response to cadmium ion
Pg_S0778.7	PgGF14-3	GO:0010218	Biological process	response to far red light
Pg_S0778.7	PgGF14-3	GO:0080167	Biological process	response to karrikin
Pg_S0778.7	PgGF14-3	GO:0009624	Biological process	response to nematode
Pg_S0778.7	PgGF14-3	GO:0010114	Biological process	response to red light
Pg_S0778.7	PgGF14-3	GO:0048364	Biological process	root development
Pg_S0778.7	PgGF14-3	GO:0010162	Biological process	seed dormancy process
Pg_S0778.7	PgGF14-3	GO:0009845	Biological process	seed germination
Pg_S0778.7	PgGF14-3	GO:0009407	Biological process	toxin catabolic process
Pg_S0778.7	PgGF14-3	GO:0005774	Cellular component	vacuolar membrane
Pg_S0778.7	PgGF14-3	GO:0030445	Cellular component	yeast-form cell wall
Pg_S1693.13	PgGF14-24	GO:0005524	Molecular function	ATP binding
Pg_S1693.13	PgGF14-24	GO:0007411	Biological process	axon guidance
Pg_S1693.13	PgGF14-24	GO:0033267	Cellular component	axon part
Pg_S1693.13	PgGF14-24	GO:0009742	Biological process	brassinosteroid mediated signaling pathway
Pg_S1693.13	PgGF14-24	GO:0005509	Molecular function	calcium ion binding
Pg_S1693.13	PgGF14-24	GO:0003824	Molecular function	catalytic activity
Pg_S1693.13	PgGF14-24	GO:0044085	Biological process	cellular component biogenesis
Pg_S1693.13	PgGF14-24	GO:0044264	Biological process	cellular polysaccharide metabolic process
Pg_S1693.13	PgGF14-24	GO:0021987	Biological process	cerebral cortex development
Pg_S1693.13	PgGF14-24	GO:0009570	Cellular component	chloroplast stroma
Pg_S1693.13	PgGF14-24	GO:0005694	Cellular component	chromosome
Pg_S1693.13	PgGF14-24	GO:0019344	Biological process	cysteine biosynthetic process
Pg_S1693.13	PgGF14-24	GO:0005829	Cellular component	cytosol
Pg_S1693.13	PgGF14-24	GO:0008340	Biological process	determination of adult lifespan
Pg_S1693.13	PgGF14-24	GO:0006261	Biological process	DNA-dependent DNA replication
Pg_S1693.13	PgGF14-24	GO:0030447	Biological process	filamentous growth
Pg_S1693.13	PgGF14-24	GO:0000086	Biological process	G2/M transition of mitotic cell cycle
Pg_S1693.13	PgGF14-24	GO:0007294	Biological process	germarium-derived oocyte fate determination
Pg_S1693.13	PgGF14-24	GO:0045172	Cellular component	germline ring canal
Pg_S1693.13	PgGF14-24	GO:0006096	Biological process	glycolysis
Pg_S1693.13	PgGF14-24	GO:0007030	Biological process	Golgi organization
Pg_S1693.13	PgGF14-24	GO:0035329	Biological process	hippo signaling cascade
Pg_S1693.13	PgGF14-24	GO:0021766	Biological process	hippocampus development
Pg_S1693.13	PgGF14-24	GO:0042826	Molecular function	histone deacetylase binding
Pg_S1693.13	PgGF14-24	GO:0042744	Biological process	hydrogen peroxide catabolic process
Pg_S1693.13	PgGF14-24	GO:0006972	Biological process	hyperosmotic response
Pg_S1693.13	PgGF14-24	GO:0019288	Biological process	isopentenyl diphosphate biosynthetic process, mevalonate-independent pathway
Pg_S1693.13	PgGF14-24	GO:0005871	Cellular component	kinesin complex
Pg_S1693.13	PgGF14-24	GO:0048366	Biological process	leaf development
Pg_S1693.13	PgGF14-24	GO:0005739	Cellular component	mitochondrion
Pg_S1693.13	PgGF14-24	GO:0007095	Biological process	mitotic G2 DNA damage checkpoint
Pg_S1693.13	PgGF14-24	GO:0043581	Biological process	mycelium development
Pg_S1693.13	PgGF14-24	GO:0035308	Biological process	negative regulation of protein dephosphorylation
Pg_S1693.13	PgGF14-24	GO:0001764	Biological process	neuron migration
Pg_S1693.13	PgGF14-24	GO:0048011	Biological process	neurotrophin TRK receptor signaling pathway
Pg_S1693.13	PgGF14-24	GO:0046958	Biological process	nonassociative learning
Pg_S1693.13	PgGF14-24	GO:0005634	Cellular component	nucleus
Pg_S1693.13	PgGF14-24	GO:0008103	Biological process	oocyte microtubule cytoskeleton polarization
Pg_S1693.13	PgGF14-24	GO:0055114	Biological process	oxidation-reduction process
Pg_S1693.13	PgGF14-24	GO:0050815	Molecular function	phosphoserine binding
Pg_S1693.13	PgGF14-24	GO:0005886	Cellular component	plasma membrane
Pg_S1693.13	PgGF14-24	GO:0009506	Cellular component	plasmodesma
Pg_S1693.13	PgGF14-24	GO:0007280	Biological process	pole cell migration
Pg_S1693.13	PgGF14-24	GO:0045927	Biological process	positive regulation of growth
Pg_S1693.13	PgGF14-24	GO:0048528	Biological process	post-embryonic root development
Pg_S1693.13	PgGF14-24	GO:0032403	Molecular function	protein complex binding
Pg_S1693.13	PgGF14-24	GO:0019904	Molecular function	protein domain specific binding
Pg_S1693.13	PgGF14-24	GO:0046982	Molecular function	protein heterodimerization activity
Pg_S1693.13	PgGF14-24	GO:0008426	Molecular function	protein kinase C inhibitor activity
Pg_S1693.13	PgGF14-24	GO:0006605	Biological process	protein targeting
Pg_S1693.13	PgGF14-24	GO:0007265	Biological process	Ras protein signal transduction
Pg_S1693.13	PgGF14-24	GO:0007088	Biological process	regulation of mitosis
Pg_S1693.13	PgGF14-24	GO:0032880	Biological process	regulation of protein localization
Pg_S1693.13	PgGF14-24	GO:0009737	Biological process	response to abscisic acid stimulus
Pg_S1693.13	PgGF14-24	GO:0046686	Biological process	response to cadmium ion
Pg_S1693.13	PgGF14-24	GO:0009750	Biological process	response to fructose stimulus
Pg_S1693.13	PgGF14-24	GO:0009651	Biological process	response to salt stress
Pg_S1693.13	PgGF14-24	GO:0009266	Biological process	response to temperature stimulus
Pg_S1693.13	PgGF14-24	GO:0009411	Biological process	response to UV
Pg_S1693.13	PgGF14-24	GO:0006833	Biological process	water transport
Pg_S1693.13	PgGF14-24	GO:0048190	Biological process	wing disc dorsal/ventral pattern formation
Pg_S4893.15	PgGF14-15	GO:0030437	Biological process	ascospore formation
Pg_S4893.15	PgGF14-15	GO:0005524	Molecular function	ATP binding
Pg_S4893.15	PgGF14-15	GO:0033267	Cellular component	axon part
Pg_S4893.15	PgGF14-15	GO:0009742	Biological process	brassinosteroid mediated signaling pathway
Pg_S4893.15	PgGF14-15	GO:0005618	Cellular component	cell wall
Pg_S4893.15	PgGF14-15	GO:0021987	Biological process	cerebral cortex development
Pg_S4893.15	PgGF14-15	GO:0009570	Cellular component	chloroplast stroma
Pg_S4893.15	PgGF14-15	GO:0005829	Cellular component	cytosol
Pg_S4893.15	PgGF14-15	GO:0000077	Biological process	DNA damage checkpoint
Pg_S4893.15	PgGF14-15	GO:0006270	Biological process	DNA replication initiation
Pg_S4893.15	PgGF14-15	GO:0003688	Molecular function	DNA replication origin binding
Pg_S4893.15	PgGF14-15	GO:0009793	Biological process	embryo development ending in seed dormancy
Pg_S4893.15	PgGF14-15	GO:0006888	Biological process	ER to Golgi vesicle-mediated transport
Pg_S4893.15	PgGF14-15	GO:0048449	Biological process	floral organ formation
Pg_S4893.15	PgGF14-15	GO:0034221	Biological process	fungal-type cell wall chitin biosynthetic process
Pg_S4893.15	PgGF14-15	GO:0000086	Biological process	G2/M transition of mitotic cell cycle
Pg_S4893.15	PgGF14-15	GO:0005977	Biological process	glycogen metabolic process
Pg_S4893.15	PgGF14-15	GO:0005794	Cellular component	Golgi apparatus
Pg_S4893.15	PgGF14-15	GO:0035329	Biological process	hippo signaling cascade
Pg_S4893.15	PgGF14-15	GO:0021766	Biological process	hippocampus development
Pg_S4893.15	PgGF14-15	GO:0042826	Molecular function	histone deacetylase binding
Pg_S4893.15	PgGF14-15	GO:0016570	Biological process	histone modification
Pg_S4893.15	PgGF14-15	GO:0016818	Molecular function	hydrolase activity, acting on acid anhydrides, in phosphorus-containing anhydrides
Pg_S4893.15	PgGF14-15	GO:0005871	Cellular component	kinesin complex
Pg_S4893.15	PgGF14-15	GO:0009965	Biological process	leaf morphogenesis
Pg_S4893.15	PgGF14-15	GO:0042470	Cellular component	melanosome
Pg_S4893.15	PgGF14-15	GO:0005739	Cellular component	mitochondrion
Pg_S4893.15	PgGF14-15	GO:0004497	Molecular function	monooxygenase activity
Pg_S4893.15	PgGF14-15	GO:0043581	Biological process	mycelium development
Pg_S4893.15	PgGF14-15	GO:0035308	Biological process	negative regulation of protein dephosphorylation
Pg_S4893.15	PgGF14-15	GO:0051436	Biological process	negative regulation of ubiquitin-protein ligase activity involved in mitotic cell cycle
Pg_S4893.15	PgGF14-15	GO:0001764	Biological process	neuron migration
Pg_S4893.15	PgGF14-15	GO:0048011	Biological process	neurotrophin TRK receptor signaling pathway
Pg_S4893.15	PgGF14-15	GO:0005635	Cellular component	nuclear envelope
Pg_S4893.15	PgGF14-15	GO:0004623	Molecular function	phospholipase A2 activity
Pg_S4893.15	PgGF14-15	GO:0050815	Molecular function	phosphoserine binding
Pg_S4893.15	PgGF14-15	GO:0005886	Cellular component	plasma membrane
Pg_S4893.15	PgGF14-15	GO:0009506	Cellular component	plasmodesma
Pg_S4893.15	PgGF14-15	GO:0006267	Biological process	pre-replicative complex assembly
Pg_S4893.15	PgGF14-15	GO:0032403	Molecular function	protein complex binding
Pg_S4893.15	PgGF14-15	GO:0019904	Molecular function	protein domain specific binding
Pg_S4893.15	PgGF14-15	GO:0006486	Biological process	protein glycosylation
Pg_S4893.15	PgGF14-15	GO:0008426	Molecular function	protein kinase C inhibitor activity
Pg_S4893.15	PgGF14-15	GO:0006605	Biological process	protein targeting
Pg_S4893.15	PgGF14-15	GO:0007124	Biological process	pseudohyphal growth
Pg_S4893.15	PgGF14-15	GO:0007265	Biological process	Ras protein signal transduction
Pg_S4893.15	PgGF14-15	GO:0009909	Biological process	regulation of flower development
Pg_S4893.15	PgGF14-15	GO:0061062	Biological process	regulation of nematode larval development
Pg_S4893.15	PgGF14-15	GO:0006355	Biological process	regulation of transcription, DNA-dependent
Pg_S4893.15	PgGF14-15	GO:0009737	Biological process	response to abscisic acid stimulus
Pg_S4893.15	PgGF14-15	GO:0046686	Biological process	response to cadmium ion
Pg_S4893.15	PgGF14-15	GO:0010218	Biological process	response to far red light
Pg_S4893.15	PgGF14-15	GO:0080167	Biological process	response to karrikin
Pg_S4893.15	PgGF14-15	GO:0009624	Biological process	response to nematode
Pg_S4893.15	PgGF14-15	GO:0010114	Biological process	response to red light
Pg_S4893.15	PgGF14-15	GO:0048364	Biological process	root development
Pg_S4893.15	PgGF14-15	GO:0010162	Biological process	seed dormancy process
Pg_S4893.15	PgGF14-15	GO:0009845	Biological process	seed germination
Pg_S4893.15	PgGF14-15	GO:0001402	Biological process	signal transduction involved in filamentous growth
Pg_S4893.15	PgGF14-15	GO:0009407	Biological process	toxin catabolic process
Pg_S4893.15	PgGF14-15	GO:0005774	Cellular component	vacuolar membrane
Pg_S4893.15	PgGF14-15	GO:0019048	Biological process	virus-host interaction
Pg_S5121.3	PgGF14-34	GO:0030437	Biological process	ascospore formation
Pg_S5121.3	PgGF14-34	GO:0005524	Molecular function	ATP binding
Pg_S5121.3	PgGF14-34	GO:0007411	Biological process	axon guidance
Pg_S5121.3	PgGF14-34	GO:0033267	Cellular component	axon part
Pg_S5121.3	PgGF14-34	GO:0009742	Biological process	brassinosteroid mediated signaling pathway
Pg_S5121.3	PgGF14-34	GO:0005618	Cellular component	cell wall
Pg_S5121.3	PgGF14-34	GO:0021987	Biological process	cerebral cortex development
Pg_S5121.3	PgGF14-34	GO:0009570	Cellular component	chloroplast stroma
Pg_S5121.3	PgGF14-34	GO:0005694	Cellular component	chromosome
Pg_S5121.3	PgGF14-34	GO:0005829	Cellular component	cytosol
Pg_S5121.3	PgGF14-34	GO:0008340	Biological process	determination of adult lifespan
Pg_S5121.3	PgGF14-34	GO:0006270	Biological process	DNA replication initiation
Pg_S5121.3	PgGF14-34	GO:0003688	Molecular function	DNA replication origin binding
Pg_S5121.3	PgGF14-34	GO:0009793	Biological process	embryo development ending in seed dormancy
Pg_S5121.3	PgGF14-34	GO:0006888	Biological process	ER to Golgi vesicle-mediated transport
Pg_S5121.3	PgGF14-34	GO:0048449	Biological process	floral organ formation
Pg_S5121.3	PgGF14-34	GO:0034221	Biological process	fungal-type cell wall chitin biosynthetic process
Pg_S5121.3	PgGF14-34	GO:0000086	Biological process	G2/M transition of mitotic cell cycle
Pg_S5121.3	PgGF14-34	GO:0007294	Biological process	germarium-derived oocyte fate determination
Pg_S5121.3	PgGF14-34	GO:0045172	Cellular component	germline ring canal
Pg_S5121.3	PgGF14-34	GO:0005794	Cellular component	Golgi apparatus
Pg_S5121.3	PgGF14-34	GO:0035329	Biological process	hippo signaling cascade
Pg_S5121.3	PgGF14-34	GO:0021766	Biological process	hippocampus development
Pg_S5121.3	PgGF14-34	GO:0042826	Molecular function	histone deacetylase binding
Pg_S5121.3	PgGF14-34	GO:0016570	Biological process	histone modification
Pg_S5121.3	PgGF14-34	GO:0016818	Molecular function	hydrolase activity, acting on acid anhydrides, in phosphorus-containing anhydrides
Pg_S5121.3	PgGF14-34	GO:0005871	Cellular component	kinesin complex
Pg_S5121.3	PgGF14-34	GO:0009965	Biological process	leaf morphogenesis
Pg_S5121.3	PgGF14-34	GO:0042470	Cellular component	melanosome
Pg_S5121.3	PgGF14-34	GO:0005739	Cellular component	mitochondrion
Pg_S5121.3	PgGF14-34	GO:0007095	Biological process	mitotic G2 DNA damage checkpoint
Pg_S5121.3	PgGF14-34	GO:0004497	Molecular function	monooxygenase activity
Pg_S5121.3	PgGF14-34	GO:0035308	Biological process	negative regulation of protein dephosphorylation
Pg_S5121.3	PgGF14-34	GO:0051436	Biological process	negative regulation of ubiquitin-protein ligase activity involved in mitotic cell cycle
Pg_S5121.3	PgGF14-34	GO:0001764	Biological process	neuron migration
Pg_S5121.3	PgGF14-34	GO:0048011	Biological process	neurotrophin TRK receptor signaling pathway
Pg_S5121.3	PgGF14-34	GO:0046958	Biological process	nonassociative learning
Pg_S5121.3	PgGF14-34	GO:0005635	Cellular component	nuclear envelope
Pg_S5121.3	PgGF14-34	GO:0008103	Biological process	oocyte microtubule cytoskeleton polarization
Pg_S5121.3	PgGF14-34	GO:0055114	Biological process	oxidation-reduction process
Pg_S5121.3	PgGF14-34	GO:0004623	Molecular function	phospholipase A2 activity
Pg_S5121.3	PgGF14-34	GO:0050815	Molecular function	phosphoserine binding
Pg_S5121.3	PgGF14-34	GO:0005886	Cellular component	plasma membrane
Pg_S5121.3	PgGF14-34	GO:0009506	Cellular component	plasmodesma
Pg_S5121.3	PgGF14-34	GO:0007280	Biological process	pole cell migration
Pg_S5121.3	PgGF14-34	GO:0045927	Biological process	positive regulation of growth
Pg_S5121.3	PgGF14-34	GO:0006267	Biological process	pre-replicative complex assembly
Pg_S5121.3	PgGF14-34	GO:0032403	Molecular function	protein complex binding
Pg_S5121.3	PgGF14-34	GO:0019904	Molecular function	protein domain specific binding
Pg_S5121.3	PgGF14-34	GO:0006486	Biological process	protein glycosylation
Pg_S5121.3	PgGF14-34	GO:0046982	Molecular function	protein heterodimerization activity
Pg_S5121.3	PgGF14-34	GO:0008426	Molecular function	protein kinase C inhibitor activity
Pg_S5121.3	PgGF14-34	GO:0006605	Biological process	protein targeting
Pg_S5121.3	PgGF14-34	GO:0007124	Biological process	pseudohyphal growth
Pg_S5121.3	PgGF14-34	GO:0007265	Biological process	Ras protein signal transduction
Pg_S5121.3	PgGF14-34	GO:0009909	Biological process	regulation of flower development
Pg_S5121.3	PgGF14-34	GO:0007088	Biological process	regulation of mitosis
Pg_S5121.3	PgGF14-34	GO:0061062	Biological process	regulation of nematode larval development
Pg_S5121.3	PgGF14-34	GO:0006355	Biological process	regulation of transcription, DNA-dependent
Pg_S5121.3	PgGF14-34	GO:0009737	Biological process	response to abscisic acid stimulus
Pg_S5121.3	PgGF14-34	GO:0046686	Biological process	response to cadmium ion
Pg_S5121.3	PgGF14-34	GO:0010218	Biological process	response to far red light
Pg_S5121.3	PgGF14-34	GO:0080167	Biological process	response to karrikin
Pg_S5121.3	PgGF14-34	GO:0009624	Biological process	response to nematode
Pg_S5121.3	PgGF14-34	GO:0010114	Biological process	response to red light
Pg_S5121.3	PgGF14-34	GO:0009411	Biological process	response to UV
Pg_S5121.3	PgGF14-34	GO:0048364	Biological process	root development
Pg_S5121.3	PgGF14-34	GO:0010162	Biological process	seed dormancy process
Pg_S5121.3	PgGF14-34	GO:0009845	Biological process	seed germination
Pg_S5121.3	PgGF14-34	GO:0001402	Biological process	signal transduction involved in filamentous growth
Pg_S5121.3	PgGF14-34	GO:0009407	Biological process	toxin catabolic process
Pg_S5121.3	PgGF14-34	GO:0005774	Cellular component	vacuolar membrane
Pg_S5121.3	PgGF14-34	GO:0019048	Biological process	virus-host interaction
Pg_S5121.3	PgGF14-34	GO:0048190	Biological process	wing disc dorsal/ventral pattern formation
Pg_S0049.6	PgGF14-1	GO:0006588	Biological process	activation of tryptophan 5-monooxygenase activity
Pg_S0049.6	PgGF14-1	GO:0043090	Biological process	amino acid import
Pg_S0049.6	PgGF14-1	GO:0048046	Cellular component	apoplast
Pg_S0049.6	PgGF14-1	GO:0030437	Biological process	ascospore formation
Pg_S0049.6	PgGF14-1	GO:0005524	Molecular function	ATP binding
Pg_S0049.6	PgGF14-1	GO:0009742	Biological process	brassinosteroid mediated signaling pathway
Pg_S0049.6	PgGF14-1	GO:0005618	Cellular component	cell wall
Pg_S0049.6	PgGF14-1	GO:0009570	Cellular component	chloroplast stroma
Pg_S0049.6	PgGF14-1	GO:0005829	Cellular component	cytosol
Pg_S0049.6	PgGF14-1	GO:0000077	Biological process	DNA damage checkpoint
Pg_S0049.6	PgGF14-1	GO:0006270	Biological process	DNA replication initiation
Pg_S0049.6	PgGF14-1	GO:0003688	Molecular function	DNA replication origin binding
Pg_S0049.6	PgGF14-1	GO:0009793	Biological process	embryo development ending in seed dormancy
Pg_S0049.6	PgGF14-1	GO:0006888	Biological process	ER to Golgi vesicle-mediated transport
Pg_S0049.6	PgGF14-1	GO:0048449	Biological process	floral organ formation
Pg_S0049.6	PgGF14-1	GO:0034221	Biological process	fungal-type cell wall chitin biosynthetic process
Pg_S0049.6	PgGF14-1	GO:0005977	Biological process	glycogen metabolic process
Pg_S0049.6	PgGF14-1	GO:0005794	Cellular component	Golgi apparatus
Pg_S0049.6	PgGF14-1	GO:0016570	Biological process	histone modification
Pg_S0049.6	PgGF14-1	GO:0016818	Molecular function	hydrolase activity, acting on acid anhydrides, in phosphorus-containing anhydrides
Pg_S0049.6	PgGF14-1	GO:0009965	Biological process	leaf morphogenesis
Pg_S0049.6	PgGF14-1	GO:0005739	Cellular component	mitochondrion
Pg_S0049.6	PgGF14-1	GO:0043581	Biological process	mycelium development
Pg_S0049.6	PgGF14-1	GO:0051436	Biological process	negative regulation of ubiquitin-protein ligase activity involved in mitotic cell cycle
Pg_S0049.6	PgGF14-1	GO:0005635	Cellular component	nuclear envelope
Pg_S0049.6	PgGF14-1	GO:0004623	Molecular function	phospholipase A2 activity
Pg_S0049.6	PgGF14-1	GO:0050815	Molecular function	phosphoserine binding
Pg_S0049.6	PgGF14-1	GO:0005886	Cellular component	plasma membrane
Pg_S0049.6	PgGF14-1	GO:0009506	Cellular component	plasmodesma
Pg_S0049.6	PgGF14-1	GO:0006267	Biological process	pre-replicative complex assembly
Pg_S0049.6	PgGF14-1	GO:0019904	Molecular function	protein domain specific binding
Pg_S0049.6	PgGF14-1	GO:0006486	Biological process	protein glycosylation
Pg_S0049.6	PgGF14-1	GO:0008426	Molecular function	protein kinase C inhibitor activity
Pg_S0049.6	PgGF14-1	GO:0007124	Biological process	pseudohyphal growth
Pg_S0049.6	PgGF14-1	GO:0007265	Biological process	Ras protein signal transduction
Pg_S0049.6	PgGF14-1	GO:0009909	Biological process	regulation of flower development
Pg_S0049.6	PgGF14-1	GO:0061062	Biological process	regulation of nematode larval development
Pg_S0049.6	PgGF14-1	GO:0006355	Biological process	regulation of transcription, DNA-dependent
Pg_S0049.6	PgGF14-1	GO:0009737	Biological process	response to abscisic acid stimulus
Pg_S0049.6	PgGF14-1	GO:0046686	Biological process	response to cadmium ion
Pg_S0049.6	PgGF14-1	GO:0010218	Biological process	response to far red light
Pg_S0049.6	PgGF14-1	GO:0080167	Biological process	response to karrikin
Pg_S0049.6	PgGF14-1	GO:0009624	Biological process	response to nematode
Pg_S0049.6	PgGF14-1	GO:0010114	Biological process	response to red light
Pg_S0049.6	PgGF14-1	GO:0048364	Biological process	root development
Pg_S0049.6	PgGF14-1	GO:0010162	Biological process	seed dormancy process
Pg_S0049.6	PgGF14-1	GO:0009845	Biological process	seed germination
Pg_S0049.6	PgGF14-1	GO:0001402	Biological process	signal transduction involved in filamentous growth
Pg_S0049.6	PgGF14-1	GO:0009407	Biological process	toxin catabolic process
Pg_S0049.6	PgGF14-1	GO:0005774	Cellular component	vacuolar membrane
Pg_S0061.54	PgGF14-29	GO:0006915	Biological process	apoptotic process
Pg_S0061.54	PgGF14-29	GO:0030437	Biological process	ascospore formation
Pg_S0061.54	PgGF14-29	GO:0005524	Molecular function	ATP binding
Pg_S0061.54	PgGF14-29	GO:0007411	Biological process	axon guidance
Pg_S0061.54	PgGF14-29	GO:0033267	Cellular component	axon part
Pg_S0061.54	PgGF14-29	GO:0009742	Biological process	brassinosteroid mediated signaling pathway
Pg_S0061.54	PgGF14-29	GO:0005509	Molecular function	calcium ion binding
Pg_S0061.54	PgGF14-29	GO:0005618	Cellular component	cell wall
Pg_S0061.54	PgGF14-29	GO:0021987	Biological process	cerebral cortex development
Pg_S0061.54	PgGF14-29	GO:0009570	Cellular component	chloroplast stroma
Pg_S0061.54	PgGF14-29	GO:0005694	Cellular component	chromosome
Pg_S0061.54	PgGF14-29	GO:0019344	Biological process	cysteine biosynthetic process
Pg_S0061.54	PgGF14-29	GO:0005829	Cellular component	cytosol
Pg_S0061.54	PgGF14-29	GO:0008340	Biological process	determination of adult lifespan
Pg_S0061.54	PgGF14-29	GO:0006270	Biological process	DNA replication initiation
Pg_S0061.54	PgGF14-29	GO:0003688	Molecular function	DNA replication origin binding
Pg_S0061.54	PgGF14-29	GO:0034221	Biological process	fungal-type cell wall chitin biosynthetic process
Pg_S0061.54	PgGF14-29	GO:0000086	Biological process	G2/M transition of mitotic cell cycle
Pg_S0061.54	PgGF14-29	GO:0007294	Biological process	germarium-derived oocyte fate determination
Pg_S0061.54	PgGF14-29	GO:0045172	Cellular component	germline ring canal
Pg_S0061.54	PgGF14-29	GO:0005977	Biological process	glycogen metabolic process
Pg_S0061.54	PgGF14-29	GO:0006096	Biological process	glycolysis
Pg_S0061.54	PgGF14-29	GO:0007030	Biological process	Golgi organization
Pg_S0061.54	PgGF14-29	GO:0035329	Biological process	hippo signaling cascade
Pg_S0061.54	PgGF14-29	GO:0021766	Biological process	hippocampus development
Pg_S0061.54	PgGF14-29	GO:0042826	Molecular function	histone deacetylase binding
Pg_S0061.54	PgGF14-29	GO:0042744	Biological process	hydrogen peroxide catabolic process
Pg_S0061.54	PgGF14-29	GO:0016818	Molecular function	hydrolase activity, acting on acid anhydrides, in phosphorus-containing anhydrides
Pg_S0061.54	PgGF14-29	GO:0006972	Biological process	hyperosmotic response
Pg_S0061.54	PgGF14-29	GO:0019288	Biological process	isopentenyl diphosphate biosynthetic process, mevalonate-independent pathway
Pg_S0061.54	PgGF14-29	GO:0005871	Cellular component	kinesin complex
Pg_S0061.54	PgGF14-29	GO:0048366	Biological process	leaf development
Pg_S0061.54	PgGF14-29	GO:0042470	Cellular component	melanosome
Pg_S0061.54	PgGF14-29	GO:0005739	Cellular component	mitochondrion
Pg_S0061.54	PgGF14-29	GO:0007095	Biological process	mitotic G2 DNA damage checkpoint
Pg_S0061.54	PgGF14-29	GO:0004497	Molecular function	monooxygenase activity
Pg_S0061.54	PgGF14-29	GO:0043581	Biological process	mycelium development
Pg_S0061.54	PgGF14-29	GO:0035308	Biological process	negative regulation of protein dephosphorylation
Pg_S0061.54	PgGF14-29	GO:0051436	Biological process	negative regulation of ubiquitin-protein ligase activity involved in mitotic cell cycle
Pg_S0061.54	PgGF14-29	GO:0001764	Biological process	neuron migration
Pg_S0061.54	PgGF14-29	GO:0048011	Biological process	neurotrophin TRK receptor signaling pathway
Pg_S0061.54	PgGF14-29	GO:0046958	Biological process	nonassociative learning
Pg_S0061.54	PgGF14-29	GO:0005635	Cellular component	nuclear envelope
Pg_S0061.54	PgGF14-29	GO:0008103	Biological process	oocyte microtubule cytoskeleton polarization
Pg_S0061.54	PgGF14-29	GO:0050815	Molecular function	phosphoserine binding
Pg_S0061.54	PgGF14-29	GO:0005886	Cellular component	plasma membrane
Pg_S0061.54	PgGF14-29	GO:0009506	Cellular component	plasmodesma
Pg_S0061.54	PgGF14-29	GO:0007280	Biological process	pole cell migration
Pg_S0061.54	PgGF14-29	GO:0045927	Biological process	positive regulation of growth
Pg_S0061.54	PgGF14-29	GO:0048528	Biological process	post-embryonic root development
Pg_S0061.54	PgGF14-29	GO:0006267	Biological process	pre-replicative complex assembly
Pg_S0061.54	PgGF14-29	GO:0032403	Molecular function	protein complex binding
Pg_S0061.54	PgGF14-29	GO:0019904	Molecular function	protein domain specific binding
Pg_S0061.54	PgGF14-29	GO:0046982	Molecular function	protein heterodimerization activity
Pg_S0061.54	PgGF14-29	GO:0008426	Molecular function	protein kinase C inhibitor activity
Pg_S0061.54	PgGF14-29	GO:0006605	Biological process	protein targeting
Pg_S0061.54	PgGF14-29	GO:0007124	Biological process	pseudohyphal growth
Pg_S0061.54	PgGF14-29	GO:0007265	Biological process	Ras protein signal transduction
Pg_S0061.54	PgGF14-29	GO:0007088	Biological process	regulation of mitosis
Pg_S0061.54	PgGF14-29	GO:0032880	Biological process	regulation of protein localization
Pg_S0061.54	PgGF14-29	GO:0006355	Biological process	regulation of transcription, DNA-dependent
Pg_S0061.54	PgGF14-29	GO:0009737	Biological process	response to abscisic acid stimulus
Pg_S0061.54	PgGF14-29	GO:0046686	Biological process	response to cadmium ion
Pg_S0061.54	PgGF14-29	GO:0009750	Biological process	response to fructose stimulus
Pg_S0061.54	PgGF14-29	GO:0009651	Biological process	response to salt stress
Pg_S0061.54	PgGF14-29	GO:0009266	Biological process	response to temperature stimulus
Pg_S0061.54	PgGF14-29	GO:0009411	Biological process	response to UV
Pg_S0061.54	PgGF14-29	GO:0001402	Biological process	signal transduction involved in filamentous growth
Pg_S0061.54	PgGF14-29	GO:0019048	Biological process	virus-host interaction
Pg_S0061.54	PgGF14-29	GO:0006833	Biological process	water transport
Pg_S0061.54	PgGF14-29	GO:0048190	Biological process	wing disc dorsal/ventral pattern formation
Pg_S0105.3	PgGF14-6	GO:0006588	Biological process	activation of tryptophan 5-monooxygenase activity
Pg_S0105.3	PgGF14-6	GO:0043090	Biological process	amino acid import
Pg_S0105.3	PgGF14-6	GO:0048046	Cellular component	apoplast
Pg_S0105.3	PgGF14-6	GO:0006915	Biological process	apoptotic process
Pg_S0105.3	PgGF14-6	GO:0030437	Biological process	ascospore formation
Pg_S0105.3	PgGF14-6	GO:0005524	Molecular function	ATP binding
Pg_S0105.3	PgGF14-6	GO:0007411	Biological process	axon guidance
Pg_S0105.3	PgGF14-6	GO:0033267	Cellular component	axon part
Pg_S0105.3	PgGF14-6	GO:0009742	Biological process	brassinosteroid mediated signaling pathway
Pg_S0105.3	PgGF14-6	GO:0005618	Cellular component	cell wall
Pg_S0105.3	PgGF14-6	GO:0021987	Biological process	cerebral cortex development
Pg_S0105.3	PgGF14-6	GO:0009570	Cellular component	chloroplast stroma
Pg_S0105.3	PgGF14-6	GO:0005694	Cellular component	chromosome
Pg_S0105.3	PgGF14-6	GO:0005829	Cellular component	cytosol
Pg_S0105.3	PgGF14-6	GO:0008340	Biological process	determination of adult lifespan
Pg_S0105.3	PgGF14-6	GO:0006270	Biological process	DNA replication initiation
Pg_S0105.3	PgGF14-6	GO:0003688	Molecular function	DNA replication origin binding
Pg_S0105.3	PgGF14-6	GO:0009793	Biological process	embryo development ending in seed dormancy
Pg_S0105.3	PgGF14-6	GO:0006888	Biological process	ER to Golgi vesicle-mediated transport
Pg_S0105.3	PgGF14-6	GO:0048449	Biological process	floral organ formation
Pg_S0105.3	PgGF14-6	GO:0034221	Biological process	fungal-type cell wall chitin biosynthetic process
Pg_S0105.3	PgGF14-6	GO:0000086	Biological process	G2/M transition of mitotic cell cycle
Pg_S0105.3	PgGF14-6	GO:0007294	Biological process	germarium-derived oocyte fate determination
Pg_S0105.3	PgGF14-6	GO:0045172	Cellular component	germline ring canal
Pg_S0105.3	PgGF14-6	GO:0005977	Biological process	glycogen metabolic process
Pg_S0105.3	PgGF14-6	GO:0005794	Cellular component	Golgi apparatus
Pg_S0105.3	PgGF14-6	GO:0035329	Biological process	hippo signaling cascade
Pg_S0105.3	PgGF14-6	GO:0021766	Biological process	hippocampus development
Pg_S0105.3	PgGF14-6	GO:0042826	Molecular function	histone deacetylase binding
Pg_S0105.3	PgGF14-6	GO:0016570	Biological process	histone modification
Pg_S0105.3	PgGF14-6	GO:0016818	Molecular function	hydrolase activity, acting on acid anhydrides, in phosphorus-containing anhydrides
Pg_S0105.3	PgGF14-6	GO:0005871	Cellular component	kinesin complex
Pg_S0105.3	PgGF14-6	GO:0009965	Biological process	leaf morphogenesis
Pg_S0105.3	PgGF14-6	GO:0042470	Cellular component	melanosome
Pg_S0105.3	PgGF14-6	GO:0005739	Cellular component	mitochondrion
Pg_S0105.3	PgGF14-6	GO:0007095	Biological process	mitotic G2 DNA damage checkpoint
Pg_S0105.3	PgGF14-6	GO:0004497	Molecular function	monooxygenase activity
Pg_S0105.3	PgGF14-6	GO:0043581	Biological process	mycelium development
Pg_S0105.3	PgGF14-6	GO:0035308	Biological process	negative regulation of protein dephosphorylation
Pg_S0105.3	PgGF14-6	GO:0051436	Biological process	negative regulation of ubiquitin-protein ligase activity involved in mitotic cell cycle
Pg_S0105.3	PgGF14-6	GO:0001764	Biological process	neuron migration
Pg_S0105.3	PgGF14-6	GO:0048011	Biological process	neurotrophin TRK receptor signaling pathway
Pg_S0105.3	PgGF14-6	GO:0046958	Biological process	nonassociative learning
Pg_S0105.3	PgGF14-6	GO:0005635	Cellular component	nuclear envelope
Pg_S0105.3	PgGF14-6	GO:0008103	Biological process	oocyte microtubule cytoskeleton polarization
Pg_S0105.3	PgGF14-6	GO:0004623	Molecular function	phospholipase A2 activity
Pg_S0105.3	PgGF14-6	GO:0050815	Molecular function	phosphoserine binding
Pg_S0105.3	PgGF14-6	GO:0005886	Cellular component	plasma membrane
Pg_S0105.3	PgGF14-6	GO:0009506	Cellular component	plasmodesma
Pg_S0105.3	PgGF14-6	GO:0007280	Biological process	pole cell migration
Pg_S0105.3	PgGF14-6	GO:0045927	Biological process	positive regulation of growth
Pg_S0105.3	PgGF14-6	GO:0006267	Biological process	pre-replicative complex assembly
Pg_S0105.3	PgGF14-6	GO:0032403	Molecular function	protein complex binding
Pg_S0105.3	PgGF14-6	GO:0019904	Molecular function	protein domain specific binding
Pg_S0105.3	PgGF14-6	GO:0006486	Biological process	protein glycosylation
Pg_S0105.3	PgGF14-6	GO:0046982	Molecular function	protein heterodimerization activity
Pg_S0105.3	PgGF14-6	GO:0008426	Molecular function	protein kinase C inhibitor activity
Pg_S0105.3	PgGF14-6	GO:0006605	Biological process	protein targeting
Pg_S0105.3	PgGF14-6	GO:0007124	Biological process	pseudohyphal growth
Pg_S0105.3	PgGF14-6	GO:0007265	Biological process	Ras protein signal transduction
Pg_S0105.3	PgGF14-6	GO:0009909	Biological process	regulation of flower development
Pg_S0105.3	PgGF14-6	GO:0007088	Biological process	regulation of mitosis
Pg_S0105.3	PgGF14-6	GO:0061062	Biological process	regulation of nematode larval development
Pg_S0105.3	PgGF14-6	GO:0006355	Biological process	regulation of transcription, DNA-dependent
Pg_S0105.3	PgGF14-6	GO:0009737	Biological process	response to abscisic acid stimulus
Pg_S0105.3	PgGF14-6	GO:0046686	Biological process	response to cadmium ion
Pg_S0105.3	PgGF14-6	GO:0010218	Biological process	response to far red light
Pg_S0105.3	PgGF14-6	GO:0080167	Biological process	response to karrikin
Pg_S0105.3	PgGF14-6	GO:0009624	Biological process	response to nematode
Pg_S0105.3	PgGF14-6	GO:0010114	Biological process	response to red light
Pg_S0105.3	PgGF14-6	GO:0009411	Biological process	response to UV
Pg_S0105.3	PgGF14-6	GO:0048364	Biological process	root development
Pg_S0105.3	PgGF14-6	GO:0010162	Biological process	seed dormancy process
Pg_S0105.3	PgGF14-6	GO:0009845	Biological process	seed germination
Pg_S0105.3	PgGF14-6	GO:0001402	Biological process	signal transduction involved in filamentous growth
Pg_S0105.3	PgGF14-6	GO:0009407	Biological process	toxin catabolic process
Pg_S0105.3	PgGF14-6	GO:0005774	Cellular component	vacuolar membrane
Pg_S0105.3	PgGF14-6	GO:0019048	Biological process	virus-host interaction
Pg_S0105.3	PgGF14-6	GO:0048190	Biological process	wing disc dorsal/ventral pattern formation
Pg_S0146.2	PgGF14-13	GO:0006588	Biological process	activation of tryptophan 5-monooxygenase activity
Pg_S0146.2	PgGF14-13	GO:0043090	Biological process	amino acid import
Pg_S0146.2	PgGF14-13	GO:0048046	Cellular component	apoplast
Pg_S0146.2	PgGF14-13	GO:0006915	Biological process	apoptotic process
Pg_S0146.2	PgGF14-13	GO:0030437	Biological process	ascospore formation
Pg_S0146.2	PgGF14-13	GO:0005524	Molecular function	ATP binding
Pg_S0146.2	PgGF14-13	GO:0007411	Biological process	axon guidance
Pg_S0146.2	PgGF14-13	GO:0033267	Cellular component	axon part
Pg_S0146.2	PgGF14-13	GO:0009742	Biological process	brassinosteroid mediated signaling pathway
Pg_S0146.2	PgGF14-13	GO:0005618	Cellular component	cell wall
Pg_S0146.2	PgGF14-13	GO:0021987	Biological process	cerebral cortex development
Pg_S0146.2	PgGF14-13	GO:0009570	Cellular component	chloroplast stroma
Pg_S0146.2	PgGF14-13	GO:0005694	Cellular component	chromosome
Pg_S0146.2	PgGF14-13	GO:0005829	Cellular component	cytosol
Pg_S0146.2	PgGF14-13	GO:0008340	Biological process	determination of adult lifespan
Pg_S0146.2	PgGF14-13	GO:0006270	Biological process	DNA replication initiation
Pg_S0146.2	PgGF14-13	GO:0003688	Molecular function	DNA replication origin binding
Pg_S0146.2	PgGF14-13	GO:0009793	Biological process	embryo development ending in seed dormancy
Pg_S0146.2	PgGF14-13	GO:0006888	Biological process	ER to Golgi vesicle-mediated transport
Pg_S0146.2	PgGF14-13	GO:0048449	Biological process	floral organ formation
Pg_S0146.2	PgGF14-13	GO:0034221	Biological process	fungal-type cell wall chitin biosynthetic process
Pg_S0146.2	PgGF14-13	GO:0000086	Biological process	G2/M transition of mitotic cell cycle
Pg_S0146.2	PgGF14-13	GO:0007294	Biological process	germarium-derived oocyte fate determination
Pg_S0146.2	PgGF14-13	GO:0045172	Cellular component	germline ring canal
Pg_S0146.2	PgGF14-13	GO:0005977	Biological process	glycogen metabolic process
Pg_S0146.2	PgGF14-13	GO:0005794	Cellular component	Golgi apparatus
Pg_S0146.2	PgGF14-13	GO:0035329	Biological process	hippo signaling cascade
Pg_S0146.2	PgGF14-13	GO:0021766	Biological process	hippocampus development
Pg_S0146.2	PgGF14-13	GO:0042826	Molecular function	histone deacetylase binding
Pg_S0146.2	PgGF14-13	GO:0016570	Biological process	histone modification
Pg_S0146.2	PgGF14-13	GO:0016818	Molecular function	hydrolase activity, acting on acid anhydrides, in phosphorus-containing anhydrides
Pg_S0146.2	PgGF14-13	GO:0005871	Cellular component	kinesin complex
Pg_S0146.2	PgGF14-13	GO:0009965	Biological process	leaf morphogenesis
Pg_S0146.2	PgGF14-13	GO:0042470	Cellular component	melanosome
Pg_S0146.2	PgGF14-13	GO:0005739	Cellular component	mitochondrion
Pg_S0146.2	PgGF14-13	GO:0007095	Biological process	mitotic G2 DNA damage checkpoint
Pg_S0146.2	PgGF14-13	GO:0004497	Molecular function	monooxygenase activity
Pg_S0146.2	PgGF14-13	GO:0043581	Biological process	mycelium development
Pg_S0146.2	PgGF14-13	GO:0035308	Biological process	negative regulation of protein dephosphorylation
Pg_S0146.2	PgGF14-13	GO:0051436	Biological process	negative regulation of ubiquitin-protein ligase activity involved in mitotic cell cycle
Pg_S0146.2	PgGF14-13	GO:0001764	Biological process	neuron migration
Pg_S0146.2	PgGF14-13	GO:0048011	Biological process	neurotrophin TRK receptor signaling pathway
Pg_S0146.2	PgGF14-13	GO:0046958	Biological process	nonassociative learning
Pg_S0146.2	PgGF14-13	GO:0005635	Cellular component	nuclear envelope
Pg_S0146.2	PgGF14-13	GO:0008103	Biological process	oocyte microtubule cytoskeleton polarization
Pg_S0146.2	PgGF14-13	GO:0004623	Molecular function	phospholipase A2 activity
Pg_S0146.2	PgGF14-13	GO:0050815	Molecular function	phosphoserine binding
Pg_S0146.2	PgGF14-13	GO:0005886	Cellular component	plasma membrane
Pg_S0146.2	PgGF14-13	GO:0009506	Cellular component	plasmodesma
Pg_S0146.2	PgGF14-13	GO:0007280	Biological process	pole cell migration
Pg_S0146.2	PgGF14-13	GO:0045927	Biological process	positive regulation of growth
Pg_S0146.2	PgGF14-13	GO:0006267	Biological process	pre-replicative complex assembly
Pg_S0146.2	PgGF14-13	GO:0032403	Molecular function	protein complex binding
Pg_S0146.2	PgGF14-13	GO:0019904	Molecular function	protein domain specific binding
Pg_S0146.2	PgGF14-13	GO:0006486	Biological process	protein glycosylation
Pg_S0146.2	PgGF14-13	GO:0046982	Molecular function	protein heterodimerization activity
Pg_S0146.2	PgGF14-13	GO:0008426	Molecular function	protein kinase C inhibitor activity
Pg_S0146.2	PgGF14-13	GO:0006605	Biological process	protein targeting
Pg_S0146.2	PgGF14-13	GO:0007124	Biological process	pseudohyphal growth
Pg_S0146.2	PgGF14-13	GO:0007265	Biological process	Ras protein signal transduction
Pg_S0146.2	PgGF14-13	GO:0009909	Biological process	regulation of flower development
Pg_S0146.2	PgGF14-13	GO:0007088	Biological process	regulation of mitosis
Pg_S0146.2	PgGF14-13	GO:0061062	Biological process	regulation of nematode larval development
Pg_S0146.2	PgGF14-13	GO:0006355	Biological process	regulation of transcription, DNA-dependent
Pg_S0146.2	PgGF14-13	GO:0009737	Biological process	response to abscisic acid stimulus
Pg_S0146.2	PgGF14-13	GO:0046686	Biological process	response to cadmium ion
Pg_S0146.2	PgGF14-13	GO:0010218	Biological process	response to far red light
Pg_S0146.2	PgGF14-13	GO:0080167	Biological process	response to karrikin
Pg_S0146.2	PgGF14-13	GO:0009624	Biological process	response to nematode
Pg_S0146.2	PgGF14-13	GO:0010114	Biological process	response to red light
Pg_S0146.2	PgGF14-13	GO:0009411	Biological process	response to UV
Pg_S0146.2	PgGF14-13	GO:0048364	Biological process	root development
Pg_S0146.2	PgGF14-13	GO:0010162	Biological process	seed dormancy process
Pg_S0146.2	PgGF14-13	GO:0009845	Biological process	seed germination
Pg_S0146.2	PgGF14-13	GO:0001402	Biological process	signal transduction involved in filamentous growth
Pg_S0146.2	PgGF14-13	GO:0009407	Biological process	toxin catabolic process
Pg_S0146.2	PgGF14-13	GO:0005774	Cellular component	vacuolar membrane
Pg_S0146.2	PgGF14-13	GO:0019048	Biological process	virus-host interaction
Pg_S0146.2	PgGF14-13	GO:0048190	Biological process	wing disc dorsal/ventral pattern formation
Pg_S0207.2	PgGF14-11	GO:0006588	Biological process	activation of tryptophan 5-monooxygenase activity
Pg_S0207.2	PgGF14-11	GO:0043090	Biological process	amino acid import
Pg_S0207.2	PgGF14-11	GO:0048046	Cellular component	apoplast
Pg_S0207.2	PgGF14-11	GO:0006915	Biological process	apoptotic process
Pg_S0207.2	PgGF14-11	GO:0005524	Molecular function	ATP binding
Pg_S0207.2	PgGF14-11	GO:0033267	Cellular component	axon part
Pg_S0207.2	PgGF14-11	GO:0009742	Biological process	brassinosteroid mediated signaling pathway
Pg_S0207.2	PgGF14-11	GO:0009986	Cellular component	cell surface
Pg_S0207.2	PgGF14-11	GO:0071216	Biological process	cellular response to biotic stimulus
Pg_S0207.2	PgGF14-11	GO:0034605	Biological process	cellular response to heat
Pg_S0207.2	PgGF14-11	GO:0036244	Biological process	cellular response to neutral pH
Pg_S0207.2	PgGF14-11	GO:0021987	Biological process	cerebral cortex development
Pg_S0207.2	PgGF14-11	GO:0001410	Biological process	chlamydospore formation
Pg_S0207.2	PgGF14-11	GO:0009570	Cellular component	chloroplast stroma
Pg_S0207.2	PgGF14-11	GO:0005829	Cellular component	cytosol
Pg_S0207.2	PgGF14-11	GO:0000077	Biological process	DNA damage checkpoint
Pg_S0207.2	PgGF14-11	GO:0009793	Biological process	embryo development ending in seed dormancy
Pg_S0207.2	PgGF14-11	GO:0006888	Biological process	ER to Golgi vesicle-mediated transport
Pg_S0207.2	PgGF14-11	GO:0036180	Biological process	filamentous growth of a population of unicellular organisms in response to biotic stimulus
Pg_S0207.2	PgGF14-11	GO:0036168	Biological process	filamentous growth of a population of unicellular organisms in response to heat
Pg_S0207.2	PgGF14-11	GO:0036178	Biological process	filamentous growth of a population of unicellular organisms in response to neutral pH
Pg_S0207.2	PgGF14-11	GO:0048449	Biological process	floral organ formation
Pg_S0207.2	PgGF14-11	GO:0000086	Biological process	G2/M transition of mitotic cell cycle
Pg_S0207.2	PgGF14-11	GO:0005794	Cellular component	Golgi apparatus
Pg_S0207.2	PgGF14-11	GO:0035329	Biological process	hippo signaling cascade
Pg_S0207.2	PgGF14-11	GO:0021766	Biological process	hippocampus development
Pg_S0207.2	PgGF14-11	GO:0042826	Molecular function	histone deacetylase binding
Pg_S0207.2	PgGF14-11	GO:0016570	Biological process	histone modification
Pg_S0207.2	PgGF14-11	GO:0016818	Molecular function	hydrolase activity, acting on acid anhydrides, in phosphorus-containing anhydrides
Pg_S0207.2	PgGF14-11	GO:0005871	Cellular component	kinesin complex
Pg_S0207.2	PgGF14-11	GO:0009965	Biological process	leaf morphogenesis
Pg_S0207.2	PgGF14-11	GO:0005739	Cellular component	mitochondrion
Pg_S0207.2	PgGF14-11	GO:0004497	Molecular function	monooxygenase activity
Pg_S0207.2	PgGF14-11	GO:0035308	Biological process	negative regulation of protein dephosphorylation
Pg_S0207.2	PgGF14-11	GO:0001764	Biological process	neuron migration
Pg_S0207.2	PgGF14-11	GO:0048011	Biological process	neurotrophin TRK receptor signaling pathway
Pg_S0207.2	PgGF14-11	GO:0005635	Cellular component	nuclear envelope
Pg_S0207.2	PgGF14-11	GO:0009405	Biological process	pathogenesis
Pg_S0207.2	PgGF14-11	GO:0004623	Molecular function	phospholipase A2 activity
Pg_S0207.2	PgGF14-11	GO:0050815	Molecular function	phosphoserine binding
Pg_S0207.2	PgGF14-11	GO:0005886	Cellular component	plasma membrane
Pg_S0207.2	PgGF14-11	GO:0009506	Cellular component	plasmodesma
Pg_S0207.2	PgGF14-11	GO:1900445	Biological process	positive regulation of filamentous growth of a population of unicellular organisms in response to biotic stimulus
Pg_S0207.2	PgGF14-11	GO:1900442	Biological process	positive regulation of filamentous growth of a population of unicellular organisms in response to neutral pH
Pg_S0207.2	PgGF14-11	GO:0032403	Molecular function	protein complex binding
Pg_S0207.2	PgGF14-11	GO:0019904	Molecular function	protein domain specific binding
Pg_S0207.2	PgGF14-11	GO:0006486	Biological process	protein glycosylation
Pg_S0207.2	PgGF14-11	GO:0008426	Molecular function	protein kinase C inhibitor activity
Pg_S0207.2	PgGF14-11	GO:0006605	Biological process	protein targeting
Pg_S0207.2	PgGF14-11	GO:0006109	Biological process	regulation of carbohydrate metabolic process
Pg_S0207.2	PgGF14-11	GO:0009909	Biological process	regulation of flower development
Pg_S0207.2	PgGF14-11	GO:0061062	Biological process	regulation of nematode larval development
Pg_S0207.2	PgGF14-11	GO:0006355	Biological process	regulation of transcription, DNA-dependent
Pg_S0207.2	PgGF14-11	GO:0009737	Biological process	response to abscisic acid stimulus
Pg_S0207.2	PgGF14-11	GO:0046686	Biological process	response to cadmium ion
Pg_S0207.2	PgGF14-11	GO:0010218	Biological process	response to far red light
Pg_S0207.2	PgGF14-11	GO:0080167	Biological process	response to karrikin
Pg_S0207.2	PgGF14-11	GO:0009624	Biological process	response to nematode
Pg_S0207.2	PgGF14-11	GO:0010114	Biological process	response to red light
Pg_S0207.2	PgGF14-11	GO:0048364	Biological process	root development
Pg_S0207.2	PgGF14-11	GO:0010162	Biological process	seed dormancy process
Pg_S0207.2	PgGF14-11	GO:0009845	Biological process	seed germination
Pg_S0207.2	PgGF14-11	GO:0009407	Biological process	toxin catabolic process
Pg_S0207.2	PgGF14-11	GO:0005774	Cellular component	vacuolar membrane
Pg_S0207.2	PgGF14-11	GO:0030445	Cellular component	yeast-form cell wall
Pg_S0382.5	PgGF14-2	GO:0048046	Cellular component	apoplast
Pg_S0382.5	PgGF14-2	GO:0005524	Molecular function	ATP binding
Pg_S0382.5	PgGF14-2	GO:0009742	Biological process	brassinosteroid mediated signaling pathway
Pg_S0382.5	PgGF14-2	GO:0048468	Biological process	cell development
Pg_S0382.5	PgGF14-2	GO:0005618	Cellular component	cell wall
Pg_S0382.5	PgGF14-2	GO:0034645	Biological process	cellular macromolecule biosynthetic process
Pg_S0382.5	PgGF14-2	GO:0033554	Biological process	cellular response to stress
Pg_S0382.5	PgGF14-2	GO:0009570	Cellular component	chloroplast stroma
Pg_S0382.5	PgGF14-2	GO:0005829	Cellular component	cytosol
Pg_S0382.5	PgGF14-2	GO:0003006	Biological process	developmental process involved in reproduction
Pg_S0382.5	PgGF14-2	GO:0019899	Molecular function	enzyme binding
Pg_S0382.5	PgGF14-2	GO:0044182	Biological process	filamentous growth of a population of unicellular organisms
Pg_S0382.5	PgGF14-2	GO:0005794	Cellular component	Golgi apparatus
Pg_S0382.5	PgGF14-2	GO:0048366	Biological process	leaf development
Pg_S0382.5	PgGF14-2	GO:0051179	Biological process	localization
Pg_S0382.5	PgGF14-2	GO:0005739	Cellular component	mitochondrion
Pg_S0382.5	PgGF14-2	GO:0006807	Biological process	nitrogen compound metabolic process
Pg_S0382.5	PgGF14-2	GO:0005635	Cellular component	nuclear envelope
Pg_S0382.5	PgGF14-2	GO:0005886	Cellular component	plasma membrane
Pg_S0382.5	PgGF14-2	GO:0009506	Cellular component	plasmodesma
Pg_S0382.5	PgGF14-2	GO:1900430	Biological process	positive regulation of filamentous growth of a population of unicellular organisms
Pg_S0382.5	PgGF14-2	GO:0048584	Biological process	positive regulation of response to stimulus
Pg_S0382.5	PgGF14-2	GO:0009791	Biological process	post-embryonic development
Pg_S0382.5	PgGF14-2	GO:0044238	Biological process	primary metabolic process
Pg_S0382.5	PgGF14-2	GO:0045309	Molecular function	protein phosphorylated amino acid binding
Pg_S0382.5	PgGF14-2	GO:0061062	Biological process	regulation of nematode larval development
Pg_S0382.5	PgGF14-2	GO:0080090	Biological process	regulation of primary metabolic process
Pg_S0382.5	PgGF14-2	GO:0046686	Biological process	response to cadmium ion
Pg_S0382.5	PgGF14-2	GO:0010218	Biological process	response to far red light
Pg_S0382.5	PgGF14-2	GO:0009408	Biological process	response to heat
Pg_S0382.5	PgGF14-2	GO:0080167	Biological process	response to karrikin
Pg_S0382.5	PgGF14-2	GO:0009624	Biological process	response to nematode
Pg_S0382.5	PgGF14-2	GO:0036176	Biological process	response to neutral pH
Pg_S0382.5	PgGF14-2	GO:0010114	Biological process	response to red light
Pg_S0382.5	PgGF14-2	GO:0048364	Biological process	root development
Pg_S0382.5	PgGF14-2	GO:0044710	Biological process	single-organism metabolic process
Pg_S0382.5	PgGF14-2	GO:0030435	Biological process	sporulation resulting in formation of a cellular spore
Pg_S0382.5	PgGF14-2	GO:0005774	Cellular component	vacuolar membrane
Pg_S0399.53	PgGF14-38	GO:0043090	Biological process	amino acid import
Pg_S0399.53	PgGF14-38	GO:0048046	Cellular component	apoplast
Pg_S0399.53	PgGF14-38	GO:0030437	Biological process	ascospore formation
Pg_S0399.53	PgGF14-38	GO:0005524	Molecular function	ATP binding
Pg_S0399.53	PgGF14-38	GO:0007411	Biological process	axon guidance
Pg_S0399.53	PgGF14-38	GO:0009742	Biological process	brassinosteroid mediated signaling pathway
Pg_S0399.53	PgGF14-38	GO:0009986	Cellular component	cell surface
Pg_S0399.53	PgGF14-38	GO:0071216	Biological process	cellular response to biotic stimulus
Pg_S0399.53	PgGF14-38	GO:0034605	Biological process	cellular response to heat
Pg_S0399.53	PgGF14-38	GO:0036244	Biological process	cellular response to neutral pH
Pg_S0399.53	PgGF14-38	GO:0001410	Biological process	chlamydospore formation
Pg_S0399.53	PgGF14-38	GO:0009570	Cellular component	chloroplast stroma
Pg_S0399.53	PgGF14-38	GO:0005694	Cellular component	chromosome
Pg_S0399.53	PgGF14-38	GO:0005829	Cellular component	cytosol
Pg_S0399.53	PgGF14-38	GO:0008340	Biological process	determination of adult lifespan
Pg_S0399.53	PgGF14-38	GO:0006270	Biological process	DNA replication initiation
Pg_S0399.53	PgGF14-38	GO:0003688	Molecular function	DNA replication origin binding
Pg_S0399.53	PgGF14-38	GO:0009793	Biological process	embryo development ending in seed dormancy
Pg_S0399.53	PgGF14-38	GO:0006888	Biological process	ER to Golgi vesicle-mediated transport
Pg_S0399.53	PgGF14-38	GO:0036180	Biological process	filamentous growth of a population of unicellular organisms in response to biotic stimulus
Pg_S0399.53	PgGF14-38	GO:0036168	Biological process	filamentous growth of a population of unicellular organisms in response to heat
Pg_S0399.53	PgGF14-38	GO:0036178	Biological process	filamentous growth of a population of unicellular organisms in response to neutral pH
Pg_S0399.53	PgGF14-38	GO:0048449	Biological process	floral organ formation
Pg_S0399.53	PgGF14-38	GO:0034221	Biological process	fungal-type cell wall chitin biosynthetic process
Pg_S0399.53	PgGF14-38	GO:0007294	Biological process	germarium-derived oocyte fate determination
Pg_S0399.53	PgGF14-38	GO:0045172	Cellular component	germline ring canal
Pg_S0399.53	PgGF14-38	GO:0005977	Biological process	glycogen metabolic process
Pg_S0399.53	PgGF14-38	GO:0005794	Cellular component	Golgi apparatus
Pg_S0399.53	PgGF14-38	GO:0016570	Biological process	histone modification
Pg_S0399.53	PgGF14-38	GO:0016818	Molecular function	hydrolase activity, acting on acid anhydrides, in phosphorus-containing anhydrides
Pg_S0399.53	PgGF14-38	GO:0009965	Biological process	leaf morphogenesis
Pg_S0399.53	PgGF14-38	GO:0005875	Cellular component	microtubule associated complex
Pg_S0399.53	PgGF14-38	GO:0005739	Cellular component	mitochondrion
Pg_S0399.53	PgGF14-38	GO:0007095	Biological process	mitotic G2 DNA damage checkpoint
Pg_S0399.53	PgGF14-38	GO:0043581	Biological process	mycelium development
Pg_S0399.53	PgGF14-38	GO:0051436	Biological process	negative regulation of ubiquitin-protein ligase activity involved in mitotic cell cycle
Pg_S0399.53	PgGF14-38	GO:0046958	Biological process	nonassociative learning
Pg_S0399.53	PgGF14-38	GO:0005635	Cellular component	nuclear envelope
Pg_S0399.53	PgGF14-38	GO:0008103	Biological process	oocyte microtubule cytoskeleton polarization
Pg_S0399.53	PgGF14-38	GO:0009405	Biological process	pathogenesis
Pg_S0399.53	PgGF14-38	GO:0050815	Molecular function	phosphoserine binding
Pg_S0399.53	PgGF14-38	GO:0005886	Cellular component	plasma membrane
Pg_S0399.53	PgGF14-38	GO:0009506	Cellular component	plasmodesma
Pg_S0399.53	PgGF14-38	GO:0007280	Biological process	pole cell migration
Pg_S0399.53	PgGF14-38	GO:1900445	Biological process	positive regulation of filamentous growth of a population of unicellular organisms in response to biotic stimulus
Pg_S0399.53	PgGF14-38	GO:1900442	Biological process	positive regulation of filamentous growth of a population of unicellular organisms in response to neutral pH
Pg_S0399.53	PgGF14-38	GO:0006267	Biological process	pre-replicative complex assembly
Pg_S0399.53	PgGF14-38	GO:0019904	Molecular function	protein domain specific binding
Pg_S0399.53	PgGF14-38	GO:0006486	Biological process	protein glycosylation
Pg_S0399.53	PgGF14-38	GO:0046982	Molecular function	protein heterodimerization activity
Pg_S0399.53	PgGF14-38	GO:0008426	Molecular function	protein kinase C inhibitor activity
Pg_S0399.53	PgGF14-38	GO:0007124	Biological process	pseudohyphal growth
Pg_S0399.53	PgGF14-38	GO:0007265	Biological process	Ras protein signal transduction
Pg_S0399.53	PgGF14-38	GO:0006109	Biological process	regulation of carbohydrate metabolic process
Pg_S0399.53	PgGF14-38	GO:0009909	Biological process	regulation of flower development
Pg_S0399.53	PgGF14-38	GO:0007088	Biological process	regulation of mitosis
Pg_S0399.53	PgGF14-38	GO:0061062	Biological process	regulation of nematode larval development
Pg_S0399.53	PgGF14-38	GO:0006355	Biological process	regulation of transcription, DNA-dependent
Pg_S0399.53	PgGF14-38	GO:0009737	Biological process	response to abscisic acid stimulus
Pg_S0399.53	PgGF14-38	GO:0046686	Biological process	response to cadmium ion
Pg_S0399.53	PgGF14-38	GO:0010218	Biological process	response to far red light
Pg_S0399.53	PgGF14-38	GO:0080167	Biological process	response to karrikin
Pg_S0399.53	PgGF14-38	GO:0009624	Biological process	response to nematode
Pg_S0399.53	PgGF14-38	GO:0010114	Biological process	response to red light
Pg_S0399.53	PgGF14-38	GO:0009411	Biological process	response to UV
Pg_S0399.53	PgGF14-38	GO:0048364	Biological process	root development
Pg_S0399.53	PgGF14-38	GO:0010162	Biological process	seed dormancy process
Pg_S0399.53	PgGF14-38	GO:0009845	Biological process	seed germination
Pg_S0399.53	PgGF14-38	GO:0001402	Biological process	signal transduction involved in filamentous growth
Pg_S0399.53	PgGF14-38	GO:0009407	Biological process	toxin catabolic process
Pg_S0399.53	PgGF14-38	GO:0005774	Cellular component	vacuolar membrane
Pg_S0399.53	PgGF14-38	GO:0048190	Biological process	wing disc dorsal/ventral pattern formation
Pg_S0399.53	PgGF14-38	GO:0030445	Cellular component	yeast-form cell wall
Pg_S0604.6	PgGF14-10	GO:0006588	Biological process	activation of tryptophan 5-monooxygenase activity
Pg_S0604.6	PgGF14-10	GO:0043090	Biological process	amino acid import
Pg_S0604.6	PgGF14-10	GO:0048046	Cellular component	apoplast
Pg_S0604.6	PgGF14-10	GO:0006915	Biological process	apoptotic process
Pg_S0604.6	PgGF14-10	GO:0005524	Molecular function	ATP binding
Pg_S0604.6	PgGF14-10	GO:0007411	Biological process	axon guidance
Pg_S0604.6	PgGF14-10	GO:0033267	Cellular component	axon part
Pg_S0604.6	PgGF14-10	GO:0009742	Biological process	brassinosteroid mediated signaling pathway
Pg_S0604.6	PgGF14-10	GO:0009986	Cellular component	cell surface
Pg_S0604.6	PgGF14-10	GO:0071216	Biological process	cellular response to biotic stimulus
Pg_S0604.6	PgGF14-10	GO:0034605	Biological process	cellular response to heat
Pg_S0604.6	PgGF14-10	GO:0036244	Biological process	cellular response to neutral pH
Pg_S0604.6	PgGF14-10	GO:0021987	Biological process	cerebral cortex development
Pg_S0604.6	PgGF14-10	GO:0001410	Biological process	chlamydospore formation
Pg_S0604.6	PgGF14-10	GO:0009570	Cellular component	chloroplast stroma
Pg_S0604.6	PgGF14-10	GO:0005694	Cellular component	chromosome
Pg_S0604.6	PgGF14-10	GO:0005829	Cellular component	cytosol
Pg_S0604.6	PgGF14-10	GO:0008340	Biological process	determination of adult lifespan
Pg_S0604.6	PgGF14-10	GO:0009793	Biological process	embryo development ending in seed dormancy
Pg_S0604.6	PgGF14-10	GO:0006888	Biological process	ER to Golgi vesicle-mediated transport
Pg_S0604.6	PgGF14-10	GO:0036180	Biological process	filamentous growth of a population of unicellular organisms in response to biotic stimulus
Pg_S0604.6	PgGF14-10	GO:0036168	Biological process	filamentous growth of a population of unicellular organisms in response to heat
Pg_S0604.6	PgGF14-10	GO:0036178	Biological process	filamentous growth of a population of unicellular organisms in response to neutral pH
Pg_S0604.6	PgGF14-10	GO:0048449	Biological process	floral organ formation
Pg_S0604.6	PgGF14-10	GO:0000086	Biological process	G2/M transition of mitotic cell cycle
Pg_S0604.6	PgGF14-10	GO:0007294	Biological process	germarium-derived oocyte fate determination
Pg_S0604.6	PgGF14-10	GO:0045172	Cellular component	germline ring canal
Pg_S0604.6	PgGF14-10	GO:0005794	Cellular component	Golgi apparatus
Pg_S0604.6	PgGF14-10	GO:0035329	Biological process	hippo signaling cascade
Pg_S0604.6	PgGF14-10	GO:0021766	Biological process	hippocampus development
Pg_S0604.6	PgGF14-10	GO:0042826	Molecular function	histone deacetylase binding
Pg_S0604.6	PgGF14-10	GO:0016570	Biological process	histone modification
Pg_S0604.6	PgGF14-10	GO:0016818	Molecular function	hydrolase activity, acting on acid anhydrides, in phosphorus-containing anhydrides
Pg_S0604.6	PgGF14-10	GO:0005871	Cellular component	kinesin complex
Pg_S0604.6	PgGF14-10	GO:0009965	Biological process	leaf morphogenesis
Pg_S0604.6	PgGF14-10	GO:0042470	Cellular component	melanosome
Pg_S0604.6	PgGF14-10	GO:0005739	Cellular component	mitochondrion
Pg_S0604.6	PgGF14-10	GO:0007095	Biological process	mitotic G2 DNA damage checkpoint
Pg_S0604.6	PgGF14-10	GO:0004497	Molecular function	monooxygenase activity
Pg_S0604.6	PgGF14-10	GO:0035308	Biological process	negative regulation of protein dephosphorylation
Pg_S0604.6	PgGF14-10	GO:0001764	Biological process	neuron migration
Pg_S0604.6	PgGF14-10	GO:0048011	Biological process	neurotrophin TRK receptor signaling pathway
Pg_S0604.6	PgGF14-10	GO:0046958	Biological process	nonassociative learning
Pg_S0604.6	PgGF14-10	GO:0005635	Cellular component	nuclear envelope
Pg_S0604.6	PgGF14-10	GO:0008103	Biological process	oocyte microtubule cytoskeleton polarization
Pg_S0604.6	PgGF14-10	GO:0055114	Biological process	oxidation-reduction process
Pg_S0604.6	PgGF14-10	GO:0009405	Biological process	pathogenesis
Pg_S0604.6	PgGF14-10	GO:0004623	Molecular function	phospholipase A2 activity
Pg_S0604.6	PgGF14-10	GO:0050815	Molecular function	phosphoserine binding
Pg_S0604.6	PgGF14-10	GO:0005886	Cellular component	plasma membrane
Pg_S0604.6	PgGF14-10	GO:0009506	Cellular component	plasmodesma
Pg_S0604.6	PgGF14-10	GO:0007280	Biological process	pole cell migration
Pg_S0604.6	PgGF14-10	GO:1900445	Biological process	positive regulation of filamentous growth of a population of unicellular organisms in response to biotic stimulus
Pg_S0604.6	PgGF14-10	GO:1900442	Biological process	positive regulation of filamentous growth of a population of unicellular organisms in response to neutral pH
Pg_S0604.6	PgGF14-10	GO:0032403	Molecular function	protein complex binding
Pg_S0604.6	PgGF14-10	GO:0019904	Molecular function	protein domain specific binding
Pg_S0604.6	PgGF14-10	GO:0006486	Biological process	protein glycosylation
Pg_S0604.6	PgGF14-10	GO:0046982	Molecular function	protein heterodimerization activity
Pg_S0604.6	PgGF14-10	GO:0008426	Molecular function	protein kinase C inhibitor activity
Pg_S0604.6	PgGF14-10	GO:0006605	Biological process	protein targeting
Pg_S0604.6	PgGF14-10	GO:0007265	Biological process	Ras protein signal transduction
Pg_S0604.6	PgGF14-10	GO:0006109	Biological process	regulation of carbohydrate metabolic process
Pg_S0604.6	PgGF14-10	GO:0009909	Biological process	regulation of flower development
Pg_S0604.6	PgGF14-10	GO:0007088	Biological process	regulation of mitosis
Pg_S0604.6	PgGF14-10	GO:0061062	Biological process	regulation of nematode larval development
Pg_S0604.6	PgGF14-10	GO:0006355	Biological process	regulation of transcription, DNA-dependent
Pg_S0604.6	PgGF14-10	GO:0009737	Biological process	response to abscisic acid stimulus
Pg_S0604.6	PgGF14-10	GO:0046686	Biological process	response to cadmium ion
Pg_S0604.6	PgGF14-10	GO:0010218	Biological process	response to far red light
Pg_S0604.6	PgGF14-10	GO:0080167	Biological process	response to karrikin
Pg_S0604.6	PgGF14-10	GO:0009624	Biological process	response to nematode
Pg_S0604.6	PgGF14-10	GO:0010114	Biological process	response to red light
Pg_S0604.6	PgGF14-10	GO:0009411	Biological process	response to UV
Pg_S0604.6	PgGF14-10	GO:0048364	Biological process	root development
Pg_S0604.6	PgGF14-10	GO:0010162	Biological process	seed dormancy process
Pg_S0604.6	PgGF14-10	GO:0009845	Biological process	seed germination
Pg_S0604.6	PgGF14-10	GO:0009407	Biological process	toxin catabolic process
Pg_S0604.6	PgGF14-10	GO:0005774	Cellular component	vacuolar membrane
Pg_S0604.6	PgGF14-10	GO:0019048	Biological process	virus-host interaction
Pg_S0604.6	PgGF14-10	GO:0048190	Biological process	wing disc dorsal/ventral pattern formation
Pg_S0604.6	PgGF14-10	GO:0030445	Cellular component	yeast-form cell wall
Pg_S0778.7	PgGF14-3	GO:0006588	Biological process	activation of tryptophan 5-monooxygenase activity
Pg_S0778.7	PgGF14-3	GO:0043090	Biological process	amino acid import
Pg_S0778.7	PgGF14-3	GO:0048046	Cellular component	apoplast
Pg_S0778.7	PgGF14-3	GO:0009742	Biological process	brassinosteroid mediated signaling pathway
Pg_S0909.4	PgGF14-27	GO:0006588	Biological process	activation of tryptophan 5-monooxygenase activity
Pg_S0909.4	PgGF14-27	GO:0043090	Biological process	amino acid import
Pg_S0909.4	PgGF14-27	GO:0048046	Cellular component	apoplast
Pg_S0909.4	PgGF14-27	GO:0006915	Biological process	apoptotic process
Pg_S0909.4	PgGF14-27	GO:0005524	Molecular function	ATP binding
Pg_S0909.4	PgGF14-27	GO:0007411	Biological process	axon guidance
Pg_S0909.4	PgGF14-27	GO:0033267	Cellular component	axon part
Pg_S0909.4	PgGF14-27	GO:0009742	Biological process	brassinosteroid mediated signaling pathway
Pg_S0909.4	PgGF14-27	GO:0005618	Cellular component	cell wall
Pg_S0909.4	PgGF14-27	GO:0021987	Biological process	cerebral cortex development
Pg_S0909.4	PgGF14-27	GO:0009570	Cellular component	chloroplast stroma
Pg_S0909.4	PgGF14-27	GO:0005694	Cellular component	chromosome
Pg_S0909.4	PgGF14-27	GO:0005829	Cellular component	cytosol
Pg_S0909.4	PgGF14-27	GO:0008340	Biological process	determination of adult lifespan
Pg_S0909.4	PgGF14-27	GO:0009793	Biological process	embryo development ending in seed dormancy
Pg_S0909.4	PgGF14-27	GO:0006888	Biological process	ER to Golgi vesicle-mediated transport
Pg_S0909.4	PgGF14-27	GO:0048449	Biological process	floral organ formation
Pg_S0909.4	PgGF14-27	GO:0000086	Biological process	G2/M transition of mitotic cell cycle
Pg_S0909.4	PgGF14-27	GO:0007294	Biological process	germarium-derived oocyte fate determination
Pg_S0909.4	PgGF14-27	GO:0045172	Cellular component	germline ring canal
Pg_S0909.4	PgGF14-27	GO:0005794	Cellular component	Golgi apparatus
Pg_S0909.4	PgGF14-27	GO:0035329	Biological process	hippo signaling cascade
Pg_S0909.4	PgGF14-27	GO:0021766	Biological process	hippocampus development
Pg_S0909.4	PgGF14-27	GO:0042826	Molecular function	histone deacetylase binding
Pg_S0909.4	PgGF14-27	GO:0016570	Biological process	histone modification
Pg_S0909.4	PgGF14-27	GO:0016818	Molecular function	hydrolase activity, acting on acid anhydrides, in phosphorus-containing anhydrides
Pg_S0909.4	PgGF14-27	GO:0005871	Cellular component	kinesin complex
Pg_S0909.4	PgGF14-27	GO:0009965	Biological process	leaf morphogenesis
Pg_S0909.4	PgGF14-27	GO:0042470	Cellular component	melanosome
Pg_S0909.4	PgGF14-27	GO:0005739	Cellular component	mitochondrion
Pg_S0909.4	PgGF14-27	GO:0007095	Biological process	mitotic G2 DNA damage checkpoint
Pg_S0909.4	PgGF14-27	GO:0004497	Molecular function	monooxygenase activity
Pg_S0909.4	PgGF14-27	GO:0043581	Biological process	mycelium development
Pg_S0909.4	PgGF14-27	GO:0035308	Biological process	negative regulation of protein dephosphorylation
Pg_S0909.4	PgGF14-27	GO:0001764	Biological process	neuron migration
Pg_S0909.4	PgGF14-27	GO:0048011	Biological process	neurotrophin TRK receptor signaling pathway
Pg_S0909.4	PgGF14-27	GO:0046958	Biological process	nonassociative learning
Pg_S0909.4	PgGF14-27	GO:0005635	Cellular component	nuclear envelope
Pg_S0909.4	PgGF14-27	GO:0008103	Biological process	oocyte microtubule cytoskeleton polarization
Pg_S0909.4	PgGF14-27	GO:0055114	Biological process	oxidation-reduction process
Pg_S0909.4	PgGF14-27	GO:0030572	Molecular function	phosphatidyltransferase activity
Pg_S0909.4	PgGF14-27	GO:0004623	Molecular function	phospholipase A2 activity
Pg_S0909.4	PgGF14-27	GO:0008654	Biological process	phospholipid biosynthetic process
Pg_S0909.4	PgGF14-27	GO:0050815	Molecular function	phosphoserine binding
Pg_S0909.4	PgGF14-27	GO:0005886	Cellular component	plasma membrane
Pg_S0909.4	PgGF14-27	GO:0009506	Cellular component	plasmodesma
Pg_S0909.4	PgGF14-27	GO:0007280	Biological process	pole cell migration
Pg_S0909.4	PgGF14-27	GO:0045927	Biological process	positive regulation of growth
Pg_S0909.4	PgGF14-27	GO:0032403	Molecular function	protein complex binding
Pg_S0909.4	PgGF14-27	GO:0019904	Molecular function	protein domain specific binding
Pg_S0909.4	PgGF14-27	GO:0006486	Biological process	protein glycosylation
Pg_S0909.4	PgGF14-27	GO:0046982	Molecular function	protein heterodimerization activity
Pg_S0909.4	PgGF14-27	GO:0008426	Molecular function	protein kinase C inhibitor activity
Pg_S0909.4	PgGF14-27	GO:0006605	Biological process	protein targeting
Pg_S0909.4	PgGF14-27	GO:0007265	Biological process	Ras protein signal transduction
Pg_S0909.4	PgGF14-27	GO:0009909	Biological process	regulation of flower development
Pg_S0909.4	PgGF14-27	GO:0007088	Biological process	regulation of mitosis
Pg_S0909.4	PgGF14-27	GO:0061062	Biological process	regulation of nematode larval development
Pg_S0909.4	PgGF14-27	GO:0006355	Biological process	regulation of transcription, DNA-dependent
Pg_S0909.4	PgGF14-27	GO:0009737	Biological process	response to abscisic acid stimulus
Pg_S0909.4	PgGF14-27	GO:0046686	Biological process	response to cadmium ion
Pg_S0909.4	PgGF14-27	GO:0010218	Biological process	response to far red light
Pg_S0909.4	PgGF14-27	GO:0080167	Biological process	response to karrikin
Pg_S0909.4	PgGF14-27	GO:0009624	Biological process	response to nematode
Pg_S0909.4	PgGF14-27	GO:0010114	Biological process	response to red light
Pg_S0909.4	PgGF14-27	GO:0009411	Biological process	response to UV
Pg_S0909.4	PgGF14-27	GO:0048364	Biological process	root development
Pg_S0909.4	PgGF14-27	GO:0010162	Biological process	seed dormancy process
Pg_S0909.4	PgGF14-27	GO:0009845	Biological process	seed germination
Pg_S0909.4	PgGF14-27	GO:0009407	Biological process	toxin catabolic process
Pg_S0909.4	PgGF14-27	GO:0005774	Cellular component	vacuolar membrane
Pg_S0909.4	PgGF14-27	GO:0019048	Biological process	virus-host interaction
Pg_S0909.4	PgGF14-27	GO:0048190	Biological process	wing disc dorsal/ventral pattern formation
Pg_S1006.2	PgGF14-5	GO:0009560	Biological process	embryo sac egg cell differentiation
Pg_S1006.2	PgGF14-5	GO:0000741	Biological process	karyogamy
Pg_S1006.2	PgGF14-5	GO:0003676	Molecular function	nucleic acid binding
Pg_S1006.2	PgGF14-5	GO:0005634	Cellular component	nucleus
Pg_S1006.2	PgGF14-5	GO:0006606	Biological process	protein import into nucleus
Pg_S1006.2	PgGF14-5	GO:0008173	Molecular function	RNA methyltransferase activity
Pg_S1006.2	PgGF14-5	GO:0006396	Biological process	RNA processing
Pg_S1006.2	PgGF14-5	GO:0008270	Molecular function	zinc ion binding
Pg_S1029.36	PgGF14-7	GO:0006588	Biological process	activation of tryptophan 5-monooxygenase activity
Pg_S1029.36	PgGF14-7	GO:0043090	Biological process	amino acid import
Pg_S1029.36	PgGF14-7	GO:0048046	Cellular component	apoplast
Pg_S1029.36	PgGF14-7	GO:0006915	Biological process	apoptotic process
Pg_S1029.36	PgGF14-7	GO:0005524	Molecular function	ATP binding
Pg_S1029.36	PgGF14-7	GO:0033267	Cellular component	axon part
Pg_S1029.36	PgGF14-7	GO:0009742	Biological process	brassinosteroid mediated signaling pathway
Pg_S1029.36	PgGF14-7	GO:0009986	Cellular component	cell surface
Pg_S1029.36	PgGF14-7	GO:0071216	Biological process	cellular response to biotic stimulus
Pg_S1029.36	PgGF14-7	GO:0034605	Biological process	cellular response to heat
Pg_S1029.36	PgGF14-7	GO:0036244	Biological process	cellular response to neutral pH
Pg_S1029.36	PgGF14-7	GO:0021987	Biological process	cerebral cortex development
Pg_S1029.36	PgGF14-7	GO:0001410	Biological process	chlamydospore formation
Pg_S1029.36	PgGF14-7	GO:0009570	Cellular component	chloroplast stroma
Pg_S1029.36	PgGF14-7	GO:0005829	Cellular component	cytosol
Pg_S1029.36	PgGF14-7	GO:0000077	Biological process	DNA damage checkpoint
Pg_S1029.36	PgGF14-7	GO:0009793	Biological process	embryo development ending in seed dormancy
Pg_S1029.36	PgGF14-7	GO:0006888	Biological process	ER to Golgi vesicle-mediated transport
Pg_S1029.36	PgGF14-7	GO:0036180	Biological process	filamentous growth of a population of unicellular organisms in response to biotic stimulus
Pg_S1029.36	PgGF14-7	GO:0036168	Biological process	filamentous growth of a population of unicellular organisms in response to heat
Pg_S1029.36	PgGF14-7	GO:0036178	Biological process	filamentous growth of a population of unicellular organisms in response to neutral pH
Pg_S1029.36	PgGF14-7	GO:0048449	Biological process	floral organ formation
Pg_S1029.36	PgGF14-7	GO:0000086	Biological process	G2/M transition of mitotic cell cycle
Pg_S1029.36	PgGF14-7	GO:0005794	Cellular component	Golgi apparatus
Pg_S1029.36	PgGF14-7	GO:0035329	Biological process	hippo signaling cascade
Pg_S1029.36	PgGF14-7	GO:0021766	Biological process	hippocampus development
Pg_S1029.36	PgGF14-7	GO:0042826	Molecular function	histone deacetylase binding
Pg_S1029.36	PgGF14-7	GO:0016570	Biological process	histone modification
Pg_S1029.36	PgGF14-7	GO:0016818	Molecular function	hydrolase activity, acting on acid anhydrides, in phosphorus-containing anhydrides
Pg_S1029.36	PgGF14-7	GO:0005871	Cellular component	kinesin complex
Pg_S1029.36	PgGF14-7	GO:0009965	Biological process	leaf morphogenesis
Pg_S1029.36	PgGF14-7	GO:0042470	Cellular component	melanosome
Pg_S1029.36	PgGF14-7	GO:0005739	Cellular component	mitochondrion
Pg_S1029.36	PgGF14-7	GO:0004497	Molecular function	monooxygenase activity
Pg_S1029.36	PgGF14-7	GO:0035308	Biological process	negative regulation of protein dephosphorylation
Pg_S1029.36	PgGF14-7	GO:0001764	Biological process	neuron migration
Pg_S1029.36	PgGF14-7	GO:0048011	Biological process	neurotrophin TRK receptor signaling pathway
Pg_S1029.36	PgGF14-7	GO:0005635	Cellular component	nuclear envelope
Pg_S1029.36	PgGF14-7	GO:0055114	Biological process	oxidation-reduction process
Pg_S1029.36	PgGF14-7	GO:0009405	Biological process	pathogenesis
Pg_S1029.36	PgGF14-7	GO:0004623	Molecular function	phospholipase A2 activity
Pg_S1029.36	PgGF14-7	GO:0050815	Molecular function	phosphoserine binding
Pg_S1029.36	PgGF14-7	GO:0005886	Cellular component	plasma membrane
Pg_S1029.36	PgGF14-7	GO:0009506	Cellular component	plasmodesma
Pg_S1029.36	PgGF14-7	GO:1900445	Biological process	positive regulation of filamentous growth of a population of unicellular organisms in response to biotic stimulus
Pg_S1029.36	PgGF14-7	GO:1900442	Biological process	positive regulation of filamentous growth of a population of unicellular organisms in response to neutral pH
Pg_S1029.36	PgGF14-7	GO:0032403	Molecular function	protein complex binding
Pg_S1029.36	PgGF14-7	GO:0019904	Molecular function	protein domain specific binding
Pg_S1029.36	PgGF14-7	GO:0006486	Biological process	protein glycosylation
Pg_S1029.36	PgGF14-7	GO:0008426	Molecular function	protein kinase C inhibitor activity
Pg_S1029.36	PgGF14-7	GO:0006605	Biological process	protein targeting
Pg_S1029.36	PgGF14-7	GO:0006109	Biological process	regulation of carbohydrate metabolic process
Pg_S1029.36	PgGF14-7	GO:0009909	Biological process	regulation of flower development
Pg_S1029.36	PgGF14-7	GO:0061062	Biological process	regulation of nematode larval development
Pg_S1029.36	PgGF14-7	GO:0006355	Biological process	regulation of transcription, DNA-dependent
Pg_S1029.36	PgGF14-7	GO:0009737	Biological process	response to abscisic acid stimulus
Pg_S1029.36	PgGF14-7	GO:0046686	Biological process	response to cadmium ion
Pg_S1029.36	PgGF14-7	GO:0010218	Biological process	response to far red light
Pg_S1029.36	PgGF14-7	GO:0080167	Biological process	response to karrikin
Pg_S1029.36	PgGF14-7	GO:0009624	Biological process	response to nematode
Pg_S1029.36	PgGF14-7	GO:0010114	Biological process	response to red light
Pg_S1029.36	PgGF14-7	GO:0048364	Biological process	root development
Pg_S1029.36	PgGF14-7	GO:0010162	Biological process	seed dormancy process
Pg_S1029.36	PgGF14-7	GO:0009845	Biological process	seed germination
Pg_S1029.36	PgGF14-7	GO:0009407	Biological process	toxin catabolic process
Pg_S1029.36	PgGF14-7	GO:0005774	Cellular component	vacuolar membrane
Pg_S1029.36	PgGF14-7	GO:0019048	Biological process	virus-host interaction
Pg_S1029.36	PgGF14-7	GO:0030445	Cellular component	yeast-form cell wall
Pg_S1055.45	PgGF14-32	GO:0006915	Biological process	apoptotic process
Pg_S1055.45	PgGF14-32	GO:0030437	Biological process	ascospore formation
Pg_S1055.45	PgGF14-32	GO:0005524	Molecular function	ATP binding
Pg_S1055.45	PgGF14-32	GO:0007411	Biological process	axon guidance
Pg_S1055.45	PgGF14-32	GO:0033267	Cellular component	axon part
Pg_S1055.45	PgGF14-32	GO:0009742	Biological process	brassinosteroid mediated signaling pathway
Pg_S1055.45	PgGF14-32	GO:0005509	Molecular function	calcium ion binding
Pg_S1055.45	PgGF14-32	GO:0021987	Biological process	cerebral cortex development
Pg_S1055.45	PgGF14-32	GO:0009570	Cellular component	chloroplast stroma
Pg_S1055.45	PgGF14-32	GO:0005694	Cellular component	chromosome
Pg_S1055.45	PgGF14-32	GO:0019344	Biological process	cysteine biosynthetic process
Pg_S1055.45	PgGF14-32	GO:0005829	Cellular component	cytosol
Pg_S1055.45	PgGF14-32	GO:0008340	Biological process	determination of adult lifespan
Pg_S1055.45	PgGF14-32	GO:0006270	Biological process	DNA replication initiation
Pg_S1055.45	PgGF14-32	GO:0003688	Molecular function	DNA replication origin binding
Pg_S1055.45	PgGF14-32	GO:0034221	Biological process	fungal-type cell wall chitin biosynthetic process
Pg_S1055.45	PgGF14-32	GO:0000086	Biological process	G2/M transition of mitotic cell cycle
Pg_S1055.45	PgGF14-32	GO:0007294	Biological process	germarium-derived oocyte fate determination
Pg_S1055.45	PgGF14-32	GO:0045172	Cellular component	germline ring canal
Pg_S1055.45	PgGF14-32	GO:0006096	Biological process	glycolysis
Pg_S1055.45	PgGF14-32	GO:0007030	Biological process	Golgi organization
Pg_S1055.45	PgGF14-32	GO:0035329	Biological process	hippo signaling cascade
Pg_S1055.45	PgGF14-32	GO:0021766	Biological process	hippocampus development
Pg_S1055.45	PgGF14-32	GO:0042826	Molecular function	histone deacetylase binding
Pg_S1055.45	PgGF14-32	GO:0042744	Biological process	hydrogen peroxide catabolic process
Pg_S1055.45	PgGF14-32	GO:0016818	Molecular function	hydrolase activity, acting on acid anhydrides, in phosphorus-containing anhydrides
Pg_S1055.45	PgGF14-32	GO:0006972	Biological process	hyperosmotic response
Pg_S1055.45	PgGF14-32	GO:0019288	Biological process	isopentenyl diphosphate biosynthetic process, mevalonate-independent pathway
Pg_S1055.45	PgGF14-32	GO:0005871	Cellular component	kinesin complex
Pg_S1055.45	PgGF14-32	GO:0048366	Biological process	leaf development
Pg_S1055.45	PgGF14-32	GO:0042470	Cellular component	melanosome
Pg_S1055.45	PgGF14-32	GO:0005739	Cellular component	mitochondrion
Pg_S1055.45	PgGF14-32	GO:0007095	Biological process	mitotic G2 DNA damage checkpoint
Pg_S1055.45	PgGF14-32	GO:0004497	Molecular function	monooxygenase activity
Pg_S1055.45	PgGF14-32	GO:0035308	Biological process	negative regulation of protein dephosphorylation
Pg_S1055.45	PgGF14-32	GO:0051436	Biological process	negative regulation of ubiquitin-protein ligase activity involved in mitotic cell cycle
Pg_S1055.45	PgGF14-32	GO:0001764	Biological process	neuron migration
Pg_S1055.45	PgGF14-32	GO:0048011	Biological process	neurotrophin TRK receptor signaling pathway
Pg_S1055.45	PgGF14-32	GO:0046958	Biological process	nonassociative learning
Pg_S1055.45	PgGF14-32	GO:0005634	Cellular component	nucleus
Pg_S1055.45	PgGF14-32	GO:0008103	Biological process	oocyte microtubule cytoskeleton polarization
Pg_S1055.45	PgGF14-32	GO:0055114	Biological process	oxidation-reduction process
Pg_S1055.45	PgGF14-32	GO:0050815	Molecular function	phosphoserine binding
Pg_S1055.45	PgGF14-32	GO:0005886	Cellular component	plasma membrane
Pg_S1055.45	PgGF14-32	GO:0009506	Cellular component	plasmodesma
Pg_S1055.45	PgGF14-32	GO:0007280	Biological process	pole cell migration
Pg_S1055.45	PgGF14-32	GO:0045927	Biological process	positive regulation of growth
Pg_S1055.45	PgGF14-32	GO:0048528	Biological process	post-embryonic root development
Pg_S1055.45	PgGF14-32	GO:0006267	Biological process	pre-replicative complex assembly
Pg_S1055.45	PgGF14-32	GO:0032403	Molecular function	protein complex binding
Pg_S1055.45	PgGF14-32	GO:0019904	Molecular function	protein domain specific binding
Pg_S1055.45	PgGF14-32	GO:0046982	Molecular function	protein heterodimerization activity
Pg_S1055.45	PgGF14-32	GO:0008426	Molecular function	protein kinase C inhibitor activity
Pg_S1055.45	PgGF14-32	GO:0006605	Biological process	protein targeting
Pg_S1055.45	PgGF14-32	GO:0007124	Biological process	pseudohyphal growth
Pg_S1055.45	PgGF14-32	GO:0007265	Biological process	Ras protein signal transduction
Pg_S1055.45	PgGF14-32	GO:0007088	Biological process	regulation of mitosis
Pg_S1055.45	PgGF14-32	GO:0032880	Biological process	regulation of protein localization
Pg_S1055.45	PgGF14-32	GO:0006355	Biological process	regulation of transcription, DNA-dependent
Pg_S1055.45	PgGF14-32	GO:0009737	Biological process	response to abscisic acid stimulus
Pg_S1055.45	PgGF14-32	GO:0046686	Biological process	response to cadmium ion
Pg_S1055.45	PgGF14-32	GO:0009750	Biological process	response to fructose stimulus
Pg_S1055.45	PgGF14-32	GO:0009651	Biological process	response to salt stress
Pg_S1055.45	PgGF14-32	GO:0009266	Biological process	response to temperature stimulus
Pg_S1055.45	PgGF14-32	GO:0009411	Biological process	response to UV
Pg_S1055.45	PgGF14-32	GO:0001402	Biological process	signal transduction involved in filamentous growth
Pg_S1055.45	PgGF14-32	GO:0019048	Biological process	virus-host interaction
Pg_S1055.45	PgGF14-32	GO:0006833	Biological process	water transport
Pg_S1055.45	PgGF14-32	GO:0048190	Biological process	wing disc dorsal/ventral pattern formation
Pg_S1497.31	PgGF14-25	GO:0006588	Biological process	activation of tryptophan 5-monooxygenase activity
Pg_S1497.31	PgGF14-25	GO:0043090	Biological process	amino acid import
Pg_S1497.31	PgGF14-25	GO:0048046	Cellular component	apoplast
Pg_S1497.31	PgGF14-25	GO:0006915	Biological process	apoptotic process
Pg_S1497.31	PgGF14-25	GO:0005524	Molecular function	ATP binding
Pg_S1497.31	PgGF14-25	GO:0007411	Biological process	axon guidance
Pg_S1497.31	PgGF14-25	GO:0033267	Cellular component	axon part
Pg_S1497.31	PgGF14-25	GO:0009742	Biological process	brassinosteroid mediated signaling pathway
Pg_S1497.31	PgGF14-25	GO:0005618	Cellular component	cell wall
Pg_S1497.31	PgGF14-25	GO:0021987	Biological process	cerebral cortex development
Pg_S1497.31	PgGF14-25	GO:0009570	Cellular component	chloroplast stroma
Pg_S1497.31	PgGF14-25	GO:0005694	Cellular component	chromosome
Pg_S1497.31	PgGF14-25	GO:0005829	Cellular component	cytosol
Pg_S1497.31	PgGF14-25	GO:0008340	Biological process	determination of adult lifespan
Pg_S1497.31	PgGF14-25	GO:0009793	Biological process	embryo development ending in seed dormancy
Pg_S1497.31	PgGF14-25	GO:0006888	Biological process	ER to Golgi vesicle-mediated transport
Pg_S1497.31	PgGF14-25	GO:0048449	Biological process	floral organ formation
Pg_S1497.31	PgGF14-25	GO:0000086	Biological process	G2/M transition of mitotic cell cycle
Pg_S1497.31	PgGF14-25	GO:0007294	Biological process	germarium-derived oocyte fate determination
Pg_S1497.31	PgGF14-25	GO:0045172	Cellular component	germline ring canal
Pg_S1497.31	PgGF14-25	GO:0005794	Cellular component	Golgi apparatus
Pg_S1497.31	PgGF14-25	GO:0035329	Biological process	hippo signaling cascade
Pg_S1497.31	PgGF14-25	GO:0021766	Biological process	hippocampus development
Pg_S1497.31	PgGF14-25	GO:0042826	Molecular function	histone deacetylase binding
Pg_S1497.31	PgGF14-25	GO:0016570	Biological process	histone modification
Pg_S1497.31	PgGF14-25	GO:0016818	Molecular function	hydrolase activity, acting on acid anhydrides, in phosphorus-containing anhydrides
Pg_S1497.31	PgGF14-25	GO:0005871	Cellular component	kinesin complex
Pg_S1497.31	PgGF14-25	GO:0009965	Biological process	leaf morphogenesis
Pg_S1497.31	PgGF14-25	GO:0042470	Cellular component	melanosome
Pg_S1497.31	PgGF14-25	GO:0005739	Cellular component	mitochondrion
Pg_S1497.31	PgGF14-25	GO:0007095	Biological process	mitotic G2 DNA damage checkpoint
Pg_S1497.31	PgGF14-25	GO:0004497	Molecular function	monooxygenase activity
Pg_S1497.31	PgGF14-25	GO:0035308	Biological process	negative regulation of protein dephosphorylation
Pg_S1497.31	PgGF14-25	GO:0001764	Biological process	neuron migration
Pg_S1497.31	PgGF14-25	GO:0048011	Biological process	neurotrophin TRK receptor signaling pathway
Pg_S1497.31	PgGF14-25	GO:0046958	Biological process	nonassociative learning
Pg_S1497.31	PgGF14-25	GO:0005635	Cellular component	nuclear envelope
Pg_S1497.31	PgGF14-25	GO:0008103	Biological process	oocyte microtubule cytoskeleton polarization
Pg_S1497.31	PgGF14-25	GO:0055114	Biological process	oxidation-reduction process
Pg_S1497.31	PgGF14-25	GO:0004623	Molecular function	phospholipase A2 activity
Pg_S1497.31	PgGF14-25	GO:0050815	Molecular function	phosphoserine binding
Pg_S1497.31	PgGF14-25	GO:0005886	Cellular component	plasma membrane
Pg_S1497.31	PgGF14-25	GO:0009506	Cellular component	plasmodesma
Pg_S1497.31	PgGF14-25	GO:0007280	Biological process	pole cell migration
Pg_S1497.31	PgGF14-25	GO:0045927	Biological process	positive regulation of growth
Pg_S1497.31	PgGF14-25	GO:0032403	Molecular function	protein complex binding
Pg_S1497.31	PgGF14-25	GO:0019904	Molecular function	protein domain specific binding
Pg_S1497.31	PgGF14-25	GO:0006486	Biological process	protein glycosylation
Pg_S1497.31	PgGF14-25	GO:0046982	Molecular function	protein heterodimerization activity
Pg_S1497.31	PgGF14-25	GO:0008426	Molecular function	protein kinase C inhibitor activity
Pg_S1497.31	PgGF14-25	GO:0006605	Biological process	protein targeting
Pg_S1497.31	PgGF14-25	GO:0007265	Biological process	Ras protein signal transduction
Pg_S1497.31	PgGF14-25	GO:0009909	Biological process	regulation of flower development
Pg_S1497.31	PgGF14-25	GO:0007088	Biological process	regulation of mitosis
Pg_S1497.31	PgGF14-25	GO:0061062	Biological process	regulation of nematode larval development
Pg_S1497.31	PgGF14-25	GO:0006355	Biological process	regulation of transcription, DNA-dependent
Pg_S1497.31	PgGF14-25	GO:0009737	Biological process	response to abscisic acid stimulus
Pg_S1497.31	PgGF14-25	GO:0046686	Biological process	response to cadmium ion
Pg_S1497.31	PgGF14-25	GO:0010218	Biological process	response to far red light
Pg_S1497.31	PgGF14-25	GO:0080167	Biological process	response to karrikin
Pg_S1497.31	PgGF14-25	GO:0009624	Biological process	response to nematode
Pg_S1497.31	PgGF14-25	GO:0010114	Biological process	response to red light
Pg_S1497.31	PgGF14-25	GO:0009411	Biological process	response to UV
Pg_S1497.31	PgGF14-25	GO:0048364	Biological process	root development
Pg_S1497.31	PgGF14-25	GO:0010162	Biological process	seed dormancy process
Pg_S1497.31	PgGF14-25	GO:0009845	Biological process	seed germination
Pg_S1497.31	PgGF14-25	GO:0009407	Biological process	toxin catabolic process
Pg_S1497.31	PgGF14-25	GO:0005774	Cellular component	vacuolar membrane
Pg_S1497.31	PgGF14-25	GO:0019048	Biological process	virus-host interaction
Pg_S1497.31	PgGF14-25	GO:0048190	Biological process	wing disc dorsal/ventral pattern formation
Pg_S1590.20	PgGF14-41	GO:0006915	Biological process	apoptotic process
Pg_S1590.20	PgGF14-41	GO:0030437	Biological process	ascospore formation
Pg_S1590.20	PgGF14-41	GO:0005524	Molecular function	ATP binding
Pg_S1590.20	PgGF14-41	GO:0007411	Biological process	axon guidance
Pg_S1590.20	PgGF14-41	GO:0033267	Cellular component	axon part
Pg_S1590.20	PgGF14-41	GO:0009742	Biological process	brassinosteroid mediated signaling pathway
Pg_S1590.20	PgGF14-41	GO:0005509	Molecular function	calcium ion binding
Pg_S1590.20	PgGF14-41	GO:0005618	Cellular component	cell wall
Pg_S1590.20	PgGF14-41	GO:0021987	Biological process	cerebral cortex development
Pg_S1590.20	PgGF14-41	GO:0009570	Cellular component	chloroplast stroma
Pg_S1590.20	PgGF14-41	GO:0005694	Cellular component	chromosome
Pg_S1590.20	PgGF14-41	GO:0019344	Biological process	cysteine biosynthetic process
Pg_S1590.20	PgGF14-41	GO:0005829	Cellular component	cytosol
Pg_S1590.20	PgGF14-41	GO:0008340	Biological process	determination of adult lifespan
Pg_S1590.20	PgGF14-41	GO:0006270	Biological process	DNA replication initiation
Pg_S1590.20	PgGF14-41	GO:0003688	Molecular function	DNA replication origin binding
Pg_S1590.20	PgGF14-41	GO:0034221	Biological process	fungal-type cell wall chitin biosynthetic process
Pg_S1590.20	PgGF14-41	GO:0000086	Biological process	G2/M transition of mitotic cell cycle
Pg_S1590.20	PgGF14-41	GO:0007294	Biological process	germarium-derived oocyte fate determination
Pg_S1590.20	PgGF14-41	GO:0045172	Cellular component	germline ring canal
Pg_S1590.20	PgGF14-41	GO:0005977	Biological process	glycogen metabolic process
Pg_S1590.20	PgGF14-41	GO:0006096	Biological process	glycolysis
Pg_S1590.20	PgGF14-41	GO:0007030	Biological process	Golgi organization
Pg_S1590.20	PgGF14-41	GO:0035329	Biological process	hippo signaling cascade
Pg_S1590.20	PgGF14-41	GO:0021766	Biological process	hippocampus development
Pg_S1590.20	PgGF14-41	GO:0042826	Molecular function	histone deacetylase binding
Pg_S1590.20	PgGF14-41	GO:0042744	Biological process	hydrogen peroxide catabolic process
Pg_S1590.20	PgGF14-41	GO:0016818	Molecular function	hydrolase activity, acting on acid anhydrides, in phosphorus-containing anhydrides
Pg_S1590.20	PgGF14-41	GO:0006972	Biological process	hyperosmotic response
Pg_S1590.20	PgGF14-41	GO:0019288	Biological process	isopentenyl diphosphate biosynthetic process, mevalonate-independent pathway
Pg_S1590.20	PgGF14-41	GO:0005871	Cellular component	kinesin complex
Pg_S1590.20	PgGF14-41	GO:0048366	Biological process	leaf development
Pg_S1590.20	PgGF14-41	GO:0042470	Cellular component	melanosome
Pg_S1590.20	PgGF14-41	GO:0005739	Cellular component	mitochondrion
Pg_S1590.20	PgGF14-41	GO:0007095	Biological process	mitotic G2 DNA damage checkpoint
Pg_S1590.20	PgGF14-41	GO:0004497	Molecular function	monooxygenase activity
Pg_S1590.20	PgGF14-41	GO:0043581	Biological process	mycelium development
Pg_S1590.20	PgGF14-41	GO:0035308	Biological process	negative regulation of protein dephosphorylation
Pg_S1590.20	PgGF14-41	GO:0051436	Biological process	negative regulation of ubiquitin-protein ligase activity involved in mitotic cell cycle
Pg_S1590.20	PgGF14-41	GO:0001764	Biological process	neuron migration
Pg_S1590.20	PgGF14-41	GO:0048011	Biological process	neurotrophin TRK receptor signaling pathway
Pg_S1590.20	PgGF14-41	GO:0046958	Biological process	nonassociative learning
Pg_S1590.20	PgGF14-41	GO:0005635	Cellular component	nuclear envelope
Pg_S1590.20	PgGF14-41	GO:0008103	Biological process	oocyte microtubule cytoskeleton polarization
Pg_S1590.20	PgGF14-41	GO:0050815	Molecular function	phosphoserine binding
Pg_S1590.20	PgGF14-41	GO:0005886	Cellular component	plasma membrane
Pg_S1590.20	PgGF14-41	GO:0009506	Cellular component	plasmodesma
Pg_S1590.20	PgGF14-41	GO:0007280	Biological process	pole cell migration
Pg_S1590.20	PgGF14-41	GO:0045927	Biological process	positive regulation of growth
Pg_S1590.20	PgGF14-41	GO:0048528	Biological process	post-embryonic root development
Pg_S1590.20	PgGF14-41	GO:0006267	Biological process	pre-replicative complex assembly
Pg_S1590.20	PgGF14-41	GO:0032403	Molecular function	protein complex binding
Pg_S1590.20	PgGF14-41	GO:0019904	Molecular function	protein domain specific binding
Pg_S1590.20	PgGF14-41	GO:0046982	Molecular function	protein heterodimerization activity
Pg_S1590.20	PgGF14-41	GO:0008426	Molecular function	protein kinase C inhibitor activity
Pg_S1590.20	PgGF14-41	GO:0006605	Biological process	protein targeting
Pg_S1590.20	PgGF14-41	GO:0007124	Biological process	pseudohyphal growth
Pg_S1590.20	PgGF14-41	GO:0007265	Biological process	Ras protein signal transduction
Pg_S1590.20	PgGF14-41	GO:0007088	Biological process	regulation of mitosis
Pg_S1590.20	PgGF14-41	GO:0032880	Biological process	regulation of protein localization
Pg_S1590.20	PgGF14-41	GO:0006355	Biological process	regulation of transcription, DNA-dependent
Pg_S1590.20	PgGF14-41	GO:0009737	Biological process	response to abscisic acid stimulus
Pg_S1590.20	PgGF14-41	GO:0046686	Biological process	response to cadmium ion
Pg_S1590.20	PgGF14-41	GO:0009750	Biological process	response to fructose stimulus
Pg_S1590.20	PgGF14-41	GO:0009651	Biological process	response to salt stress
Pg_S1590.20	PgGF14-41	GO:0009266	Biological process	response to temperature stimulus
Pg_S1590.20	PgGF14-41	GO:0009411	Biological process	response to UV
Pg_S1590.20	PgGF14-41	GO:0001402	Biological process	signal transduction involved in filamentous growth
Pg_S1590.20	PgGF14-41	GO:0019048	Biological process	virus-host interaction
Pg_S1590.20	PgGF14-41	GO:0006833	Biological process	water transport
Pg_S1590.20	PgGF14-41	GO:0048190	Biological process	wing disc dorsal/ventral pattern formation
Pg_S1693.13	PgGF14-24	GO:0006915	Biological process	apoptotic process
Pg_S1750.41	PgGF14-19	GO:0006588	Biological process	activation of tryptophan 5-monooxygenase activity
Pg_S1750.41	PgGF14-19	GO:0043090	Biological process	amino acid import
Pg_S1750.41	PgGF14-19	GO:0048046	Cellular component	apoplast
Pg_S1750.41	PgGF14-19	GO:0006915	Biological process	apoptotic process
Pg_S1750.41	PgGF14-19	GO:0005524	Molecular function	ATP binding
Pg_S1750.41	PgGF14-19	GO:0007411	Biological process	axon guidance
Pg_S1750.41	PgGF14-19	GO:0033267	Cellular component	axon part
Pg_S1750.41	PgGF14-19	GO:0009742	Biological process	brassinosteroid mediated signaling pathway
Pg_S1750.41	PgGF14-19	GO:0009986	Cellular component	cell surface
Pg_S1750.41	PgGF14-19	GO:0071216	Biological process	cellular response to biotic stimulus
Pg_S1750.41	PgGF14-19	GO:0034605	Biological process	cellular response to heat
Pg_S1750.41	PgGF14-19	GO:0036244	Biological process	cellular response to neutral pH
Pg_S1750.41	PgGF14-19	GO:0021987	Biological process	cerebral cortex development
Pg_S1750.41	PgGF14-19	GO:0001410	Biological process	chlamydospore formation
Pg_S1750.41	PgGF14-19	GO:0009570	Cellular component	chloroplast stroma
Pg_S1750.41	PgGF14-19	GO:0005694	Cellular component	chromosome
Pg_S1750.41	PgGF14-19	GO:0005829	Cellular component	cytosol
Pg_S1750.41	PgGF14-19	GO:0008340	Biological process	determination of adult lifespan
Pg_S1750.41	PgGF14-19	GO:0009793	Biological process	embryo development ending in seed dormancy
Pg_S1750.41	PgGF14-19	GO:0006888	Biological process	ER to Golgi vesicle-mediated transport
Pg_S1750.41	PgGF14-19	GO:0036180	Biological process	filamentous growth of a population of unicellular organisms in response to biotic stimulus
Pg_S1750.41	PgGF14-19	GO:0036168	Biological process	filamentous growth of a population of unicellular organisms in response to heat
Pg_S1750.41	PgGF14-19	GO:0036178	Biological process	filamentous growth of a population of unicellular organisms in response to neutral pH
Pg_S1750.41	PgGF14-19	GO:0048449	Biological process	floral organ formation
Pg_S1750.41	PgGF14-19	GO:0000086	Biological process	G2/M transition of mitotic cell cycle
Pg_S1750.41	PgGF14-19	GO:0007294	Biological process	germarium-derived oocyte fate determination
Pg_S1750.41	PgGF14-19	GO:0045172	Cellular component	germline ring canal
Pg_S1750.41	PgGF14-19	GO:0005794	Cellular component	Golgi apparatus
Pg_S1750.41	PgGF14-19	GO:0035329	Biological process	hippo signaling cascade
Pg_S1750.41	PgGF14-19	GO:0021766	Biological process	hippocampus development
Pg_S1750.41	PgGF14-19	GO:0042826	Molecular function	histone deacetylase binding
Pg_S1750.41	PgGF14-19	GO:0016570	Biological process	histone modification
Pg_S1750.41	PgGF14-19	GO:0016818	Molecular function	hydrolase activity, acting on acid anhydrides, in phosphorus-containing anhydrides
Pg_S1750.41	PgGF14-19	GO:0005871	Cellular component	kinesin complex
Pg_S1750.41	PgGF14-19	GO:0009965	Biological process	leaf morphogenesis
Pg_S1750.41	PgGF14-19	GO:0005739	Cellular component	mitochondrion
Pg_S1750.41	PgGF14-19	GO:0007095	Biological process	mitotic G2 DNA damage checkpoint
Pg_S1750.41	PgGF14-19	GO:0004497	Molecular function	monooxygenase activity
Pg_S1750.41	PgGF14-19	GO:0035308	Biological process	negative regulation of protein dephosphorylation
Pg_S1750.41	PgGF14-19	GO:0001764	Biological process	neuron migration
Pg_S1750.41	PgGF14-19	GO:0048011	Biological process	neurotrophin TRK receptor signaling pathway
Pg_S1750.41	PgGF14-19	GO:0046958	Biological process	nonassociative learning
Pg_S1750.41	PgGF14-19	GO:0005635	Cellular component	nuclear envelope
Pg_S1750.41	PgGF14-19	GO:0008103	Biological process	oocyte microtubule cytoskeleton polarization
Pg_S1750.41	PgGF14-19	GO:0009405	Biological process	pathogenesis
Pg_S1750.41	PgGF14-19	GO:0004623	Molecular function	phospholipase A2 activity
Pg_S1750.41	PgGF14-19	GO:0050815	Molecular function	phosphoserine binding
Pg_S1750.41	PgGF14-19	GO:0005886	Cellular component	plasma membrane
Pg_S1750.41	PgGF14-19	GO:0009506	Cellular component	plasmodesma
Pg_S1750.41	PgGF14-19	GO:0007280	Biological process	pole cell migration
Pg_S1750.41	PgGF14-19	GO:1900445	Biological process	positive regulation of filamentous growth of a population of unicellular organisms in response to biotic stimulus
Pg_S1750.41	PgGF14-19	GO:1900442	Biological process	positive regulation of filamentous growth of a population of unicellular organisms in response to neutral pH
Pg_S1750.41	PgGF14-19	GO:0032403	Molecular function	protein complex binding
Pg_S1750.41	PgGF14-19	GO:0019904	Molecular function	protein domain specific binding
Pg_S1750.41	PgGF14-19	GO:0006486	Biological process	protein glycosylation
Pg_S1750.41	PgGF14-19	GO:0046982	Molecular function	protein heterodimerization activity
Pg_S1750.41	PgGF14-19	GO:0008426	Molecular function	protein kinase C inhibitor activity
Pg_S1750.41	PgGF14-19	GO:0006605	Biological process	protein targeting
Pg_S1750.41	PgGF14-19	GO:0007265	Biological process	Ras protein signal transduction
Pg_S1750.41	PgGF14-19	GO:0006109	Biological process	regulation of carbohydrate metabolic process
Pg_S1750.41	PgGF14-19	GO:0009909	Biological process	regulation of flower development
Pg_S1750.41	PgGF14-19	GO:0007088	Biological process	regulation of mitosis
Pg_S1750.41	PgGF14-19	GO:0061062	Biological process	regulation of nematode larval development
Pg_S1750.41	PgGF14-19	GO:0006355	Biological process	regulation of transcription, DNA-dependent
Pg_S1750.41	PgGF14-19	GO:0009737	Biological process	response to abscisic acid stimulus
Pg_S1750.41	PgGF14-19	GO:0046686	Biological process	response to cadmium ion
Pg_S1750.41	PgGF14-19	GO:0010218	Biological process	response to far red light
Pg_S1750.41	PgGF14-19	GO:0080167	Biological process	response to karrikin
Pg_S1750.41	PgGF14-19	GO:0009624	Biological process	response to nematode
Pg_S1750.41	PgGF14-19	GO:0010114	Biological process	response to red light
Pg_S1750.41	PgGF14-19	GO:0009411	Biological process	response to UV
Pg_S1750.41	PgGF14-19	GO:0048364	Biological process	root development
Pg_S1750.41	PgGF14-19	GO:0010162	Biological process	seed dormancy process
Pg_S1750.41	PgGF14-19	GO:0009845	Biological process	seed germination
Pg_S1750.41	PgGF14-19	GO:0009407	Biological process	toxin catabolic process
Pg_S1750.41	PgGF14-19	GO:0005774	Cellular component	vacuolar membrane
Pg_S1750.41	PgGF14-19	GO:0048190	Biological process	wing disc dorsal/ventral pattern formation
Pg_S1750.41	PgGF14-19	GO:0030445	Cellular component	yeast-form cell wall
Pg_S1794.8	PgGF14-28	GO:0006588	Biological process	activation of tryptophan 5-monooxygenase activity
Pg_S1794.8	PgGF14-28	GO:0043090	Biological process	amino acid import
Pg_S1794.8	PgGF14-28	GO:0048046	Cellular component	apoplast
Pg_S1794.8	PgGF14-28	GO:0006915	Biological process	apoptotic process
Pg_S1794.8	PgGF14-28	GO:0030437	Biological process	ascospore formation
Pg_S1794.8	PgGF14-28	GO:0005524	Molecular function	ATP binding
Pg_S1794.8	PgGF14-28	GO:0033267	Cellular component	axon part
Pg_S1794.8	PgGF14-28	GO:0009742	Biological process	brassinosteroid mediated signaling pathway
Pg_S1794.8	PgGF14-28	GO:0005618	Cellular component	cell wall
Pg_S1794.8	PgGF14-28	GO:0021987	Biological process	cerebral cortex development
Pg_S1794.8	PgGF14-28	GO:0009570	Cellular component	chloroplast stroma
Pg_S1794.8	PgGF14-28	GO:0005829	Cellular component	cytosol
Pg_S1794.8	PgGF14-28	GO:0000077	Biological process	DNA damage checkpoint
Pg_S1794.8	PgGF14-28	GO:0006270	Biological process	DNA replication initiation
Pg_S1794.8	PgGF14-28	GO:0003688	Molecular function	DNA replication origin binding
Pg_S1794.8	PgGF14-28	GO:0009793	Biological process	embryo development ending in seed dormancy
Pg_S1794.8	PgGF14-28	GO:0006888	Biological process	ER to Golgi vesicle-mediated transport
Pg_S1794.8	PgGF14-28	GO:0048449	Biological process	floral organ formation
Pg_S1794.8	PgGF14-28	GO:0034221	Biological process	fungal-type cell wall chitin biosynthetic process
Pg_S1794.8	PgGF14-28	GO:0000086	Biological process	G2/M transition of mitotic cell cycle
Pg_S1794.8	PgGF14-28	GO:0005794	Cellular component	Golgi apparatus
Pg_S1794.8	PgGF14-28	GO:0035329	Biological process	hippo signaling cascade
Pg_S1794.8	PgGF14-28	GO:0021766	Biological process	hippocampus development
Pg_S1794.8	PgGF14-28	GO:0042826	Molecular function	histone deacetylase binding
Pg_S1794.8	PgGF14-28	GO:0016570	Biological process	histone modification
Pg_S1794.8	PgGF14-28	GO:0016818	Molecular function	hydrolase activity, acting on acid anhydrides, in phosphorus-containing anhydrides
Pg_S1794.8	PgGF14-28	GO:0005871	Cellular component	kinesin complex
Pg_S1794.8	PgGF14-28	GO:0009965	Biological process	leaf morphogenesis
Pg_S1794.8	PgGF14-28	GO:0042470	Cellular component	melanosome
Pg_S1794.8	PgGF14-28	GO:0005739	Cellular component	mitochondrion
Pg_S1794.8	PgGF14-28	GO:0004497	Molecular function	monooxygenase activity
Pg_S1794.8	PgGF14-28	GO:0035308	Biological process	negative regulation of protein dephosphorylation
Pg_S1794.8	PgGF14-28	GO:0051436	Biological process	negative regulation of ubiquitin-protein ligase activity involved in mitotic cell cycle
Pg_S1794.8	PgGF14-28	GO:0001764	Biological process	neuron migration
Pg_S1794.8	PgGF14-28	GO:0048011	Biological process	neurotrophin TRK receptor signaling pathway
Pg_S1794.8	PgGF14-28	GO:0005635	Cellular component	nuclear envelope
Pg_S1794.8	PgGF14-28	GO:0055114	Biological process	oxidation-reduction process
Pg_S1794.8	PgGF14-28	GO:0004623	Molecular function	phospholipase A2 activity
Pg_S1794.8	PgGF14-28	GO:0050815	Molecular function	phosphoserine binding
Pg_S1794.8	PgGF14-28	GO:0005886	Cellular component	plasma membrane
Pg_S1794.8	PgGF14-28	GO:0009506	Cellular component	plasmodesma
Pg_S1794.8	PgGF14-28	GO:0006267	Biological process	pre-replicative complex assembly
Pg_S1794.8	PgGF14-28	GO:0032403	Molecular function	protein complex binding
Pg_S1794.8	PgGF14-28	GO:0019904	Molecular function	protein domain specific binding
Pg_S1794.8	PgGF14-28	GO:0006486	Biological process	protein glycosylation
Pg_S1794.8	PgGF14-28	GO:0008426	Molecular function	protein kinase C inhibitor activity
Pg_S1794.8	PgGF14-28	GO:0006605	Biological process	protein targeting
Pg_S1794.8	PgGF14-28	GO:0007124	Biological process	pseudohyphal growth
Pg_S1794.8	PgGF14-28	GO:0009909	Biological process	regulation of flower development
Pg_S1794.8	PgGF14-28	GO:0061062	Biological process	regulation of nematode larval development
Pg_S1794.8	PgGF14-28	GO:0006355	Biological process	regulation of transcription, DNA-dependent
Pg_S1794.8	PgGF14-28	GO:0009737	Biological process	response to abscisic acid stimulus
Pg_S1794.8	PgGF14-28	GO:0046686	Biological process	response to cadmium ion
Pg_S1794.8	PgGF14-28	GO:0010218	Biological process	response to far red light
Pg_S1794.8	PgGF14-28	GO:0080167	Biological process	response to karrikin
Pg_S1794.8	PgGF14-28	GO:0009624	Biological process	response to nematode
Pg_S1794.8	PgGF14-28	GO:0010114	Biological process	response to red light
Pg_S1794.8	PgGF14-28	GO:0048364	Biological process	root development
Pg_S1794.8	PgGF14-28	GO:0010162	Biological process	seed dormancy process
Pg_S1794.8	PgGF14-28	GO:0009845	Biological process	seed germination
Pg_S1794.8	PgGF14-28	GO:0001402	Biological process	signal transduction involved in filamentous growth
Pg_S1794.8	PgGF14-28	GO:0009407	Biological process	toxin catabolic process
Pg_S1794.8	PgGF14-28	GO:0005774	Cellular component	vacuolar membrane
Pg_S1794.8	PgGF14-28	GO:0019048	Biological process	virus-host interaction
Pg_S2001.1	PgGF14-16	GO:0006588	Biological process	activation of tryptophan 5-monooxygenase activity
Pg_S2001.1	PgGF14-16	GO:0043090	Biological process	amino acid import
Pg_S2001.1	PgGF14-16	GO:0048046	Cellular component	apoplast
Pg_S2001.1	PgGF14-16	GO:0006915	Biological process	apoptotic process
Pg_S2001.1	PgGF14-16	GO:0030437	Biological process	ascospore formation
Pg_S2001.1	PgGF14-16	GO:0005524	Molecular function	ATP binding
Pg_S2001.1	PgGF14-16	GO:0033267	Cellular component	axon part
Pg_S2001.1	PgGF14-16	GO:0009742	Biological process	brassinosteroid mediated signaling pathway
Pg_S2001.1	PgGF14-16	GO:0005618	Cellular component	cell wall
Pg_S2001.1	PgGF14-16	GO:0021987	Biological process	cerebral cortex development
Pg_S2001.1	PgGF14-16	GO:0009570	Cellular component	chloroplast stroma
Pg_S2001.1	PgGF14-16	GO:0005829	Cellular component	cytosol
Pg_S2001.1	PgGF14-16	GO:0000077	Biological process	DNA damage checkpoint
Pg_S2001.1	PgGF14-16	GO:0006270	Biological process	DNA replication initiation
Pg_S2001.1	PgGF14-16	GO:0003688	Molecular function	DNA replication origin binding
Pg_S2001.1	PgGF14-16	GO:0009793	Biological process	embryo development ending in seed dormancy
Pg_S2001.1	PgGF14-16	GO:0006888	Biological process	ER to Golgi vesicle-mediated transport
Pg_S2001.1	PgGF14-16	GO:0048449	Biological process	floral organ formation
Pg_S2001.1	PgGF14-16	GO:0034221	Biological process	fungal-type cell wall chitin biosynthetic process
Pg_S2001.1	PgGF14-16	GO:0000086	Biological process	G2/M transition of mitotic cell cycle
Pg_S2001.1	PgGF14-16	GO:0005977	Biological process	glycogen metabolic process
Pg_S2001.1	PgGF14-16	GO:0005794	Cellular component	Golgi apparatus
Pg_S2001.1	PgGF14-16	GO:0035329	Biological process	hippo signaling cascade
Pg_S2001.1	PgGF14-16	GO:0021766	Biological process	hippocampus development
Pg_S2001.1	PgGF14-16	GO:0042826	Molecular function	histone deacetylase binding
Pg_S2001.1	PgGF14-16	GO:0016570	Biological process	histone modification
Pg_S2001.1	PgGF14-16	GO:0016818	Molecular function	hydrolase activity, acting on acid anhydrides, in phosphorus-containing anhydrides
Pg_S2001.1	PgGF14-16	GO:0005871	Cellular component	kinesin complex
Pg_S2001.1	PgGF14-16	GO:0009965	Biological process	leaf morphogenesis
Pg_S2001.1	PgGF14-16	GO:0042470	Cellular component	melanosome
Pg_S2001.1	PgGF14-16	GO:0005739	Cellular component	mitochondrion
Pg_S2001.1	PgGF14-16	GO:0004497	Molecular function	monooxygenase activity
Pg_S2001.1	PgGF14-16	GO:0043581	Biological process	mycelium development
Pg_S2001.1	PgGF14-16	GO:0035308	Biological process	negative regulation of protein dephosphorylation
Pg_S2001.1	PgGF14-16	GO:0051436	Biological process	negative regulation of ubiquitin-protein ligase activity involved in mitotic cell cycle
Pg_S2001.1	PgGF14-16	GO:0001764	Biological process	neuron migration
Pg_S2001.1	PgGF14-16	GO:0048011	Biological process	neurotrophin TRK receptor signaling pathway
Pg_S2001.1	PgGF14-16	GO:0005635	Cellular component	nuclear envelope
Pg_S2001.1	PgGF14-16	GO:0004623	Molecular function	phospholipase A2 activity
Pg_S2001.1	PgGF14-16	GO:0050815	Molecular function	phosphoserine binding
Pg_S2001.1	PgGF14-16	GO:0005886	Cellular component	plasma membrane
Pg_S2001.1	PgGF14-16	GO:0009506	Cellular component	plasmodesma
Pg_S2001.1	PgGF14-16	GO:0006267	Biological process	pre-replicative complex assembly
Pg_S2001.1	PgGF14-16	GO:0032403	Molecular function	protein complex binding
Pg_S2001.1	PgGF14-16	GO:0019904	Molecular function	protein domain specific binding
Pg_S2001.1	PgGF14-16	GO:0006486	Biological process	protein glycosylation
Pg_S2001.1	PgGF14-16	GO:0008426	Molecular function	protein kinase C inhibitor activity
Pg_S2001.1	PgGF14-16	GO:0006605	Biological process	protein targeting
Pg_S2001.1	PgGF14-16	GO:0007124	Biological process	pseudohyphal growth
Pg_S2001.1	PgGF14-16	GO:0007265	Biological process	Ras protein signal transduction
Pg_S2001.1	PgGF14-16	GO:0009909	Biological process	regulation of flower development
Pg_S2001.1	PgGF14-16	GO:0061062	Biological process	regulation of nematode larval development
Pg_S2001.1	PgGF14-16	GO:0006355	Biological process	regulation of transcription, DNA-dependent
Pg_S2001.1	PgGF14-16	GO:0009737	Biological process	response to abscisic acid stimulus
Pg_S2001.1	PgGF14-16	GO:0046686	Biological process	response to cadmium ion
Pg_S2001.1	PgGF14-16	GO:0010218	Biological process	response to far red light
Pg_S2001.1	PgGF14-16	GO:0080167	Biological process	response to karrikin
Pg_S2001.1	PgGF14-16	GO:0009624	Biological process	response to nematode
Pg_S2001.1	PgGF14-16	GO:0010114	Biological process	response to red light
Pg_S2001.1	PgGF14-16	GO:0048364	Biological process	root development
Pg_S2001.1	PgGF14-16	GO:0010162	Biological process	seed dormancy process
Pg_S2001.1	PgGF14-16	GO:0009845	Biological process	seed germination
Pg_S2001.1	PgGF14-16	GO:0001402	Biological process	signal transduction involved in filamentous growth
Pg_S2001.1	PgGF14-16	GO:0009407	Biological process	toxin catabolic process
Pg_S2001.1	PgGF14-16	GO:0005774	Cellular component	vacuolar membrane
Pg_S2001.1	PgGF14-16	GO:0019048	Biological process	virus-host interaction
Pg_S2020.18	PgGF14-18	GO:0006588	Biological process	activation of tryptophan 5-monooxygenase activity
Pg_S2020.18	PgGF14-18	GO:0006915	Biological process	apoptotic process
Pg_S2148.5	PgGF14-42	GO:0006915	Biological process	apoptotic process
Pg_S2148.5	PgGF14-42	GO:0030437	Biological process	ascospore formation
Pg_S2148.5	PgGF14-42	GO:0005524	Molecular function	ATP binding
Pg_S2148.5	PgGF14-42	GO:0007411	Biological process	axon guidance
Pg_S2148.5	PgGF14-42	GO:0033267	Cellular component	axon part
Pg_S2148.5	PgGF14-42	GO:0009742	Biological process	brassinosteroid mediated signaling pathway
Pg_S2148.5	PgGF14-42	GO:0005509	Molecular function	calcium ion binding
Pg_S2148.5	PgGF14-42	GO:0005618	Cellular component	cell wall
Pg_S2148.5	PgGF14-42	GO:0021987	Biological process	cerebral cortex development
Pg_S2148.5	PgGF14-42	GO:0009570	Cellular component	chloroplast stroma
Pg_S2148.5	PgGF14-42	GO:0005694	Cellular component	chromosome
Pg_S2148.5	PgGF14-42	GO:0019344	Biological process	cysteine biosynthetic process
Pg_S2148.5	PgGF14-42	GO:0005829	Cellular component	cytosol
Pg_S2148.5	PgGF14-42	GO:0008340	Biological process	determination of adult lifespan
Pg_S2148.5	PgGF14-42	GO:0006270	Biological process	DNA replication initiation
Pg_S2148.5	PgGF14-42	GO:0003688	Molecular function	DNA replication origin binding
Pg_S2148.5	PgGF14-42	GO:0034221	Biological process	fungal-type cell wall chitin biosynthetic process
Pg_S2148.5	PgGF14-42	GO:0000086	Biological process	G2/M transition of mitotic cell cycle
Pg_S2148.5	PgGF14-42	GO:0007294	Biological process	germarium-derived oocyte fate determination
Pg_S2148.5	PgGF14-42	GO:0045172	Cellular component	germline ring canal
Pg_S2148.5	PgGF14-42	GO:0005977	Biological process	glycogen metabolic process
Pg_S2148.5	PgGF14-42	GO:0006096	Biological process	glycolysis
Pg_S2148.5	PgGF14-42	GO:0007030	Biological process	Golgi organization
Pg_S2148.5	PgGF14-42	GO:0035329	Biological process	hippo signaling cascade
Pg_S2148.5	PgGF14-42	GO:0021766	Biological process	hippocampus development
Pg_S2148.5	PgGF14-42	GO:0042826	Molecular function	histone deacetylase binding
Pg_S2148.5	PgGF14-42	GO:0042744	Biological process	hydrogen peroxide catabolic process
Pg_S2148.5	PgGF14-42	GO:0016818	Molecular function	hydrolase activity, acting on acid anhydrides, in phosphorus-containing anhydrides
Pg_S2148.5	PgGF14-42	GO:0006972	Biological process	hyperosmotic response
Pg_S2148.5	PgGF14-42	GO:0019288	Biological process	isopentenyl diphosphate biosynthetic process, mevalonate-independent pathway
Pg_S2148.5	PgGF14-42	GO:0005871	Cellular component	kinesin complex
Pg_S2148.5	PgGF14-42	GO:0048366	Biological process	leaf development
Pg_S2148.5	PgGF14-42	GO:0042470	Cellular component	melanosome
Pg_S2148.5	PgGF14-42	GO:0005739	Cellular component	mitochondrion
Pg_S2148.5	PgGF14-42	GO:0007095	Biological process	mitotic G2 DNA damage checkpoint
Pg_S2148.5	PgGF14-42	GO:0004497	Molecular function	monooxygenase activity
Pg_S2148.5	PgGF14-42	GO:0043581	Biological process	mycelium development
Pg_S2148.5	PgGF14-42	GO:0035308	Biological process	negative regulation of protein dephosphorylation
Pg_S2148.5	PgGF14-42	GO:0051436	Biological process	negative regulation of ubiquitin-protein ligase activity involved in mitotic cell cycle
Pg_S2148.5	PgGF14-42	GO:0001764	Biological process	neuron migration
Pg_S2148.5	PgGF14-42	GO:0048011	Biological process	neurotrophin TRK receptor signaling pathway
Pg_S2148.5	PgGF14-42	GO:0046958	Biological process	nonassociative learning
Pg_S2148.5	PgGF14-42	GO:0005635	Cellular component	nuclear envelope
Pg_S2148.5	PgGF14-42	GO:0008103	Biological process	oocyte microtubule cytoskeleton polarization
Pg_S2148.5	PgGF14-42	GO:0050815	Molecular function	phosphoserine binding
Pg_S2148.5	PgGF14-42	GO:0005886	Cellular component	plasma membrane
Pg_S2148.5	PgGF14-42	GO:0009506	Cellular component	plasmodesma
Pg_S2148.5	PgGF14-42	GO:0007280	Biological process	pole cell migration
Pg_S2148.5	PgGF14-42	GO:0045927	Biological process	positive regulation of growth
Pg_S2148.5	PgGF14-42	GO:0048528	Biological process	post-embryonic root development
Pg_S2148.5	PgGF14-42	GO:0006267	Biological process	pre-replicative complex assembly
Pg_S2148.5	PgGF14-42	GO:0032403	Molecular function	protein complex binding
Pg_S2148.5	PgGF14-42	GO:0019904	Molecular function	protein domain specific binding
Pg_S2148.5	PgGF14-42	GO:0046982	Molecular function	protein heterodimerization activity
Pg_S2148.5	PgGF14-42	GO:0008426	Molecular function	protein kinase C inhibitor activity
Pg_S2148.5	PgGF14-42	GO:0006605	Biological process	protein targeting
Pg_S2148.5	PgGF14-42	GO:0007124	Biological process	pseudohyphal growth
Pg_S2148.5	PgGF14-42	GO:0007265	Biological process	Ras protein signal transduction
Pg_S2148.5	PgGF14-42	GO:0007088	Biological process	regulation of mitosis
Pg_S2148.5	PgGF14-42	GO:0032880	Biological process	regulation of protein localization
Pg_S2148.5	PgGF14-42	GO:0006355	Biological process	regulation of transcription, DNA-dependent
Pg_S2148.5	PgGF14-42	GO:0009737	Biological process	response to abscisic acid stimulus
Pg_S2148.5	PgGF14-42	GO:0046686	Biological process	response to cadmium ion
Pg_S2148.5	PgGF14-42	GO:0009750	Biological process	response to fructose stimulus
Pg_S2148.5	PgGF14-42	GO:0009651	Biological process	response to salt stress
Pg_S2148.5	PgGF14-42	GO:0009266	Biological process	response to temperature stimulus
Pg_S2148.5	PgGF14-42	GO:0009411	Biological process	response to UV
Pg_S2148.5	PgGF14-42	GO:0001402	Biological process	signal transduction involved in filamentous growth
Pg_S2148.5	PgGF14-42	GO:0019048	Biological process	virus-host interaction
Pg_S2148.5	PgGF14-42	GO:0006833	Biological process	water transport
Pg_S2148.5	PgGF14-42	GO:0048190	Biological process	wing disc dorsal/ventral pattern formation
Pg_S2151.5	PgGF14-17	GO:0006588	Biological process	activation of tryptophan 5-monooxygenase activity
Pg_S2151.5	PgGF14-17	GO:0043090	Biological process	amino acid import
Pg_S2151.5	PgGF14-17	GO:0048046	Cellular component	apoplast
Pg_S2151.5	PgGF14-17	GO:0006915	Biological process	apoptotic process
Pg_S2151.5	PgGF14-17	GO:0005524	Molecular function	ATP binding
Pg_S2151.5	PgGF14-17	GO:0033267	Cellular component	axon part
Pg_S2151.5	PgGF14-17	GO:0009742	Biological process	brassinosteroid mediated signaling pathway
Pg_S2151.5	PgGF14-17	GO:0005618	Cellular component	cell wall
Pg_S2151.5	PgGF14-17	GO:0021987	Biological process	cerebral cortex development
Pg_S2151.5	PgGF14-17	GO:0009570	Cellular component	chloroplast stroma
Pg_S2151.5	PgGF14-17	GO:0005829	Cellular component	cytosol
Pg_S2151.5	PgGF14-17	GO:0000077	Biological process	DNA damage checkpoint
Pg_S2151.5	PgGF14-17	GO:0009793	Biological process	embryo development ending in seed dormancy
Pg_S2151.5	PgGF14-17	GO:0006888	Biological process	ER to Golgi vesicle-mediated transport
Pg_S2151.5	PgGF14-17	GO:0048449	Biological process	floral organ formation
Pg_S2151.5	PgGF14-17	GO:0000086	Biological process	G2/M transition of mitotic cell cycle
Pg_S2151.5	PgGF14-17	GO:0008378	Molecular function	galactosyltransferase activity
Pg_S2151.5	PgGF14-17	GO:0005794	Cellular component	Golgi apparatus
Pg_S2151.5	PgGF14-17	GO:0035329	Biological process	hippo signaling cascade
Pg_S2151.5	PgGF14-17	GO:0021766	Biological process	hippocampus development
Pg_S2151.5	PgGF14-17	GO:0042826	Molecular function	histone deacetylase binding
Pg_S2151.5	PgGF14-17	GO:0016570	Biological process	histone modification
Pg_S2151.5	PgGF14-17	GO:0016818	Molecular function	hydrolase activity, acting on acid anhydrides, in phosphorus-containing anhydrides
Pg_S2151.5	PgGF14-17	GO:0005871	Cellular component	kinesin complex
Pg_S2151.5	PgGF14-17	GO:0009965	Biological process	leaf morphogenesis
Pg_S2151.5	PgGF14-17	GO:0042470	Cellular component	melanosome
Pg_S2151.5	PgGF14-17	GO:0005739	Cellular component	mitochondrion
Pg_S2151.5	PgGF14-17	GO:0004497	Molecular function	monooxygenase activity
Pg_S2151.5	PgGF14-17	GO:0035308	Biological process	negative regulation of protein dephosphorylation
Pg_S2151.5	PgGF14-17	GO:0001764	Biological process	neuron migration
Pg_S2151.5	PgGF14-17	GO:0048011	Biological process	neurotrophin TRK receptor signaling pathway
Pg_S2151.5	PgGF14-17	GO:0005635	Cellular component	nuclear envelope
Pg_S2151.5	PgGF14-17	GO:0055114	Biological process	oxidation-reduction process
Pg_S2151.5	PgGF14-17	GO:0004623	Molecular function	phospholipase A2 activity
Pg_S2151.5	PgGF14-17	GO:0050815	Molecular function	phosphoserine binding
Pg_S2151.5	PgGF14-17	GO:0005886	Cellular component	plasma membrane
Pg_S2151.5	PgGF14-17	GO:0009506	Cellular component	plasmodesma
Pg_S2151.5	PgGF14-17	GO:0032403	Molecular function	protein complex binding
Pg_S2151.5	PgGF14-17	GO:0019904	Molecular function	protein domain specific binding
Pg_S2151.5	PgGF14-17	GO:0006486	Biological process	protein glycosylation
Pg_S2151.5	PgGF14-17	GO:0008426	Molecular function	protein kinase C inhibitor activity
Pg_S2151.5	PgGF14-17	GO:0006605	Biological process	protein targeting
Pg_S2151.5	PgGF14-17	GO:0009909	Biological process	regulation of flower development
Pg_S2151.5	PgGF14-17	GO:0061062	Biological process	regulation of nematode larval development
Pg_S2151.5	PgGF14-17	GO:0006355	Biological process	regulation of transcription, DNA-dependent
Pg_S2151.5	PgGF14-17	GO:0009737	Biological process	response to abscisic acid stimulus
Pg_S2151.5	PgGF14-17	GO:0046686	Biological process	response to cadmium ion
Pg_S2151.5	PgGF14-17	GO:0010218	Biological process	response to far red light
Pg_S2151.5	PgGF14-17	GO:0080167	Biological process	response to karrikin
Pg_S2151.5	PgGF14-17	GO:0009624	Biological process	response to nematode
Pg_S2151.5	PgGF14-17	GO:0010114	Biological process	response to red light
Pg_S2151.5	PgGF14-17	GO:0048364	Biological process	root development
Pg_S2151.5	PgGF14-17	GO:0010162	Biological process	seed dormancy process
Pg_S2151.5	PgGF14-17	GO:0009845	Biological process	seed germination
Pg_S2151.5	PgGF14-17	GO:0009407	Biological process	toxin catabolic process
Pg_S2151.5	PgGF14-17	GO:0005774	Cellular component	vacuolar membrane
Pg_S2151.5	PgGF14-17	GO:0019048	Biological process	virus-host interaction
Pg_S2162.22	PgGF14-22	GO:0006588	Biological process	activation of tryptophan 5-monooxygenase activity
Pg_S2162.22	PgGF14-22	GO:0006915	Biological process	apoptotic process
Pg_S2162.22	PgGF14-22	GO:0030437	Biological process	ascospore formation
Pg_S2162.22	PgGF14-22	GO:0005524	Molecular function	ATP binding
Pg_S2162.22	PgGF14-22	GO:0007411	Biological process	axon guidance
Pg_S2162.22	PgGF14-22	GO:0033267	Cellular component	axon part
Pg_S2162.22	PgGF14-22	GO:0009742	Biological process	brassinosteroid mediated signaling pathway
Pg_S2162.22	PgGF14-22	GO:0005509	Molecular function	calcium ion binding
Pg_S2162.22	PgGF14-22	GO:0005618	Cellular component	cell wall
Pg_S2162.22	PgGF14-22	GO:0021987	Biological process	cerebral cortex development
Pg_S2162.22	PgGF14-22	GO:0009570	Cellular component	chloroplast stroma
Pg_S2162.22	PgGF14-22	GO:0005694	Cellular component	chromosome
Pg_S2162.22	PgGF14-22	GO:0019344	Biological process	cysteine biosynthetic process
Pg_S2162.22	PgGF14-22	GO:0005829	Cellular component	cytosol
Pg_S2162.22	PgGF14-22	GO:0008340	Biological process	determination of adult lifespan
Pg_S2162.22	PgGF14-22	GO:0006270	Biological process	DNA replication initiation
Pg_S2162.22	PgGF14-22	GO:0003688	Molecular function	DNA replication origin binding
Pg_S2162.22	PgGF14-22	GO:0034221	Biological process	fungal-type cell wall chitin biosynthetic process
Pg_S2162.22	PgGF14-22	GO:0000086	Biological process	G2/M transition of mitotic cell cycle
Pg_S2162.22	PgGF14-22	GO:0007294	Biological process	germarium-derived oocyte fate determination
Pg_S2162.22	PgGF14-22	GO:0045172	Cellular component	germline ring canal
Pg_S2162.22	PgGF14-22	GO:0006096	Biological process	glycolysis
Pg_S2162.22	PgGF14-22	GO:0007030	Biological process	Golgi organization
Pg_S2162.22	PgGF14-22	GO:0035329	Biological process	hippo signaling cascade
Pg_S2162.22	PgGF14-22	GO:0021766	Biological process	hippocampus development
Pg_S2162.22	PgGF14-22	GO:0042826	Molecular function	histone deacetylase binding
Pg_S2162.22	PgGF14-22	GO:0042744	Biological process	hydrogen peroxide catabolic process
Pg_S2162.22	PgGF14-22	GO:0016818	Molecular function	hydrolase activity, acting on acid anhydrides, in phosphorus-containing anhydrides
Pg_S2162.22	PgGF14-22	GO:0006972	Biological process	hyperosmotic response
Pg_S2162.22	PgGF14-22	GO:0019288	Biological process	isopentenyl diphosphate biosynthetic process, mevalonate-independent pathway
Pg_S2162.22	PgGF14-22	GO:0005871	Cellular component	kinesin complex
Pg_S2162.22	PgGF14-22	GO:0048366	Biological process	leaf development
Pg_S2162.22	PgGF14-22	GO:0042470	Cellular component	melanosome
Pg_S2162.22	PgGF14-22	GO:0005739	Cellular component	mitochondrion
Pg_S2162.22	PgGF14-22	GO:0007095	Biological process	mitotic G2 DNA damage checkpoint
Pg_S2162.22	PgGF14-22	GO:0004497	Molecular function	monooxygenase activity
Pg_S2162.22	PgGF14-22	GO:0035308	Biological process	negative regulation of protein dephosphorylation
Pg_S2162.22	PgGF14-22	GO:0051436	Biological process	negative regulation of ubiquitin-protein ligase activity involved in mitotic cell cycle
Pg_S2162.22	PgGF14-22	GO:0001764	Biological process	neuron migration
Pg_S2162.22	PgGF14-22	GO:0048011	Biological process	neurotrophin TRK receptor signaling pathway
Pg_S2162.22	PgGF14-22	GO:0046958	Biological process	nonassociative learning
Pg_S2162.22	PgGF14-22	GO:0005635	Cellular component	nuclear envelope
Pg_S2162.22	PgGF14-22	GO:0008103	Biological process	oocyte microtubule cytoskeleton polarization
Pg_S2162.22	PgGF14-22	GO:0055114	Biological process	oxidation-reduction process
Pg_S2162.22	PgGF14-22	GO:0004623	Molecular function	phospholipase A2 activity
Pg_S2162.22	PgGF14-22	GO:0050815	Molecular function	phosphoserine binding
Pg_S2162.22	PgGF14-22	GO:0005886	Cellular component	plasma membrane
Pg_S2162.22	PgGF14-22	GO:0009506	Cellular component	plasmodesma
Pg_S2162.22	PgGF14-22	GO:0007280	Biological process	pole cell migration
Pg_S2162.22	PgGF14-22	GO:0045927	Biological process	positive regulation of growth
Pg_S2162.22	PgGF14-22	GO:0048528	Biological process	post-embryonic root development
Pg_S2162.22	PgGF14-22	GO:0006267	Biological process	pre-replicative complex assembly
Pg_S2162.22	PgGF14-22	GO:0032403	Molecular function	protein complex binding
Pg_S2162.22	PgGF14-22	GO:0019904	Molecular function	protein domain specific binding
Pg_S2162.22	PgGF14-22	GO:0046982	Molecular function	protein heterodimerization activity
Pg_S2162.22	PgGF14-22	GO:0008426	Molecular function	protein kinase C inhibitor activity
Pg_S2162.22	PgGF14-22	GO:0006605	Biological process	protein targeting
Pg_S2162.22	PgGF14-22	GO:0007124	Biological process	pseudohyphal growth
Pg_S2162.22	PgGF14-22	GO:0007265	Biological process	Ras protein signal transduction
Pg_S2162.22	PgGF14-22	GO:0007088	Biological process	regulation of mitosis
Pg_S2162.22	PgGF14-22	GO:0032880	Biological process	regulation of protein localization
Pg_S2162.22	PgGF14-22	GO:0006355	Biological process	regulation of transcription, DNA-dependent
Pg_S2162.22	PgGF14-22	GO:0009737	Biological process	response to abscisic acid stimulus
Pg_S2162.22	PgGF14-22	GO:0046686	Biological process	response to cadmium ion
Pg_S2162.22	PgGF14-22	GO:0009750	Biological process	response to fructose stimulus
Pg_S2162.22	PgGF14-22	GO:0009651	Biological process	response to salt stress
Pg_S2162.22	PgGF14-22	GO:0009266	Biological process	response to temperature stimulus
Pg_S2162.22	PgGF14-22	GO:0009411	Biological process	response to UV
Pg_S2162.22	PgGF14-22	GO:0001402	Biological process	signal transduction involved in filamentous growth
Pg_S2162.22	PgGF14-22	GO:0019048	Biological process	virus-host interaction
Pg_S2162.22	PgGF14-22	GO:0006833	Biological process	water transport
Pg_S2162.22	PgGF14-22	GO:0048190	Biological process	wing disc dorsal/ventral pattern formation
Pg_S2390.8	PgGF14-21	GO:0006588	Biological process	activation of tryptophan 5-monooxygenase activity
Pg_S2390.8	PgGF14-21	GO:0043090	Biological process	amino acid import
Pg_S2390.8	PgGF14-21	GO:0048046	Cellular component	apoplast
Pg_S2390.8	PgGF14-21	GO:0006915	Biological process	apoptotic process
Pg_S2390.8	PgGF14-21	GO:0005524	Molecular function	ATP binding
Pg_S2390.8	PgGF14-21	GO:0007411	Biological process	axon guidance
Pg_S2390.8	PgGF14-21	GO:0033267	Cellular component	axon part
Pg_S2390.8	PgGF14-21	GO:0009742	Biological process	brassinosteroid mediated signaling pathway
Pg_S2390.8	PgGF14-21	GO:0009986	Cellular component	cell surface
Pg_S2390.8	PgGF14-21	GO:0071216	Biological process	cellular response to biotic stimulus
Pg_S2390.8	PgGF14-21	GO:0034605	Biological process	cellular response to heat
Pg_S2390.8	PgGF14-21	GO:0036244	Biological process	cellular response to neutral pH
Pg_S2390.8	PgGF14-21	GO:0021987	Biological process	cerebral cortex development
Pg_S2390.8	PgGF14-21	GO:0001410	Biological process	chlamydospore formation
Pg_S2390.8	PgGF14-21	GO:0009570	Cellular component	chloroplast stroma
Pg_S2390.8	PgGF14-21	GO:0005694	Cellular component	chromosome
Pg_S2390.8	PgGF14-21	GO:0005829	Cellular component	cytosol
Pg_S2390.8	PgGF14-21	GO:0008340	Biological process	determination of adult lifespan
Pg_S2390.8	PgGF14-21	GO:0009793	Biological process	embryo development ending in seed dormancy
Pg_S2390.8	PgGF14-21	GO:0006888	Biological process	ER to Golgi vesicle-mediated transport
Pg_S2390.8	PgGF14-21	GO:0036180	Biological process	filamentous growth of a population of unicellular organisms in response to biotic stimulus
Pg_S2390.8	PgGF14-21	GO:0036168	Biological process	filamentous growth of a population of unicellular organisms in response to heat
Pg_S2390.8	PgGF14-21	GO:0036178	Biological process	filamentous growth of a population of unicellular organisms in response to neutral pH
Pg_S2390.8	PgGF14-21	GO:0048449	Biological process	floral organ formation
Pg_S2390.8	PgGF14-21	GO:0000086	Biological process	G2/M transition of mitotic cell cycle
Pg_S2390.8	PgGF14-21	GO:0007294	Biological process	germarium-derived oocyte fate determination
Pg_S2390.8	PgGF14-21	GO:0045172	Cellular component	germline ring canal
Pg_S2390.8	PgGF14-21	GO:0005794	Cellular component	Golgi apparatus
Pg_S2390.8	PgGF14-21	GO:0035329	Biological process	hippo signaling cascade
Pg_S2390.8	PgGF14-21	GO:0021766	Biological process	hippocampus development
Pg_S2390.8	PgGF14-21	GO:0042826	Molecular function	histone deacetylase binding
Pg_S2390.8	PgGF14-21	GO:0016570	Biological process	histone modification
Pg_S2390.8	PgGF14-21	GO:0016818	Molecular function	hydrolase activity, acting on acid anhydrides, in phosphorus-containing anhydrides
Pg_S2390.8	PgGF14-21	GO:0005871	Cellular component	kinesin complex
Pg_S2390.8	PgGF14-21	GO:0009965	Biological process	leaf morphogenesis
Pg_S2390.8	PgGF14-21	GO:0042470	Cellular component	melanosome
Pg_S2390.8	PgGF14-21	GO:0005739	Cellular component	mitochondrion
Pg_S2390.8	PgGF14-21	GO:0007095	Biological process	mitotic G2 DNA damage checkpoint
Pg_S2390.8	PgGF14-21	GO:0004497	Molecular function	monooxygenase activity
Pg_S2390.8	PgGF14-21	GO:0035308	Biological process	negative regulation of protein dephosphorylation
Pg_S2390.8	PgGF14-21	GO:0001764	Biological process	neuron migration
Pg_S2390.8	PgGF14-21	GO:0048011	Biological process	neurotrophin TRK receptor signaling pathway
Pg_S2390.8	PgGF14-21	GO:0046958	Biological process	nonassociative learning
Pg_S2390.8	PgGF14-21	GO:0005635	Cellular component	nuclear envelope
Pg_S2390.8	PgGF14-21	GO:0008103	Biological process	oocyte microtubule cytoskeleton polarization
Pg_S2390.8	PgGF14-21	GO:0055114	Biological process	oxidation-reduction process
Pg_S2390.8	PgGF14-21	GO:0009405	Biological process	pathogenesis
Pg_S2390.8	PgGF14-21	GO:0004623	Molecular function	phospholipase A2 activity
Pg_S2390.8	PgGF14-21	GO:0050815	Molecular function	phosphoserine binding
Pg_S2390.8	PgGF14-21	GO:0005886	Cellular component	plasma membrane
Pg_S2390.8	PgGF14-21	GO:0009506	Cellular component	plasmodesma
Pg_S2390.8	PgGF14-21	GO:0007280	Biological process	pole cell migration
Pg_S2390.8	PgGF14-21	GO:1900445	Biological process	positive regulation of filamentous growth of a population of unicellular organisms in response to biotic stimulus
Pg_S2390.8	PgGF14-21	GO:1900442	Biological process	positive regulation of filamentous growth of a population of unicellular organisms in response to neutral pH
Pg_S2390.8	PgGF14-21	GO:0032403	Molecular function	protein complex binding
Pg_S2390.8	PgGF14-21	GO:0019904	Molecular function	protein domain specific binding
Pg_S2390.8	PgGF14-21	GO:0006486	Biological process	protein glycosylation
Pg_S2390.8	PgGF14-21	GO:0046982	Molecular function	protein heterodimerization activity
Pg_S2390.8	PgGF14-21	GO:0008426	Molecular function	protein kinase C inhibitor activity
Pg_S2390.8	PgGF14-21	GO:0006605	Biological process	protein targeting
Pg_S2390.8	PgGF14-21	GO:0007265	Biological process	Ras protein signal transduction
Pg_S2390.8	PgGF14-21	GO:0006109	Biological process	regulation of carbohydrate metabolic process
Pg_S2390.8	PgGF14-21	GO:0009909	Biological process	regulation of flower development
Pg_S2390.8	PgGF14-21	GO:0007088	Biological process	regulation of mitosis
Pg_S2390.8	PgGF14-21	GO:0061062	Biological process	regulation of nematode larval development
Pg_S2390.8	PgGF14-21	GO:0006355	Biological process	regulation of transcription, DNA-dependent
Pg_S2390.8	PgGF14-21	GO:0009737	Biological process	response to abscisic acid stimulus
Pg_S2390.8	PgGF14-21	GO:0046686	Biological process	response to cadmium ion
Pg_S2390.8	PgGF14-21	GO:0010218	Biological process	response to far red light
Pg_S2390.8	PgGF14-21	GO:0080167	Biological process	response to karrikin
Pg_S2390.8	PgGF14-21	GO:0009624	Biological process	response to nematode
Pg_S2390.8	PgGF14-21	GO:0010114	Biological process	response to red light
Pg_S2390.8	PgGF14-21	GO:0009411	Biological process	response to UV
Pg_S2390.8	PgGF14-21	GO:0048364	Biological process	root development
Pg_S2390.8	PgGF14-21	GO:0010162	Biological process	seed dormancy process
Pg_S2390.8	PgGF14-21	GO:0009845	Biological process	seed germination
Pg_S2390.8	PgGF14-21	GO:0009407	Biological process	toxin catabolic process
Pg_S2390.8	PgGF14-21	GO:0005774	Cellular component	vacuolar membrane
Pg_S2390.8	PgGF14-21	GO:0019048	Biological process	virus-host interaction
Pg_S2390.8	PgGF14-21	GO:0048190	Biological process	wing disc dorsal/ventral pattern formation
Pg_S2390.8	PgGF14-21	GO:0030445	Cellular component	yeast-form cell wall
Pg_S2402.1	PgGF14-23	GO:0048046	Cellular component	apoplast
Pg_S2402.1	PgGF14-23	GO:0005524	Molecular function	ATP binding
Pg_S2402.1	PgGF14-23	GO:0009742	Biological process	brassinosteroid mediated signaling pathway
Pg_S2402.1	PgGF14-23	GO:0009986	Cellular component	cell surface
Pg_S2402.1	PgGF14-23	GO:0006725	Biological process	cellular aromatic compound metabolic process
Pg_S2402.1	PgGF14-23	GO:0071840	Biological process	cellular component organization or biogenesis
Pg_S2402.1	PgGF14-23	GO:0034645	Biological process	cellular macromolecule biosynthetic process
Pg_S2402.1	PgGF14-23	GO:0034641	Biological process	cellular nitrogen compound metabolic process
Pg_S2402.1	PgGF14-23	GO:0071216	Biological process	cellular response to biotic stimulus
Pg_S2402.1	PgGF14-23	GO:0034605	Biological process	cellular response to heat
Pg_S2402.1	PgGF14-23	GO:0036244	Biological process	cellular response to neutral pH
Pg_S2402.1	PgGF14-23	GO:0001410	Biological process	chlamydospore formation
Pg_S2402.1	PgGF14-23	GO:0009570	Cellular component	chloroplast stroma
Pg_S2402.1	PgGF14-23	GO:0005829	Cellular component	cytosol
Pg_S2402.1	PgGF14-23	GO:0036180	Biological process	filamentous growth of a population of unicellular organisms in response to biotic stimulus
Pg_S2402.1	PgGF14-23	GO:0036168	Biological process	filamentous growth of a population of unicellular organisms in response to heat
Pg_S2402.1	PgGF14-23	GO:0036178	Biological process	filamentous growth of a population of unicellular organisms in response to neutral pH
Pg_S2402.1	PgGF14-23	GO:0005794	Cellular component	Golgi apparatus
Pg_S2402.1	PgGF14-23	GO:0046483	Biological process	heterocycle metabolic process
Pg_S2402.1	PgGF14-23	GO:0048366	Biological process	leaf development
Pg_S2402.1	PgGF14-23	GO:0005739	Cellular component	mitochondrion
Pg_S2402.1	PgGF14-23	GO:0005635	Cellular component	nuclear envelope
Pg_S2402.1	PgGF14-23	GO:1901360	Biological process	organic cyclic compound metabolic process
Pg_S2402.1	PgGF14-23	GO:0009405	Biological process	pathogenesis
Pg_S2402.1	PgGF14-23	GO:0005886	Cellular component	plasma membrane
Pg_S2402.1	PgGF14-23	GO:0009506	Cellular component	plasmodesma
Pg_S2402.1	PgGF14-23	GO:1900445	Biological process	positive regulation of filamentous growth of a population of unicellular organisms in response to biotic stimulus
Pg_S2402.1	PgGF14-23	GO:1900442	Biological process	positive regulation of filamentous growth of a population of unicellular organisms in response to neutral pH
Pg_S2402.1	PgGF14-23	GO:0009791	Biological process	post-embryonic development
Pg_S2402.1	PgGF14-23	GO:0044238	Biological process	primary metabolic process
Pg_S2402.1	PgGF14-23	GO:0008426	Molecular function	protein kinase C inhibitor activity
Pg_S2402.1	PgGF14-23	GO:0045309	Molecular function	protein phosphorylated amino acid binding
Pg_S2402.1	PgGF14-23	GO:0006109	Biological process	regulation of carbohydrate metabolic process
Pg_S2402.1	PgGF14-23	GO:0061062	Biological process	regulation of nematode larval development
Pg_S2402.1	PgGF14-23	GO:0048608	Biological process	reproductive structure development
Pg_S2402.1	PgGF14-23	GO:0046686	Biological process	response to cadmium ion
Pg_S2402.1	PgGF14-23	GO:0010218	Biological process	response to far red light
Pg_S2402.1	PgGF14-23	GO:0080167	Biological process	response to karrikin
Pg_S2402.1	PgGF14-23	GO:0009624	Biological process	response to nematode
Pg_S2402.1	PgGF14-23	GO:0010114	Biological process	response to red light
Pg_S2402.1	PgGF14-23	GO:0048364	Biological process	root development
Pg_S2402.1	PgGF14-23	GO:0044710	Biological process	single-organism metabolic process
Pg_S2402.1	PgGF14-23	GO:0005774	Cellular component	vacuolar membrane
Pg_S2402.1	PgGF14-23	GO:0030445	Cellular component	yeast-form cell wall
Pg_S2461.5	PgGF14-9	GO:0006588	Biological process	activation of tryptophan 5-monooxygenase activity
Pg_S2461.5	PgGF14-9	GO:0043090	Biological process	amino acid import
Pg_S2461.5	PgGF14-9	GO:0048046	Cellular component	apoplast
Pg_S2461.5	PgGF14-9	GO:0006915	Biological process	apoptotic process
Pg_S2461.5	PgGF14-9	GO:0005524	Molecular function	ATP binding
Pg_S2461.5	PgGF14-9	GO:0007411	Biological process	axon guidance
Pg_S2461.5	PgGF14-9	GO:0033267	Cellular component	axon part
Pg_S2461.5	PgGF14-9	GO:0009742	Biological process	brassinosteroid mediated signaling pathway
Pg_S2461.5	PgGF14-9	GO:0009986	Cellular component	cell surface
Pg_S2461.5	PgGF14-9	GO:0071216	Biological process	cellular response to biotic stimulus
Pg_S2461.5	PgGF14-9	GO:0034605	Biological process	cellular response to heat
Pg_S2461.5	PgGF14-9	GO:0036244	Biological process	cellular response to neutral pH
Pg_S2461.5	PgGF14-9	GO:0021987	Biological process	cerebral cortex development
Pg_S2461.5	PgGF14-9	GO:0001410	Biological process	chlamydospore formation
Pg_S2461.5	PgGF14-9	GO:0009570	Cellular component	chloroplast stroma
Pg_S2461.5	PgGF14-9	GO:0005694	Cellular component	chromosome
Pg_S2461.5	PgGF14-9	GO:0005829	Cellular component	cytosol
Pg_S2461.5	PgGF14-9	GO:0008340	Biological process	determination of adult lifespan
Pg_S2461.5	PgGF14-9	GO:0009793	Biological process	embryo development ending in seed dormancy
Pg_S2461.5	PgGF14-9	GO:0006888	Biological process	ER to Golgi vesicle-mediated transport
Pg_S2461.5	PgGF14-9	GO:0036180	Biological process	filamentous growth of a population of unicellular organisms in response to biotic stimulus
Pg_S2461.5	PgGF14-9	GO:0036168	Biological process	filamentous growth of a population of unicellular organisms in response to heat
Pg_S2461.5	PgGF14-9	GO:0036178	Biological process	filamentous growth of a population of unicellular organisms in response to neutral pH
Pg_S2461.5	PgGF14-9	GO:0048449	Biological process	floral organ formation
Pg_S2461.5	PgGF14-9	GO:0000086	Biological process	G2/M transition of mitotic cell cycle
Pg_S2461.5	PgGF14-9	GO:0007294	Biological process	germarium-derived oocyte fate determination
Pg_S2461.5	PgGF14-9	GO:0045172	Cellular component	germline ring canal
Pg_S2461.5	PgGF14-9	GO:0005794	Cellular component	Golgi apparatus
Pg_S2461.5	PgGF14-9	GO:0035329	Biological process	hippo signaling cascade
Pg_S2461.5	PgGF14-9	GO:0021766	Biological process	hippocampus development
Pg_S2461.5	PgGF14-9	GO:0042826	Molecular function	histone deacetylase binding
Pg_S2461.5	PgGF14-9	GO:0016570	Biological process	histone modification
Pg_S2461.5	PgGF14-9	GO:0016818	Molecular function	hydrolase activity, acting on acid anhydrides, in phosphorus-containing anhydrides
Pg_S2461.5	PgGF14-9	GO:0005871	Cellular component	kinesin complex
Pg_S2461.5	PgGF14-9	GO:0009965	Biological process	leaf morphogenesis
Pg_S2461.5	PgGF14-9	GO:0042470	Cellular component	melanosome
Pg_S2461.5	PgGF14-9	GO:0005739	Cellular component	mitochondrion
Pg_S2461.5	PgGF14-9	GO:0007095	Biological process	mitotic G2 DNA damage checkpoint
Pg_S2461.5	PgGF14-9	GO:0004497	Molecular function	monooxygenase activity
Pg_S2461.5	PgGF14-9	GO:0035308	Biological process	negative regulation of protein dephosphorylation
Pg_S2461.5	PgGF14-9	GO:0001764	Biological process	neuron migration
Pg_S2461.5	PgGF14-9	GO:0048011	Biological process	neurotrophin TRK receptor signaling pathway
Pg_S2461.5	PgGF14-9	GO:0046958	Biological process	nonassociative learning
Pg_S2461.5	PgGF14-9	GO:0005635	Cellular component	nuclear envelope
Pg_S2461.5	PgGF14-9	GO:0008103	Biological process	oocyte microtubule cytoskeleton polarization
Pg_S2461.5	PgGF14-9	GO:0055114	Biological process	oxidation-reduction process
Pg_S2461.5	PgGF14-9	GO:0009405	Biological process	pathogenesis
Pg_S2461.5	PgGF14-9	GO:0004623	Molecular function	phospholipase A2 activity
Pg_S2461.5	PgGF14-9	GO:0050815	Molecular function	phosphoserine binding
Pg_S2461.5	PgGF14-9	GO:0005886	Cellular component	plasma membrane
Pg_S2461.5	PgGF14-9	GO:0009506	Cellular component	plasmodesma
Pg_S2461.5	PgGF14-9	GO:0007280	Biological process	pole cell migration
Pg_S2461.5	PgGF14-9	GO:1900445	Biological process	positive regulation of filamentous growth of a population of unicellular organisms in response to biotic stimulus
Pg_S2461.5	PgGF14-9	GO:1900442	Biological process	positive regulation of filamentous growth of a population of unicellular organisms in response to neutral pH
Pg_S2461.5	PgGF14-9	GO:0032403	Molecular function	protein complex binding
Pg_S2461.5	PgGF14-9	GO:0019904	Molecular function	protein domain specific binding
Pg_S2461.5	PgGF14-9	GO:0006486	Biological process	protein glycosylation
Pg_S2461.5	PgGF14-9	GO:0046982	Molecular function	protein heterodimerization activity
Pg_S2461.5	PgGF14-9	GO:0008426	Molecular function	protein kinase C inhibitor activity
Pg_S2461.5	PgGF14-9	GO:0006605	Biological process	protein targeting
Pg_S2461.5	PgGF14-9	GO:0007265	Biological process	Ras protein signal transduction
Pg_S2461.5	PgGF14-9	GO:0006109	Biological process	regulation of carbohydrate metabolic process
Pg_S2461.5	PgGF14-9	GO:0009909	Biological process	regulation of flower development
Pg_S2461.5	PgGF14-9	GO:0007088	Biological process	regulation of mitosis
Pg_S2461.5	PgGF14-9	GO:0061062	Biological process	regulation of nematode larval development
Pg_S2461.5	PgGF14-9	GO:0006355	Biological process	regulation of transcription, DNA-dependent
Pg_S2461.5	PgGF14-9	GO:0009737	Biological process	response to abscisic acid stimulus
Pg_S2461.5	PgGF14-9	GO:0046686	Biological process	response to cadmium ion
Pg_S2461.5	PgGF14-9	GO:0010218	Biological process	response to far red light
Pg_S2461.5	PgGF14-9	GO:0080167	Biological process	response to karrikin
Pg_S2461.5	PgGF14-9	GO:0009624	Biological process	response to nematode
Pg_S2461.5	PgGF14-9	GO:0010114	Biological process	response to red light
Pg_S2461.5	PgGF14-9	GO:0009411	Biological process	response to UV
Pg_S2461.5	PgGF14-9	GO:0048364	Biological process	root development
Pg_S2461.5	PgGF14-9	GO:0010162	Biological process	seed dormancy process
Pg_S2461.5	PgGF14-9	GO:0009845	Biological process	seed germination
Pg_S2461.5	PgGF14-9	GO:0009407	Biological process	toxin catabolic process
Pg_S2461.5	PgGF14-9	GO:0005774	Cellular component	vacuolar membrane
Pg_S2461.5	PgGF14-9	GO:0019048	Biological process	virus-host interaction
Pg_S2461.5	PgGF14-9	GO:0048190	Biological process	wing disc dorsal/ventral pattern formation
Pg_S2461.5	PgGF14-9	GO:0030445	Cellular component	yeast-form cell wall
Pg_S2535.1	PgGF14-12	GO:0006588	Biological process	activation of tryptophan 5-monooxygenase activity
Pg_S2535.1	PgGF14-12	GO:0048046	Cellular component	apoplast
Pg_S2535.1	PgGF14-12	GO:0006915	Biological process	apoptotic process
Pg_S2535.1	PgGF14-12	GO:0005524	Molecular function	ATP binding
Pg_S2535.1	PgGF14-12	GO:0007411	Biological process	axon guidance
Pg_S2535.1	PgGF14-12	GO:0033267	Cellular component	axon part
Pg_S2535.1	PgGF14-12	GO:0009742	Biological process	brassinosteroid mediated signaling pathway
Pg_S2535.1	PgGF14-12	GO:1901137	Biological process	carbohydrate derivative biosynthetic process
Pg_S2535.1	PgGF14-12	GO:0005618	Cellular component	cell wall
Pg_S2535.1	PgGF14-12	GO:0034645	Biological process	cellular macromolecule biosynthetic process
Pg_S2535.1	PgGF14-12	GO:0006464	Biological process	cellular protein modification process
Pg_S2535.1	PgGF14-12	GO:0021987	Biological process	cerebral cortex development
Pg_S2535.1	PgGF14-12	GO:0009570	Cellular component	chloroplast stroma
Pg_S2535.1	PgGF14-12	GO:0005694	Cellular component	chromosome
Pg_S2535.1	PgGF14-12	GO:0005829	Cellular component	cytosol
Pg_S2535.1	PgGF14-12	GO:0008340	Biological process	determination of adult lifespan
Pg_S2535.1	PgGF14-12	GO:0009793	Biological process	embryo development ending in seed dormancy
Pg_S2535.1	PgGF14-12	GO:0000086	Biological process	G2/M transition of mitotic cell cycle
Pg_S2535.1	PgGF14-12	GO:0007294	Biological process	germarium-derived oocyte fate determination
Pg_S2535.1	PgGF14-12	GO:0045172	Cellular component	germline ring canal
Pg_S2535.1	PgGF14-12	GO:0005794	Cellular component	Golgi apparatus
Pg_S2535.1	PgGF14-12	GO:0035329	Biological process	hippo signaling cascade
Pg_S2535.1	PgGF14-12	GO:0021766	Biological process	hippocampus development
Pg_S2535.1	PgGF14-12	GO:0042826	Molecular function	histone deacetylase binding
Pg_S2535.1	PgGF14-12	GO:0016818	Molecular function	hydrolase activity, acting on acid anhydrides, in phosphorus-containing anhydrides
Pg_S2535.1	PgGF14-12	GO:0005871	Cellular component	kinesin complex
Pg_S2535.1	PgGF14-12	GO:0009965	Biological process	leaf morphogenesis
Pg_S2535.1	PgGF14-12	GO:0005739	Cellular component	mitochondrion
Pg_S2535.1	PgGF14-12	GO:0007095	Biological process	mitotic G2 DNA damage checkpoint
Pg_S2535.1	PgGF14-12	GO:0004497	Molecular function	monooxygenase activity
Pg_S2535.1	PgGF14-12	GO:0043581	Biological process	mycelium development
Pg_S2535.1	PgGF14-12	GO:0035308	Biological process	negative regulation of protein dephosphorylation
Pg_S2535.1	PgGF14-12	GO:0001764	Biological process	neuron migration
Pg_S2535.1	PgGF14-12	GO:0048011	Biological process	neurotrophin TRK receptor signaling pathway
Pg_S2535.1	PgGF14-12	GO:0046958	Biological process	nonassociative learning
Pg_S2535.1	PgGF14-12	GO:0005635	Cellular component	nuclear envelope
Pg_S2535.1	PgGF14-12	GO:0008103	Biological process	oocyte microtubule cytoskeleton polarization
Pg_S2535.1	PgGF14-12	GO:0004623	Molecular function	phospholipase A2 activity
Pg_S2535.1	PgGF14-12	GO:0050815	Molecular function	phosphoserine binding
Pg_S2535.1	PgGF14-12	GO:0005886	Cellular component	plasma membrane
Pg_S2535.1	PgGF14-12	GO:0009506	Cellular component	plasmodesma
Pg_S2535.1	PgGF14-12	GO:0007280	Biological process	pole cell migration
Pg_S2535.1	PgGF14-12	GO:0045927	Biological process	positive regulation of growth
Pg_S2535.1	PgGF14-12	GO:0032403	Molecular function	protein complex binding
Pg_S2535.1	PgGF14-12	GO:0019904	Molecular function	protein domain specific binding
Pg_S2535.1	PgGF14-12	GO:0046982	Molecular function	protein heterodimerization activity
Pg_S2535.1	PgGF14-12	GO:0008426	Molecular function	protein kinase C inhibitor activity
Pg_S2535.1	PgGF14-12	GO:0006605	Biological process	protein targeting
Pg_S2535.1	PgGF14-12	GO:0007265	Biological process	Ras protein signal transduction
Pg_S2535.1	PgGF14-12	GO:0007088	Biological process	regulation of mitosis
Pg_S2535.1	PgGF14-12	GO:0061062	Biological process	regulation of nematode larval development
Pg_S2535.1	PgGF14-12	GO:0006355	Biological process	regulation of transcription, DNA-dependent
Pg_S2535.1	PgGF14-12	GO:0009737	Biological process	response to abscisic acid stimulus
Pg_S2535.1	PgGF14-12	GO:0046686	Biological process	response to cadmium ion
Pg_S2535.1	PgGF14-12	GO:0010218	Biological process	response to far red light
Pg_S2535.1	PgGF14-12	GO:0080167	Biological process	response to karrikin
Pg_S2535.1	PgGF14-12	GO:0009624	Biological process	response to nematode
Pg_S2535.1	PgGF14-12	GO:0010114	Biological process	response to red light
Pg_S2535.1	PgGF14-12	GO:0009411	Biological process	response to UV
Pg_S2535.1	PgGF14-12	GO:0048364	Biological process	root development
Pg_S2535.1	PgGF14-12	GO:0010162	Biological process	seed dormancy process
Pg_S2535.1	PgGF14-12	GO:0009845	Biological process	seed germination
Pg_S2535.1	PgGF14-12	GO:0044723	Biological process	single-organism carbohydrate metabolic process
Pg_S2535.1	PgGF14-12	GO:0009407	Biological process	toxin catabolic process
Pg_S2535.1	PgGF14-12	GO:0005774	Cellular component	vacuolar membrane
Pg_S2535.1	PgGF14-12	GO:0048190	Biological process	wing disc dorsal/ventral pattern formation
Pg_S2588.15	PgGF14-33	GO:0006915	Biological process	apoptotic process
Pg_S2588.15	PgGF14-33	GO:0030437	Biological process	ascospore formation
Pg_S2588.15	PgGF14-33	GO:0005524	Molecular function	ATP binding
Pg_S2588.15	PgGF14-33	GO:0007411	Biological process	axon guidance
Pg_S2588.15	PgGF14-33	GO:0033267	Cellular component	axon part
Pg_S2588.15	PgGF14-33	GO:0009742	Biological process	brassinosteroid mediated signaling pathway
Pg_S2588.15	PgGF14-33	GO:0005509	Molecular function	calcium ion binding
Pg_S2588.15	PgGF14-33	GO:0021987	Biological process	cerebral cortex development
Pg_S2588.15	PgGF14-33	GO:0009570	Cellular component	chloroplast stroma
Pg_S2588.15	PgGF14-33	GO:0005694	Cellular component	chromosome
Pg_S2588.15	PgGF14-33	GO:0019344	Biological process	cysteine biosynthetic process
Pg_S2588.15	PgGF14-33	GO:0005829	Cellular component	cytosol
Pg_S2588.15	PgGF14-33	GO:0008340	Biological process	determination of adult lifespan
Pg_S2588.15	PgGF14-33	GO:0006270	Biological process	DNA replication initiation
Pg_S2588.15	PgGF14-33	GO:0003688	Molecular function	DNA replication origin binding
Pg_S2588.15	PgGF14-33	GO:0034221	Biological process	fungal-type cell wall chitin biosynthetic process
Pg_S2588.15	PgGF14-33	GO:0000086	Biological process	G2/M transition of mitotic cell cycle
Pg_S2588.15	PgGF14-33	GO:0007294	Biological process	germarium-derived oocyte fate determination
Pg_S2588.15	PgGF14-33	GO:0045172	Cellular component	germline ring canal
Pg_S2588.15	PgGF14-33	GO:0006096	Biological process	glycolysis
Pg_S2588.15	PgGF14-33	GO:0007030	Biological process	Golgi organization
Pg_S2588.15	PgGF14-33	GO:0035329	Biological process	hippo signaling cascade
Pg_S2588.15	PgGF14-33	GO:0021766	Biological process	hippocampus development
Pg_S2588.15	PgGF14-33	GO:0042826	Molecular function	histone deacetylase binding
Pg_S2588.15	PgGF14-33	GO:0042744	Biological process	hydrogen peroxide catabolic process
Pg_S2588.15	PgGF14-33	GO:0016818	Molecular function	hydrolase activity, acting on acid anhydrides, in phosphorus-containing anhydrides
Pg_S2588.15	PgGF14-33	GO:0006972	Biological process	hyperosmotic response
Pg_S2588.15	PgGF14-33	GO:0019288	Biological process	isopentenyl diphosphate biosynthetic process, mevalonate-independent pathway
Pg_S2588.15	PgGF14-33	GO:0005871	Cellular component	kinesin complex
Pg_S2588.15	PgGF14-33	GO:0048366	Biological process	leaf development
Pg_S2588.15	PgGF14-33	GO:0042470	Cellular component	melanosome
Pg_S2588.15	PgGF14-33	GO:0005739	Cellular component	mitochondrion
Pg_S2588.15	PgGF14-33	GO:0007095	Biological process	mitotic G2 DNA damage checkpoint
Pg_S2588.15	PgGF14-33	GO:0004497	Molecular function	monooxygenase activity
Pg_S2588.15	PgGF14-33	GO:0035308	Biological process	negative regulation of protein dephosphorylation
Pg_S2588.15	PgGF14-33	GO:0051436	Biological process	negative regulation of ubiquitin-protein ligase activity involved in mitotic cell cycle
Pg_S2588.15	PgGF14-33	GO:0001764	Biological process	neuron migration
Pg_S2588.15	PgGF14-33	GO:0048011	Biological process	neurotrophin TRK receptor signaling pathway
Pg_S2588.15	PgGF14-33	GO:0046958	Biological process	nonassociative learning
Pg_S2588.15	PgGF14-33	GO:0005634	Cellular component	nucleus
Pg_S2588.15	PgGF14-33	GO:0008103	Biological process	oocyte microtubule cytoskeleton polarization
Pg_S2588.15	PgGF14-33	GO:0055114	Biological process	oxidation-reduction process
Pg_S2588.15	PgGF14-33	GO:0050815	Molecular function	phosphoserine binding
Pg_S2588.15	PgGF14-33	GO:0005886	Cellular component	plasma membrane
Pg_S2588.15	PgGF14-33	GO:0009506	Cellular component	plasmodesma
Pg_S2588.15	PgGF14-33	GO:0007280	Biological process	pole cell migration
Pg_S2588.15	PgGF14-33	GO:0045927	Biological process	positive regulation of growth
Pg_S2588.15	PgGF14-33	GO:0048528	Biological process	post-embryonic root development
Pg_S2588.15	PgGF14-33	GO:0006267	Biological process	pre-replicative complex assembly
Pg_S2588.15	PgGF14-33	GO:0032403	Molecular function	protein complex binding
Pg_S2588.15	PgGF14-33	GO:0019904	Molecular function	protein domain specific binding
Pg_S2588.15	PgGF14-33	GO:0046982	Molecular function	protein heterodimerization activity
Pg_S2588.15	PgGF14-33	GO:0008426	Molecular function	protein kinase C inhibitor activity
Pg_S2588.15	PgGF14-33	GO:0006605	Biological process	protein targeting
Pg_S2588.15	PgGF14-33	GO:0007124	Biological process	pseudohyphal growth
Pg_S2588.15	PgGF14-33	GO:0007265	Biological process	Ras protein signal transduction
Pg_S2588.15	PgGF14-33	GO:0007088	Biological process	regulation of mitosis
Pg_S2588.15	PgGF14-33	GO:0032880	Biological process	regulation of protein localization
Pg_S2588.15	PgGF14-33	GO:0006355	Biological process	regulation of transcription, DNA-dependent
Pg_S2588.15	PgGF14-33	GO:0009737	Biological process	response to abscisic acid stimulus
Pg_S2588.15	PgGF14-33	GO:0046686	Biological process	response to cadmium ion
Pg_S2588.15	PgGF14-33	GO:0009750	Biological process	response to fructose stimulus
Pg_S2588.15	PgGF14-33	GO:0009651	Biological process	response to salt stress
Pg_S2588.15	PgGF14-33	GO:0009266	Biological process	response to temperature stimulus
Pg_S2588.15	PgGF14-33	GO:0009411	Biological process	response to UV
Pg_S2588.15	PgGF14-33	GO:0001402	Biological process	signal transduction involved in filamentous growth
Pg_S2588.15	PgGF14-33	GO:0019048	Biological process	virus-host interaction
Pg_S2588.15	PgGF14-33	GO:0006833	Biological process	water transport
Pg_S2588.15	PgGF14-33	GO:0048190	Biological process	wing disc dorsal/ventral pattern formation
Pg_S2708.12	PgGF14-20	GO:0006588	Biological process	activation of tryptophan 5-monooxygenase activity
Pg_S2708.12	PgGF14-20	GO:0043090	Biological process	amino acid import
Pg_S2708.12	PgGF14-20	GO:0048046	Cellular component	apoplast
Pg_S2708.12	PgGF14-20	GO:0006915	Biological process	apoptotic process
Pg_S2708.12	PgGF14-20	GO:0005524	Molecular function	ATP binding
Pg_S2708.12	PgGF14-20	GO:0007411	Biological process	axon guidance
Pg_S2708.12	PgGF14-20	GO:0033267	Cellular component	axon part
Pg_S2708.12	PgGF14-20	GO:0009742	Biological process	brassinosteroid mediated signaling pathway
Pg_S2708.12	PgGF14-20	GO:0009986	Cellular component	cell surface
Pg_S2708.12	PgGF14-20	GO:0071216	Biological process	cellular response to biotic stimulus
Pg_S2708.12	PgGF14-20	GO:0034605	Biological process	cellular response to heat
Pg_S2708.12	PgGF14-20	GO:0036244	Biological process	cellular response to neutral pH
Pg_S2708.12	PgGF14-20	GO:0021987	Biological process	cerebral cortex development
Pg_S2708.12	PgGF14-20	GO:0001410	Biological process	chlamydospore formation
Pg_S2708.12	PgGF14-20	GO:0009570	Cellular component	chloroplast stroma
Pg_S2708.12	PgGF14-20	GO:0005694	Cellular component	chromosome
Pg_S2708.12	PgGF14-20	GO:0005829	Cellular component	cytosol
Pg_S2708.12	PgGF14-20	GO:0008340	Biological process	determination of adult lifespan
Pg_S2708.12	PgGF14-20	GO:0009793	Biological process	embryo development ending in seed dormancy
Pg_S2708.12	PgGF14-20	GO:0006888	Biological process	ER to Golgi vesicle-mediated transport
Pg_S2708.12	PgGF14-20	GO:0036180	Biological process	filamentous growth of a population of unicellular organisms in response to biotic stimulus
Pg_S2708.12	PgGF14-20	GO:0036168	Biological process	filamentous growth of a population of unicellular organisms in response to heat
Pg_S2708.12	PgGF14-20	GO:0036178	Biological process	filamentous growth of a population of unicellular organisms in response to neutral pH
Pg_S2708.12	PgGF14-20	GO:0048449	Biological process	floral organ formation
Pg_S2708.12	PgGF14-20	GO:0000086	Biological process	G2/M transition of mitotic cell cycle
Pg_S2708.12	PgGF14-20	GO:0007294	Biological process	germarium-derived oocyte fate determination
Pg_S2708.12	PgGF14-20	GO:0045172	Cellular component	germline ring canal
Pg_S2708.12	PgGF14-20	GO:0005794	Cellular component	Golgi apparatus
Pg_S2708.12	PgGF14-20	GO:0035329	Biological process	hippo signaling cascade
[truncated: 852 more rows]

## Sheet: GO.txt.Level2.count
GO enrichment information of PgGF14s
GO ID	Description	Class	Counts	TotalGOid	TotalGeneAnnotated
GO:0009058	biosynthetic process	biological_process	41	701	42
GO:0048869	cellular developmental process	biological_process	42	701	42
GO:0044237	cellular metabolic process	biological_process	42	701	42
GO:0009628	response to abiotic stimulus	biological_process	41	701	42
GO:0019748	secondary metabolic process	biological_process	28	701	42
GO:0044238	primary metabolic process	biological_process	42	701	42
GO:0016049	cell growth	biological_process	23	701	42
GO:0070085	glycosylation	biological_process	27	701	42
GO:0051716	cellular response to stimulus	biological_process	41	701	42
GO:0008219	cell death	biological_process	36	701	42
GO:0009607	response to biotic stimulus	biological_process	30	701	42
GO:0016032	viral process	biological_process	30	701	42
GO:0032501	multicellular organismal process	biological_process	42	701	42
GO:0016491	oxidoreductase activity	molecular_function	33	701	42
GO:0044877	protein-containing complex binding	molecular_function	36	701	42
GO:0003824	catalytic activity	molecular_function	40	701	42
GO:0098772	molecular function regulator activity	molecular_function	40	701	42
GO:0005737	cytoplasm	cellular_component	41	701	42
GO:0110165	cellular anatomical entity	cellular_component	42	701	42
GO:0012505	endomembrane system	cellular_component	37	701	42
