# Supplementary material for: Molecular analysis of the 14-3-3 genes in Panax ginseng and their responses to heat stress
Source: PeerJ. 2023 May 9;11:e15331. doi: 10.7717/peerj.15331 (PMC10178371; doi:10.7717/peerj.15331)
Supplement: Supplemental Information 5 — The protein sequences of all genes used to construct the evolutionary tree. [file peerj-11-15331-s005.xlsx]

## Sheet: Sheet1
Multiple species 14-3-3 protein FASTA sequences
Gene name	Squence
>GhGF14-01	MAATSPREENVYKAKLAEQAERYEEMVRFMETVVSSVVAPDELTVEERNLLSVAYKNVIGARRASWRIVSSIEQKEEGRGNADHVSIIREYRAKIEAELSDICAGILKLLEEKLVPAAGNGDSKVFYLKMKGDYHRYLAEFKTGDDRKAAAENTLSAYKSAQDIAVSELAPTHPIRLGLALNFSVFYYEILNSPDRACSLAKQAFDEAISELDTLGEDSYKDSTLIMQLLRDNLTLWTSDMQEDGTDEIKEASKPEDEKQQ
>GhGF14-02	MAATSPSSREEFVYMAKLAEQAERYDEMVELMEKVSSSSESEELSVEERNLLSVAYKNVIGARRASWRIVSSIEQKEESRGNEDHVTLIRDYRAKIESELSSICGGILKLLDSRLIPSAAAKDSKVFYLKMKGDYHRYLAEFKTGAERKEAAESTLTAYKSAQDIANAELAPTHPIRLGLALNFSVFYYEILNSPDRACNLAKQAFDEAIAELDTLGEESYKDSTLIMQLLRDNLTLWTSDLQDDGADEIKEAPKQEEEQKKQPEQPKQ
>GhGF14-03	MATTVTGNLSRDQYVYLAKLSEQAERYEEMLQFMQKLVLGSTPAAELTVEERNLLSVAYKNVIGSLRAAWRIVSSIEQKEEGRKNEEHVVLVKEYRSKIESELSEVCASILTLLESNLILSATASESKVFYLKMKGDYHRYLAEFKVGDERKAAAEDTMLSYKAAQDIALEDLAPTHPIRLGLALNFSVFYYEILNQSDKACSMAKQAFEEAIAELDTLGEESYKDSTLIMQLLRDNLTLWTSDVQDQLDEP
>GhGF14-04	MATPSAREENVYLAKLAEQAERYEEMVKFMENVVSAVPAPDELTVEERNLLSVAYKNVIGARRASWRIVSSIEQKEEGRGNADHVSVIREYRAKIEAELSEICAGILKLLDEKLVPAAGTGDSKVFYLKMKGDYHRYLAEFKTGDDRKAAAENTLTAYKSAQDIANAELAPTHPIRLGLALNFSVFYYEILNSPDRACTLAKQAFDEAIAELDTLGEDSYKDSTLIMQLLRDNLTLWTSDMQDDGTDEIKEAPKQEDEKQP
>GhGF14-05	MATPSPREENVYMAKLAEQAERYEEMVKFMENVVSAVPAPDELSVEERNLLSVAYKNVIGARRASWRIVSSIEQKEEGRGNADHVAVIRDYRAKIEAELSEICAGILKLLDENLVPAAGNGDSKVFYLKMKGDYHRYLAEFKTGDDRKSAAENTLTAYKSAQDIAVAELAPTHPIRLGLALNFSVFYYEILNSPDRACSLAKQAFDEAIAELDTLGEDSYKDSTLIMQLLRDNLTLWTSDMQDDGTDEIKEASKPEEEKQP
>GhGF14-06	MDFSKERESFVYIAKLAEQAERFDDMVTSMKKLAELDVELTVEERNLLSVGYKNVIGARRASWRILSSIEQKEESKGNEQNVKKIKTYRQKVESELSNICKDIMGVINEHLIPSCLGGESTVFYYKMKGDYYRYLAEFKMGDERKEAADQSMKAYQATEAELPPTHPIRLGLALNFSVFYYEIMNSPERACHLAKQAFDEAISELDTLSEESYKDSTLIMQLLRDNLTLWTSDIPEDGEEAAKLGAAKVGEGDE
>GhGF14-07	MATMVPDNLSRDQYVYLAKLAEQAERYEEMVQFMQKLVLGSTPASELTVEERNLLSVAYKNVIGSLRAAWRIVSSIEQKEEGRKNEEHVVLVKEYRSKVESELSDVCASILTLLDSNLIPSAAASESKVFYLKMKGDYHRYLAEFKVGDERKAAAEDTMLSYKAAQDIALTDLAPTHPIRLGLALNYSVFYYEILNQSDKACSMAKQAFEEAIAELDTLGEESYKDSTLIMQLLRDNLTLWTSDVQDQLDEP
>GhGF14-08	MAAAATSSPREENVYMAKLAEQAERYEEMVEFMEKVSASADNEELTVEERNLLSVAYKNVIGARRASWRIISSIEQKEESRGNDDHVATIRDYRAKIESELTSICNGILKLLDTRLVPSASSGDSKVFYLKMKGDYHRYLAEFKTGAERKEAAESTLTAYKSAQDIANAELAPTHPIRLGLALNFSVFYYEILNSPDRACNLAKQAFDEAIAELDTLGEESYKDSTLIMQLLRDNLTLWTSDMQDDGADDIKEAPKRDEQEQQQKPEQ
>GhGF14-09	MEKEREQQVYLARLAEQAERYDEMVEAMKSVAKLDVELTVEERNLLSVGYKNVIGARRASWRILSSIEQKEEAKGNEQNVKRIKDYRQRVEDELSKICNDILSVIDKHLIPSSSTGESTVFYYKMKGDYFRYLAEFKAGDDRKEAADQSLKAYEAATSTASSDLPPTHPIRLGLALNFSVFYYEILNSPERACHLAKQAFDEAIAELDSLNEESYKDSTLIMQLLRDNLTLWTSDLPEEGGEQSKADEPQAES
>GhGF14-10	MATTKTPSTREEHVYMAKLAEQAERYDEMVEFMEKVSACAENEELSVEERNLLSVAYKNVIGARRASWRIISSIEQKEESRGNEEHVAKIRDYRAKIESELSSISDGILKLLDKRLIPAASAAESKVFYLKMKGDYHRYLAEFKAGAERKEAAESTLSAYKSAQDIATAELPPTHPIRLGLALNFSVFYYEILNSPDRACNLAKQAFDEAIAELDTLGEESYKDSTLIMQLLRDNLTLWTSDLQDDGADEIKEAAKQEEEEKQPKQ
>GhGF14-11	MAAATREENVYMAKLAEQAERYEEMVDFMEKVSASAADNEGLTIEERNLLSVAYKNVIGARRASWRIISSIEQKEESRGNEDHVAVIRDYRAKIESELSSICGGILKLLDTTLIPSASGGDSKVFYLKMKGDYHRYLAEFKTSAERKEAAESTLTAYKSAQEIANAELAPTHPIRLGLALNFSVFYYEILNSPDRACELAKQAFDEAIAELDTLGEESYKDSTLIMQLLRDNLTLWTSDMQGDDEIKEAAKREEEEQQ
>GhGF14-12	MEREQQVYLARLAEQAERYDEMVEAMKNVAKLDVELTVEERNLLSVGYKNVIGARRASWRILSSIEQKEEAKGNEQNVKRIKEYRQRVEDELAKICDDILSVIDKHLIPSSSTGESTVFYYKMKGDYFRYLAEFKAGEDRKEAADQSLKAYEAATTTANSDLPPTHPIRLGLALNFSVFYYEILNSAERACHLAKQAFDEAIAELDSLNEESYKDSTLIMQLLRDNLTLWTSDLPEEGGEQSKGDEPQAES
>GhGF14-13	MSPTESSREENVYMAKLAEQAERYEEMVEFMEEVAKTVDVEELTVEERNLLSVAYKNVIGARRASWRIISSIEQKEESRGNEDHVAQLKEYRGKIEAELSKICDGILSLLESHLIPLASSAESKVFYLKMKGDYHRYLAEFKTGAERKEAAESTLLAYKSAQDIALAELAPTHPIRLGLALNFSVFYYEILNSPDRACNLAKQAFDEAISELDTLGEESYKDSTLIMQLLRDNLTLWTSDITDEAGDEIKEASKHESGEGQQ
>GhGF14-14	MSPTESSREENVYMAKLAEQAERYEEMVEFMENVAKTVDVGELTVEERNLLSVAYKNVIGARRASWRIISSIEQKEESRGNEDHVATIKEYRSKIEAELSKICDGILSLLESHLIPSASSAESKVFYLKMKGDYHRYLAEFKTGAERKEAAESTLLAYKSAQDIALGDLAPTHPIRLGLALNFSVFYYEILNSPDRACNLAKQAFDEAISELDTLGEESYKDSTLIMQLLRDNLTLWTSDITDEAGDEIKEASKPESGEGQQ
>GhGF14-15	MATSSPREDNVYMAKLAEQAERYEEMVKFMETVVSAVPSSDELSVEERNLLSVAYKNVIGARRASWRIVSSIEQKEEERGNADHVSVIREYRAKIEAELSEICAGILKLLDEKLVPAAKTGDSKVFYLKMKGDYHRYLAEFKTGDDRKAAAENTLTAYKSAQEIATSELAPTHPIRLGLALNFSVFYYEILNSPDRACSLAKQAFDEAISELDTLGEDSYKDSTLIMQLLRDNLTLWTSDMQDDATDEIKEAPKREEEKQE
>GhGF14-16	MKKVAKLDCELTVEERNLLSVGYKNVIGARRASWRIMSSIEQKEESKGNEENVKLIKGYRRKVEEELSNICTDILSTIDKHLIPSSSSGEATVFYYKMKGDYYRYVAEFKTDQERKEAAEQSLKGYEAASAAANTDLPSTHPIRLGLALNFSVFYYEIMNSPERACHLAKQAFDEAISELDTLSEESYKDSTLIMQLLRDNLTLWTSDLPEDGGEDTVKGDDTKSVAKSEAKAEKH
>GhGF14-17	MAATSPREENVYKAKLAEQAERYEEMVKFMETVVSSVVAPDELTVEERNLLSVAYKNVIGARRASWRIVSSIEQKEEGRGNADHVSIIREYRAKIEAELSEICAGILKLLEEKLVPAAGNGDSKVFYLKMKGDYHRYLAEFKTGDDRKAAAENTLSAYKSAQDIAVSELAPTHPIRLGLALNFSVFYYEILNSPDRACSLAKQAFDEAISELDTLGEDSYKDSTLIMQLLRDNLTLWTSDMQEDGTEEIKEASKPEDEKQQ
>GhGF14-18	MAASTPSSREEFVYMAKLAEQAERYDEMVEFMEKASASAESEELSVEERNLLSVAYKNVIGARRASWRIVSSIEQKEESRGNEDHVTLIRDYRAKIESELSSICGGILKLLDSRLIPSAAAKDSKVFYLKMKGDYHRYLAEFKTGAERKEAAESTLTAYKSAQDIANAELAPTHPIRLGLALNFSVFYYEILNSPDRACNLAKQAFDEAIAELDTLGEESYKDSTLIMQLLRDNLTLWTSDLQDDGTDEIKEAPKQEEEQQKQPEQPKQ
>GhGF14-19	MATTAPDNLSRDQYVYLAKLSEQAERYEEMVQFMQKLVLGSTPAAELTVEERNLLSVAYKNVIGSLRAAWRIVSSIEQKEEGRKNEEHVVLVKEYKSKIESELSEVCASILTLLESNLIPSATASESKVFYLKMKGDYHRYLAEFKVGDERKAAAEDTMLSYKAAQDIALADLAPTHPIRLGLALNFSVFYYEILNQSDKACSMAKQAFEEAIAELDTLGEESYKDSTLIMQLLRDNLTLWTSDVQDQLDEP
>GhGF14-20	MATPSARDENVYLAKLAEQAERYEEMVKFMENVVSAVPAPDELTVEERNLLSVAYKNVIGARRASWRIVSSIEQKEEGRGNADHVSVIREYRAKIEAELSEICAGILKLLDEKLVPAAGTGDSKVFYLKMKGDYHRYLAEFKTGDDRKAAAENTLTAYKSAQDIANAELAPTHPIRLGLALNFSVFYYEILNSPDRACTLAKQAFDEAIAELDTLGEDSYKDSTLIMQLLRDNLTLWTSDMQDDGTDEIKEAPKQEDEKQP
>GhGF14-21	MATPSPREENVYMAKLAEQAERYEEMVKFMENVVSAVPAPDELSVEERNLLSVAYKNVIGARRASWRIVSSIEQKEEGRGNADHVAVIRDYRAKIEAELSEICAGILKLLDEKLVPAAGNGDSKVFYLKMKGDYHRYLAEFKTGDDRKSAAENTLTAYKSAQDIAVAELAPTHPIRLGLALNFSVFYYEILNSPDRACSLAKQAFDEAIAELDTLGEDSYKDSTLIMQLLRDNLTLWTSDMQDDGTDEIKEASKPEEEKQP
>GhGF14-22	MDFSKERERFVYIAKLAEQAERFDDMVTSMKKLAELDVELTVEERNLLSVGYKNVIGARRASWRILSSIEQKEESKGNEQNVKKIKTSRQKVESELSNICKDIMGVINEHLIPSCSGGESTGFYYKMKGDYYRYLAEFKMGDERKEAADQSMKAYQSATTTAEAELPPTHPIRLGLALNFSVFYYEIMNSPERACHLAKQAFDEAISELDTLSEESYKDSTLIMQLLRDNLTLWTSDIPEDGEEAAKLGAAKVGEGDE
>GhGF14-23	MATMVPDNLSRDQYVYLAKLAEQAERYEEMVQFMQKLVLGSTPASELTVEERNLLSVAYKNVIGSLRAAWRIVSSIEQKEEGRKNEEHVVLVKEYRSKVESELSDVCASILTLLDSNLIPSAAASESKVFYLKMKGDYHRYLAEFKVGDERKAAAEDTMLSYKAAQDIALTDLAPTHPIRLGLALNYSVFYYEILNQSDKACSMAKQAFEEAIAELDTLGEESYKDSTLIMQLLRDNLTLWTSDVQDQLDEP
>GhGF14-24	MAAAATSSPREENVYMAKLAEQAERYEEMVEFMEKVSASADNEELTVEERNLLSVAYKNVIGARRASWRIISSIEQKEESRGNDDHVATIRDYRAKIESELTSICNGILKLLDTRLVPSASSGDSKVFYLKMKGDYHRYLAEFKTGAERKEAAESTLTAYKSAQDIANAELAPTHPIRLGLALNFSVFYYEILNSPDRACNLAKQAFDEAIAELDTLGEESYKDSTLIMQLLRDNLTLWTSDMQDDGADDIKEAPKRDEEEQQQKPQQ
>GhGF14-25	MEKEREQQVYLARLAEQAERYDEMVEAMKSVAKLDVELTVEERNLLSVGYKNVIGARRASWRILSSIEQKEEAKGNEQNVKRIKDYRQRVEDELSKICNDILSVIDKHLIPSSSTGESTVFYYKMKGDYFRYLAEFKAGDDRKEAADQSLKAYEAATSTASSDLPPTHPIRLGLALNFSVFYYEILNSPERACHLAKQAFDEAIAELDSLNEESYKDSTLIMQLLRDNLTLWTSDLPEEGGEQSKADEPQVES
>GhGF14-26	MATTKTPSTREEHVYMAKLAEQAERYDEMVEFMEKVSACAENEELSVEERNLLSVAYKNVIGARRASWWIISSIEQKEESRGNEEYVAKIRDYRAKIESELSSISDGILKLLDKRLIVARKQSKVFYLKMKGDYHRYLAEFKAGAERKEAAESTLSAYKSAQAFDEAIAELDTLGEESYKDSTLIMQLLRDNLTLWTSDLQDDGADEIKEAAKQEEEEKQPKQ
>GhGF14-27	MEREQQVYLARLAEQAERYDEMVEAMKNVAKLDVELTVEERNLLSVGYKNVIGARRASWRILSSIEQKEEAKGNEQNVKRIKEYRQRVEDELSKICDDILSVIDKHLIPSSSTGESTVFYYKMKGDYFRYLAEFKAGDDRKEAADQSLKAYEAATTTANSDLPPTHPIRLGLALNFSVFYYEILNSAERACHLAKQAFDEAIAELDSLNEESYKDSTLIMQLLRDNLTLWTSDLPEEGGEQSKVDEPQAES
>GhGF14-28	MSPTESSREENVYMAKLAEQAERYEEMVEFMEKVAKTVDVEELTVEERNLLSVAYKNVIGARRASWRIISSIEQKEESRGNEDHVAQLKEYRGKIEAELSKICDGILSLLESHLIPLASSAESKVFYLKMKGDYHRYLAEFKTGAERKEAAESTLLAYKSAQDIALAELAPTHPIRLGLALNFSVFYYEILNSPDRACNLAKQAFDEAISELDTLGEESYKDSTLIMQLLRDNLTLWTSDITDEAGDEIKEASKHESGEGQQ
>GhGF14-29	MSSTGSTREENVYMAKLAEQAERYEEMVEFMEKVVKAVNVEELTVEERNLLSVAYKNVIGARRASWRIISSIEQKEESKGNGDHVAIIKEYRGKIEAELSKICDGILSLLESHLIPSASTAESKVFYLKMKGDYHRYLAEFKTGVERKEAAESTLLAYKSAQDIAIVELAPTHPIRLGLALNFSVFYYEILNSPDRACNLAKQAFDDAISELDTLGEESYKDSTLIMQLLRDNLTLWTSDITDEAGDEIKEAPLKPESGEGQQ
>GhGF14-30	MSPTESSREENVYMAKLAEQAERYEEMVEFMENVAKTVDVGELTVEERNLLSVAYKNVIGARRASWRIISSIEQKEESRGNEDHVATIKKYRSKIEAELSKICDGILSLLESHLIPSASSAESKVFYLKMKGDYHRYLAEFKTAAERKEAAESTLLAYKSAQDIALGDLAPTHPIRLGLALNFSVFYYEILNSPDRACNLAKQAFDEAISELDTLGEESYKDSTLIMQLLRDNLTLWTSDITDEAGDEIKEASKPESGEGQQ
>GhGF14-31	MATSSPREDNVYMAKLAEQAERYEEMVKFMETVVSAVPSSDELSVEERNLLSVAYKNVIGARRASWRIVSSIEQKEEGRGNADHVSVIREYRAKIEAELSEICAGILKLLDEKLVPAAKTGDSKVFYLKMKGDYHRYLAEFKTGDDRKAAAENTLTAYKSAQEIATSELAPTHPIRLGLALNFSVFYYEILNSPDRACSLAKQAFDEAISELDTLGEDSYKDSTLIMQLLRDNLTLWTSDMQDNATNEIKEAPKREEEKQE
>GhGF14-32	MAKLTEQVERYEEMVKFMENVASAIPRPDELSVKEHNLLSVAYKNAIGARRASWRIVSSIEQKEEGHGNTDHDAVILQYKSKIEVSCRKYAPEF
>GhGF14-33	MVESMKKVAKLDCELTVEERNLLSVGYKNVIGARRASWRIMSSIEQKEESKGNEENVKLIKGYRRKVEEELSNICTDILSIIDKHLIPSSSSGEATVFYYKMKGDYYRYVAEFKTDQERKEAAEQSLKGYEAASAAANTDLPSTHPIRLGLALNFSVFYYEIMNSPERACHLAKQAFDEAISELDTLSEESYKDSTLIMQLLRDNLTLWTSDLPEDGGEDTVKGDDTKSVAKSEAKAEV
>PgGF14-1	MAKLAEQAERYEEMVQFMEKLVVGSTPAAELTVEERNLLSVAYKNVIGSLRAAWRIVSSIEQKEESRKNNDHVVLVKDYRSKVESELFDVCAGILKLLESNLVPSASTSESKVFYLKMKGDYHRYMVEFKVGD
>PgGF14-2	MSTEKERETHVYMAKLAEQAERYEEMVECMKKVAKLDVELTVEERNLLSVGYKNVIGARRASWRIMSSIEQKEESKGNEQNVKLIKDYRQKVEDELSKICNDILTIIDKHLIPSSISGEATVFYYKMKGDYYRYLAEFKTDQERKESADQSLKGYEAASATANTELPSTHPIRLGLALNFSVFYYEILNSPERACHLAKQAFDEAIAELDTLSEESYKDSTLIMQLLRDNLTLWTSDLPEDGGEDNFKVEEPKLAEPEVRISLNLLVLSNS
>PgGF14-3	MVLESNLVSLASTSKSKVFYLKMNGDYHRYMAEFKVGDERKEAAEDTMNSYKAAQLPISATDTELEERIIQHLAAAAAMGRARQIARREGHMNRSSGQGRPHYLVFSINSNEPSAHASSSPSQRGEGETPSITVGGPTSPLTMGEESGHPNTPPPSVQSVQASGSRVLAAN
>PgGF14-4	MVLESNLVSSTSTSESKVFYLKMKGDYHRYMVEFKVGDEQKEAAEDTMNSYKAAQVTTFDATDPEESSGVELKTVKEHPSVAEMEAKKDMFNRAALQKKLHFM
>PgGF14-5	MAAAPLAREENVYMAKLAEQAERYEEMVEFMEKVSASLSELEELTVEERNLLSVAYKNVIGARRASWRIISSIEQKEESRGNEDHVLVIKDYRSKIETELSNICDGILKLLDSRLIPSASAGDSKVFYLKMKGDYHRYLAEFKIGAERKEAAESTLTAYKAAQDIGNTELAPTHPIRLGLALNFSVFYYEILNSPDRACNLAKQAFDEAIAELDTLGEESYKDSTLIMQLLRDNLTLWTSDMQDDGTDEIKEAAAPKPDDEQQ
>PgGF14-6	MAKLAEQAERCEEMVQFMEKLVKEESRKNDDHVVLVKDYRSKVESELSDVCAGILKLLESNLVPPASTSESKVFFEGVLFEDKGDYHIWRSLRLVMSGRRRLRKL
>PgGF14-7	MLLTQKPISYNLQMMKIELKTPRTHVVISNIRVKSTLIDKVKAAQATHPNLMNVKKKVQEGVILTLNLIGPFEILDGVGTVVYRLVLPPCMSRVHNVFHVSILRKYVNDPNHVIKFELDEITEYLTYEEIRVKILDKKDRIQHSKVIPQELEYEMKSRYPHLFGIPADCGGAKPPLRGLQNVIGSLRAAWRIVSSIEQKEEYRKNDDHVVLVKDYRSKVESKLSDVCARILKLLESNLVPSASKNESKVFYLKMQGDYNRYMTEFKVGDERKEAAEETMNSYKAAQVLFIIGNDVFDIKKFYLLLMASLIPIFLGMEHMALCFMACFEIRFEAESAAGSSHVVDLFGQSLVGDLLDVFVSIPIENPTVNSTSSDVDLFADATFVSASSNAEARSNINLF…
>PgGF14-8	MASASTPREDNVYMAKLAEQAERYEEMVEFMEKVVAASESGNELTVEERNLLSVAYKNVIGARRASWRIISSIEQKEESRGNEGHVATIRDYKSKIENELSSICDGILKLLDSKLIAVAFAGDSKVFYLKMKGDYYRYLAEFKTGAERKEAAENTLNAYKAAQDIANAELTPTHPIRLLALNFSVFYYEILSSPDRACNLAKQAFDEAIAELDTLGEESYKDSTLIMQLLRDNLTLWTSDMQDDGTDEIKEAAKPDNE
>PgGF14-9	MAITIPENLTKEQYVYMVEQAERYEEMVQFMEKLLVGSTPAAELIVEERNLLSVDDKNVISSLRGAWRIVSSIEQKEESWKNDDHVVLVKDYRSKVELELFDVCVGILKLLESYLVPSASMSESKVFYLKIKGDYHRYMAEFKVGDERKEAAGETMNSYKAAHVLFSFIFLGILLVFVEKI
>PgGF14-10	MVLESNLVPSASTSESKVFYLKMKGDYHRYMADFKVGDERKEAAEDTMKSYKAAQVVGIAMNASAVSDAIRNAEINGIKNCVELKNSEGASECSRNGGQESHVQQSFTSENGTNIKFKNVVAIMDPPRVGLHPTVIKALRTHPHIRWLVLRLLFYSYFTNTLILPVVNGPTEGLALIYFSHFFTAIIGAEWWAQHFGKSLPFLNWVPIISGDVIVNVYINHEKKFAFLEMRSVEEASNAMTLDGQDLVFYNVTMLS
>PgGF14-11	MVLESNLVPSASTSESKVFYFKMKGDYHSYILCNPESLVANAIELCTPSVDKTEKVNKNNRGWRNMSSVGLARHRAKSMPNSEPFQPIKAMVVDLFPHTPHCELVMLLER
>PgGF14-12	MASTREDSVYMAKLAEQAERYEEMVEFMEKVVAAAEFGEELTVEERNLLSVAYKNVIGARRASWRIISSIEQKEESRGNEAHVVTIRDYRSKIENELSSICDGILKLLDSKLIAAASTGDSKVFYLKMKGDYYRYLAEFKTGGERKESAENTLNAYKAAQDIANADLAPTHPIRLGLALNFSVFYYEILSSPDRACNLAKQAFDEAIAELDTLGEESYKDSTLIMQLLRDNLTLWTSDMQDDGTEEIKEAAKPDNE
>PgGF14-13	MASSTQRDTFVYIAKLAEQAERYDEMVDAMKKLAKLDVELTIEERNLLSVGYKNVVGSRRASWRILSSIEQKEESRGNEVNAKRIKEYRQKVESELSSICGDIMTVIDEHLIPSCTAGESTVFYYKMWVGDICLLLVV
>PgGF14-14	MVSTESSREDNVYMAKLAEQAERYEEMVEFMEKVAKTVDIEELTVEERNLLSVAYKNVIGARRASWRIISSIEQKEESRGNEDHVTIIKEYRGKIETELSKICDGILNLLESHLVPSASSAESKVFYLKMKGDYHRYLAEFKTGAERKEAAESTLVAYKSAQDIALAELAPTHPIRLGLALNFSVFYYEILNSPDRACNLAKQAFDEAISELDTLGEESYKDSTLIMQLLRDNLTLWTSDIMDEAGDEIKEAPKQSGEGQ
>PgGF14-15	MASTKERDNFVYTAKLAEQAERYDEMVEAMKNVAKMDVELTVEERNLLSVGYKNVIGSRRASWRILSSIEQKEESRGNHQNANRIKDYRQKVESELTTICNDIMCVIDEHLIPSCGAGESTVFYYKMKGDYYRYLAEFKTGSDRKDVADLSLKAYEAATSSADAELPPTHPIRLGLALNFSVFYYEIMNSPERACHLAKQAFDEAISELDTLNEESYKDSTLIMQLLRDNLTLWTSDIPEEGEDAHKIDGTGKTGRGEDAEVDSAMNGSAEAHVSAVSLDLDGTLLNTEQLTKDVLKDLLARYGKVVDNGKEDTRLGINANWYMNTNICRLQEAALEDMRAPFQDFELNMKVGENIFLEAAKRMGVNAIHCLVIEDSLIGVKAGKAAGMKVVAVPSLQS…
>PgGF14-16	MNLSFLKRPSILSSCDNASHVDLSSLTDEVGSLRQLTLTYGSHVTLSLAKSLQNLSMLQSIKLNGCQNANQIKDYRQKVESELKTSCNDIMCVIDEHLIPSCGAGESIVFYYKMKGDYYRYLAEFKTGSDRKDVADLSLKVYEGKADVVFKTPEADSTLNLQVKIEIIKFMKLSYQFL
>PgGF14-17	MATPTPREENVYMAKLAEQAERYEEMEEFMEKVSASVTESDELSVEERNLLSVAYKNVIGARRASWRIISSIEQKEESRGNADHVAIIKEYRRKIESELSSICDGILKLLDTKLVPAASAGDSKVFYLKMKGDYHRYLAEFKTAADRKEAAENTLTAYKAAQDIANAELPSTHPIRLGLALNFSVFYYEILNSPDRACNLAKQAFDEAIAELDTLGEDSYKDSTLIMQLLRDNLTLWTSDMQDDAGDEIKEAPKEEDEQQ
>PgGF14-18	MASAIADNLTREQYVYMAKLAEQAERYEEMVQFMEKLVVGSTPAAELTVEERNLLSVAYKNVIGSLRAAWRIVSSIEQKEESRKNDDHVVLVKDYRSKVEAELSEVCAGILKLLESNLVPSASMSESKVFYLKMKGDYHRYMAEFKVGDERKEAAEDTMNSYKASQDIALADLAPTHPIRLGLALNFSVFYYEILNSSEKACSMAKQAFEEAIAELDTLGEESYKDSTLIMQLLRDNLTLWTSDAQDQLDEP
>PgGF14-19	MVLELNLVPSASTSESKVFYLKMKGDYHRYMAEFKVGDEQKEAAEETMNSYKAAQIQTDLQFVKEDLSVVERDRIDLYRARDRYSTKLQMFADYSTADGFLYMGEEVQNRSQGFDQQMLNPVYQAYLQSAYQTAQRKSAMGMQPQQLTFSFPSIQV
>PgGF14-20	MSNEKERETHVYMAKLAEQAERYEEMVECMKKVAILDVELTVEERNLLSVGYKNVIGARRASWRIMSSIEQKEESKGNEQNVKLIKGYRQKVEDELSKICSDILSIIDKHLIPSSTLGEATVFYYKMKGDYYRYLAEFKTDQERKESADQSLKGYEAASATASTELPSTHPIRLGLALNFSVFYYEIMNSSERACHLAKQAFDEAIAELDTLSEESYKDSTLIMQLLRDNLTLWTSDLPEDGGEDNFKGEESKPAAEPEQ
>PgGF14-21	MASTKERDNFVYTAKLAEQAERYDEMVEAMKNVAKMDVELTVEERNLLSVGYKNVIGSRRASWRILSSIEQKEESRGNHQNANRIKDYRQKVESELTTICNDIMCVIDEHLIPSCGAGESTVFYYKMKGDYYRYLAEFKTGSDRKDVADLSLKAYEAATSSADAELPPTHPIRLGLALNFSVFYYEIMNSPERACHLAKQAFDDAISELDTLNEESYKDSTLIMQLLRDNLTLWTSDIPEEGEDAHKIDGAGKTGRGEDAEVVRQINDLDLLCDVCLGERIWVRPWGCLCLVITDNLTFLYRTLLDSAMNDSAEAHVSAVILDLDGTLLNTEQLTKDVLKDLLARYGKVVDNGKEDTRLGMTHKESRVAIIKDYDLPITPEQFTQQIFPMYQEKWHQAR…
>PgGF14-22	MVLESNLVPSASTSESKVFYLKMKGDYHRYMAEFKIGDEQKEAAEDTMKSYKAAQDLSAQETQVPNEDVTISAWMLAMNVNHEDNRQLCQLECTASSIAVWDIPKCSGHCNPEKKLLELHQKESCTKYSNSRF
>PgGF14-23	MSNEKERETHVYMAKLAEQAERYEEMVECMKKVAILDVELTVEERNLLSVGYKNVIGARRASWRIMSSIEQKEESKGNEQNVKLIKGYRQKVEDELSKICSDILSIIDKHLIPSSTLGEATVFYYKMKGDYYRYLAEFKTDQERKESADQSLKGYEAASATASTELPSTHPIRLGLALNFSVFYYEIMNSSERACHLAKQAFDEAIAELDTLSEESYKDSTLIMQLLRDNLTLWTSDLPEDGGEDNFKGEESKPAAEPEQ
>PgGF14-24	MATSTPREENVYLAKLAEQAERYEEMVEFMEKVSAAVTESDELSVEERNLLSVAYKNVIGARRASWRIISSIEQKEESRGNADHVATIKEYRGKIESELSSICDGILKLLDTKLIPAASVGDSKVFYLKMKGDYHRYLAEFKTAADRKDAAENTLNAYKAAQDIANAELAPTHPIRLGLSLNFSVFYYEILNSPDRACNLAKQAFDEAIAELDTLGEDSYKDSTLIMQLLRDNLTLWTSDMQDNAGDEIKEAPKHEDKQQ
>PgGF14-25	MAITIPENLTREHYVYMAKLAEQAQRYEEMVQIVSSIEQKEESRKNDDHMVLVKDYKSKVKLELFDVCAGFLKLLESNLVPSASTSESKVFYLKMKGITIESAAGSSHEVDLFGQSLVGDLLDVSVSVPTENPTVNSTSSDVDLFVDATFVSASSNAEVGVNIYLPPNPPLLT
>PgGF14-26	MASASTPREDNVYMAKLAEQAERYEEMVEFMEKVVAASESGNELTVEERNLLSVAYKNVIGARRASWRIISSIEQKEESRGNEGHVATIRDYRSKIENELSSICDGILKLLDSKLIAAAFAGDSKVFYLKMKGDYYRYLAEFKTGAERKEAAENTLNAYKAAQDIANAELTPTHPIRLGLALNFSVFYYEILSSPDRACNLAKQAFDEAIAELDTLGEESYKDSTLIMQLLRDNLTLWTSDMQDDGTDEIKEAAKPDNE
>PgGF14-27	MQHGKVIAYASRQLKDYEKRYTTHDLKLAAMVLESNLVPLASTSESKVFYLTVKWDYHRYMAEFKVRDERKEAAEDTMKSYKAAQETEFNFLASDL
>PgGF14-28	MASSTQRETFVYIAKLAEQAERYDEMVDAMKKLAKLDVELTIEERNLLSVGYKNVVGSRRASWRILLSIEQKEESKGNEVNVKRIKEYRQKVESELSSICSDIMTVIDEHLIPSCSAGESTVFYYKMKGDYYRYLAEFKTGDDRKESAEQSLKAYQLASTSAETDLSPTHPIRLGLALNFSVFYYEIMNSPERACHLAKQAFDEAISELDSLSEESYKDSTLIMQLLRDNLTLWTSDMPDDGEDHRMEISGKSGGGEDAE
>PgGF14-29	MATSTPREENVYLAKLAEQAERYEEMVEFMEKVSAAVTESDELSVEERNLLSVAYKNVIGARRASWRIISSIEQKEESRGNADHVATIKEYRGKIESELSSICDGILKLLDTKLIPAASVGDSKVFYLKMKGDYHRYLAEFKTAADRKDAAENTLNAYKAAQDIANAELAPTHPIRLGLSLNFSVFYYEILNSPDRACNLAKQAFDEAIAELDTLGEDSYKDSTLIMQLLRDNLTLWTSDMQDNAGDEIKEAPKHEDEQQ
>PgGF14-30	MVLESNLVSSASMSESKVFYLKMKGDYHRYMAEFKVGDERKEAVEDTMNSYKAAQVRRLRIQQRIKNKELGILNEEPEIELPNFPPFFPFLPPLDVMGSLLKEYVNLPLKQDEIPNSSDTNDEEVTTSDATDPEESSGVELKNSAGASECSRNGGQESHVQQSCTLEKVTFHVILKA
>PgGF14-31	MKKDLCPGSDPECHTLLKAIHERIAHSSLCSIEMDVNARDLLGIAMDFMADMVLESNLVPSASTSESKVFHLKMKGDYHRYMAEFKVGYERKEAAEDTMKSYKAAQET
>PgGF14-32	MASAIADNLTREQYVYMAKLAEQAERYEEMVQFMEKLVVGSTPAAELTVEERNLLSVAYKNVIGSLRAAWRIVSSIEQKEESRKNDDHVVLVKDYRSKVEAELSEVCAGILKLLESNLVPSASTSESKVFYLKMKGDYHRYMAEFKVGDERKEAAEDTMNSYKAAQDIALADLASTHPIRLGLALNFSVFYYEILNSSEKACSMAKQAFEEAIAELDTLGEESYKDSTLIMQLLRDNLTLWTSDAQDQLDEP
>PgGF14-33	MASSTQRDTFVYIAKLAEQAERYDEMVDAMKKLAKLDVELTIEERNLLSVGYKNVVGSRRASWRILSSIEQKEESRGNEVNAKRIKEYRQKVESELSSICCDIMTVIDEHLIPSCTAGESTVFYYKMKGDYYRYLAEFKTGNERKESADQSLKGYQLASTSAETDLSPTHPIRLGLALNFSVFYYEIMNSPARACQLAKQAFDEAISELDSLSEESYKDSTLIMQLLRDNLTLWTSDMPENGEDQRMEISPKSGGGEDAE
>PgGF14-34	MASSTQRETFVYIAKLAEQAERYDEMVDAMKKLAKLDVELTIEERNLLSVGYKNVVGSRRASWRILLSIEQKEESKGNEVNVKRIKEYRQKVESELSSICSDIMTVIDEHLIPSCSAGESTVFYYKMKGDYYRYLAEFKTGDDRKESAEQSLKAYQLASTSAETDLSPTHPIRLGLALNFSVFYYEIMNSPERACHLAKQAFDEAISELDSLSEESYKDSTLIMQLLRDNLTLWTSDMPDDGAEDHRMEISGKSGGGEDAE
>PgGF14-35	MPLPVPENLTRGQYVYLAKLAEQAERYEEMVSFMEKLVIGSTSAAAGELTVEERNLLSVAYKNVIGSLRAAWRIVSSIEQKEEGRKNEEHVALVKEYRSKVESELTGVCAGVLKLIDSHLVPSASTSESKVFYLKMKGDYHRYLAEFKIGNERKEAAEETMLAYKAAQDIAAADLPPTHPIRLGLALNFSVFYYEILSASEKASSMAKQAFEEAIAELDSLGEESYKDSTLIMQLLRDNLTLWTSDMQKGRNGKILNGTENTLQNGNFVCRTGRDGKNYLS
>PgGF14-36	MASSLSSPREENVYMAKLAEQAERYEEMVEFMEKVSGSLSETEELTVEERNLLSVAYKNVIGARRASWRIISSIEQKEESRGNGDNVSVIRDYRSKIETELSKICDGILNLLDSRLIPSASAGDSKVFYLKMKGDYHRYLAEFKTGAERKEAAESTLTAYKAAQDIANTELAPTHPIRLGLALNFSVFYYEILNSPDRACNLAKQAFDEAIAELDTLGEESYKDSTLIMQLLRDNLTLWTSDMQDDGADEIKEAAPKHDGADEIKEPAPKNDDEQQ
>PgGF14-37	MKERKKRSELNKWLRAIKIRLRCNAAGEADDNKAAAAGQRSSDNYSIHEGHKTAYNRRCQIVVAGEEVGYILSAEMTGSGEKVSGGDGWHGKPGLDESNVFYLKMKGDYHKYMAEFKVGDERKEAAEDTMKSYMAVMLWGNDKANPSATVLSAAMLLKYGLGEEKAAQRIE
>PgGF14-38	MLPPESSREDNVYMAKLAEQAERYEEMVEFMEKVAKTVDVEELTVEERNLLSVAYKNVIGARRASWRIISSIEQKEESRGNEDHVTIIKEYRGKIEAELSKICDGILNLLESHLVPSASSAESKVFYLKMKGDYHRYLAEFKTGSERKEAAESTLLAYKSAQDIALAELASTHPIRLGLALNFSVFYYEILNSPDRACNLAKQAFDEAISELDTLGEESYKDSTLIMQLLRDNLTLWTSDITDEAGDEIKEAAPKPSGEIIE
>PgGF14-39	MLPPESSREDNVYMAKLAEQAERYEEMVEFMEKVAKTVDVEELTVEERNLLSVAYKNVIGARRASWRIISSIEQKEESRGNEDHVTIIKEYRGKIEAELSKICDGILNLLESHLVPSASSAESKVFYLKMKGDYHRYLAEFKTGSERKEAAESTLLAYKSAQDIALADLASTHPIRLGLALNFSVFYYEILNSPDRACNLAKQAFDEAISELDTLGEESYKDSTLIMQLLRDNLTLWTSDITDEAGDEIKEAAPKPSGEIIE
>PgGF14-40	MPLPVPENLTRGQYVYLAKLAEQAERYEEMVSFMENSTSATVGELTVEERNLLSVAYKNVIGSLRAAWRIISSIEQKEEGRKNEEHVALVKEYRSKVESELTGVCAGVLKLIDSHLVPSASTSESKVFYLKMKGDYHRYLAEFKIGNERKEAAEETMFAYKAAQDIAAADLPPTHPIRLGLALNFSVFYYEILSASEKACSMAKQAFEEAIAELDSLGEESYKDSTLIMQLLRDNLTLWTSDMQEQMDEA
>PgGF14-41	MASTREDSVYMAKLAEQAERYEEMVEFMEKVVAAAEFGEELTVEERNLLSVAYKNVIGARRASWRIISSIEQKEESRGNEAHVVTIRDYRSKIENELSSICDGILKLLDSKLIAAASTGDSKVFYLKMKGDYYRYLAEFKTGGERKEAAENTLNAYKAAQDIANADLAPTHPIRLGLALNFSVFYYEILSSPDRACNLAKQAFDEAIAELDTLGEESYKDSTLIMQLLRDNLTLWTSDMQDDGTEEIKEAAKPDNE
>PgGF14-42	MSTEKERETHVYMAKLAEQAERYEEMVECMKKVAKLDVELTVEERNLLSVGYKNVIGARRASWRIMSSIEQKEESKGNEQNVKLIKGYRQKVEDELSKICNDILTIIDKHLIPSSISGEATVFYYKMKGDYYRYLAEFKTDQERKESADQSLKGYEAASATANTELPSTHPIRLGLALNFSVFYYEILNSPERACHLAKQAFDEAIAELDTLSEESYKDSTLIMQLLRDNLTLWTSDLPEDGGEDNFKVEEPKSAEPEH
>OsGF14a	MAAAAGGGTREEMVYMAKLAEQAERYEEMVEFMEKVVTAAAAGGGGELTVEERNLLSVAYKNVIGARRASWRIVSSIEQKEEGRGAAGHAAAARSYRARVEAELSNICAGILRLLDERLVPAAAAVDAKVFYLKMKGDYHRYLAEFKTGAERKDAADATLAAYQAAQDIAMKELSPTHPIRLGLALNFSVFYYEILNSPDRACTLAKQAFDEAISELDTLGEESYKDSTLIMQLLRDNLTLWTSDMQDDGGDEMRDATKPEDEH
>OsGF14b	MSAQAELSREENVYMAKLAEQAERYEEMVEFMEKVAKTVDSEELTVEERNLLSVAYKNVIGARRASWRIISSIEQKEESRGNEDRVTLIKDYRGKIETELTKICDGILKLLESHLVPSSTAPESKVFYLKMKGDYYRYLAEFKTGAERKDAAENTMVAYKAAQDIALAELPPTHPIRLGLALNFSVFYYEILNSPDRACNLAKQAFDEAISELDTLSEESYKDSTLIMQLLRDNLTLWTSDISEDTAEEIREAPKRDSSEGQ
>OsGF14c	MSREENVYMAKLAEQAERYEEMVEYMEKVAKTVDVEELTVEERNLLSVAYKNVIGARRASWRIVSSIEQKEEGRGNEEHVTLIKEYRGKIEAELSKICDGILKLLDSHLVPSSTAAESKVFYLKMKGDYHRYLAEFKTGAERKEAAESTMVAYKAAQDIALADLAPTHPIRLGLALNFSVFYYEILNSPDKACNLAKQAFDEAISELDTLGEESYKDSTLIMQLLRDNLTLWTSDLTEDGGDEVKEASKGDACEGQ
>OsGF14d	MSPAEPTREESVYKAKLAEQAERYEEMVEYMERVARAAGGASGGEELTVEERNLLSVAYKNVIGARRASWRIISSIEQKEEGRGNDAHAATIRSYRGKIEAELARICDGILALLDSHLVPSAGAAESKVFYLKMKGDYHRYLAEFKSGDERKQAAESTMNAYKAAQDIALADLAPTHPIRLGLALNFSVFYYEILNSPDRACNLAKQAFDEAISELDSLGEESYKDSTLIMQLLRDNLTLWTSDANDDGGDEIKEAAAPKEPGDQ
>OsGF14e	MSQPAELSREENVYMAKLAEQAERYEEMVEFMEKVAKTVDSEELTVEERNLLSVAYKNVIGARRASWRIISSIEQKEESRGNEDRCTLIKEYRGKIETELSKICDGILKLLDSHLVPSSTAPESKVFYLKMKGDYYRYLAEFKTGAERKDAAENTMVAYKAAQDIALAELPPTHPIRLGLALNFSVFYYEILNSPDRACNLAKQAFDEAISELDTLSEESYKDSTLIMQLLRDNLTLWTSDISEDAAEEIKEAPKGESGDGQ
>OsGF14f	MSLQGIQLSDLSYKHAILKESQYTIKRDVGTTTAVTPSSLQREVSLLCGEILYTKHTDYSHAAEVGMQYVSTTLGAERTQQILKNSGSEVQAVLTKTYSLGKGKNSKGEELQMLDIHGVEKSWVEEVDKEARKTMASATKDNSGPIPQDQRPSSPDAPIILLCIGALIFTKLASTIEVGLETAVRRANRVLNDALKRFPRIDIPKIARSFYDLFEQKVYYRSLFIEYGKALGSSSTGSKAESLFVNIFMQAYGAGQTMLRWGVIARSSNNIMLGHVSVQAELKQVTEVYDLVREMGPESGLLHLRQSPKAGLLSLANCPNFASVVLGNASGLGILGMYRGRVPNTELFAAAESYARSLKESNKINFSSLGLTEEEKEAAENFLNINEEGQNDYE
>OsGF14g	MAPSDDLVYMAKLAEQAERYDEMVEAMNSVAKLDEGLTKEERNLLSVGYKNLIGAKRAAMRIIGSIELKEETKGKESHVRQTAEYRRKVEAEMDKICCDVINIIDKYLIPHSSGAESSVFYYKMKGDYYRYLAEFKTGTEKIEVSELSLNAYETASKTAQTDLTPTDPIRLGLALNISVFYCEIMNSPDKACQLAKNAFDEAVAELPSLSEENYKDSTLIMQLLRDNLALWNSDMADDADDIRERTDTTGAKGDPAA
>OsGF14h	MKEREKVVRLAKLAEQAERYDDMVEFMKTLARMDVDMSAEERLLFSVGFKKTIGARRASWRILESLEQKVTAGDQPGVTINGYKKKVEDELRAVCNEVLSIIAIHCLPLANSGENVVFFYKMKGDYYRYLAEFSTGTEKKAATDQSLMAYQAWPCAQLFSLLEIMNSPERASQVAKQALDEATAEINSAGVEGYKDSMLMMQLLKENLALWTSELTGGETSKDDDVVMEG
>AtGRF1	MATPGASSARDEFVYMAKLAEQAERYEEMVEFMEKVAKAVDKDELTVEERNLLSVAYKNVIGARRASWRIISSIEQKEESRGNDDHVSLIRDYRSKIETELSDICDGILKLLDTILVPAAASGDSKVFYLKMKGDYHRYLAEFKSGQERKDAAEHTLTAYKAAQDIANSELAPTHPIRLGLALNFSVFYYEILNSPDRACNLAKQAFDEAIAELDTLGEESYKDSTLIMQLLRDNLTLWTSDMQIWISSLFDAFFWSNSDFGDCQLFYILIHSSILLSCGLILIMMILSNVFFNQDDVADDIKEAAPAAAKPADEQQS
>AtGRF2	MASGREEFVYMAKLAEQAERYEEMVEFMEKVSAAVDGDELTVEERNLLSVAYKNVIGARRASWRIISSIEQKEESRGNDDHVTAIREYRSKIETELSGICDGILKLLDSRLIPAAASGDSKVFYLKMKGDYHRYLAEFKTGQERKDAAEHTLAAYKSAQDIANAELAPTHPIRLGLALNFSVFYYEILNSPDRACNLAKQAFDEAIAELDTLGEESYKDSTLIMQLLRDNLTLWTSDMQDDAADEIKEAAAPKPTEEQQ
>AtGRF3	MSTREENVYMAKLAEQAERYEEMVEFMEKVAKTVDVEELSVEERNLLSVAYKNVIGARRASWRIISSIEQKEESKGNEDHVAIIKDYRGKIESELSKICDGILNVLEAHLIPSASPAESKVFYLKMKGDYHRYLAEFKAGAERKEAAESTLVAYKSASDIATAELAPTHPIRLGLALNFSVFYYEILNSPDRACSLAKQAFDDAIAELDTLGEESYKDSTLIMQLLRDNLTLWTSDMTDEAGDEIKEASKPDGAE
>AtGRF4	MAAPPASSSAREEFVYLAKLAEQAERYEEMVEFMEKVAEAVDKDELTVEERNLLSVAYKNVIGARRASWRIISSIEQKEESRGNDDHVTTIRDYRSKIESELSKICDGILKLLDTRLVPASANGDSKVFYLKMKGDYHRYLAEFKTGQERKDAAEHTLTAYKAAQDIANAELAPTHPIRLGLALNFSVFYYEILNSPDRACNLAKQAFDEAIAELDTLGEESYKDSTLIMQLLRDNLTLWTSDMQFCIMYDNTLMSFLVLISDSVVLISTINQDESPEEIKEAAAPKPAEEQKEIXXXXX
>AtGRF5	MSSDSSREENVYLAKLAEQAERYEEMVEFMEKVAKTVETEELTVEERNLLSVAYKNVIGARRASWRIISSIEQKEDSRGNSDHVSIIKDYRGKIETELSKICDGILNLLEAHLIPAASLAESKVFYLKMKGDYHRYLAEFKTGAERKEAAESTLVAYKSAQDIALADLAPTHPIRLGLALNFSVFYYEILNSSDRACSLAKQAFDEAISELDTLGEESYKDSTLIMQLLRDNLTLWTSDLNDEAGDDIKEAPKEVQKVDEQAQPPPSQ
>AtGRF6	MAATLGRDQYVYMAKLAEQAERYEEMVQFMEQLVTGATPAEELTVEERNLLSVAYKNVIGSLRAAWRIVSSIEQKEESRKNDEHVSLVKDYRSKVESELSSVCSGILKLLDSHLIPSAGASESKVFYLKMKGDYHRYMAEFKSGDERKTAAEDTMLAYKAAQDIAAADMAPTHPIRLGLALNFSVFYYEILNSSDKACNMAKQAFEEAIAELDTLGEESYKDSTLIMQLLRDNLTLWTSDMQTNQMHHIRDIKEHVKTEITAKPCVLSYYYSM
>AtGRF7	MSSSREENVYLAKLAEQAERYEEMVEFMEKVAKTVDTDELTVEERNLLSVAYKNVIGARRASWRIISSIEQKEESRGNDDHVSIIKDYRGKIETELSKICDGILNLLDSHLVPTASLAESKVFYLKMKGDYHRYLAEFKTGAERKEAAESTLVAYKSAQDIALADLAPTHPIRLGLALNFSVFYYEILNSPDRACSLAKQAFDEAISELDTLGEESYKDSTLIMQLLRDNLTLWNSDINDEAGGDEIKEASKHEPEEGKPAETGQ
>AtGRF8	MATTLSRDQYVYMAKLAEQAERYEEMVQFMEQLVSGATPAGELTVEERNLLSVAYKNVIGSLRAAWRIVSSIEQKEESRKNEEHVSLVKDYRSKVETELSSICSGILRLLDSHLIPSATASESKVFYLKMKGDYHRYLAEFKSGDERKTAAEDTMIAYKAAQDVAVADLAPTHPIRLGLALNFSVFYYEILNSSEKACSMAKQAFEEAIAELDTLGEESYKDSTLIMQLLRDNLTLWTSDMQVCPILYFHIQLHHQKLAY
>AtGRF9	MGSGKERDTFVYLAKLSEQAERYEEMVESMKSVAKLNVDLTVEERNLLSVGYKNVIGSRRASWRIFSSIEQKEAVKGNDVNVKRIKEYMEKVELELSNICIDIMSVLDEHLIPSASEGESTVFFNKMKGDYYRYLAEFKSGNERKEAADQSLKAYEIATTAAEAKLPPTHPIRLGLALNFSVFYYEIMNAPERACHLAKQAFDEAISELDTLNEESYKDSTLIMQLLRDNLTLWTSDISEEGGDDAHKTNGSAKPGAGGDDAEVSIRDSFTRGKSN
>AtGRF10	MENEREKQVYLAKLSEQTERYDEMVEAMKKVAQLDVELTVEERNLVSVGYKNVIGARRASWRILSSIEQKEESKGNDENVKRLKNYRKRVEDELAKVCNDILSVIDKHLIPSSNAVESTVFFYKMKGDYYRYLAEFSSGAERKEAADQSLEAYKAAVAAAENGLAPTHPVRLGLALNFSVFYYEILNSPESACQLAKQAFDDAIAELDSLNEESYKDSTLIMQLLRDNLTLWTSDLNEEGDERTKGADEPQDEN
>AtGRF11	MENERAKQVYLAKLNEQAERYDEMVEAMKKVAALDVELTIEERNLLSVGYKNVIGARRASWRILSSIEQKEESKGNEQNAKRIKDYRTKVEEELSKICYDILAVIDKHLVPFATSGESTVFYYKMKGDYFRYLAEFKSGADREEAADLSLKAYEAATSSASTELSTTHPIRLGLALNFSVFYYEILNSPERACHLAKRAFDEAIAELDSLNEDSYKDSTLIMQLLRDNLTLWTSDLEEGGEQSKGHNQQDEVNKI
>AtGRF12	MSSSGSDKERETFVYMAKLSEQAERYDEMVETMKKVARVNSELTVEERNLLSVGYKNVIGARRASWRIMSSIEQKEESKGNESNVKQIKGYRQKVEDELANICQDILTIIDQHLIPHATSGEATVFYYKMKGDYYRYLAEFKTEQERKEAAEQSLKGYEAATQAASTELPSTHPIRLGLALNFSVFYYEIMNSPERACHLAKQAFDEAIAELDTLSEESYKDSTLIMQLLRDNLTLWTSDLPEDGGEDNIKTEESKQEQAKPADATEN
>AtGRF13	MENEREKLIYLAKLGCQAGRYDDVMKSMRKVCELDIELSEEERDLLTTGYKNVMEAKRVSLRVISSIEKMEDSKGNDQNVKLIKGQQEMVKYEFFNVCNDILSLIDSHLIPSTTTNVESIVLFNRVKGDYFRYMAEFGSDAERKENADNSLDAYKVAMEMAENSLAPTNMVRLGLALNFSIFNYEIHKSIESACKLVKKAYDEAITELDGLDKNICEESMYIIEMLKYNLSTWTSGDGNGNKTDG
>DCAR_010049	MHPIRLGLARNFHVFYYEIMNSPERACQLAKQAFDEAIVELDTLSEESYKDSTLIMQLLRDNLILWTSDLPEDGGGALGGIC
>DCAR_021876	MATREENVYMAKLAEQAERYEEMVEFMEKVSDTVTDSDELSVEERNLLSVAYKNVIGARRASWRIISSIEQKEESRGNADHVATIKEYRAKIEAELSKICDGILKLLDAKLIPAASAGDSKVFYLKMKGDYHRYMAEFKVADERKEAAENTLSAYKAAQDIANSELASTHPIRLGLALNFSVFYYEILNSPDRACNLAKQAFDEAIAELDTLGEDSYKDSTLIMQLLRDNLTLWTSDMQDDAGEEIKESAKNEDEPQAQAQ
>DCAR_014206	MASREDNVYMAKLAEQAERYEEMVEFMEKVVAASDSGEELTVEERNLLSVAYKNVIGARRASWRIISSIEQKEESRGNDAHVATIREYRSKIESELSSICDGILKLLDSKLIGAASNGDSKVFYLKMKGDYYRYLAEFKIASERKEAAENTLNAYKAAQDIANAELAPTHPIRLGLALNFSVFYYEILSSPDRACNLAKQAFDEAIAELDTLGEESYKDSTLIMQLLRDNLTLWTSDMQDDGTEEIKDAPKPENE
>DCAR_025919	MVASDASREDNVYNAKLAEQAERYEEMVEFMEKVAKTVDVEELTVEERNLLSVAYKNVIGARRASWRIISSIEQKEESRGNDDHVNIIKEYRGKIEAELSKICDGILNLLDSHLVPSASSAESKVFYMKMKGDYHRYLAEFKVGAERKEAAESTLLAYKSAQDIALAELASTHPIRLGLALNFSVFYYEILNSPDRACNLAKQAFDEAISELDTLGEESYKDSTLIMQLLRDNLTLWTSDIADEAGDEIKEDPKPSDD
>DCAR_021289	MASRDTFVYSAKLAEQAERYDEMVEAMKNVAKLDVELTVEERNLLSVGYKNVIGSRRASWRILSSIEQKEESRGNHQNVNRIKDYRQKVETELTAICNDIMSVIDEHLIPSCTPGESTVFYYKMKGDYYRYLAEFKSGDDRKDVADLSLKAYEAATASADAELASTHPIRLGLALNFSVFYYEIMNSPERACRLAKQAFDEAISELDNLSEESYKDSTLIMQLLRDNLTLWTSDIPEDGEDGHKDGAGKAVKGEDAEVGSV
>DCAR_021021	MVDAMKNLAKLDVELTIEERNLLSVGYKNVVGSRRASWRILSSIEQKEESKGNDVNVKRINTYRQKVEQELSSICGDIMTVIDEHLIPSCSAGESTVFYYKMKGDYYRYLAEFKVGNDRKEAADQSLKAYQLASTSAETDLSSTHPIRLGLALNFSVFYYEIMNSPERACHLAKQAFDEAISELDTLSEESYKDSTLIMQLLRDNLTLWTSDMPDDGEDQKMEIIGNTGEAEDSKKTRRWRSLVILVKLKTQSNWTLKLAFLNK
>DCAR_020394	MKHAASETANKELHSMHPIRLGLARNFHVFYYEIMNSPERACQLAKQAFDEAIVELDTLSEESYKDSTLIMQLLRDNLILWTSDLPEDGGGALGGIC
>DCAR_018270	MSPLGTDEGWKPGLKVLARSVAHLNIERPVRVMSSTDWSAKELCLEQIEFACAHVYACFRVAFELLKHGNEMPRMMKSPPPVDDDDE
>DCAR_019288	MSSPREENVYNAKLAEQAERYEEMVEYMEKVSNSLAESEELSVEERNLLSVAYKNVIGARRASWRIISSIEQKEESRGNEDHVSVIKEYRSKIEKELSNICDGILKLLDATLVPSASSGDSKVFYLKMKGDYHRYLAEFRTGGDRKDAAESTLNAYKAAQDIATAELAPTHPIRLGLALNFSVFYYEILNSPDRACSLAKQAFDEAIAELDTLGEESYKDSTLIMQLLRDNLTLWTSDMQDDGPDEIKEASSKQEEKKEDEQQQ
>DCAR_019305	MATLSREQYVYMAKLAEQAERYEEMVEFMEKLVTGATPAGELTVEERNLLSVAYKNVIGSLRAAWRIVSSIEQKEESRKNEDHVVLVKDYRSKVESELSDVCGGILKLLETNLVPSASTSESKVFYLKMKGDYHRYMAEFKVGDERKEAAEDTMNSYKAAQDIALADLAPTHPIRLGLALNFSVFYYEILNSSDKACSMAKQAFEEAIAELDTLGEESYKDSTLIMQLLRDNLTLWTSDSQDQLDEP
>DCAR_014192	MPIPENLNRDQYLYLAKLAEQSERYEEMVSFMEHLVLTSTATAELTIEERNLLSVAYKNVIGSLRAAWRIVSSIEQKEEGRKNDEHVELVKTYRDQVETELTAVCAGVLKLMDSHLIPSAKESESKVFYLKMKGDYYRYLAEFKVGDERKQAAEETMIAYKAAQDIAAAGLPSTHPIRLGLALNFSVFYYEILNASEKACSMAKQAFEEAIAELDTLGEESYKDSTLIMQLLRDNLTLWTSDMQVGNY
>DCAR_012862	MADITMAENLSREQLVFLSKLAEQAERYEEMVQFMERFVLGLAPGAEPTFEERNLISVAYKNVIGQLRAAWRIVSSIEQKEEARKNDDHVAMAREYRSKIEKELSELCAGILKILEENLVPAASSSDSKVFYLKMKGDYFRYLSEFKIGDERKRVAEDTMNSYKAAQEIAMADLASTHPIRLGLALNFSVFYYEILNSSERACSMAKQAFEEAIAELDSLAEEQYKDSTLIMQLLRDNLTLWTSDNIQDQPDE
>DCAR_007188	MSSDKDRDTHVYMAKLAEQAERYEEMVDCMKQVAKLNVELTVEERNLLSVGYKNVIGARRASWRIMSSIEQKEESKGNEQNVKLIKGYRQKVEDELSNICNDILSIIDKNLVPSSTSGEATVFYYKIKELPSTHPIRLGLALNFSVFYYEIMNSPERACHLAKQAFDEAIAELDTLSEESYKDSTLIMQLLRDNLTLWTSDLPEDGGDDNNAKGEESKSESKPAATAENADLSAHK
>DCAR_003472	MASREDSVYMAKLAEQAERYEEMVEFMEKVVAAATSGEELTVEERNLLSVAYKNVIGARRASWRIISSIEQKEESRGNDGHVATIRDYRSKIESELSGICDGILKLLDTKLIGAASSGDSKVFYLKMKGDYYRYLAEFKTGAERKDAAENTLNAYKAAQDIANAELAPTHPIRLGLALNFSVFYYEILSSPDRACNLAKQAFDEAIAELDTLGEESYKDSTLIMQLLRDNLTLWTSDMQDDGTEEIKEAAKPDDE
