# Supplementary material for: Molecular analysis of the 14-3-3 genes in Panax ginseng and their responses to heat stress
Source: PeerJ. 2023 May 9;11:e15331. doi: 10.7717/peerj.15331 (PMC10178371; doi:10.7717/peerj.15331)
Supplement: Supplemental Information 6 — Homology of P. ginseng and D.carota 14-3-3 genes, functional annotation of target proteins and proteins with potential interactions with PgGF14s are listed in this table. [file peerj-11-15331-s006.xlsx]

## Sheet: Gene mapping
Gene correspondence and information on interacting proteins
#queryIndex	queryItem	stringId	identity	bitscore	preferredName	annotation
1	PgGF14-1	79200.A0A164ZKY0	93.2	240.4	A0A164ZKY0	14_3_3 domain-containing protein; Belongs to the 14-3-3 family.
2	PgGF14-29	79200.A0A164W6I0	81.8	383.6	A0A164W6I0	14_3_3 domain-containing protein; Belongs to the 14-3-3 family.
3	PgGF14-6	79200.A0A166CA21	64.6	144.8	A0A166CA21	RING-type domain-containing protein
4	PgGF14-13	79200.A0A164ZKY0	88.9	96.7	A0A164ZKY0	14_3_3 domain-containing protein; Belongs to the 14-3-3 family.
5	PgGF14-11	79200.A0A164ZKD0	90.2	429.9	A0A164ZKD0	14_3_3 domain-containing protein; Belongs to the 14-3-3 family.
6	PgGF14-2	79200.A0A164ZKY0	57.5	115.2	A0A164ZKY0	14_3_3 domain-containing protein; Belongs to the 14-3-3 family.
7	PgGF14-38	79200.A0A164ZKY0	87.9	185.7	A0A164ZKY0	14_3_3 domain-containing protein; Belongs to the 14-3-3 family.
8	PgGF14-10	79200.A0A166I732	93.3	455.3	A0A166I732	14_3_3 domain-containing protein; Belongs to the 14-3-3 family.
9	PgGF14-3	79200.A0A164ZKY0	82.8	242.7	A0A164ZKY0	14_3_3 domain-containing protein; Belongs to the 14-3-3 family.
10	PgGF14-27	79200.A0A164Z9P0	45.2	110.5	A0A164Z9P0	Uncharacterized protein; Belongs to the class I-like SAM-binding methyltransferase superfamily. RNA M5U methyltransferase family.
11	PgGF14-5	79200.A0A164Z9P0	93.8	160.6	A0A164Z9P0	Uncharacterized protein; Belongs to the class I-like SAM-binding methyltransferase superfamily. RNA M5U methyltransferase family.
12	PgGF14-7	79200.A0A166I732	93.3	458	A0A166I732	14_3_3 domain-containing protein; Belongs to the 14-3-3 family.
13	PgGF14-32	79200.A0A164W6I0	86	207.6	A0A164W6I0	14_3_3 domain-containing protein; Belongs to the 14-3-3 family.
14	PgGF14-25	79200.A0A164UG53	92.6	459.5	A0A164UG53	14_3_3 domain-containing protein; Belongs to the 14-3-3 family.
15	PgGF14-41	79200.A0A164W6I0	90.3	453	A0A164W6I0	14_3_3 domain-containing protein; Belongs to the 14-3-3 family.
16	PgGF14-24	79200.A0A164W6I0	83.1	135.2	A0A164W6I0	14_3_3 domain-containing protein; Belongs to the 14-3-3 family.
17	PgGF14-19	79200.A0A161YDG1	91.3	442.6	A0A161YDG1	14_3_3 domain-containing protein; Belongs to the 14-3-3 family.
18	PgGF14-28	79200.A0A164ZKY0	94.3	445.7	A0A164ZKY0	14_3_3 domain-containing protein; Belongs to the 14-3-3 family.
19	PgGF14-16	79200.A0A164ZKY0	92.6	101.3	A0A164ZKY0	14_3_3 domain-containing protein; Belongs to the 14-3-3 family.
20	PgGF14-18	79200.A0A164W6I0	80.2	375.6	A0A164W6I0	14_3_3 domain-containing protein; Belongs to the 14-3-3 family.
21	PgGF14-42	79200.A0A164W6K9	74	550.1	A0A164W6K9	Uncharacterized protein
22	PgGF14-17	79200.A0A164ZKY0	87.7	104	A0A164ZKY0	14_3_3 domain-containing protein; Belongs to the 14-3-3 family.
23	PgGF14-22	79200.A0A164W6I0	80.2	375.6	A0A164W6I0	14_3_3 domain-containing protein; Belongs to the 14-3-3 family.
24	PgGF14-21	79200.A0A161YDG1	90.2	444.5	A0A161YDG1	14_3_3 domain-containing protein; Belongs to the 14-3-3 family.
25	PgGF14-23	79200.A0A164ZKY0	59.4	126.3	A0A164ZKY0	14_3_3 domain-containing protein; Belongs to the 14-3-3 family.
26	PgGF14-9	79200.A0A166I732	94	458	A0A166I732	14_3_3 domain-containing protein; Belongs to the 14-3-3 family.
27	PgGF14-12	79200.A0A164ZKY0	77.4	90.9	A0A164ZKY0	14_3_3 domain-containing protein; Belongs to the 14-3-3 family.
28	PgGF14-33	79200.A0A164WCX7	90.6	413.7	A0A164WCX7	14_3_3 domain-containing protein; Belongs to the 14-3-3 family.
29	PgGF14-20	79200.A0A161YDG1	90.6	445.3	A0A161YDG1	14_3_3 domain-containing protein; Belongs to the 14-3-3 family.
30	PgGF14-14	79200.A0A164ZKY0	90.7	98.2	A0A164ZKY0	14_3_3 domain-containing protein; Belongs to the 14-3-3 family.
31	PgGF14-4	79200.A0A164ZKY0	89.1	97.1	A0A164ZKY0	14_3_3 domain-containing protein; Belongs to the 14-3-3 family.
32	PgGF14-40	79200.A0A164ZKY0	94.7	445.7	A0A164ZKY0	14_3_3 domain-containing protein; Belongs to the 14-3-3 family.
33	PgGF14-35	79200.A0A164W6I0	81.1	402.9	A0A164W6I0	14_3_3 domain-containing protein; Belongs to the 14-3-3 family.
34	PgGF14-31	79200.A0A164WCX7	90.3	409.1	A0A164WCX7	14_3_3 domain-containing protein; Belongs to the 14-3-3 family.
35	PgGF14-39	79200.A0A165XRT1	85.5	408.3	A0A165XRT1	14_3_3 domain-containing protein; Belongs to the 14-3-3 family.
36	PgGF14-37	79200.A0A164ZKD0	89.2	435.3	A0A164ZKD0	14_3_3 domain-containing protein; Belongs to the 14-3-3 family.
37	PgGF14-15	79200.A0A164ZKY0	89.7	75.5	A0A164ZKY0	14_3_3 domain-containing protein; Belongs to the 14-3-3 family.
38	PgGF14-34	79200.A0A164UG53	93.4	459.9	A0A164UG53	14_3_3 domain-containing protein; Belongs to the 14-3-3 family.
39	PgGF14-30	79200.A0A164UG53	93.1	459.1	A0A164UG53	14_3_3 domain-containing protein; Belongs to the 14-3-3 family.
40	PgGF14-36	79200.A0A165XRT1	85.2	404.4	A0A165XRT1	14_3_3 domain-containing protein; Belongs to the 14-3-3 family.
41	PgGF14-8	79200.A0A166I732	93.7	459.1	A0A166I732	14_3_3 domain-containing protein; Belongs to the 14-3-3 family.
42	PgGF14-26	79200.A0A164W6I0	79	380.6	A0A164W6I0	14_3_3 domain-containing protein; Belongs to the 14-3-3 family.

## Sheet:  Interaction Relationships
Protein Interactions and functional annotation
Target genes	Interacting genes	Function Notes
PgGF14-20	79200.A0A161WQ37	HSF
PgGF14-8	79200.A0A161WQ37	HSF
PgGF14-30	79200.A0A161WQ37	HSF
PgGF14-37	79200.A0A161WQ37	HSF
PgGF14-9	79200.A0A161WQ37	HSF
PgGF14-40	79200.A0A161WQ37	HSF
PgGF14-36	79200.A0A161WQ37	HSF
PgGF14-2	79200.A0A161WQ37	HSF
PgGF14-40	79200.A0A161WTB8	ABC
PgGF14-36	79200.A0A161WTB8	ABC
PgGF14-2	79200.A0A161WTB8	ABC
PgGF14-20	79200.A0A161YKM1	BES1_N
PgGF14-35	79200.A0A161YKM1	BES1_N
PgGF14-31	79200.A0A161YKM1	BES1_N
PgGF14-26	79200.A0A161YKM1	BES1_N
PgGF14-8	79200.A0A161YKM1	BES1_N
PgGF14-30	79200.A0A161YKM1	BES1_N
PgGF14-37	79200.A0A161YKM1	BES1_N
PgGF14-9	79200.A0A161YKM1	BES1_N
PgGF14-20	79200.A0A161ZR74	MYB
PgGF14-35	79200.A0A161ZR74	MYB
PgGF14-31	79200.A0A161ZR74	MYB
PgGF14-26	79200.A0A161ZR74	MYB
PgGF14-8	79200.A0A161ZR74	MYB
PgGF14-30	79200.A0A161ZR74	MYB
PgGF14-37	79200.A0A161ZR74	MYB
PgGF14-9	79200.A0A161ZR74	MYB
PgGF14-40	79200.A0A161ZR74	MYB
PgGF14-36	79200.A0A161ZR74	MYB
PgGF14-2	79200.A0A161ZR74	MYB
PgGF14-40	79200.A0A162ALX5	A0A162ALX5
PgGF14-36	79200.A0A162ALX5	A0A162ALX5
PgGF14-2	79200.A0A162ALX5	A0A162ALX5
PgGF14-20	79200.A0A164SW64	glycosyl hydrolase 13
PgGF14-8	79200.A0A164SW64	glycosyl hydrolase 13
PgGF14-30	79200.A0A164SW64	glycosyl hydrolase 13
PgGF14-37	79200.A0A164SW64	glycosyl hydrolase 13
PgGF14-9	79200.A0A164SW64	glycosyl hydrolase 13
PgGF14-20	79200.A0A164UKP5	TC 3.A.3-1
PgGF14-20	79200.A0A164W047	TC 3.A.3-2
PgGF14-20	79200.A0A164XKC0	TC 3.A.3-3
PgGF14-20	79200.A0A164Z502	NPH3
PgGF14-8	79200.A0A164Z502	NPH3
PgGF14-30	79200.A0A164Z502	NPH3
PgGF14-37	79200.A0A164Z502	NPH3
PgGF14-9	79200.A0A164Z502	NPH3
PgGF14-40	79200.A0A164Z502	NPH3
PgGF14-36	79200.A0A164Z502	NPH3
PgGF14-2	79200.A0A164Z502	NPH3
PgGF14-8	79200.A0A166APP8	A0A166APP8
PgGF14-9	79200.A0A166APP8	A0A166APP8
PgGF14-35	79200.Hist_deacetyl	Hist_deacetyl
PgGF14-31	79200.Hist_deacetyl	Hist_deacetyl
PgGF14-40	79200.Hist_deacetyl	Hist_deacetyl
PgGF14-36	79200.Hist_deacetyl	Hist_deacetyl
PgGF14-2	79200.Hist_deacetyl	Hist_deacetyl
PgGF14-26	79200.Hist_deacetyl	Hist_deacetyl
PgGF14-20	79200.A0A166BVZ7	A0A166BVZ7
PgGF14-8	79200.A0A166BVZ7	A0A166BVZ7
PgGF14-30	79200.A0A166BVZ7	A0A166BVZ7
PgGF14-37	79200.A0A166BVZ7	A0A166BVZ7
PgGF14-9	79200.A0A166BVZ7	A0A166BVZ7
PgGF14-40	79200.A0A166E538	PK
PgGF14-36	79200.A0A166E538	PK
PgGF14-2	79200.A0A166E538	PK
PgGF14-40	79200.A0A166EQ53	A0A166EQ53
PgGF14-36	79200.A0A166EQ53	A0A166EQ53
PgGF14-2	79200.A0A166EQ53	A0A166EQ53
PgGF14-20	79200.A0A175YDA6	A0A175YDA6
PgGF14-8	79200.A0A175YDA6	A0A175YDA6
PgGF14-30	79200.A0A175YDA6	A0A175YDA6
PgGF14-37	79200.A0A175YDA6	A0A175YDA6
PgGF14-9	79200.A0A175YDA6	A0A175YDA6
PgGF14-40	79200.A0A175YGP9	A0A175YGP9
PgGF14-36	79200.A0A175YGP9	A0A175YGP9
PgGF14-2	79200.A0A175YGP9	A0A175YGP9
PgGF14-20	79200.A0A175YJ38	LHC
PgGF14-8	79200.A0A175YJ38	LHC
PgGF14-30	79200.A0A175YJ38	LHC
PgGF14-37	79200.A0A175YJ38	LHC
PgGF14-9	79200.A0A175YJ38	LHC
PgGF14-20	79200.A0A175YJR5	Aminotran_1_2
PgGF14-8	79200.A0A175YJR5	Aminotran_1_2
PgGF14-30	79200.A0A175YJR5	Aminotran_1_2
PgGF14-37	79200.A0A175YJR5	Aminotran_1_2
PgGF14-9	79200.A0A175YJR5	Aminotran_1_2
PgGF14-20	79200.A0A161YDG1	matK
PgGF14-30	79200.A0A164UG53	matK
PgGF14-37	79200.A0A164ZKD0	matK
PgGF14-8	79200.A0A162AAK0	matK
PgGF14-9	79200.A0A166I732	matK
