# Supplementary material for: Molecular analysis of the 14-3-3 genes in Panax ginseng and their responses to heat stress
Source: PeerJ. 2023 May 9;11:e15331. doi: 10.7717/peerj.15331 (PMC10178371; doi:10.7717/peerj.15331)
Supplement: Supplemental Information 7 — Interaction relationships in the table were all the predicted interactions. The over-represented TFs were the main interactions after enrichment and combined with transcription factor annotation to plot the interactions network. [file peerj-11-15331-s007.xls]

## Sheet: Interaction relationships
Corresponding homologous genes with PgGF14s and regulatory regions with transcription factors
TF	Gene name	start	end	strand	e-value	squence	species
DCAR_000539	PgGF14-38	137	145	-	3.8e-06	CTGCATGCC	Daucus carota
DCAR_000692	PgGF14-38	288	305	+	3.12e-06	TGACGTGTTATCCAAGTC	Daucus carota
DCAR_000747	PgGF14-22	348	362	-	6.86e-06	AATCGGGACCGTTGG	Daucus carota
DCAR_000747	PgGF14-29	354	368	-	6.76e-06	AATCAGGACCGTTGG	Daucus carota
DCAR_000747	PgGF14-37	367	381	-	1.99e-06	AATTCTGGCCGTTGA	Daucus carota
DCAR_000809	PgGF14-14	128	140	-	6.26e-06	ATTTGACTTTTCT	Daucus carota
DCAR_001133	PgGF14-20	70	83	-	3.26e-06	TTTTTTACCATTTT	Daucus carota
DCAR_001133	PgGF14-42	99	112	+	8.56e-06	TAATTTACCGTGGT	Daucus carota
DCAR_001346	PgGF14-38	286	306	+	1.44e-06	TGTGACGTGTTATCCAAGTCT	Daucus carota
DCAR_001346	PgGF14-38	288	308	-	4.2e-07	CAAGACTTGGATAACACGTCA	Daucus carota
DCAR_001871	PgGF14-38	285	303	-	2.69e-06	CTTGGATAACACGTCACAT	Daucus carota
DCAR_002027	PgGF14-31	487	500	-	1.77e-06	GGCCAAAAAGGTAA	Daucus carota
DCAR_002027	PgGF14-33	487	500	-	1.77e-06	GGCCAAAAAGGTAA	Daucus carota
DCAR_002048	PgGF14-31	320	328	-	5.76e-06	TCCACTTGC	Daucus carota
DCAR_002323	PgGF14-11	465	492	+	9.05e-06	CTCCTCTCTCCGCCTCTCTCTCTCCTCC	Daucus carota
DCAR_002368	PgGF14-40	192	206	+	7.59e-06	AGAATTTTCTAGATA	Daucus carota
DCAR_002896	PgGF14-1	412	426	-	4.92e-06	GATGGTGATGTGGCA	Daucus carota
DCAR_002896	PgGF14-2	413	427	-	4.92e-06	GATGGTGATGTGGCA	Daucus carota
DCAR_002896	PgGF14-23	460	474	-	4.92e-06	GATGGTGATGTGGCA	Daucus carota
DCAR_002896	PgGF14-3	460	474	-	4.92e-06	GATGGTGATGTGGCA	Daucus carota
DCAR_002897	PgGF14-1	412	426	-	4.92e-06	GATGGTGATGTGGCA	Daucus carota
DCAR_002897	PgGF14-2	413	427	-	4.92e-06	GATGGTGATGTGGCA	Daucus carota
DCAR_002897	PgGF14-23	460	474	-	4.92e-06	GATGGTGATGTGGCA	Daucus carota
DCAR_002897	PgGF14-3	460	474	-	4.92e-06	GATGGTGATGTGGCA	Daucus carota
DCAR_003095	PgGF14-1	412	426	-	4.87e-06	GATGGTGATGTGGCA	Daucus carota
DCAR_003095	PgGF14-2	413	427	-	4.87e-06	GATGGTGATGTGGCA	Daucus carota
DCAR_003095	PgGF14-23	460	474	-	4.87e-06	GATGGTGATGTGGCA	Daucus carota
DCAR_003095	PgGF14-3	460	474	-	4.87e-06	GATGGTGATGTGGCA	Daucus carota
DCAR_003163	PgGF14-33	467	481	-	9.67e-06	TAAATGGTTGGTGGT	Daucus carota
DCAR_003429	PgGF14-35	548	560	+	5.65e-06	GTAGTAGGTGAAG	Daucus carota
DCAR_003659	PgGF14-1	412	426	-	1.39e-06	GATGGTGATGTGGCA	Daucus carota
DCAR_003659	PgGF14-2	413	427	-	1.39e-06	GATGGTGATGTGGCA	Daucus carota
DCAR_003659	PgGF14-23	460	474	-	1.39e-06	GATGGTGATGTGGCA	Daucus carota
DCAR_003659	PgGF14-3	460	474	-	1.39e-06	GATGGTGATGTGGCA	Daucus carota
DCAR_004170	PgGF14-11	303	326	-	4.4e-06	GAGAAAAAACGAGAGAGGGAATTT	Daucus carota
DCAR_004170	PgGF14-11	305	328	-	4.88e-06	CTGAGAAAAAACGAGAGAGGGAAT	Daucus carota
DCAR_004170	PgGF14-11	307	330	-	8.21e-06	GACTGAGAAAAAACGAGAGAGGGA	Daucus carota
DCAR_004170	PgGF14-11	459	482	-	5.38e-06	GAGAGGCGGAGAGAGGAGAGAGAA	Daucus carota
DCAR_004170	PgGF14-11	463	486	-	3.45e-06	GAGAGAGAGGCGGAGAGAGGAGAG	Daucus carota
DCAR_004170	PgGF14-11	465	488	-	8.57e-09	GAGAGAGAGAGGCGGAGAGAGGAG	Daucus carota
DCAR_004170	PgGF14-11	467	490	-	7.63e-08	AGGAGAGAGAGAGGCGGAGAGAGG	Daucus carota
DCAR_004170	PgGF14-11	469	492	-	4.11e-08	GGAGGAGAGAGAGAGGCGGAGAGA	Daucus carota
DCAR_004170	PgGF14-11	471	494	-	2.98e-08	GAGGAGGAGAGAGAGAGGCGGAGA	Daucus carota
DCAR_004170	PgGF14-11	473	496	-	6.38e-09	GGGAGGAGGAGAGAGAGAGGCGGA	Daucus carota
DCAR_004170	PgGF14-11	475	498	-	1.66e-06	ATGGGAGGAGGAGAGAGAGAGGCG	Daucus carota
DCAR_004170	PgGF14-11	481	504	-	1.31e-06	AAGAAGATGGGAGGAGGAGAGAGA	Daucus carota
DCAR_004170	PgGF14-11	497	520	-	8.21e-06	GAGTGAGAAAGTAAGGAAGAAGAT	Daucus carota
DCAR_004170	PgGF14-11	561	584	-	1.98e-06	GAGAAAGAGAGGGGGATAGGATCT	Daucus carota
DCAR_004170	PgGF14-11	563	586	-	1.29e-07	AAGAGAAAGAGAGGGGGATAGGAT	Daucus carota
DCAR_004170	PgGF14-11	565	588	-	4.22e-06	TTAAGAGAAAGAGAGGGGGATAGG	Daucus carota
DCAR_004170	PgGF14-11	567	590	-	1.26e-06	GTTTAAGAGAAAGAGAGGGGGATA	Daucus carota
DCAR_004170	PgGF14-13	566	589	-	5.23e-06	GGGAGAGAAACAAAGAAAAGCAGC	Daucus carota
DCAR_004170	PgGF14-13	568	591	-	6.41e-06	GCGGGAGAGAAACAAAGAAAAGCA	Daucus carota
DCAR_004170	PgGF14-14	514	537	-	8.52e-07	GTGAGAGGGAAAGAGGCTGAGGAG	Daucus carota
DCAR_004170	PgGF14-14	566	589	-	5.23e-06	GGGAGAGAAACAAAGAAAAGCAGC	Daucus carota
DCAR_004170	PgGF14-14	568	591	-	6.41e-06	GCGGGAGAGAAACAAAGAAAAGCA	Daucus carota
DCAR_004170	PgGF14-16	566	589	-	8.03e-06	GGGAGAGAAACAAAGAAAAACAAC	Daucus carota
DCAR_004170	PgGF14-16	568	591	-	8.03e-06	ACGGGAGAGAAACAAAGAAAAACA	Daucus carota
DCAR_004170	PgGF14-17	566	589	-	5.23e-06	GGGAGAGAAACAAAGAAAAGCAGC	Daucus carota
DCAR_004170	PgGF14-17	568	591	-	6.41e-06	GCGGGAGAGAAACAAAGAAAAGCA	Daucus carota
DCAR_004170	PgGF14-21	102	125	-	1.82e-07	GAGAGAGGGGGAGGGAGAGCATAG	Daucus carota
DCAR_004170	PgGF14-21	104	127	-	6.19e-08	GAGAGAGAGGGGGAGGGAGAGCAT	Daucus carota
DCAR_004170	PgGF14-21	106	129	-	1.52e-09	GGGAGAGAGAGGGGGAGGGAGAGC	Daucus carota
DCAR_004170	PgGF14-21	108	131	-	4.83e-11	GGGGGAGAGAGAGGGGGAGGGAGA	Daucus carota
DCAR_004170	PgGF14-21	110	133	-	1.83e-10	GAGGGGGAGAGAGAGGGGGAGGGA	Daucus carota
DCAR_004170	PgGF14-21	112	135	-	6.79e-10	GGGAGGGGGAGAGAGAGGGGGAGG	Daucus carota
DCAR_004170	PgGF14-21	114	137	-	4.61e-09	GGGGGAGGGGGAGAGAGAGGGGGA	Daucus carota
DCAR_004170	PgGF14-21	116	139	-	1.67e-06	TTGGGGGAGGGGGAGAGAGAGGGG	Daucus carota
DCAR_004170	PgGF14-21	118	141	-	3.7e-06	TCTTGGGGGAGGGGGAGAGAGAGG	Daucus carota
DCAR_004170	PgGF14-26	116	139	-	7.81e-06	AAAAAAAAAAAAAAGAAAGAAAGA	Daucus carota
DCAR_004170	PgGF14-26	175	198	+	3.19e-06	ATGAAAGAAAAAGAAAAAGAAAAA	Daucus carota
DCAR_004170	PgGF14-26	177	200	+	2.37e-07	GAAAGAAAAAGAAAAAGAAAAAGA	Daucus carota
DCAR_004170	PgGF14-26	179	202	+	4.83e-07	AAGAAAAAGAAAAAGAAAAAGAAA	Daucus carota
DCAR_004170	PgGF14-26	181	204	+	2.33e-06	GAAAAAGAAAAAGAAAAAGAAAAA	Daucus carota
DCAR_004170	PgGF14-26	183	206	+	9.25e-07	AAAAGAAAAAGAAAAAGAAAAAGA	Daucus carota
DCAR_004170	PgGF14-26	185	208	+	4.83e-07	AAGAAAAAGAAAAAGAAAAAGAAA	Daucus carota
DCAR_004170	PgGF14-26	187	210	+	2.33e-06	GAAAAAGAAAAAGAAAAAGAAAAA	Daucus carota
DCAR_004170	PgGF14-26	189	212	+	9.25e-07	AAAAGAAAAAGAAAAAGAAAAAGA	Daucus carota
DCAR_004170	PgGF14-26	191	214	+	4.83e-07	AAGAAAAAGAAAAAGAAAAAGAAA	Daucus carota
DCAR_004170	PgGF14-26	193	216	+	5.79e-06	GAAAAAGAAAAAGAAAAAGAAAAG	Daucus carota
DCAR_004170	PgGF14-26	197	220	+	5.79e-06	AAGAAAAAGAAAAAGAAAAGAAAA	Daucus carota
DCAR_004170	PgGF14-26	309	332	-	4.2e-06	GAGAGAGAGAGAGAGGACCTGATA	Daucus carota
DCAR_004170	PgGF14-26	311	334	-	2.58e-09	GAGAGAGAGAGAGAGAGGACCTGA	Daucus carota
DCAR_004170	PgGF14-26	313	336	-	5.31e-10	GAGAGAGAGAGAGAGAGAGGACCT	Daucus carota
DCAR_004170	PgGF14-26	315	338	-	2.63e-12	GAGAGAGAGAGAGAGAGAGAGGAC	Daucus carota
DCAR_004170	PgGF14-26	317	340	-	2.99e-15	GAGAGAGAGAGAGAGAGAGAGAGG	Daucus carota
DCAR_004170	PgGF14-26	319	342	-	1.14e-15	GAGAGAGAGAGAGAGAGAGAGAGA	Daucus carota
DCAR_004170	PgGF14-26	321	344	-	1.14e-15	GAGAGAGAGAGAGAGAGAGAGAGA	Daucus carota
DCAR_004170	PgGF14-26	323	346	-	4.09e-13	ATGAGAGAGAGAGAGAGAGAGAGA	Daucus carota
DCAR_004170	PgGF14-26	325	348	-	8.32e-10	ATATGAGAGAGAGAGAGAGAGAGA	Daucus carota
DCAR_004170	PgGF14-26	327	350	-	5.02e-07	AAATATGAGAGAGAGAGAGAGAGA	Daucus carota
DCAR_004170	PgGF14-26	329	352	-	7.47e-06	TAAAATATGAGAGAGAGAGAGAGA	Daucus carota
DCAR_004170	PgGF14-26	331	354	-	7.85e-06	TCTAAAATATGAGAGAGAGAGAGA	Daucus carota
DCAR_004170	PgGF14-26	463	486	-	1.44e-06	GAGAGAGAGAGAATAGAGAAAATA	Daucus carota
DCAR_004170	PgGF14-26	467	490	-	2.45e-08	GAGAGAGAGAGAGAGAATAGAGAA	Daucus carota
DCAR_004170	PgGF14-26	469	492	-	2.78e-09	GAGAGAGAGAGAGAGAGAATAGAG	Daucus carota
DCAR_004170	PgGF14-26	471	494	-	2.83e-09	ATGAGAGAGAGAGAGAGAGAATAG	Daucus carota
DCAR_004170	PgGF14-26	473	496	-	4.2e-08	ATATGAGAGAGAGAGAGAGAGAAT	Daucus carota
DCAR_004170	PgGF14-26	475	498	-	2.89e-06	ATATATGAGAGAGAGAGAGAGAGA	Daucus carota
DCAR_004170	PgGF14-27	566	589	-	5.23e-06	GGGAGAGAAACAAAGAAAAGCAGC	Daucus carota
DCAR_004170	PgGF14-27	568	591	-	6.41e-06	GCGGGAGAGAAACAAAGAAAAGCA	Daucus carota
DCAR_004170	PgGF14-29	111	134	-	8.25e-06	AAGAAAAGGAAAGAAAAGAAGTGA	Daucus carota
DCAR_004170	PgGF14-29	313	336	-	4.2e-06	GAGAGAGAGAGAGAGGACCTGATA	Daucus carota
DCAR_004170	PgGF14-29	315	338	-	2.58e-09	GAGAGAGAGAGAGAGAGGACCTGA	Daucus carota
DCAR_004170	PgGF14-29	317	340	-	5.31e-10	GAGAGAGAGAGAGAGAGAGGACCT	Daucus carota
DCAR_004170	PgGF14-29	319	342	-	2.63e-12	GAGAGAGAGAGAGAGAGAGAGGAC	Daucus carota
DCAR_004170	PgGF14-29	321	344	-	2.6e-12	ATGAGAGAGAGAGAGAGAGAGAGG	Daucus carota
DCAR_004170	PgGF14-29	323	346	-	8.32e-10	ATATGAGAGAGAGAGAGAGAGAGA	Daucus carota
DCAR_004170	PgGF14-29	325	348	-	5.02e-07	AAATATGAGAGAGAGAGAGAGAGA	Daucus carota
DCAR_004170	PgGF14-31	499	522	-	3.03e-06	GAGATAGAAAATGGGAAAGAAGGG	Daucus carota
DCAR_004170	PgGF14-31	501	524	-	4.06e-06	AGGAGATAGAAAATGGGAAAGAAG	Daucus carota
DCAR_004170	PgGF14-31	522	545	-	5.83e-06	GATTAGTAGAGAAGTAGAAAGAGG	Daucus carota
DCAR_004170	PgGF14-33	499	522	-	3.03e-06	GAGATAGAAAATGGGAAAGAAGGG	Daucus carota
DCAR_004170	PgGF14-33	501	524	-	4.06e-06	AGGAGATAGAAAATGGGAAAGAAG	Daucus carota
DCAR_004170	PgGF14-37	462	485	-	8.03e-06	GATAGATATAGGCGGAGAGAGGAG	Daucus carota
DCAR_004170	PgGF14-40	562	585	-	6.63e-06	GTTAGAGAAAGAAAGAGAAGTCTA	Daucus carota
DCAR_004170	PgGF14-40	564	587	-	2.7e-06	AAGTTAGAGAAAGAAAGAGAAGTC	Daucus carota
DCAR_004170	PgGF14-40	568	591	-	4.55e-07	AAAAAAGTTAGAGAAAGAAAGAGA	Daucus carota
DCAR_004170	PgGF14-42	401	424	+	1.8e-06	TCGGGAAAAAGAGAGAGAAAAATA	Daucus carota
DCAR_004170	PgGF14-42	403	426	+	3.03e-08	GGGAAAAAGAGAGAGAAAAATAGA	Daucus carota
DCAR_004170	PgGF14-42	405	428	+	7.59e-07	GAAAAAGAGAGAGAAAAATAGAAC	Daucus carota
DCAR_004170	PgGF14-42	407	430	+	1.39e-06	AAAAGAGAGAGAAAAATAGAACAA	Daucus carota
DCAR_004170	PgGF14-42	409	432	+	2.72e-06	AAGAGAGAGAAAAATAGAACAATT	Daucus carota
DCAR_004170	PgGF14-5	51	74	-	5.26e-06	GAGATAAATACAGAGGTAGATAGA	Daucus carota
DCAR_004170	PgGF14-5	566	589	-	5.44e-06	GGGAGAGAAACAAAGAAAAGCAGT	Daucus carota
DCAR_004170	PgGF14-5	568	591	-	6.41e-06	GCGGGAGAGAAACAAAGAAAAGCA	Daucus carota
DCAR_004170	PgGF14-6	566	589	-	1.43e-06	GGGAGAGAAACAAAGAAAAGCAGA	Daucus carota
DCAR_004170	PgGF14-6	568	591	-	6.41e-06	GCGGGAGAGAAACAAAGAAAAGCA	Daucus carota
DCAR_004170	PgGF14-7	524	547	-	5.38e-06	GAGAGAGGAAAAGGGGGTTAGTTG	Daucus carota
DCAR_004170	PgGF14-7	528	551	-	2.96e-06	GAAAGAGAGAGGAAAAGGGGGTTA	Daucus carota
DCAR_004170	PgGF14-7	530	553	-	7.6e-09	GAGAAAGAGAGAGGAAAAGGGGGT	Daucus carota
DCAR_004170	PgGF14-7	532	555	-	1.13e-09	GAGAGAAAGAGAGAGGAAAAGGGG	Daucus carota
DCAR_004170	PgGF14-7	534	557	-	8.17e-09	GTGAGAGAAAGAGAGAGGAAAAGG	Daucus carota
DCAR_004170	PgGF14-7	536	559	-	2.56e-08	TAGTGAGAGAAAGAGAGAGGAAAA	Daucus carota
DCAR_004170	PgGF14-7	538	561	-	6.75e-06	TTTAGTGAGAGAAAGAGAGAGGAA	Daucus carota
DCAR_004170	PgGF14-7	540	563	-	1.2e-06	ATTTTAGTGAGAGAAAGAGAGAGG	Daucus carota
DCAR_004170	PgGF14-8	530	553	-	1.74e-07	GAGAAAGAGAGAGGAAGAGGTGTT	Daucus carota
DCAR_004170	PgGF14-8	532	555	-	1.53e-09	GAGAGAAAGAGAGAGGAAGAGGTG	Daucus carota
DCAR_004170	PgGF14-8	534	557	-	1.27e-09	GTGAGAGAAAGAGAGAGGAAGAGG	Daucus carota
DCAR_004170	PgGF14-8	536	559	-	3.26e-09	TAGTGAGAGAAAGAGAGAGGAAGA	Daucus carota
DCAR_004170	PgGF14-8	538	561	-	6.75e-06	TTTAGTGAGAGAAAGAGAGAGGAA	Daucus carota
DCAR_004170	PgGF14-8	540	563	-	1.2e-06	ATTTTAGTGAGAGAAAGAGAGAGG	Daucus carota
DCAR_004239	PgGF14-24	494	507	-	1.8e-06	AAAGAAACACGTGA	Daucus carota
DCAR_004466	PgGF14-13	497	509	-	6.99e-06	ATTTCAGATCTGG	Daucus carota
DCAR_004466	PgGF14-14	489	501	-	6.99e-06	ATTTCAGATCTGG	Daucus carota
DCAR_004466	PgGF14-16	489	501	-	6.99e-06	ATTTCAGATCTGG	Daucus carota
DCAR_004466	PgGF14-17	491	503	-	6.99e-06	ATTTCAGATCTGG	Daucus carota
DCAR_004466	PgGF14-19	573	585	+	8.01e-07	AATTCAGATCTGA	Daucus carota
DCAR_004466	PgGF14-27	483	495	-	6.99e-06	ATTTCAGATCTGG	Daucus carota
DCAR_004466	PgGF14-5	482	494	-	6.99e-06	ATTTCAGATCTGG	Daucus carota
DCAR_004466	PgGF14-6	491	503	-	6.99e-06	ATTTCAGATCTGG	Daucus carota
DCAR_004494	PgGF14-22	348	362	-	7.3e-06	AATCGGGACCGTTGG	Daucus carota
DCAR_004494	PgGF14-29	354	368	-	6.55e-06	AATCAGGACCGTTGG	Daucus carota
DCAR_004494	PgGF14-37	367	381	-	5.08e-07	AATTCTGGCCGTTGA	Daucus carota
DCAR_005083	PgGF14-4	479	489	+	3.66e-06	CAAAGTCAACC	Daucus carota
DCAR_005143	PgGF14-4	479	489	+	9.52e-06	CAAAGTCAACC	Daucus carota
DCAR_005165	PgGF14-15	507	517	+	7.73e-06	TACACGTGTCC	Daucus carota
DCAR_005319	PgGF14-11	264	284	+	1.26e-06	ATTCCTTTTTTTTTCTTCTTT	Daucus carota
DCAR_005319	PgGF14-11	268	288	+	3.97e-06	CTTTTTTTTTCTTCTTTTTTT	Daucus carota
DCAR_005319	PgGF14-11	269	289	+	6.89e-06	TTTTTTTTTCTTCTTTTTTTC	Daucus carota
DCAR_005319	PgGF14-20	68	88	-	7.66e-06	TATACTTTTTTACCATTTTTT	Daucus carota
DCAR_005319	PgGF14-21	468	488	-	1.22e-07	TTTTCTTTTTTTTTCTTTTTG	Daucus carota
DCAR_005319	PgGF14-21	473	493	-	7.65e-08	CTTTCTTTTCTTTTTTTTTCT	Daucus carota
DCAR_005319	PgGF14-21	477	497	-	9.2e-07	TTTTCTTTCTTTTCTTTTTTT	Daucus carota
DCAR_005319	PgGF14-26	117	137	+	6.9e-07	CTTTCTTTCTTTTTTTTTTTT	Daucus carota
DCAR_005319	PgGF14-26	121	141	+	4.28e-08	CTTTCTTTTTTTTTTTTTTTA	Daucus carota
DCAR_005319	PgGF14-26	122	142	+	5.33e-06	TTTCTTTTTTTTTTTTTTTAT	Daucus carota
DCAR_005319	PgGF14-26	177	197	-	6.03e-08	TTTTCTTTTTCTTTTTCTTTC	Daucus carota
DCAR_005319	PgGF14-26	182	202	-	7.17e-06	TTTCTTTTTCTTTTTCTTTTT	Daucus carota
DCAR_005319	PgGF14-26	183	203	-	1.07e-08	TTTTCTTTTTCTTTTTCTTTT	Daucus carota
DCAR_005319	PgGF14-26	188	208	-	7.17e-06	TTTCTTTTTCTTTTTCTTTTT	Daucus carota
DCAR_005319	PgGF14-26	189	209	-	1.07e-08	TTTTCTTTTTCTTTTTCTTTT	Daucus carota
DCAR_005319	PgGF14-26	194	214	-	7.17e-06	TTTCTTTTTCTTTTTCTTTTT	Daucus carota
DCAR_005319	PgGF14-26	195	215	-	1.07e-08	TTTTCTTTTTCTTTTTCTTTT	Daucus carota
DCAR_005319	PgGF14-26	200	220	-	2.21e-08	TTTTCTTTTCTTTTTCTTTTT	Daucus carota
DCAR_005319	PgGF14-26	221	241	-	4.26e-06	TCTGCTTTTTCTGTTCTGTTC	Daucus carota
DCAR_005319	PgGF14-26	228	248	-	2.68e-06	TTTACTTTCTGCTTTTTCTGT	Daucus carota
DCAR_005319	PgGF14-29	118	138	+	3.7e-06	TTTTCTTTCCTTTTCTTTTTT	Daucus carota
DCAR_005319	PgGF14-29	122	142	+	2.57e-06	CTTTCCTTTTCTTTTTTTTAT	Daucus carota
DCAR_005319	PgGF14-29	123	143	+	1.81e-06	TTTCCTTTTCTTTTTTTTATA	Daucus carota
DCAR_005319	PgGF14-29	176	196	-	1.03e-06	TTTTCTTTTCTTTTTCTTTAA	Daucus carota
DCAR_005319	PgGF14-29	181	201	-	2.54e-07	TTTTCTTTTCTTTTCTTTTTC	Daucus carota
DCAR_005319	PgGF14-29	186	206	-	1.72e-07	TTTTCTTTTCTTTTCTTTTCT	Daucus carota
DCAR_005319	PgGF14-29	191	211	-	1.72e-07	TTTTCTTTTCTTTTCTTTTCT	Daucus carota
DCAR_005319	PgGF14-29	197	217	-	1.22e-07	TCTGCTTTTTCTTTTCTTTTC	Daucus carota
DCAR_005319	PgGF14-29	204	224	-	3.54e-06	TCTGCTTTCTGCTTTTTCTTT	Daucus carota
DCAR_005319	PgGF14-6	566	586	+	5.11e-06	TCTGCTTTTCTTTGTTTCTCT	Daucus carota
DCAR_006433	PgGF14-13	493	507	+	3.09e-06	GAGGCCAGATCTGAA	Daucus carota
DCAR_006433	PgGF14-13	496	510	-	8.71e-06	GATTTCAGATCTGGC	Daucus carota
DCAR_006433	PgGF14-14	485	499	+	3.09e-06	GAGGCCAGATCTGAA	Daucus carota
DCAR_006433	PgGF14-14	488	502	-	8.71e-06	GATTTCAGATCTGGC	Daucus carota
DCAR_006433	PgGF14-16	485	499	+	3.09e-06	GAGGCCAGATCTGAA	Daucus carota
DCAR_006433	PgGF14-16	488	502	-	8.71e-06	GATTTCAGATCTGGC	Daucus carota
DCAR_006433	PgGF14-17	487	501	+	3.09e-06	GAGGCCAGATCTGAA	Daucus carota
DCAR_006433	PgGF14-17	490	504	-	8.71e-06	GATTTCAGATCTGGC	Daucus carota
DCAR_006433	PgGF14-19	572	586	+	2.78e-06	CAATTCAGATCTGAA	Daucus carota
DCAR_006433	PgGF14-27	479	493	+	3.09e-06	GAGGCCAGATCTGAA	Daucus carota
DCAR_006433	PgGF14-27	482	496	-	8.71e-06	GATTTCAGATCTGGC	Daucus carota
DCAR_006433	PgGF14-5	478	492	+	3.09e-06	GAGGCCAGATCTGAA	Daucus carota
DCAR_006433	PgGF14-5	481	495	-	8.71e-06	GATTTCAGATCTGGC	Daucus carota
DCAR_006433	PgGF14-6	487	501	+	3.09e-06	GAGGCCAGATCTGAA	Daucus carota
DCAR_006899	PgGF14-41	463	470	+	9.31e-06	GGACCCAC	Daucus carota
DCAR_006899	PgGF14-42	465	472	+	9.31e-06	GGACCCAC	Daucus carota
DCAR_006918	PgGF14-31	401	415	-	5.7e-06	GATGTGGTTGGTGAC	Daucus carota
DCAR_006918	PgGF14-35	545	559	+	5.91e-06	AAAGTAGTAGGTGAA	Daucus carota
DCAR_006949	PgGF14-4	479	491	+	6.79e-06	CAAAGTCAACCTA	Daucus carota
DCAR_006961	PgGF14-1	412	426	+	3.34e-06	TGCCACATCACCATC	Daucus carota
DCAR_006961	PgGF14-2	413	427	+	3.34e-06	TGCCACATCACCATC	Daucus carota
DCAR_006961	PgGF14-23	460	474	+	3.34e-06	TGCCACATCACCATC	Daucus carota
DCAR_006961	PgGF14-3	460	474	+	3.34e-06	TGCCACATCACCATC	Daucus carota
DCAR_006961	PgGF14-31	301	315	-	1.28e-06	TGCCACGTGAAAAAC	Daucus carota
DCAR_007539	PgGF14-1	413	424	-	9.52e-06	TGGTGATGTGGC	Daucus carota
DCAR_007539	PgGF14-2	414	425	-	9.52e-06	TGGTGATGTGGC	Daucus carota
DCAR_007539	PgGF14-23	461	472	-	9.52e-06	TGGTGATGTGGC	Daucus carota
DCAR_007539	PgGF14-3	461	472	-	9.52e-06	TGGTGATGTGGC	Daucus carota
DCAR_007945	PgGF14-10	416	430	+	9.19e-06	AAAAATCCGGCGACC	Daucus carota
DCAR_007988	PgGF14-9	193	202	-	5.89e-06	TTGTCGGAGA	Daucus carota
DCAR_008106	PgGF14-24	494	507	-	1.8e-06	AAAGAAACACGTGA	Daucus carota
DCAR_008218	PgGF14-1	412	426	-	8.46e-06	GATGGTGATGTGGCA	Daucus carota
DCAR_008218	PgGF14-15	457	471	+	2.59e-06	CTTCTCCACGTGGCA	Daucus carota
DCAR_008218	PgGF14-15	460	474	-	6.46e-06	TGATGCCACGTGGAG	Daucus carota
DCAR_008218	PgGF14-2	413	427	-	8.46e-06	GATGGTGATGTGGCA	Daucus carota
DCAR_008218	PgGF14-23	460	474	-	8.46e-06	GATGGTGATGTGGCA	Daucus carota
DCAR_008218	PgGF14-3	460	474	-	8.46e-06	GATGGTGATGTGGCA	Daucus carota
DCAR_008218	PgGF14-31	301	315	+	5.07e-07	GTTTTTCACGTGGCA	Daucus carota
DCAR_009089	PgGF14-15	515	533	+	3.04e-06	TCCCCCCAACAACTACCCC	Daucus carota
DCAR_009089	PgGF14-25	411	429	-	7.56e-06	TGACTACAACTACCTCTAT	Daucus carota
DCAR_009089	PgGF14-31	400	418	+	6.48e-06	GGTCACCAACCACATCTCT	Daucus carota
DCAR_009089	PgGF14-8	519	537	+	9.1e-06	CTATCTCAACTAACACCTC	Daucus carota
DCAR_009235	PgGF14-33	483	497	+	1.69e-06	TCTTTTACCTTTTTG	Daucus carota
DCAR_009235	PgGF14-39	427	441	-	6.83e-07	ATTTTTCCCTTTTTG	Daucus carota
DCAR_009408	PgGF14-41	461	470	+	4.59e-06	AGGGACCCAC	Daucus carota
DCAR_009408	PgGF14-42	463	472	+	4.59e-06	AGGGACCCAC	Daucus carota
DCAR_009603	PgGF14-16	84	102	+	2.18e-07	ACTTTACTTGGTGGCCAAG	Daucus carota
DCAR_009603	PgGF14-38	285	303	+	5.71e-06	ATGTGACGTGTTATCCAAG	Daucus carota
DCAR_010064	PgGF14-34	493	506	-	7.88e-06	GACAAAATATCTGA	Daucus carota
DCAR_010092	PgGF14-7	446	457	-	5.91e-06	GAGACAGCTGTT	Daucus carota
DCAR_010092	PgGF14-8	445	456	+	6.65e-06	TTTACAGCTGTC	Daucus carota
DCAR_010092	PgGF14-8	447	458	-	4.31e-06	GAGACAGCTGTA	Daucus carota
DCAR_010178	PgGF14-15	509	522	+	3.57e-06	CACGTGTCCCCCCA	Daucus carota
DCAR_010178	PgGF14-24	487	500	-	3.65e-06	CACGTGACCAGTAA	Daucus carota
DCAR_010506	PgGF14-14	459	468	+	3.44e-07	TGCCCTAGCC	Daucus carota
DCAR_010506	PgGF14-16	459	468	+	3.44e-07	TGCCCTAGCC	Daucus carota
DCAR_010506	PgGF14-17	462	471	+	3.44e-07	TGCCCTAGCC	Daucus carota
DCAR_010506	PgGF14-5	453	462	+	3.44e-07	TGCCCTAGCC	Daucus carota
DCAR_010506	PgGF14-6	462	471	+	3.44e-07	TGCCCTAGCC	Daucus carota
DCAR_010628	PgGF14-37	482	502	+	9.81e-06	TATCCTCCGCCAATCTCTCTC	Daucus carota
DCAR_010791	PgGF14-2	399	411	-	8.4e-06	CGACGGTAGGTTT	Daucus carota
DCAR_010862	PgGF14-4	478	491	-	5.29e-06	TAGGTTGACTTTGG	Daucus carota
DCAR_011130	PgGF14-15	515	533	-	9.39e-07	GGGGTAGTTGTTGGGGGGA	Daucus carota
DCAR_011130	PgGF14-31	359	377	-	3.46e-06	GGGCAAGTTGGTGGGGGGG	Daucus carota
DCAR_011286	PgGF14-35	547	559	-	5.27e-06	TTCACCTACTACT	Daucus carota
DCAR_011934	PgGF14-36	9	22	-	6.18e-06	GAGGACGGAGGGAG	Daucus carota
DCAR_012021	PgGF14-6	9	23	+	9.62e-06	GGCTTGAAATTGAAG	Daucus carota
DCAR_012077	PgGF14-40	193	203	-	8.07e-06	CTAGAAAATTC	Daucus carota
DCAR_012521	PgGF14-4	479	489	+	2.71e-06	CAAAGTCAACC	Daucus carota
DCAR_013121	PgGF14-9	172	186	+	7.79e-06	ATTGCGCCGTCGTAC	Daucus carota
DCAR_013176	PgGF14-38	358	379	+	9.17e-06	GACGTATTCCTGAAGACTTCTT	Daucus carota
DCAR_013521	PgGF14-9	203	215	+	3.8e-06	AAAAGAATATCCC	Daucus carota
DCAR_013728	PgGF14-15	512	532	+	2.45e-06	GTGTCCCCCCAACAACTACCC	Daucus carota
DCAR_013728	PgGF14-15	515	535	+	7.74e-06	TCCCCCCAACAACTACCCCGC	Daucus carota
DCAR_013728	PgGF14-31	356	376	+	6.32e-06	TGGCCCCCCCACCAACTTGCC	Daucus carota
DCAR_013728	PgGF14-31	394	414	+	1.09e-06	AAACCAGGTCACCAACCACAT	Daucus carota
DCAR_013728	PgGF14-31	460	480	+	8.92e-06	CATGACAACCACCAACCATTG	Daucus carota
DCAR_013728	PgGF14-33	460	480	+	9.79e-06	CATGACAACCACCAACCATTT	Daucus carota
DCAR_013728	PgGF14-35	546	566	-	8.35e-06	GCTAAGCTTCACCTACTACTT	Daucus carota
DCAR_013845	PgGF14-38	386	395	+	8.27e-06	CCCCTAGAGC	Daucus carota
DCAR_013939	PgGF14-38	287	304	-	5.15e-06	ACTTGGATAACACGTCAC	Daucus carota
DCAR_014006	PgGF14-27	101	111	+	9.04e-06	TCATTAATTGC	Daucus carota
DCAR_014143	PgGF14-16	87	102	-	3.6e-06	CTTGGCCACCAAGTAA	Daucus carota
DCAR_014214	PgGF14-31	398	418	-	1.53e-06	AGAGATGTGGTTGGTGACCTG	Daucus carota
DCAR_014214	PgGF14-35	542	562	+	1.18e-06	GAGAAAGTAGTAGGTGAAGCT	Daucus carota
DCAR_014340	PgGF14-38	286	306	+	1.44e-06	TGTGACGTGTTATCCAAGTCT	Daucus carota
DCAR_014340	PgGF14-38	288	308	-	4.2e-07	CAAGACTTGGATAACACGTCA	Daucus carota
DCAR_014495	PgGF14-33	329	337	-	6.12e-06	GGGGCCCAT	Daucus carota
DCAR_014495	PgGF14-41	462	470	+	3.41e-06	GGGACCCAC	Daucus carota
DCAR_014495	PgGF14-42	464	472	+	3.41e-06	GGGACCCAC	Daucus carota
DCAR_014591	PgGF14-40	193	204	+	5.78e-06	GAATTTTCTAGA	Daucus carota
DCAR_014851	PgGF14-18	388	402	-	9.98e-06	GAATCTGGACCGTTG	Daucus carota
DCAR_014851	PgGF14-22	349	363	-	6.32e-06	GAATCGGGACCGTTG	Daucus carota
DCAR_014851	PgGF14-26	357	371	-	9.98e-06	GAATCTGGACCGTTG	Daucus carota
DCAR_014851	PgGF14-29	355	369	-	4.97e-06	AAATCAGGACCGTTG	Daucus carota
DCAR_014851	PgGF14-37	368	382	-	1.22e-07	AAATTCTGGCCGTTG	Daucus carota
DCAR_015806	PgGF14-15	519	533	+	2.45e-06	CCCAACAACTACCCC	Daucus carota
DCAR_015806	PgGF14-28	486	500	-	8.68e-06	CCCACCAAACAGCGA	Daucus carota
DCAR_015806	PgGF14-31	363	377	+	6.54e-06	CCCACCAACTTGCCC	Daucus carota
DCAR_015806	PgGF14-31	401	415	+	2.23e-06	GTCACCAACCACATC	Daucus carota
DCAR_015806	PgGF14-31	467	481	+	3.92e-06	ACCACCAACCATTGC	Daucus carota
DCAR_015806	PgGF14-40	480	494	-	8.68e-06	CCCACCAAACAGCGA	Daucus carota
DCAR_015806	PgGF14-8	523	537	+	9.99e-06	CTCAACTAACACCTC	Daucus carota
DCAR_015921	PgGF14-1	475	495	-	9.87e-06	TTCTGTTCTCGCCCTTTTCCT	Daucus carota
DCAR_015921	PgGF14-11	265	285	+	1.43e-07	TTCCTTTTTTTTTCTTCTTTT	Daucus carota
DCAR_015921	PgGF14-11	266	286	+	2.26e-07	TCCTTTTTTTTTCTTCTTTTT	Daucus carota
DCAR_015921	PgGF14-11	268	288	+	1.56e-07	CTTTTTTTTTCTTCTTTTTTT	Daucus carota
DCAR_015921	PgGF14-11	269	289	+	1.5e-07	TTTTTTTTTCTTCTTTTTTTC	Daucus carota
DCAR_015921	PgGF14-11	271	291	+	6.69e-06	TTTTTTTCTTCTTTTTTTCTA	Daucus carota
DCAR_015921	PgGF14-11	272	292	+	1.26e-06	TTTTTTCTTCTTTTTTTCTAT	Daucus carota
DCAR_015921	PgGF14-11	452	472	+	7.35e-06	GCCCACTTTCTCTCTCCTCTC	Daucus carota
DCAR_015921	PgGF14-11	465	485	+	2.55e-06	CTCCTCTCTCCGCCTCTCTCT	Daucus carota
DCAR_015921	PgGF14-11	471	491	+	1.74e-06	TCTCCGCCTCTCTCTCTCCTC	Daucus carota
DCAR_015921	PgGF14-13	568	588	+	2.19e-06	TGCTTTTCTTTGTTTCTCTCC	Daucus carota
DCAR_015921	PgGF14-13	570	590	+	3.08e-07	CTTTTCTTTGTTTCTCTCCCG	Daucus carota
DCAR_015921	PgGF14-14	568	588	+	2.19e-06	TGCTTTTCTTTGTTTCTCTCC	Daucus carota
DCAR_015921	PgGF14-14	570	590	+	3.08e-07	CTTTTCTTTGTTTCTCTCCCG	Daucus carota
DCAR_015921	PgGF14-16	566	586	+	7.26e-06	GTTGTTTTTCTTTGTTTCTCT	Daucus carota
DCAR_015921	PgGF14-16	568	588	+	8.09e-07	TGTTTTTCTTTGTTTCTCTCC	Daucus carota
DCAR_015921	PgGF14-16	570	590	+	2e-07	TTTTTCTTTGTTTCTCTCCCG	Daucus carota
DCAR_015921	PgGF14-17	568	588	+	2.19e-06	TGCTTTTCTTTGTTTCTCTCC	Daucus carota
DCAR_015921	PgGF14-17	570	590	+	3.08e-07	CTTTTCTTTGTTTCTCTCCCG	Daucus carota
DCAR_015921	PgGF14-20	475	495	-	5.12e-07	CTTTTTTTTTTTTCTTTTTGA	Daucus carota
DCAR_015921	PgGF14-21	106	126	+	2.07e-06	GCTCTCCCTCCCCCTCTCTCT	Daucus carota
DCAR_015921	PgGF14-21	112	132	+	1.48e-06	CCTCCCCCTCTCTCTCCCCCT	Daucus carota
DCAR_015921	PgGF14-21	467	487	-	1.85e-07	TTTCTTTTTTTTTCTTTTTGA	Daucus carota
DCAR_015921	PgGF14-21	469	489	-	1.07e-08	CTTTTCTTTTTTTTTCTTTTT	Daucus carota
DCAR_015921	PgGF14-21	470	490	-	5.89e-07	TCTTTTCTTTTTTTTTCTTTT	Daucus carota
DCAR_015921	PgGF14-21	471	491	-	3.45e-07	TTCTTTTCTTTTTTTTTCTTT	Daucus carota
DCAR_015921	PgGF14-21	473	493	-	6.33e-08	CTTTCTTTTCTTTTTTTTTCT	Daucus carota
DCAR_015921	PgGF14-21	474	494	-	8.09e-07	TCTTTCTTTTCTTTTTTTTTC	Daucus carota
DCAR_015921	PgGF14-21	475	495	-	1.41e-07	TTCTTTCTTTTCTTTTTTTTT	Daucus carota
DCAR_015921	PgGF14-21	476	496	-	9.45e-08	TTTCTTTCTTTTCTTTTTTTT	Daucus carota
DCAR_015921	PgGF14-21	479	499	-	7.09e-07	CCTTTTCTTTCTTTTCTTTTT	Daucus carota
DCAR_015921	PgGF14-25	152	172	+	1.24e-06	CCCTTTTTTCTTTGTTTTTCG	Daucus carota
DCAR_015921	PgGF14-26	114	134	+	2.48e-08	CTTCTTTCTTTCTTTTTTTTT	Daucus carota
DCAR_015921	PgGF14-26	115	135	+	1.67e-06	TTCTTTCTTTCTTTTTTTTTT	Daucus carota
DCAR_015921	PgGF14-26	116	136	+	1.51e-08	TCTTTCTTTCTTTTTTTTTTT	Daucus carota
DCAR_015921	PgGF14-26	118	138	+	1.98e-08	TTTCTTTCTTTTTTTTTTTTT	Daucus carota
DCAR_015921	PgGF14-26	119	139	+	1.88e-07	TTCTTTCTTTTTTTTTTTTTT	Daucus carota
DCAR_015921	PgGF14-26	120	140	+	2.03e-08	TCTTTCTTTTTTTTTTTTTTT	Daucus carota
DCAR_015921	PgGF14-26	121	141	+	9.35e-07	CTTTCTTTTTTTTTTTTTTTA	Daucus carota
DCAR_015921	PgGF14-26	122	142	+	2.75e-07	TTTCTTTTTTTTTTTTTTTAT	Daucus carota
DCAR_015921	PgGF14-26	176	196	-	3.18e-08	TTTCTTTTTCTTTTTCTTTCA	Daucus carota
DCAR_015921	PgGF14-26	177	197	-	6.93e-06	TTTTCTTTTTCTTTTTCTTTC	Daucus carota
DCAR_015921	PgGF14-26	178	198	-	1.81e-08	TTTTTCTTTTTCTTTTTCTTT	Daucus carota
DCAR_015921	PgGF14-26	179	199	-	6.85e-07	CTTTTTCTTTTTCTTTTTCTT	Daucus carota
DCAR_015921	PgGF14-26	180	200	-	1.17e-08	TCTTTTTCTTTTTCTTTTTCT	Daucus carota
DCAR_015921	PgGF14-26	182	202	-	9.16e-10	TTTCTTTTTCTTTTTCTTTTT	Daucus carota
DCAR_015921	PgGF14-26	183	203	-	4e-06	TTTTCTTTTTCTTTTTCTTTT	Daucus carota
DCAR_015921	PgGF14-26	184	204	-	1.81e-08	TTTTTCTTTTTCTTTTTCTTT	Daucus carota
DCAR_015921	PgGF14-26	185	205	-	6.85e-07	CTTTTTCTTTTTCTTTTTCTT	Daucus carota
DCAR_015921	PgGF14-26	186	206	-	1.17e-08	TCTTTTTCTTTTTCTTTTTCT	Daucus carota
DCAR_015921	PgGF14-26	188	208	-	9.16e-10	TTTCTTTTTCTTTTTCTTTTT	Daucus carota
DCAR_015921	PgGF14-26	189	209	-	4e-06	TTTTCTTTTTCTTTTTCTTTT	Daucus carota
DCAR_015921	PgGF14-26	190	210	-	1.81e-08	TTTTTCTTTTTCTTTTTCTTT	Daucus carota
DCAR_015921	PgGF14-26	191	211	-	6.85e-07	CTTTTTCTTTTTCTTTTTCTT	Daucus carota
DCAR_015921	PgGF14-26	192	212	-	1.17e-08	TCTTTTTCTTTTTCTTTTTCT	Daucus carota
DCAR_015921	PgGF14-26	194	214	-	9.16e-10	TTTCTTTTTCTTTTTCTTTTT	Daucus carota
DCAR_015921	PgGF14-26	195	215	-	4e-06	TTTTCTTTTTCTTTTTCTTTT	Daucus carota
DCAR_015921	PgGF14-26	196	216	-	3.35e-08	CTTTTCTTTTTCTTTTTCTTT	Daucus carota
DCAR_015921	PgGF14-26	197	217	-	6.2e-07	TCTTTTCTTTTTCTTTTTCTT	Daucus carota
DCAR_015921	PgGF14-26	198	218	-	4.83e-08	TTCTTTTCTTTTTCTTTTTCT	Daucus carota
DCAR_015921	PgGF14-26	200	220	-	2.55e-08	TTTTCTTTTCTTTTTCTTTTT	Daucus carota
DCAR_015921	PgGF14-26	201	221	-	2.38e-06	CTTTTCTTTTCTTTTTCTTTT	Daucus carota
DCAR_015921	PgGF14-26	202	222	-	8.24e-08	TCTTTTCTTTTCTTTTTCTTT	Daucus carota
DCAR_015921	PgGF14-26	203	223	-	1.48e-06	TTCTTTTCTTTTCTTTTTCTT	Daucus carota
DCAR_015921	PgGF14-26	207	227	-	5.33e-06	TCTGTTCTTTTCTTTTCTTTT	Daucus carota
DCAR_015921	PgGF14-26	208	228	-	2.55e-06	TTCTGTTCTTTTCTTTTCTTT	Daucus carota
DCAR_015921	PgGF14-26	213	233	-	7.61e-06	TTCTGTTCTGTTCTTTTCTTT	Daucus carota
DCAR_015921	PgGF14-26	223	243	-	8.83e-06	TTTCTGCTTTTTCTGTTCTGT	Daucus carota
DCAR_015921	PgGF14-26	229	249	-	5.52e-06	CTTTACTTTCTGCTTTTTCTG	Daucus carota
DCAR_015921	PgGF14-26	315	335	+	8.43e-08	GTCCTCTCTCTCTCTCTCTCT	Daucus carota
DCAR_015921	PgGF14-26	317	337	+	3.34e-09	CCTCTCTCTCTCTCTCTCTCT	Daucus carota
DCAR_015921	PgGF14-26	319	339	+	1.34e-09	TCTCTCTCTCTCTCTCTCTCT	Daucus carota
DCAR_015921	PgGF14-26	321	341	+	1.34e-09	TCTCTCTCTCTCTCTCTCTCT	Daucus carota
DCAR_015921	PgGF14-26	323	343	+	1.34e-09	TCTCTCTCTCTCTCTCTCTCT	Daucus carota
DCAR_015921	PgGF14-26	325	345	+	5.61e-08	TCTCTCTCTCTCTCTCTCTCA	Daucus carota
DCAR_015921	PgGF14-26	465	485	+	2.55e-06	TTTTCTCTATTCTCTCTCTCT	Daucus carota
DCAR_015921	PgGF14-26	469	489	+	4.69e-07	CTCTATTCTCTCTCTCTCTCT	Daucus carota
DCAR_015921	PgGF14-26	471	491	+	2.62e-06	CTATTCTCTCTCTCTCTCTCT	Daucus carota
DCAR_015921	PgGF14-27	568	588	+	2.19e-06	TGCTTTTCTTTGTTTCTCTCC	Daucus carota
DCAR_015921	PgGF14-27	570	590	+	3.08e-07	CTTTTCTTTGTTTCTCTCCCG	Daucus carota
DCAR_015921	PgGF14-28	530	550	-	6.01e-06	TTCTGTTCTTGCCCTTTTTCT	Daucus carota
DCAR_015921	PgGF14-29	115	135	+	7.83e-07	TTCTTTTCTTTCCTTTTCTTT	Daucus carota
DCAR_015921	PgGF14-29	116	136	+	3.2e-06	TCTTTTCTTTCCTTTTCTTTT	Daucus carota
DCAR_015921	PgGF14-29	117	137	+	2.04e-07	CTTTTCTTTCCTTTTCTTTTT	Daucus carota
DCAR_015921	PgGF14-29	120	140	+	1.24e-06	TTCTTTCCTTTTCTTTTTTTT	Daucus carota
DCAR_015921	PgGF14-29	121	141	+	4.78e-07	TCTTTCCTTTTCTTTTTTTTA	Daucus carota
DCAR_015921	PgGF14-29	122	142	+	9.03e-06	CTTTCCTTTTCTTTTTTTTAT	Daucus carota
DCAR_015921	PgGF14-29	176	196	-	3.85e-06	TTTTCTTTTCTTTTTCTTTAA	Daucus carota
DCAR_015921	PgGF14-29	177	197	-	9.76e-06	CTTTTCTTTTCTTTTTCTTTA	Daucus carota
DCAR_015921	PgGF14-29	178	198	-	8.24e-08	TCTTTTCTTTTCTTTTTCTTT	Daucus carota
DCAR_015921	PgGF14-29	179	199	-	1.48e-06	TTCTTTTCTTTTCTTTTTCTT	Daucus carota
DCAR_015921	PgGF14-29	182	202	-	2.49e-07	CTTTTCTTTTCTTTTCTTTTT	Daucus carota
DCAR_015921	PgGF14-29	183	203	-	4.61e-07	TCTTTTCTTTTCTTTTCTTTT	Daucus carota
DCAR_015921	PgGF14-29	184	204	-	9.81e-07	TTCTTTTCTTTTCTTTTCTTT	Daucus carota
DCAR_015921	PgGF14-29	187	207	-	5.69e-07	CTTTTCTTTTCTTTTCTTTTC	Daucus carota
DCAR_015921	PgGF14-29	188	208	-	4.61e-07	TCTTTTCTTTTCTTTTCTTTT	Daucus carota
DCAR_015921	PgGF14-29	189	209	-	9.81e-07	TTCTTTTCTTTTCTTTTCTTT	Daucus carota
DCAR_015921	PgGF14-29	192	212	-	3.85e-07	TTTTTCTTTTCTTTTCTTTTC	Daucus carota
DCAR_015921	PgGF14-29	193	213	-	5.12e-07	CTTTTTCTTTTCTTTTCTTTT	Daucus carota
DCAR_015921	PgGF14-29	194	214	-	1.57e-06	GCTTTTTCTTTTCTTTTCTTT	Daucus carota
DCAR_015921	PgGF14-29	198	218	-	1.51e-06	TTCTGCTTTTTCTTTTCTTTT	Daucus carota
DCAR_015921	PgGF14-29	199	219	-	7.21e-07	TTTCTGCTTTTTCTTTTCTTT	Daucus carota
DCAR_015921	PgGF14-29	205	225	-	3.38e-06	TTCTGCTTTCTGCTTTTTCTT	Daucus carota
DCAR_015921	PgGF14-29	319	339	+	8.43e-08	GTCCTCTCTCTCTCTCTCTCT	Daucus carota
DCAR_015921	PgGF14-29	321	341	+	3.34e-09	CCTCTCTCTCTCTCTCTCTCT	Daucus carota
DCAR_015921	PgGF14-29	323	343	+	5.61e-08	TCTCTCTCTCTCTCTCTCTCA	Daucus carota
DCAR_015921	PgGF14-39	489	509	-	6.93e-06	GGTTGTCTTTTGTTTTTTTTC	Daucus carota
DCAR_015921	PgGF14-40	526	546	-	6.01e-06	TTCTGTTCTTGCCCTTTTTCT	Daucus carota
DCAR_015921	PgGF14-42	402	422	-	2.59e-07	TTTTTCTCTCTCTTTTTCCCG	Daucus carota
DCAR_015921	PgGF14-42	408	428	-	4.22e-07	GTTCTATTTTTCTCTCTCTTT	Daucus carota
DCAR_015921	PgGF14-5	568	588	+	2.19e-06	TGCTTTTCTTTGTTTCTCTCC	Daucus carota
DCAR_015921	PgGF14-5	570	590	+	3.08e-07	CTTTTCTTTGTTTCTCTCCCG	Daucus carota
DCAR_015921	PgGF14-6	566	586	+	6.85e-06	TCTGCTTTTCTTTGTTTCTCT	Daucus carota
DCAR_015921	PgGF14-6	568	588	+	2.19e-06	TGCTTTTCTTTGTTTCTCTCC	Daucus carota
DCAR_015921	PgGF14-6	570	590	+	3.08e-07	CTTTTCTTTGTTTCTCTCCCG	Daucus carota
DCAR_015921	PgGF14-7	534	554	+	6.99e-08	CCTTTTCCTCTCTCTTTCTCT	Daucus carota
DCAR_015921	PgGF14-7	536	556	+	7.21e-07	TTTTCCTCTCTCTTTCTCTCA	Daucus carota
DCAR_015921	PgGF14-8	534	554	+	3.09e-08	CCTCTTCCTCTCTCTTTCTCT	Daucus carota
DCAR_015921	PgGF14-8	536	556	+	9.35e-07	TCTTCCTCTCTCTTTCTCTCA	Daucus carota
DCAR_016172	PgGF14-11	259	279	-	6.81e-06	AGAAAAAAAAAGGAATATAAA	Daucus carota
DCAR_016172	PgGF14-11	272	292	-	1.82e-06	ATAGAAAAAAAGAAGAAAAAA	Daucus carota
DCAR_016172	PgGF14-21	463	483	+	4.15e-06	GGGGTCAAAAAGAAAAAAAAA	Daucus carota
DCAR_016172	PgGF14-21	473	493	+	1.31e-06	AGAAAAAAAAAGAAAAGAAAG	Daucus carota
DCAR_016172	PgGF14-21	478	498	+	1.72e-06	AAAAAAGAAAAGAAAGAAAAG	Daucus carota
DCAR_016172	PgGF14-26	116	136	-	1.09e-06	AAAAAAAAAAAGAAAGAAAGA	Daucus carota
DCAR_016172	PgGF14-26	176	196	+	2.19e-07	TGAAAGAAAAAGAAAAAGAAA	Daucus carota
DCAR_016172	PgGF14-26	182	202	+	7.02e-09	AAAAAGAAAAAGAAAAAGAAA	Daucus carota
DCAR_016172	PgGF14-26	188	208	+	7.02e-09	AAAAAGAAAAAGAAAAAGAAA	Daucus carota
DCAR_016172	PgGF14-26	194	214	+	7.02e-09	AAAAAGAAAAAGAAAAAGAAA	Daucus carota
DCAR_016172	PgGF14-26	200	220	+	7.96e-08	AAAAAGAAAAAGAAAAGAAAA	Daucus carota
DCAR_016172	PgGF14-26	226	246	+	1.34e-07	GAACAGAAAAAGCAGAAAGTA	Daucus carota
DCAR_016172	PgGF14-28	576	596	-	4.8e-06	GAGAGAAAAAAGTTAGAGAAA	Daucus carota
DCAR_016172	PgGF14-29	118	138	-	6.14e-07	AAAAAAGAAAAGGAAAGAAAA	Daucus carota
DCAR_016172	PgGF14-29	176	196	+	3.86e-06	TTAAAGAAAAAGAAAAGAAAA	Daucus carota
DCAR_016172	PgGF14-29	181	201	+	4.23e-06	GAAAAAGAAAAGAAAAGAAAA	Daucus carota
DCAR_016172	PgGF14-29	186	206	+	4.47e-06	AGAAAAGAAAAGAAAAGAAAA	Daucus carota
DCAR_016172	PgGF14-29	191	211	+	4.47e-06	AGAAAAGAAAAGAAAAGAAAA	Daucus carota
DCAR_016172	PgGF14-29	196	216	+	2.86e-06	AGAAAAGAAAAGAAAAAGCAG	Daucus carota
DCAR_016172	PgGF14-29	202	222	+	1.86e-08	GAAAAGAAAAAGCAGAAAGCA	Daucus carota
DCAR_016172	PgGF14-32	506	526	-	6.47e-06	TGAGTGGAAAAGTAGAAACTA	Daucus carota
DCAR_016172	PgGF14-33	482	502	-	7.17e-06	AGGGCCAAAAAGGTAAAAGAA	Daucus carota
DCAR_016172	PgGF14-35	510	530	-	6.47e-06	TGAGTGGAAAAGTAGAAACTA	Daucus carota
DCAR_016172	PgGF14-40	576	596	-	4.8e-06	GAGAGAAAAAAGTTAGAGAAA	Daucus carota
DCAR_016302	PgGF14-14	113	127	-	7.36e-06	TCTGTTGACTATTCC	Daucus carota
DCAR_017032	PgGF14-31	319	329	-	8.8e-06	ATCCACTTGCG	Daucus carota
DCAR_017032	PgGF14-31	366	376	+	3.45e-06	ACCAACTTGCC	Daucus carota
DCAR_017496	PgGF14-9	195	204	+	8.21e-06	TCCGACAAAA	Daucus carota
DCAR_017498	PgGF14-11	312	332	+	4.9e-06	CTCTCGTTTTTTCTCAGTCAC	Daucus carota
DCAR_017498	PgGF14-11	468	488	+	4.69e-09	CTCTCTCCGCCTCTCTCTCTC	Daucus carota
DCAR_017498	PgGF14-11	470	490	+	1.79e-07	CTCTCCGCCTCTCTCTCTCCT	Daucus carota
DCAR_017498	PgGF14-11	472	492	+	5.74e-07	CTCCGCCTCTCTCTCTCCTCC	Daucus carota
DCAR_017498	PgGF14-11	474	494	+	2.22e-07	CCGCCTCTCTCTCTCCTCCTC	Daucus carota
DCAR_017498	PgGF14-11	476	496	+	1.85e-06	GCCTCTCTCTCTCCTCCTCCC	Daucus carota
DCAR_017498	PgGF14-11	564	584	+	4.28e-07	TCCTATCCCCCTCTCTTTCTC	Daucus carota
DCAR_017498	PgGF14-11	566	586	+	1.02e-07	CTATCCCCCTCTCTTTCTCTT	Daucus carota
DCAR_017498	PgGF14-11	570	590	+	3.3e-06	CCCCCTCTCTTTCTCTTAAAC	Daucus carota
DCAR_017498	PgGF14-11	572	592	+	4.64e-06	CCCTCTCTTTCTCTTAAACAC	Daucus carota
DCAR_017498	PgGF14-13	571	591	+	3.89e-06	TTTTCTTTGTTTCTCTCCCGC	Daucus carota
DCAR_017498	PgGF14-14	517	537	+	1.27e-06	CTCAGCCTCTTTCCCTCTCAC	Daucus carota
DCAR_017498	PgGF14-14	571	591	+	3.89e-06	TTTTCTTTGTTTCTCTCCCGC	Daucus carota
DCAR_017498	PgGF14-17	571	591	+	3.89e-06	TTTTCTTTGTTTCTCTCCCGC	Daucus carota
DCAR_017498	PgGF14-21	103	123	+	7.16e-06	TATGCTCTCCCTCCCCCTCTC	Daucus carota
DCAR_017498	PgGF14-21	107	127	+	1.61e-07	CTCTCCCTCCCCCTCTCTCTC	Daucus carota
DCAR_017498	PgGF14-21	109	129	+	1.85e-08	CTCCCTCCCCCTCTCTCTCCC	Daucus carota
DCAR_017498	PgGF14-21	111	131	+	3.52e-08	CCCTCCCCCTCTCTCTCCCCC	Daucus carota
DCAR_017498	PgGF14-21	113	133	+	8.02e-09	CTCCCCCTCTCTCTCCCCCTC	Daucus carota
DCAR_017498	PgGF14-21	115	135	+	7.77e-08	CCCCCTCTCTCTCCCCCTCCC	Daucus carota
DCAR_017498	PgGF14-21	117	137	+	1.78e-06	CCCTCTCTCTCCCCCTCCCCC	Daucus carota
DCAR_017498	PgGF14-26	179	199	-	7.93e-06	CTTTTTCTTTTTCTTTTTCTT	Daucus carota
DCAR_017498	PgGF14-26	185	205	-	7.93e-06	CTTTTTCTTTTTCTTTTTCTT	Daucus carota
DCAR_017498	PgGF14-26	191	211	-	7.93e-06	CTTTTTCTTTTTCTTTTTCTT	Daucus carota
DCAR_017498	PgGF14-26	310	330	+	7.68e-08	ATCAGGTCCTCTCTCTCTCTC	Daucus carota
DCAR_017498	PgGF14-26	312	332	+	2.01e-08	CAGGTCCTCTCTCTCTCTCTC	Daucus carota
DCAR_017498	PgGF14-26	314	334	+	6.47e-07	GGTCCTCTCTCTCTCTCTCTC	Daucus carota
DCAR_017498	PgGF14-26	316	336	+	2.34e-12	TCCTCTCTCTCTCTCTCTCTC	Daucus carota
DCAR_017498	PgGF14-26	318	338	+	6.18e-14	CTCTCTCTCTCTCTCTCTCTC	Daucus carota
DCAR_017498	PgGF14-26	320	340	+	6.18e-14	CTCTCTCTCTCTCTCTCTCTC	Daucus carota
DCAR_017498	PgGF14-26	322	342	+	6.18e-14	CTCTCTCTCTCTCTCTCTCTC	Daucus carota
DCAR_017498	PgGF14-26	324	344	+	6.18e-14	CTCTCTCTCTCTCTCTCTCTC	Daucus carota
DCAR_017498	PgGF14-26	326	346	+	7.23e-11	CTCTCTCTCTCTCTCTCTCAT	Daucus carota
DCAR_017498	PgGF14-26	328	348	+	1.29e-08	CTCTCTCTCTCTCTCTCATAT	Daucus carota
DCAR_017498	PgGF14-26	330	350	+	2.18e-07	CTCTCTCTCTCTCTCATATTT	Daucus carota
DCAR_017498	PgGF14-26	440	460	+	8.59e-06	TTCTCACGCCCTCTTTCCTTC	Daucus carota
DCAR_017498	PgGF14-26	468	488	+	3.9e-07	TCTCTATTCTCTCTCTCTCTC	Daucus carota
DCAR_017498	PgGF14-26	470	490	+	8.19e-09	TCTATTCTCTCTCTCTCTCTC	Daucus carota
DCAR_017498	PgGF14-26	472	492	+	3.58e-10	TATTCTCTCTCTCTCTCTCTC	Daucus carota
DCAR_017498	PgGF14-26	474	494	+	5.18e-10	TTCTCTCTCTCTCTCTCTCAT	Daucus carota
DCAR_017498	PgGF14-26	476	496	+	1.29e-08	CTCTCTCTCTCTCTCTCATAT	Daucus carota
DCAR_017498	PgGF14-26	478	498	+	2.13e-06	CTCTCTCTCTCTCTCATATAT	Daucus carota
DCAR_017498	PgGF14-27	571	591	+	3.89e-06	TTTTCTTTGTTTCTCTCCCGC	Daucus carota
DCAR_017498	PgGF14-29	314	334	+	7.68e-08	ATCAGGTCCTCTCTCTCTCTC	Daucus carota
DCAR_017498	PgGF14-29	316	336	+	2.01e-08	CAGGTCCTCTCTCTCTCTCTC	Daucus carota
DCAR_017498	PgGF14-29	318	338	+	6.47e-07	GGTCCTCTCTCTCTCTCTCTC	Daucus carota
DCAR_017498	PgGF14-29	320	340	+	2.34e-12	TCCTCTCTCTCTCTCTCTCTC	Daucus carota
DCAR_017498	PgGF14-29	322	342	+	6.18e-14	CTCTCTCTCTCTCTCTCTCTC	Daucus carota
DCAR_017498	PgGF14-29	324	344	+	7.23e-11	CTCTCTCTCTCTCTCTCTCAT	Daucus carota
DCAR_017498	PgGF14-29	326	346	+	1.29e-08	CTCTCTCTCTCTCTCTCATAT	Daucus carota
DCAR_017498	PgGF14-29	328	348	+	2.18e-07	CTCTCTCTCTCTCTCATATTT	Daucus carota
DCAR_017498	PgGF14-29	438	458	+	8.59e-06	TTCTCACGCCCTCTTTCCTTC	Daucus carota
DCAR_017498	PgGF14-37	465	485	+	7.42e-06	CTCTCTCCGCCTATATCTATC	Daucus carota
DCAR_017498	PgGF14-39	554	574	+	7.46e-06	CTCTTTTTCTTTCCATACCTT	Daucus carota
DCAR_017498	PgGF14-40	567	587	+	1.19e-07	TTCTCTTTCTTTCTCTAACTT	Daucus carota
DCAR_017498	PgGF14-40	569	589	+	5.35e-07	CTCTTTCTTTCTCTAACTTTT	Daucus carota
DCAR_017498	PgGF14-41	571	591	+	2.43e-06	CCCTAATTCCCTCTCTCACGC	Daucus carota
DCAR_017498	PgGF14-42	403	423	-	1.7e-06	ATTTTTCTCTCTCTTTTTCCC	Daucus carota
DCAR_017498	PgGF14-42	405	425	-	7.19e-08	CTATTTTTCTCTCTCTTTTTC	Daucus carota
DCAR_017498	PgGF14-42	407	427	-	2.11e-07	TTCTATTTTTCTCTCTCTTTT	Daucus carota
DCAR_017498	PgGF14-5	571	591	+	3.89e-06	TTTTCTTTGTTTCTCTCCCGC	Daucus carota
DCAR_017498	PgGF14-6	571	591	+	3.89e-06	TTTTCTTTGTTTCTCTCCCGC	Daucus carota
DCAR_017498	PgGF14-7	531	551	+	2.83e-07	CCCCCTTTTCCTCTCTCTTTC	Daucus carota
DCAR_017498	PgGF14-7	533	553	+	1.68e-08	CCCTTTTCCTCTCTCTTTCTC	Daucus carota
DCAR_017498	PgGF14-7	535	555	+	2.57e-08	CTTTTCCTCTCTCTTTCTCTC	Daucus carota
DCAR_017498	PgGF14-7	537	557	+	3.03e-06	TTTCCTCTCTCTTTCTCTCAC	Daucus carota
DCAR_017498	PgGF14-7	539	559	+	2.55e-09	TCCTCTCTCTTTCTCTCACTA	Daucus carota
DCAR_017498	PgGF14-7	541	561	+	1.61e-07	CTCTCTCTTTCTCTCACTAAA	Daucus carota
DCAR_017498	PgGF14-7	545	565	+	5.25e-06	CTCTTTCTCTCACTAAAATTC	Daucus carota
DCAR_017498	PgGF14-7	560	580	+	3.27e-06	AAATTCCTGTTTCTCTCTCTA	Daucus carota
DCAR_017498	PgGF14-7	566	586	+	3.12e-06	CTGTTTCTCTCTCTAAAAATC	Daucus carota
DCAR_017498	PgGF14-8	531	551	+	1.52e-06	ACACCTCTTCCTCTCTCTTTC	Daucus carota
DCAR_017498	PgGF14-8	533	553	+	1.77e-08	ACCTCTTCCTCTCTCTTTCTC	Daucus carota
DCAR_017498	PgGF14-8	535	555	+	1.05e-09	CTCTTCCTCTCTCTTTCTCTC	Daucus carota
DCAR_017498	PgGF14-8	537	557	+	9.64e-07	CTTCCTCTCTCTTTCTCTCAC	Daucus carota
DCAR_017498	PgGF14-8	539	559	+	2.55e-09	TCCTCTCTCTTTCTCTCACTA	Daucus carota
DCAR_017498	PgGF14-8	541	561	+	1.61e-07	CTCTCTCTTTCTCTCACTAAA	Daucus carota
DCAR_017498	PgGF14-8	545	565	+	5.25e-06	CTCTTTCTCTCACTAAAATTC	Daucus carota
DCAR_017498	PgGF14-8	560	580	+	3.27e-06	AAATTCCTGTTTCTCTCTCTA	Daucus carota
DCAR_017498	PgGF14-8	566	586	+	3.12e-06	CTGTTTCTCTCTCTAAAAATC	Daucus carota
DCAR_017506	PgGF14-27	50	64	-	1.08e-06	TACCAAATAAGGAAA	Daucus carota
DCAR_017600	PgGF14-20	364	378	-	7.42e-06	ACTAATTAGGTAAAA	Daucus carota
DCAR_017600	PgGF14-21	359	373	-	7.42e-06	ACTAATTAGGTAAAA	Daucus carota
DCAR_017600	PgGF14-35	546	560	+	7.42e-06	AAGTAGTAGGTGAAG	Daucus carota
DCAR_019072	PgGF14-33	529	539	-	7.43e-06	TAGTGAAGTAG	Daucus carota
DCAR_019342	PgGF14-11	459	478	+	1.33e-06	TTCTCTCTCCTCTCTCCGCC	Daucus carota
DCAR_019342	PgGF14-11	461	480	+	8.25e-06	CTCTCTCCTCTCTCCGCCTC	Daucus carota
DCAR_019342	PgGF14-11	464	483	+	5.11e-07	TCTCCTCTCTCCGCCTCTCT	Daucus carota
DCAR_019342	PgGF14-11	466	485	+	1.48e-07	TCCTCTCTCCGCCTCTCTCT	Daucus carota
DCAR_019342	PgGF14-11	468	487	+	4.3e-08	CTCTCTCCGCCTCTCTCTCT	Daucus carota
DCAR_019342	PgGF14-11	470	489	+	9.55e-09	CTCTCCGCCTCTCTCTCTCC	Daucus carota
DCAR_019342	PgGF14-11	472	491	+	5.56e-06	CTCCGCCTCTCTCTCTCCTC	Daucus carota
DCAR_019342	PgGF14-11	476	495	+	1.11e-07	GCCTCTCTCTCTCCTCCTCC	Daucus carota
DCAR_019342	PgGF14-21	103	122	+	7.63e-07	TATGCTCTCCCTCCCCCTCT	Daucus carota
DCAR_019342	PgGF14-21	105	124	+	1.05e-07	TGCTCTCCCTCCCCCTCTCT	Daucus carota
DCAR_019342	PgGF14-21	107	126	+	4.03e-09	CTCTCCCTCCCCCTCTCTCT	Daucus carota
DCAR_019342	PgGF14-21	109	128	+	1.46e-09	CTCCCTCCCCCTCTCTCTCC	Daucus carota
DCAR_019342	PgGF14-21	111	130	+	2.25e-08	CCCTCCCCCTCTCTCTCCCC	Daucus carota
DCAR_019342	PgGF14-21	113	132	+	2.04e-07	CTCCCCCTCTCTCTCCCCCT	Daucus carota
DCAR_019342	PgGF14-21	115	134	+	6.15e-10	CCCCCTCTCTCTCCCCCTCC	Daucus carota
DCAR_019342	PgGF14-21	117	136	+	5.66e-09	CCCTCTCTCTCCCCCTCCCC	Daucus carota
DCAR_019342	PgGF14-22	442	461	+	2.71e-06	CTCTCGCCCTTTCCTTCCGT	Daucus carota
DCAR_019342	PgGF14-22	444	463	+	1.07e-06	CTCGCCCTTTCCTTCCGTGC	Daucus carota
DCAR_019342	PgGF14-26	312	331	+	8.83e-06	CAGGTCCTCTCTCTCTCTCT	Daucus carota
DCAR_019342	PgGF14-26	314	333	+	8.44e-06	GGTCCTCTCTCTCTCTCTCT	Daucus carota
DCAR_019342	PgGF14-26	316	335	+	3.78e-07	TCCTCTCTCTCTCTCTCTCT	Daucus carota
DCAR_019342	PgGF14-26	318	337	+	8.43e-08	CTCTCTCTCTCTCTCTCTCT	Daucus carota
DCAR_019342	PgGF14-26	320	339	+	8.43e-08	CTCTCTCTCTCTCTCTCTCT	Daucus carota
DCAR_019342	PgGF14-26	322	341	+	8.43e-08	CTCTCTCTCTCTCTCTCTCT	Daucus carota
DCAR_019342	PgGF14-26	324	343	+	8.43e-08	CTCTCTCTCTCTCTCTCTCT	Daucus carota
DCAR_019342	PgGF14-27	453	472	+	5.18e-06	TTGCCCTGGCCCGCTCCCGT	Daucus carota
DCAR_019342	PgGF14-27	522	541	+	3.44e-06	CCCTCTTGCCCTCTTGCCTC	Daucus carota
DCAR_019342	PgGF14-29	316	335	+	8.83e-06	CAGGTCCTCTCTCTCTCTCT	Daucus carota
DCAR_019342	PgGF14-29	318	337	+	8.44e-06	GGTCCTCTCTCTCTCTCTCT	Daucus carota
DCAR_019342	PgGF14-29	320	339	+	3.78e-07	TCCTCTCTCTCTCTCTCTCT	Daucus carota
DCAR_019342	PgGF14-29	322	341	+	8.43e-08	CTCTCTCTCTCTCTCTCTCT	Daucus carota
DCAR_019342	PgGF14-37	456	475	+	1.33e-06	TTCTCTCTCCTCTCTCCGCC	Daucus carota
DCAR_019342	PgGF14-5	522	541	+	3.44e-06	CCCTCTTGCCCTCTTGCCTC	Daucus carota
DCAR_019342	PgGF14-7	531	550	+	4.86e-06	CCCCCTTTTCCTCTCTCTTT	Daucus carota
DCAR_019342	PgGF14-8	535	554	+	3.71e-06	CTCTTCCTCTCTCTTTCTCT	Daucus carota
DCAR_019421	PgGF14-4	479	489	+	3.46e-06	CAAAGTCAACC	Daucus carota
DCAR_019422	PgGF14-4	479	489	+	3.46e-06	CAAAGTCAACC	Daucus carota
DCAR_019435	PgGF14-15	207	215	+	1.06e-06	CCCACGTGG	Daucus carota
DCAR_019435	PgGF14-15	462	470	-	4.61e-06	GCCACGTGG	Daucus carota
DCAR_019444	PgGF14-19	3	17	-	7.06e-06	AGAAGGATCAAGAAT	Daucus carota
DCAR_019444	PgGF14-40	192	206	+	8.65e-06	AGAATTTTCTAGATA	Daucus carota
DCAR_019806	PgGF14-27	1	11	-	2.21e-06	GCAAGCTGTCA	Daucus carota
DCAR_020616	PgGF14-15	457	471	+	9.23e-06	CTTCTCCACGTGGCA	Daucus carota
DCAR_020616	PgGF14-31	301	315	+	2.5e-06	GTTTTTCACGTGGCA	Daucus carota
DCAR_020697	PgGF14-31	487	497	-	8.13e-06	CAAAAAGGTAA	Daucus carota
DCAR_020697	PgGF14-33	487	497	-	8.13e-06	CAAAAAGGTAA	Daucus carota
DCAR_020697	PgGF14-37	515	525	-	2.25e-06	GAAAAAGTGAA	Daucus carota
DCAR_020697	PgGF14-39	427	437	+	3.59e-07	CAAAAAGGGAA	Daucus carota
DCAR_020809	PgGF14-20	365	379	-	7.1e-06	AACTAATTAGGTAAA	Daucus carota
DCAR_020809	PgGF14-21	360	374	-	7.1e-06	AACTAATTAGGTAAA	Daucus carota
DCAR_020870	PgGF14-34	495	506	+	9.76e-06	AGATATTTTGTC	Daucus carota
DCAR_021266	PgGF14-6	9	23	-	8.27e-06	CTTCAATTTCAAGCC	Daucus carota
DCAR_021667	PgGF14-10	138	152	-	4.22e-07	CACAAAAAAAAAACA	Daucus carota
DCAR_021667	PgGF14-20	248	262	+	1.92e-06	AACAAAAAAAAATAG	Daucus carota
DCAR_021667	PgGF14-20	478	492	+	6.31e-07	AAAAGAAAAAAAAAA	Daucus carota
DCAR_021667	PgGF14-20	479	493	+	1.2e-06	AAAGAAAAAAAAAAA	Daucus carota
DCAR_021667	PgGF14-20	480	494	+	5.83e-07	AAGAAAAAAAAAAAA	Daucus carota
DCAR_021667	PgGF14-20	481	495	+	3.93e-06	AGAAAAAAAAAAAAG	Daucus carota
DCAR_021667	PgGF14-20	482	496	+	2.79e-06	GAAAAAAAAAAAAGG	Daucus carota
DCAR_021667	PgGF14-21	218	232	+	1.03e-06	GTCAAAAAAAAAAAA	Daucus carota
DCAR_021667	PgGF14-21	470	484	+	2.21e-06	AAAAGAAAAAAAAAG	Daucus carota
DCAR_021667	PgGF14-21	471	485	+	6.19e-06	AAAGAAAAAAAAAGA	Daucus carota
DCAR_021667	PgGF14-21	472	486	+	6.84e-06	AAGAAAAAAAAAGAA	Daucus carota
DCAR_021667	PgGF14-26	122	136	-	2.78e-06	AAAAAAAAAAAGAAA	Daucus carota
DCAR_021667	PgGF14-26	123	137	-	2.35e-06	AAAAAAAAAAAAGAA	Daucus carota
DCAR_021667	PgGF14-26	124	138	-	1.07e-06	AAAAAAAAAAAAAGA	Daucus carota
DCAR_021667	PgGF14-26	125	139	-	5.39e-07	AAAAAAAAAAAAAAG	Daucus carota
DCAR_021667	PgGF14-26	126	140	-	1.35e-07	AAAAAAAAAAAAAAA	Daucus carota
DCAR_021667	PgGF14-26	128	142	-	2.29e-06	ATAAAAAAAAAAAAA	Daucus carota
DCAR_021667	PgGF14-30	131	145	-	7.65e-06	ACAAAAAAAAAAACT	Daucus carota
DCAR_021667	PgGF14-30	132	146	-	5.13e-07	GACAAAAAAAAAAAC	Daucus carota
DCAR_021667	PgGF14-36	497	511	+	3.93e-06	GAAAAAAACAAAACA	Daucus carota
DCAR_021667	PgGF14-41	403	417	-	1.2e-06	CACAAAAAAAAATAA	Daucus carota
DCAR_022480	PgGF14-16	86	102	-	2.28e-06	CTTGGCCACCAAGTAAA	Daucus carota
DCAR_022972	PgGF14-31	586	600	+	1.24e-07	GCAACAGCAGCAGCC	Daucus carota
DCAR_022972	PgGF14-33	586	600	+	1.24e-07	GCAACAGCAGCAGCC	Daucus carota
DCAR_023095	PgGF14-38	182	192	-	9.66e-06	GGCTCAGGGCT	Daucus carota
DCAR_023154	PgGF14-33	484	497	-	2.65e-06	CAAAAAGGTAAAAG	Daucus carota
DCAR_023154	PgGF14-39	427	440	+	3.53e-08	CAAAAAGGGAAAAA	Daucus carota
DCAR_023184	PgGF14-25	252	266	+	3.64e-06	TACAACCTTATCTTA	Daucus carota
DCAR_023184	PgGF14-27	63	77	-	8.43e-06	GATCTCCTTATCCTA	Daucus carota
DCAR_023275	PgGF14-9	179	188	-	1.42e-06	CCGTACGACG	Daucus carota
DCAR_023690	PgGF14-33	328	357	+	5.89e-06	TATGGGCCCCTCTTATTTAAATAGAAACTT	Daucus carota
DCAR_023690	PgGF14-41	442	471	-	4.68e-06	CGTGGGTCCCTTTCTACCATATTAATCATT	Daucus carota
DCAR_023690	PgGF14-42	444	473	-	4.68e-06	CGTGGGTCCCTTTCTACCATATTAATCATT	Daucus carota
DCAR_023899	PgGF14-11	267	286	-	6.91e-07	AAAAAGAAGAAAAAAAAAGG	Daucus carota
DCAR_023899	PgGF14-11	268	287	-	3.34e-07	AAAAAAGAAGAAAAAAAAAG	Daucus carota
DCAR_023899	PgGF14-11	269	288	-	9.33e-06	AAAAAAAGAAGAAAAAAAAA	Daucus carota
DCAR_023899	PgGF14-11	270	289	-	3.12e-07	GAAAAAAAGAAGAAAAAAAA	Daucus carota
DCAR_023899	PgGF14-11	271	290	-	7e-07	AGAAAAAAAGAAGAAAAAAA	Daucus carota
DCAR_023899	PgGF14-11	272	291	-	5.42e-06	TAGAAAAAAAGAAGAAAAAA	Daucus carota
DCAR_023899	PgGF14-11	273	292	-	2.37e-06	ATAGAAAAAAAGAAGAAAAA	Daucus carota
DCAR_023899	PgGF14-11	454	473	-	6.36e-06	AGAGAGGAGAGAGAAAGTGG	Daucus carota
DCAR_023899	PgGF14-11	467	486	-	6.6e-06	GAGAGAGAGGCGGAGAGAGG	Daucus carota
DCAR_023899	PgGF14-11	515	534	-	4.46e-06	GAAGAAGAAGAGACGAGTGA	Daucus carota
DCAR_023899	PgGF14-11	565	584	-	4.6e-06	GAGAAAGAGAGGGGGATAGG	Daucus carota
DCAR_023899	PgGF14-14	522	541	-	9.49e-06	AGAGGTGAGAGGGAAAGAGG	Daucus carota
DCAR_023899	PgGF14-16	522	541	-	3.34e-06	AGAGACAAAAGGGCAAGAGG	Daucus carota
DCAR_023899	PgGF14-20	476	495	+	1.24e-06	CAAAAAGAAAAAAAAAAAAG	Daucus carota
DCAR_023899	PgGF14-20	477	496	+	9.84e-07	AAAAAGAAAAAAAAAAAAGG	Daucus carota
DCAR_023899	PgGF14-21	468	487	+	1.16e-07	CAAAAAGAAAAAAAAAGAAA	Daucus carota
DCAR_023899	PgGF14-21	470	489	+	4.43e-07	AAAAGAAAAAAAAAGAAAAG	Daucus carota
DCAR_023899	PgGF14-21	471	490	+	1.5e-06	AAAGAAAAAAAAAGAAAAGA	Daucus carota
DCAR_023899	PgGF14-21	473	492	+	3.84e-08	AGAAAAAAAAAGAAAAGAAA	Daucus carota
DCAR_023899	PgGF14-21	475	494	+	7.94e-08	AAAAAAAAAGAAAAGAAAGA	Daucus carota
DCAR_023899	PgGF14-21	477	496	+	1.6e-06	AAAAAAAGAAAAGAAAGAAA	Daucus carota
DCAR_023899	PgGF14-21	479	498	+	5.45e-07	AAAAAGAAAAGAAAGAAAAG	Daucus carota
DCAR_023899	PgGF14-22	441	460	-	4.17e-06	CGGAAGGAAAGGGCGAGAGA	Daucus carota
DCAR_023899	PgGF14-23	350	369	-	3.66e-06	ATGGCAAAAAAGAAAAGAAA	Daucus carota
DCAR_023899	PgGF14-26	114	133	-	8.37e-09	AAAAAAAAGAAAGAAAGAAG	Daucus carota
DCAR_023899	PgGF14-26	116	135	-	5.51e-08	AAAAAAAAAAGAAAGAAAGA	Daucus carota
DCAR_023899	PgGF14-26	118	137	-	9.51e-09	AAAAAAAAAAAAGAAAGAAA	Daucus carota
DCAR_023899	PgGF14-26	120	139	-	2.92e-08	AAAAAAAAAAAAAAGAAAGA	Daucus carota
DCAR_023899	PgGF14-26	122	141	-	7.31e-08	TAAAAAAAAAAAAAAAGAAA	Daucus carota
DCAR_023899	PgGF14-26	124	143	-	1.32e-06	TATAAAAAAAAAAAAAAAGA	Daucus carota
DCAR_023899	PgGF14-26	175	194	+	2.95e-06	ATGAAAGAAAAAGAAAAAGA	Daucus carota
DCAR_023899	PgGF14-26	177	196	+	4.85e-07	GAAAGAAAAAGAAAAAGAAA	Daucus carota
DCAR_023899	PgGF14-26	179	198	+	1.28e-08	AAGAAAAAGAAAAAGAAAAA	Daucus carota
DCAR_023899	PgGF14-26	181	200	+	3.08e-07	GAAAAAGAAAAAGAAAAAGA	Daucus carota
DCAR_023899	PgGF14-26	183	202	+	2.03e-07	AAAAGAAAAAGAAAAAGAAA	Daucus carota
DCAR_023899	PgGF14-26	185	204	+	1.28e-08	AAGAAAAAGAAAAAGAAAAA	Daucus carota
DCAR_023899	PgGF14-26	187	206	+	3.08e-07	GAAAAAGAAAAAGAAAAAGA	Daucus carota
DCAR_023899	PgGF14-26	189	208	+	2.03e-07	AAAAGAAAAAGAAAAAGAAA	Daucus carota
DCAR_023899	PgGF14-26	191	210	+	1.28e-08	AAGAAAAAGAAAAAGAAAAA	Daucus carota
DCAR_023899	PgGF14-26	193	212	+	3.08e-07	GAAAAAGAAAAAGAAAAAGA	Daucus carota
DCAR_023899	PgGF14-26	195	214	+	2.03e-07	AAAAGAAAAAGAAAAAGAAA	Daucus carota
DCAR_023899	PgGF14-26	197	216	+	2.05e-08	AAGAAAAAGAAAAAGAAAAG	Daucus carota
DCAR_023899	PgGF14-26	200	219	+	1.36e-07	AAAAAGAAAAAGAAAAGAAA	Daucus carota
DCAR_023899	PgGF14-26	202	221	+	1.6e-07	AAAGAAAAAGAAAAGAAAAG	Daucus carota
DCAR_023899	PgGF14-26	203	222	+	7.09e-07	AAGAAAAAGAAAAGAAAAGA	Daucus carota
DCAR_023899	PgGF14-26	205	224	+	4.29e-06	GAAAAAGAAAAGAAAAGAAC	Daucus carota
DCAR_023899	PgGF14-26	208	227	+	1.23e-06	AAAGAAAAGAAAAGAACAGA	Daucus carota
DCAR_023899	PgGF14-26	317	336	-	1.07e-07	GAGAGAGAGAGAGAGAGAGG	Daucus carota
DCAR_023899	PgGF14-26	319	338	-	7.44e-08	GAGAGAGAGAGAGAGAGAGA	Daucus carota
DCAR_023899	PgGF14-26	321	340	-	7.44e-08	GAGAGAGAGAGAGAGAGAGA	Daucus carota
DCAR_023899	PgGF14-26	323	342	-	7.44e-08	GAGAGAGAGAGAGAGAGAGA	Daucus carota
DCAR_023899	PgGF14-26	325	344	-	7.44e-08	GAGAGAGAGAGAGAGAGAGA	Daucus carota
DCAR_023899	PgGF14-26	327	346	-	1.22e-06	ATGAGAGAGAGAGAGAGAGA	Daucus carota
DCAR_023899	PgGF14-26	333	352	-	4.51e-06	TAAAATATGAGAGAGAGAGA	Daucus carota
DCAR_023899	PgGF14-26	473	492	-	3.89e-06	GAGAGAGAGAGAGAGAGAAT	Daucus carota
DCAR_023899	PgGF14-26	475	494	-	1.22e-06	ATGAGAGAGAGAGAGAGAGA	Daucus carota
DCAR_023899	PgGF14-29	109	128	-	1.89e-06	AGGAAAGAAAAGAAGTGAAG	Daucus carota
DCAR_023899	PgGF14-29	114	133	-	3.73e-06	AGAAAAGGAAAGAAAAGAAG	Daucus carota
DCAR_023899	PgGF14-29	116	135	-	2.06e-06	AAAGAAAAGGAAAGAAAAGA	Daucus carota
DCAR_023899	PgGF14-29	117	136	-	1.4e-06	AAAAGAAAAGGAAAGAAAAG	Daucus carota
DCAR_023899	PgGF14-29	119	138	-	1.35e-08	AAAAAAGAAAAGGAAAGAAA	Daucus carota
DCAR_023899	PgGF14-29	121	140	-	2.75e-07	AAAAAAAAGAAAAGGAAAGA	Daucus carota
DCAR_023899	PgGF14-29	178	197	+	1.6e-07	AAAGAAAAAGAAAAGAAAAG	Daucus carota
DCAR_023899	PgGF14-29	179	198	+	7.09e-07	AAGAAAAAGAAAAGAAAAGA	Daucus carota
DCAR_023899	PgGF14-29	181	200	+	3.58e-08	GAAAAAGAAAAGAAAAGAAA	Daucus carota
DCAR_023899	PgGF14-29	183	202	+	9.16e-07	AAAAGAAAAGAAAAGAAAAG	Daucus carota
DCAR_023899	PgGF14-29	184	203	+	1.07e-06	AAAGAAAAGAAAAGAAAAGA	Daucus carota
DCAR_023899	PgGF14-29	186	205	+	3.04e-08	AGAAAAGAAAAGAAAAGAAA	Daucus carota
DCAR_023899	PgGF14-29	188	207	+	9.16e-07	AAAAGAAAAGAAAAGAAAAG	Daucus carota
DCAR_023899	PgGF14-29	189	208	+	1.07e-06	AAAGAAAAGAAAAGAAAAGA	Daucus carota
DCAR_023899	PgGF14-29	191	210	+	3.04e-08	AGAAAAGAAAAGAAAAGAAA	Daucus carota
DCAR_023899	PgGF14-29	193	212	+	6.91e-07	AAAAGAAAAGAAAAGAAAAA	Daucus carota
DCAR_023899	PgGF14-29	194	213	+	1.41e-06	AAAGAAAAGAAAAGAAAAAG	Daucus carota
DCAR_023899	PgGF14-29	321	340	-	1.07e-07	GAGAGAGAGAGAGAGAGAGG	Daucus carota
DCAR_023899	PgGF14-29	323	342	-	7.44e-08	GAGAGAGAGAGAGAGAGAGA	Daucus carota
DCAR_023899	PgGF14-29	325	344	-	1.22e-06	ATGAGAGAGAGAGAGAGAGA	Daucus carota
DCAR_023899	PgGF14-29	331	350	-	7.51e-06	TGAAATATGAGAGAGAGAGA	Daucus carota
DCAR_023899	PgGF14-32	476	495	-	6.01e-06	TGAGAAATGGGAAAGAAAGA	Daucus carota
DCAR_023899	PgGF14-35	480	499	-	6.01e-06	TGAGAAATGGGAAAGAAAGA	Daucus carota
DCAR_023899	PgGF14-36	457	476	-	8.76e-06	AAAAAAATAAAAAATAAAAG	Daucus carota
DCAR_023899	PgGF14-37	451	470	-	6.36e-06	AGAGAGGAGAGAGAAAGTGG	Daucus carota
DCAR_023899	PgGF14-40	566	585	-	7.31e-06	GTTAGAGAAAGAAAGAGAAG	Daucus carota
DCAR_023899	PgGF14-41	124	143	+	2.55e-06	TAAACGGAAAAGAAAAGAAA	Daucus carota
DCAR_023899	PgGF14-42	401	420	+	6.42e-06	TCGGGAAAAAGAGAGAGAAA	Daucus carota
DCAR_023899	PgGF14-42	403	422	+	2.22e-07	GGGAAAAAGAGAGAGAAAAA	Daucus carota
DCAR_023899	PgGF14-42	407	426	+	2.83e-06	AAAAGAGAGAGAAAAATAGA	Daucus carota
DCAR_023899	PgGF14-7	534	553	-	2.83e-06	GAGAAAGAGAGAGGAAAAGG	Daucus carota
DCAR_023899	PgGF14-8	534	553	-	4.73e-07	GAGAAAGAGAGAGGAAGAGG	Daucus carota
DCAR_023944	PgGF14-7	446	456	+	5.69e-06	AACAGCTGTCT	Daucus carota
DCAR_023944	PgGF14-8	446	456	-	4.32e-06	GACAGCTGTAA	Daucus carota
DCAR_023944	PgGF14-8	447	457	+	3.04e-06	TACAGCTGTCT	Daucus carota
DCAR_024178	PgGF14-19	35	49	+	2.43e-07	ATTTCAAAATTTAAA	Daucus carota
DCAR_024178	PgGF14-22	174	188	+	8.93e-07	AAATTAAAATTTAAA	Daucus carota
DCAR_024178	PgGF14-37	119	133	-	3.43e-07	ATTTTGAAATTTAAA	Daucus carota
DCAR_024178	PgGF14-37	27	41	+	3.15e-06	ATTTTTAAATTCAAA	Daucus carota
DCAR_024178	PgGF14-41	356	370	-	3.45e-06	AATAAAAAATTTAAA	Daucus carota
DCAR_024657	PgGF14-41	462	471	+	2.75e-06	GGGACCCACG	Daucus carota
DCAR_024657	PgGF14-42	464	473	+	2.75e-06	GGGACCCACG	Daucus carota
DCAR_024663	PgGF14-4	479	491	+	9.42e-06	CAAAGTCAACCTA	Daucus carota
DCAR_025094	PgGF14-31	306	313	-	8.65e-06	CCACGTGA	Daucus carota
DCAR_025437	PgGF14-33	327	339	-	5.72e-06	GAGGGGCCCATAT	Daucus carota
DCAR_025451	PgGF14-31	345	358	+	8.61e-06	ACGGTTAGGTATGG	Daucus carota
DCAR_025687	PgGF14-11	266	286	+	4.5e-08	TCCTTTTTTTTTCTTCTTTTT	Daucus carota
DCAR_025687	PgGF14-19	286	306	-	6.19e-06	ACCCCTCCCTTATTTCTTTTT	Daucus carota
DCAR_025687	PgGF14-20	477	497	-	1.16e-07	ACCTTTTTTTTTTTTCTTTTT	Daucus carota
DCAR_025687	PgGF14-21	469	489	-	2.55e-07	CTTTTCTTTTTTTTTCTTTTT	Daucus carota
DCAR_025687	PgGF14-21	479	499	-	6.08e-07	CCTTTTCTTTCTTTTCTTTTT	Daucus carota
DCAR_025687	PgGF14-26	182	202	-	3.64e-08	TTTCTTTTTCTTTTTCTTTTT	Daucus carota
DCAR_025687	PgGF14-26	188	208	-	3.64e-08	TTTCTTTTTCTTTTTCTTTTT	Daucus carota
DCAR_025687	PgGF14-26	194	214	-	3.64e-08	TTTCTTTTTCTTTTTCTTTTT	Daucus carota
DCAR_025687	PgGF14-26	200	220	-	1.6e-07	TTTTCTTTTCTTTTTCTTTTT	Daucus carota
DCAR_025687	PgGF14-26	206	226	-	5.29e-06	CTGTTCTTTTCTTTTCTTTTT	Daucus carota
DCAR_025687	PgGF14-26	232	252	-	6.67e-08	TTTCTTTACTTTCTGCTTTTT	Daucus carota
DCAR_025687	PgGF14-28	570	590	+	8.15e-07	CTTCTCTTTCTCTAACTTTTT	Daucus carota
DCAR_025687	PgGF14-29	112	132	+	1.55e-06	CACTTCTTTTCTTTCCTTTTC	Daucus carota
DCAR_025687	PgGF14-29	117	137	+	2.99e-06	CTTTTCTTTCCTTTTCTTTTT	Daucus carota
DCAR_025687	PgGF14-29	182	202	-	2.14e-06	CTTTTCTTTTCTTTTCTTTTT	Daucus carota
DCAR_025687	PgGF14-29	187	207	-	5.38e-06	CTTTTCTTTTCTTTTCTTTTC	Daucus carota
DCAR_025687	PgGF14-29	192	212	-	5.88e-06	TTTTTCTTTTCTTTTCTTTTC	Daucus carota
DCAR_025687	PgGF14-29	197	217	-	8.86e-06	TCTGCTTTTTCTTTTCTTTTC	Daucus carota
DCAR_025687	PgGF14-29	202	222	-	2.99e-06	TGCTTTCTGCTTTTTCTTTTC	Daucus carota
DCAR_025687	PgGF14-29	208	228	-	7.97e-07	GCTTTCTGCTTTCTGCTTTTT	Daucus carota
DCAR_025687	PgGF14-29	236	256	-	3.1e-06	TTTCTTTGCTTTCTGCTTTCT	Daucus carota
DCAR_025687	PgGF14-32	500	520	+	9.16e-06	TCTTTCTAGTTTCTACTTTTC	Daucus carota
DCAR_025687	PgGF14-33	476	496	+	4.04e-06	CATTTATTCTTTTACCTTTTT	Daucus carota
DCAR_025687	PgGF14-35	504	524	+	9.16e-06	TCTTTCTAGTTTCTACTTTTC	Daucus carota
DCAR_025687	PgGF14-40	570	590	+	1.69e-06	TCTTTCTTTCTCTAACTTTTT	Daucus carota
DCAR_025687	PgGF14-42	406	426	-	7.88e-06	TCTATTTTTCTCTCTCTTTTT	Daucus carota
DCAR_025760	PgGF14-2	432	442	-	4.66e-06	TAACCGTCAAA	Daucus carota
DCAR_025934	PgGF14-15	462	471	+	7.01e-07	CCACGTGGCA	Daucus carota
DCAR_025934	PgGF14-31	306	315	+	1.87e-06	TCACGTGGCA	Daucus carota
DCAR_026137	PgGF14-11	262	282	-	4.58e-06	AGAAGAAAAAAAAAGGAATAT	Daucus carota
DCAR_026137	PgGF14-21	460	480	+	9.3e-06	AGGGGGGTCAAAAAGAAAAAA	Daucus carota
DCAR_026137	PgGF14-21	470	490	+	7.41e-07	AAAAGAAAAAAAAAGAAAAGA	Daucus carota
DCAR_026137	PgGF14-25	373	393	+	5.53e-06	GAACGGACAAAAAAGGAAAAT	Daucus carota
DCAR_026137	PgGF14-26	119	139	-	1.55e-06	AAAAAAAAAAAAAAGAAAGAA	Daucus carota
DCAR_026137	PgGF14-26	179	199	+	6.42e-08	AAGAAAAAGAAAAAGAAAAAG	Daucus carota
DCAR_026137	PgGF14-26	185	205	+	6.42e-08	AAGAAAAAGAAAAAGAAAAAG	Daucus carota
DCAR_026137	PgGF14-26	191	211	+	6.42e-08	AAGAAAAAGAAAAAGAAAAAG	Daucus carota
DCAR_026137	PgGF14-26	197	217	+	7.99e-08	AAGAAAAAGAAAAAGAAAAGA	Daucus carota
DCAR_026137	PgGF14-26	202	222	+	4.66e-06	AAAGAAAAAGAAAAGAAAAGA	Daucus carota
DCAR_026137	PgGF14-26	223	243	+	8.24e-07	ACAGAACAGAAAAAGCAGAAA	Daucus carota
DCAR_026137	PgGF14-28	579	599	-	3.72e-06	GAAGAGAGAAAAAAGTTAGAG	Daucus carota
DCAR_026137	PgGF14-29	121	141	-	2.59e-06	TAAAAAAAAGAAAAGGAAAGA	Daucus carota
DCAR_026137	PgGF14-29	178	198	+	4.66e-06	AAAGAAAAAGAAAAGAAAAGA	Daucus carota
DCAR_026137	PgGF14-29	183	203	+	5.81e-06	AAAAGAAAAGAAAAGAAAAGA	Daucus carota
DCAR_026137	PgGF14-29	188	208	+	5.81e-06	AAAAGAAAAGAAAAGAAAAGA	Daucus carota
DCAR_026137	PgGF14-29	193	213	+	5.08e-06	AAAAGAAAAGAAAAGAAAAAG	Daucus carota
DCAR_026137	PgGF14-29	199	219	+	6.58e-09	AAAGAAAAGAAAAAGCAGAAA	Daucus carota
DCAR_026137	PgGF14-31	485	505	-	3.17e-06	AGAAGGGCCAAAAAGGTAAGA	Daucus carota
DCAR_026137	PgGF14-33	485	505	-	1.12e-06	AGAAGGGCCAAAAAGGTAAAA	Daucus carota
DCAR_026137	PgGF14-40	579	599	-	3.72e-06	GAAGAGAGAAAAAAGTTAGAG	Daucus carota
DCAR_026357	PgGF14-9	179	189	-	5.95e-06	TCCGTACGACG	Daucus carota
DCAR_026483	PgGF14-14	459	466	-	5.62e-06	CTAGGGCA	Daucus carota
DCAR_026483	PgGF14-16	459	466	-	5.62e-06	CTAGGGCA	Daucus carota
DCAR_026483	PgGF14-17	462	469	-	5.62e-06	CTAGGGCA	Daucus carota
DCAR_026483	PgGF14-5	453	460	-	5.62e-06	CTAGGGCA	Daucus carota
DCAR_026483	PgGF14-6	462	469	-	5.62e-06	CTAGGGCA	Daucus carota
DCAR_026689	PgGF14-24	486	500	-	4.8e-06	CACGTGACCAGTAAG	Daucus carota
DCAR_026883	PgGF14-41	460	470	-	3.06e-06	GTGGGTCCCTT	Daucus carota
DCAR_026883	PgGF14-42	462	472	-	3.06e-06	GTGGGTCCCTT	Daucus carota
DCAR_027802	PgGF14-32	421	435	-	1.91e-06	CGTATCACGCACGCA	Daucus carota
DCAR_028858	PgGF14-15	207	223	+	6.43e-06	CCCACGTGGAGAACATA	Daucus carota
DCAR_028893	PgGF14-4	479	489	+	5.33e-06	CAAAGTCAACC	Daucus carota
DCAR_029297	PgGF14-15	206	215	+	2e-06	ACCCACGTGG	Daucus carota
DCAR_029297	PgGF14-15	462	471	-	1.51e-06	TGCCACGTGG	Daucus carota
DCAR_029297	PgGF14-31	306	315	-	1.34e-06	TGCCACGTGA	Daucus carota
DCAR_029300	PgGF14-15	519	533	+	2.45e-06	CCCAACAACTACCCC	Daucus carota
DCAR_029300	PgGF14-28	486	500	-	8.68e-06	CCCACCAAACAGCGA	Daucus carota
DCAR_029300	PgGF14-31	363	377	+	6.54e-06	CCCACCAACTTGCCC	Daucus carota
DCAR_029300	PgGF14-31	401	415	+	2.23e-06	GTCACCAACCACATC	Daucus carota
DCAR_029300	PgGF14-31	467	481	+	3.92e-06	ACCACCAACCATTGC	Daucus carota
DCAR_029300	PgGF14-40	480	494	-	8.68e-06	CCCACCAAACAGCGA	Daucus carota
DCAR_029300	PgGF14-8	523	537	+	9.99e-06	CTCAACTAACACCTC	Daucus carota
DCAR_029302	PgGF14-15	519	533	+	2.45e-06	CCCAACAACTACCCC	Daucus carota
DCAR_029302	PgGF14-28	486	500	-	8.68e-06	CCCACCAAACAGCGA	Daucus carota
DCAR_029302	PgGF14-31	363	377	+	6.54e-06	CCCACCAACTTGCCC	Daucus carota
DCAR_029302	PgGF14-31	401	415	+	2.23e-06	GTCACCAACCACATC	Daucus carota
DCAR_029302	PgGF14-31	467	481	+	3.92e-06	ACCACCAACCATTGC	Daucus carota
DCAR_029302	PgGF14-40	480	494	-	8.68e-06	CCCACCAAACAGCGA	Daucus carota
DCAR_029302	PgGF14-8	523	537	+	9.99e-06	CTCAACTAACACCTC	Daucus carota
DCAR_030745	PgGF14-28	490	510	-	3.48e-06	CAAAAGCTCGCCCACCAAACA	Daucus carota
DCAR_030745	PgGF14-31	353	373	+	3.03e-06	GTATGGCCCCCCCACCAACTT	Daucus carota
DCAR_030745	PgGF14-31	391	411	+	9.16e-06	GCAAAACCAGGTCACCAACCA	Daucus carota
DCAR_030745	PgGF14-31	457	477	+	9.95e-07	ACTCATGACAACCACCAACCA	Daucus carota
DCAR_030745	PgGF14-33	457	477	+	9.95e-07	ACTCATGACAACCACCAACCA	Daucus carota
DCAR_030745	PgGF14-40	484	504	-	3.48e-06	CAAAAGCTCGCCCACCAAACA	Daucus carota
DCAR_030989	PgGF14-11	462	480	+	2.77e-06	TCTCTCCTCTCTCCGCCTC	Daucus carota
DCAR_030989	PgGF14-11	468	486	+	2.28e-06	CTCTCTCCGCCTCTCTCTC	Daucus carota
DCAR_030989	PgGF14-11	476	494	+	3.85e-06	GCCTCTCTCTCTCCTCCTC	Daucus carota
DCAR_030989	PgGF14-11	479	497	+	2.15e-06	TCTCTCTCTCCTCCTCCCA	Daucus carota
DCAR_030989	PgGF14-14	513	531	+	5.09e-06	ACTCCTCAGCCTCTTTCCC	Daucus carota
DCAR_030989	PgGF14-21	109	127	+	2.32e-07	CTCCCTCCCCCTCTCTCTC	Daucus carota
DCAR_030989	PgGF14-21	112	130	+	1.92e-07	CCTCCCCCTCTCTCTCCCC	Daucus carota
DCAR_030989	PgGF14-21	115	133	+	7.03e-08	CCCCCTCTCTCTCCCCCTC	Daucus carota
DCAR_030989	PgGF14-21	118	136	+	6.45e-08	CCTCTCTCTCCCCCTCCCC	Daucus carota
DCAR_030989	PgGF14-21	121	139	+	2.76e-06	CTCTCTCCCCCTCCCCCAA	Daucus carota
DCAR_030989	PgGF14-21	543	561	+	8.4e-06	CTTCCCTCTCTTCATAATC	Daucus carota
DCAR_030989	PgGF14-31	519	537	+	1.78e-06	TCTCCTCTTTCTACTTCTC	Daucus carota
DCAR_030989	PgGF14-31	522	540	+	4.48e-06	CCTCTTTCTACTTCTCTAC	Daucus carota
DCAR_030989	PgGF14-33	519	537	+	5.82e-06	TCTCCTCTTTCTACTTCAC	Daucus carota
DCAR_030989	PgGF14-39	102	120	+	4.51e-08	ACTCCTCCTCCTCCTATTC	Daucus carota
DCAR_030989	PgGF14-39	105	123	+	1.65e-06	CCTCCTCCTCCTATTCAAA	Daucus carota
DCAR_030989	PgGF14-39	99	117	+	1.74e-06	TACACTCCTCCTCCTCCTA	Daucus carota
DCAR_031077	PgGF14-15	455	475	-	3.32e-06	CTGATGCCACGTGGAGAAGTT	Daucus carota
DCAR_031077	PgGF14-15	501	521	-	6.66e-06	GGGGGGACACGTGTATCTGCA	Daucus carota
DCAR_031077	PgGF14-31	299	319	-	5.92e-06	GTTCTGCCACGTGAAAAACTG	Daucus carota
DCAR_031543	PgGF14-12	337	347	-	7.96e-06	GGAGTTGTTGG	Daucus carota
DCAR_031543	PgGF14-31	402	412	-	7.52e-07	GTGGTTGGTGA	Daucus carota
DCAR_031543	PgGF14-31	468	478	-	1.82e-06	ATGGTTGGTGG	Daucus carota
DCAR_031543	PgGF14-33	468	478	-	1.82e-06	ATGGTTGGTGG	Daucus carota
DCAR_031543	PgGF14-7	441	451	-	6.93e-06	GCTGTTGTTGG	Daucus carota
DCAR_032388	PgGF14-27	93	103	+	3.75e-06	TCAGTCAATCA	Daucus carota

## Sheet: Over-represented TFs
Over-represented TFs Among all reciprocal relationships
TF	Background_all	Background_bind	Query_all	Query_bind	p_value	q_value
DCAR_004466	32113	466	42	8	7.706e-09	5.807e-07
DCAR_006433	32113	478	42	8	9.598e-09	5.807e-07
DCAR_026483	32113	156	42	5	5.417e-08	2.185e-06
DCAR_014851	32113	418	42	5	1.656e-05	0.0005009
DCAR_015921	32113	6755	42	20	2.996e-05	0.000725
DCAR_017498	32113	5196	42	17	3.824e-05	0.0007711
DCAR_008218	32113	813	42	6	8.097e-05	0.0014
DCAR_023899	32113	6284	42	18	0.0001403	0.001953
DCAR_025687	32113	3195	42	12	0.0001453	0.001953
DCAR_004170	32113	6429	42	18	0.0001922	0.002326
DCAR_020697	32113	449	42	4	0.0002903	0.003193
DCAR_006961	32113	753	42	5	0.0004163	0.004198
DCAR_010506	32113	779	42	5	0.000498	0.004635
DCAR_003095	32113	531	42	4	0.0006229	0.005384
DCAR_002896	32113	584	42	4	0.0009543	0.007217
DCAR_002897	32113	584	42	4	0.0009543	0.007217
DCAR_026137	32113	2465	42	9	0.00105	0.007472
DCAR_007539	32113	659	42	4	0.001628	0.01094
DCAR_016172	32113	2657	42	9	0.001854	0.0118
DCAR_003659	32113	694	42	4	0.002041	0.01203
DCAR_000747	32113	415	42	3	0.002088	0.01203
DCAR_017600	32113	441	42	3	0.0026	0.01379
DCAR_004494	32113	442	42	3	0.002621	0.01379
DCAR_020809	32113	269	42	2	0.005243	0.02643
DCAR_015806	32113	1383	42	5	0.008776	0.03792
DCAR_029300	32113	1383	42	5	0.008776	0.03792
DCAR_029302	32113	1383	42	5	0.008776	0.03792
DCAR_001133	32113	385	42	2	0.01389	0.05797
DCAR_023944	32113	392	42	2	0.01458	0.05879
DCAR_010092	32113	400	42	2	0.01538	0.06003
DCAR_023184	32113	407	42	2	0.0161	0.06088
DCAR_009603	32113	431	42	2	0.01872	0.06663
DCAR_010178	32113	448	42	2	0.02071	0.07161
DCAR_029297	32113	477	42	2	0.02437	0.08191
DCAR_009089	32113	1355	42	4	0.03101	0.09873
DCAR_021667	32113	2898	42	7	0.03208	0.09954
DCAR_014495	32113	971	42	3	0.0375	0.1051
DCAR_023690	32113	1024	42	3	0.04418	0.1147

## Sheet: TF annotation
Gene Interaction Relationships and TF annotation
TF	Gene name	TF type
DCAR_023899	PgGF14-11	AP2
DCAR_023899	PgGF14-14	AP2
DCAR_023899	PgGF14-16	AP2
DCAR_023899	PgGF14-20	AP2
DCAR_023899	PgGF14-21	AP2
DCAR_023899	PgGF14-22	AP2
DCAR_023899	PgGF14-23	AP2
DCAR_023899	PgGF14-26	AP2
DCAR_023899	PgGF14-29	AP2
DCAR_023899	PgGF14-32	AP2
DCAR_023899	PgGF14-35	AP2
DCAR_023899	PgGF14-36	AP2
DCAR_023899	PgGF14-37	AP2
DCAR_023899	PgGF14-40	AP2
DCAR_023899	PgGF14-41	AP2
DCAR_023899	PgGF14-42	AP2
DCAR_023899	PgGF14-7	AP2
DCAR_023899	PgGF14-8	AP2
DCAR_021667	PgGF14-10	B3
DCAR_021667	PgGF14-20	B3
DCAR_021667	PgGF14-21	B3
DCAR_021667	PgGF14-26	B3
DCAR_021667	PgGF14-30	B3
DCAR_021667	PgGF14-36	B3
DCAR_021667	PgGF14-41	B3
DCAR_017498	PgGF14-11	BBR-BPC
DCAR_017498	PgGF14-13	BBR-BPC
DCAR_017498	PgGF14-14	BBR-BPC
DCAR_017498	PgGF14-17	BBR-BPC
DCAR_017498	PgGF14-21	BBR-BPC
DCAR_017498	PgGF14-26	BBR-BPC
DCAR_017498	PgGF14-27	BBR-BPC
DCAR_017498	PgGF14-29	BBR-BPC
DCAR_017498	PgGF14-37	BBR-BPC
DCAR_017498	PgGF14-39	BBR-BPC
DCAR_017498	PgGF14-40	BBR-BPC
DCAR_017498	PgGF14-41	BBR-BPC
DCAR_017498	PgGF14-42	BBR-BPC
DCAR_017498	PgGF14-5	BBR-BPC
DCAR_017498	PgGF14-6	BBR-BPC
DCAR_017498	PgGF14-7	BBR-BPC
DCAR_017498	PgGF14-8	BBR-BPC
DCAR_004170	PgGF14-11	BBR-BPC
DCAR_004170	PgGF14-13	BBR-BPC
DCAR_004170	PgGF14-14	BBR-BPC
DCAR_004170	PgGF14-16	BBR-BPC
DCAR_004170	PgGF14-17	BBR-BPC
DCAR_004170	PgGF14-21	BBR-BPC
DCAR_004170	PgGF14-26	BBR-BPC
DCAR_004170	PgGF14-27	BBR-BPC
DCAR_004170	PgGF14-29	BBR-BPC
DCAR_004170	PgGF14-31	BBR-BPC
DCAR_004170	PgGF14-33	BBR-BPC
DCAR_004170	PgGF14-37	BBR-BPC
DCAR_004170	PgGF14-40	BBR-BPC
DCAR_004170	PgGF14-42	BBR-BPC
DCAR_004170	PgGF14-5	BBR-BPC
DCAR_004170	PgGF14-6	BBR-BPC
DCAR_004170	PgGF14-7	BBR-BPC
DCAR_004170	PgGF14-8	BBR-BPC
DCAR_010178	PgGF14-15	bHLH
DCAR_010178	PgGF14-24	bHLH
DCAR_029297	PgGF14-15	bHLH
DCAR_029297	PgGF14-31	bHLH
DCAR_008218	PgGF14-1	bZIP
DCAR_008218	PgGF14-15	bZIP
DCAR_008218	PgGF14-2	bZIP
DCAR_008218	PgGF14-23	bZIP
DCAR_008218	PgGF14-3	bZIP
DCAR_008218	PgGF14-31	bZIP
DCAR_006961	PgGF14-1	bZIP
DCAR_006961	PgGF14-2	bZIP
DCAR_006961	PgGF14-23	bZIP
DCAR_006961	PgGF14-3	bZIP
DCAR_006961	PgGF14-31	bZIP
DCAR_003095	PgGF14-1	bZIP
DCAR_003095	PgGF14-2	bZIP
DCAR_003095	PgGF14-23	bZIP
DCAR_003095	PgGF14-3	bZIP
DCAR_002896	PgGF14-1	bZIP
DCAR_002896	PgGF14-2	bZIP
DCAR_002896	PgGF14-23	bZIP
DCAR_002896	PgGF14-3	bZIP
DCAR_002897	PgGF14-1	bZIP
DCAR_002897	PgGF14-2	bZIP
DCAR_002897	PgGF14-23	bZIP
DCAR_002897	PgGF14-3	bZIP
DCAR_007539	PgGF14-1	bZIP
DCAR_007539	PgGF14-2	bZIP
DCAR_007539	PgGF14-23	bZIP
DCAR_007539	PgGF14-3	bZIP
DCAR_023944	PgGF14-7	bZIP
DCAR_023944	PgGF14-8	bZIP
DCAR_010092	PgGF14-7	bZIP
DCAR_010092	PgGF14-8	bZIP
DCAR_025687	PgGF14-11	Dof
DCAR_025687	PgGF14-19	Dof
DCAR_025687	PgGF14-20	Dof
DCAR_025687	PgGF14-21	Dof
DCAR_025687	PgGF14-26	Dof
DCAR_025687	PgGF14-28	Dof
DCAR_025687	PgGF14-29	Dof
DCAR_025687	PgGF14-32	Dof
DCAR_025687	PgGF14-33	Dof
DCAR_025687	PgGF14-35	Dof
DCAR_025687	PgGF14-40	Dof
DCAR_025687	PgGF14-42	Dof
DCAR_020697	PgGF14-31	Dof
DCAR_020697	PgGF14-33	Dof
DCAR_020697	PgGF14-37	Dof
DCAR_020697	PgGF14-39	Dof
DCAR_026137	PgGF14-11	Dof
DCAR_026137	PgGF14-21	Dof
DCAR_026137	PgGF14-25	Dof
DCAR_026137	PgGF14-26	Dof
DCAR_026137	PgGF14-28	Dof
DCAR_026137	PgGF14-29	Dof
DCAR_026137	PgGF14-31	Dof
DCAR_026137	PgGF14-33	Dof
DCAR_026137	PgGF14-40	Dof
DCAR_016172	PgGF14-11	Dof
DCAR_016172	PgGF14-21	Dof
DCAR_016172	PgGF14-26	Dof
DCAR_016172	PgGF14-28	Dof
DCAR_016172	PgGF14-29	Dof
DCAR_016172	PgGF14-32	Dof
DCAR_016172	PgGF14-33	Dof
DCAR_016172	PgGF14-35	Dof
DCAR_016172	PgGF14-40	Dof
DCAR_003659	PgGF14-1	Dof
DCAR_003659	PgGF14-2	Dof
DCAR_003659	PgGF14-23	Dof
DCAR_003659	PgGF14-3	Dof
DCAR_004466	PgGF14-13	GATA
DCAR_004466	PgGF14-14	GATA
DCAR_004466	PgGF14-16	GATA
DCAR_004466	PgGF14-17	GATA
DCAR_004466	PgGF14-19	GATA
DCAR_004466	PgGF14-27	GATA
DCAR_004466	PgGF14-5	GATA
DCAR_004466	PgGF14-6	GATA
DCAR_006433	PgGF14-13	GATA
DCAR_006433	PgGF14-14	GATA
DCAR_006433	PgGF14-16	GATA
DCAR_006433	PgGF14-17	GATA
DCAR_006433	PgGF14-19	GATA
DCAR_006433	PgGF14-27	GATA
DCAR_006433	PgGF14-5	GATA
DCAR_006433	PgGF14-6	GATA
DCAR_015921	PgGF14-1	MIKC_MADS
DCAR_015921	PgGF14-11	MIKC_MADS
DCAR_015921	PgGF14-13	MIKC_MADS
DCAR_015921	PgGF14-14	MIKC_MADS
DCAR_015921	PgGF14-16	MIKC_MADS
DCAR_015921	PgGF14-17	MIKC_MADS
DCAR_015921	PgGF14-20	MIKC_MADS
DCAR_015921	PgGF14-21	MIKC_MADS
DCAR_015921	PgGF14-25	MIKC_MADS
DCAR_015921	PgGF14-26	MIKC_MADS
DCAR_015921	PgGF14-27	MIKC_MADS
DCAR_015921	PgGF14-28	MIKC_MADS
DCAR_015921	PgGF14-29	MIKC_MADS
DCAR_015921	PgGF14-39	MIKC_MADS
DCAR_015921	PgGF14-40	MIKC_MADS
DCAR_015921	PgGF14-42	MIKC_MADS
DCAR_015921	PgGF14-5	MIKC_MADS
DCAR_015921	PgGF14-6	MIKC_MADS
DCAR_015921	PgGF14-7	MIKC_MADS
DCAR_015921	PgGF14-8	MIKC_MADS
DCAR_014851	PgGF14-18	MYB
DCAR_014851	PgGF14-22	MYB
DCAR_014851	PgGF14-26	MYB
DCAR_014851	PgGF14-29	MYB
DCAR_014851	PgGF14-37	MYB
DCAR_000747	PgGF14-22	MYB
DCAR_000747	PgGF14-29	MYB
DCAR_000747	PgGF14-37	MYB
DCAR_017600	PgGF14-20	MYB
DCAR_017600	PgGF14-21	MYB
DCAR_017600	PgGF14-35	MYB
DCAR_004494	PgGF14-22	MYB
DCAR_004494	PgGF14-29	MYB
DCAR_004494	PgGF14-37	MYB
DCAR_020809	PgGF14-20	MYB
DCAR_020809	PgGF14-21	MYB
DCAR_015806	PgGF14-15	MYB
DCAR_015806	PgGF14-28	MYB
DCAR_015806	PgGF14-31	MYB
DCAR_015806	PgGF14-40	MYB
DCAR_015806	PgGF14-8	MYB
DCAR_029300	PgGF14-15	MYB
DCAR_029300	PgGF14-28	MYB
DCAR_029300	PgGF14-31	MYB
DCAR_029300	PgGF14-40	MYB
DCAR_029300	PgGF14-8	MYB
DCAR_029302	PgGF14-15	MYB
DCAR_029302	PgGF14-28	MYB
DCAR_029302	PgGF14-31	MYB
DCAR_029302	PgGF14-40	MYB
DCAR_023184	PgGF14-25	MYB
DCAR_023184	PgGF14-27	MYB
DCAR_009089	PgGF14-15	MYB
DCAR_009089	PgGF14-25	MYB
DCAR_009089	PgGF14-31	MYB
DCAR_009089	PgGF14-8	MYB
DCAR_026483	PgGF14-14	MYB_related
DCAR_026483	PgGF14-16	MYB_related
DCAR_026483	PgGF14-17	MYB_related
DCAR_026483	PgGF14-5	MYB_related
DCAR_026483	PgGF14-6	MYB_related
DCAR_010506	PgGF14-14	MYB_related
DCAR_010506	PgGF14-16	MYB_related
DCAR_010506	PgGF14-17	MYB_related
DCAR_010506	PgGF14-5	MYB_related
DCAR_010506	PgGF14-6	MYB_related
DCAR_009603	PgGF14-16	NAC
DCAR_009603	PgGF14-38	NAC
DCAR_014495	PgGF14-33	TCP
DCAR_014495	PgGF14-41	TCP
DCAR_014495	PgGF14-42	TCP
DCAR_023690	PgGF14-33	TCP
DCAR_023690	PgGF14-41	TCP
DCAR_023690	PgGF14-42	TCP
DCAR_001133	PgGF14-20	Trihelix
DCAR_001133	PgGF14-42	Trihelix
