# Supplementary material for: Molecular analysis of the 14-3-3 genes in Panax ginseng and their responses to heat stress
Source: PeerJ. 2023 May 9;11:e15331. doi: 10.7717/peerj.15331 (PMC10178371; doi:10.7717/peerj.15331)
Supplement: Supplemental Information 8 — The expression of PgGF14s in different tissues of ginseng were measured as homogenized TPM values, and the Log2 (TPM+1) values used for heat map construction were listed. [file peerj-11-15331-s008.xlsx]

## Sheet: TPM
TPM values of PgGF14s in various parts of ginseng
Group	Gene	fiber root	leg root	main root epiderm	main root cortex	rhizome	arm root	stem	leaf peduncle	leaflet pedicel	leaf blade	fruit peduncle	fruit pedicel	fruit flesh	seed
ε	PgGF14-18	1.01	1.7	2.44	0.71	2.04	1.91	0	0	2.12	0.75	0	0	0	0
ε	PgGF14-22	6.06	9.35	9.78	2.14	3.4	6.68	3.38	1.26	0	0.75	0.35	0.43	1.9	1.52
ε	PgGF14-26	2.21	1.12	0.43	0	1.05	0	0.61	1.55	1	0.59	3.15	0.62	1.76	0.54
ε	PgGF14-29	10.09	8.58	6	4.07	8.99	6.28	10.01	15.61	8.46	17.74	19.35	12.6	8.88	6.24
ε	PgGF14-31	123.96	106.54	74	127.42	107.49	96.88	180.82	134.26	147.66	79.24	106.94	93.31	91.16	31.19
ε	PgGF14-32	9.88	11.63	14.42	13.29	12.91	7.53	12.71	10.78	13.28	9.62	11.35	7.16	14.13	4
ε	PgGF14-33	73.05	79.85	58.15	50.04	93.78	76.1	70.08	52.19	83.67	47.2	51.91	45.58	56.78	23.99
ε	PgGF14-35	37.33	33.85	28.05	27.39	33.5	40.19	21.76	22.09	44.92	24.81	30.27	28.81	33.49	13.98
ε	PgGF14-41	35.48	39.89	47.03	50.85	34.1	32.83	56.49	37.32	41.64	30.02	45.04	33.17	29.26	19.66
ε	PgGF14-42	34.76	30.7	42.82	43.59	36.77	26.14	57.15	38.6	38.88	43.14	53.05	40.01	34.72	25.58
ε	PgGF14-1	7.97	3.14	5.05	16.97	8.26	11.01	11.31	6.47	13.35	4.76	12.42	6.87	8.36	5.17
Non-ε	PgGF14-11	67.11	63.27	51.04	38.25	47.15	54.71	35.64	43.54	50.22	42.79	35.1	28.24	21.62	9.01
Non-ε	PgGF14-38	3.11	2.73	1.93	2.59	1.77	1.61	3.11	3.59	4.43	3.7	1.69	3.03	2.64	0.69
Non-ε	PgGF14-10	44.04	42.28	12.47	10.89	33.07	49.08	6.68	5.85	10.74	2.72	4.13	3.31	8.6	6.72
Non-ε	PgGF14-27	7.66	6.7	9.18	7.77	6.65	3.37	8.61	6.43	6.49	11.16	7.4	5.76	3.59	5.18
Non-ε	PgGF14-7	156.07	155.18	102.74	55.03	90.64	147.91	74.87	95.55	140.68	77.99	78.46	62.79	71.19	37.24
Non-ε	PgGF14-25	221.66	227.78	180.91	141.4	177.52	222.31	203.85	159.64	183.23	139.29	234.04	155.57	173.21	86.48
Non-ε	PgGF14-19	92.28	98.45	60.09	14.51	35.84	93.78	65.85	105.94	143.07	92.62	96.7	55.08	38.15	11.91
Non-ε	PgGF14-28	92.35	93.11	98.44	90.15	97.9	89.17	169.82	117.89	164.08	76.19	155.49	146.37	140.75	72.56
Non-ε	PgGF14-21	195.54	216.61	119.08	76.73	133.22	217.52	95.81	98.23	109.41	75.14	86.91	102.04	64.19	29.55
Non-ε	PgGF14-23	1.52	0.52	0	2.45	1.86	1.7	1.75	1.08	2.41	1.93	2.38	3.78	1.4	1.74
Non-ε	PgGF14-9	45.69	51.04	20.49	14.94	29.18	51.17	8.26	22.05	20.54	18.14	11.15	15.45	12.9	5.26
Non-ε	PgGF14-20	79.44	70.93	50.74	41.82	68.2	80.48	54.91	59.83	60.72	43.37	38.92	61.63	30.3	19.44
Non-ε	PgGF14-14	0	2.51	7.56	2.37	3	0.55	0	0	2.33	0.62	1.73	2.92	3.61	0.84
Non-ε	PgGF14-39	15.66	14.62	30.81	31.52	17.45	14.28	28.85	21.54	24.12	21.96	18.21	14.96	14.02	7.15
Non-ε	PgGF14-37	86.19	84.75	62.06	47.54	75.73	91.12	37.02	67.97	75.61	45.95	62.6	67.24	48.27	22.16
Non-ε	PgGF14-34	156.6	156.71	122.49	104.63	96.53	135.33	150.82	140.12	151.53	133.86	204.66	113.99	212.35	49.57
Non-ε	PgGF14-30	135.45	132.18	111.95	119.62	134.57	137.58	143.06	129.88	142.08	96.83	163.1	176.21	309.51	100.27
Non-ε	PgGF14-36	19.97	21.35	20.76	12.32	23.59	17.15	22.72	34.75	32.68	34.87	35.95	60.25	61.44	20.53
Non-ε	PgGF14-8	115.29	125.29	67.18	23.36	48.96	94.62	49.18	62.08	79.61	37.82	41.74	32.85	39.24	19.69
Non-ε	PgGF14-40	15.4	13.96	13.27	11.74	12.99	14.62	19.07	15.49	16.21	12.48	18.94	18.73	17.1	10.07

## Sheet: log2(TPM+1)
Log2(TPM +1) values of PgGF14s in various parts of ginseng
Group	Gene	fiber root	leg root	main root epiderm	main root cortex	rhizome	arm root	stem	leaf peduncle	leaflet pedicel	leaf blade	fruit peduncle	fruit pedicel	fruit flesh	seed
ε	PgGF14-18	1.0072	1.43296	1.78241	0.773996	1.60407	1.54102	0	0	1.64155	0.807355	0	0	0	0
ε	PgGF14-22	2.81967	3.37156	3.43029	1.65076	2.1375	2.94111	2.13093	1.17632	0	0.807355	0.432959	0.516015	1.53605	1.33342
ε	PgGF14-26	1.68257	1.08406	0.516015	0	1.03562	0	0.687061	1.3505	1	0.669027	2.05311	0.695994	1.46467	0.62293
ε	PgGF14-29	3.47119	3.26003	2.80735	2.34199	3.32048	2.86394	3.46074	4.05398	3.24184	4.22805	4.34696	3.76553	3.30451	2.85599
ε	PgGF14-31	6.96532	6.74873	6.22882	7.00473	6.76142	6.61294	7.50637	7.07959	7.21587	6.32625	6.75409	6.55934	6.52607	5.00854
ε	PgGF14-32	3.44361	3.65878	3.94673	3.83693	3.79805	3.09255	3.77716	3.55827	3.83592	3.40871	3.62644	3.02857	3.91934	2.32193
ε	PgGF14-33	6.21043	6.33718	5.88631	5.67356	6.56651	6.26866	6.15137	5.73308	6.40378	5.59096	5.72547	5.54164	5.8525	4.64328
ε	PgGF14-35	5.2604	5.12309	4.86047	4.82731	5.10852	5.36422	4.50843	4.5292	5.52105	4.68986	4.96671	4.89772	5.10811	3.90497
ε	PgGF14-41	5.18903	5.35368	5.58586	5.69627	5.1334	5.08023	5.84524	5.26003	5.41414	4.95513	5.52482	5.09466	4.91934	4.36877
ε	PgGF14-42	5.16027	4.98641	5.45352	5.47865	5.23917	4.76235	5.86171	5.30743	5.31759	5.46401	5.75622	5.3579	5.15866	4.73227
ε	PgGF14-1	3.16511	2.04963	2.59694	4.16752	3.21101	3.58616	3.62176	2.90111	3.84298	2.52607	3.74631	2.97636	3.22651	2.62527
Non-ε	PgGF14-11	6.08979	6.00607	5.70155	5.29462	5.58946	5.79986	5.19535	5.47703	5.67864	5.45253	5.17393	4.86987	4.49953	3.32337
Non-ε	PgGF14-38	2.03914	1.89918	1.5509	1.84398	1.46989	1.38405	2.03914	2.19849	2.44095	2.23266	1.42761	2.01078	1.86394	0.757023
Non-ε	PgGF14-10	5.49313	5.43563	3.75168	3.57168	5.09043	5.64616	2.94111	2.7761	3.55336	1.8953	2.35896	2.10769	3.26303	2.9486
Non-ε	PgGF14-27	3.11437	2.94486	3.34767	3.13258	2.93546	2.12763	3.26454	2.89336	2.90497	3.60407	3.07039	2.75702	2.19849	2.62761
Non-ε	PgGF14-7	7.29526	7.28707	6.69683	5.80813	6.51791	7.2183	6.24546	6.5932	7.14649	6.3036	6.31216	5.99526	6.17373	5.25701
Non-ε	PgGF14-25	7.7987	7.83782	7.50708	7.15381	7.47994	7.8029	7.67842	7.32769	7.52536	7.13227	7.87676	7.29066	7.44468	6.45088
Non-ε	PgGF14-19	6.5435	6.6359	5.93286	3.95513	5.2032	6.56651	6.06286	6.74066	7.17063	6.54874	6.61029	5.80941	5.29094	3.69042
Non-ε	PgGF14-28	6.54458	6.55628	6.63575	6.51017	6.6279	6.49458	7.41633	6.89348	7.36702	6.27034	7.28993	7.2033	7.1472	6.20085
Non-ε	PgGF14-21	7.61868	7.7656	6.90785	6.2804	7.06846	7.77162	6.59708	6.6327	6.78673	6.25058	6.45796	6.68706	6.02658	4.9331
Non-ε	PgGF14-23	1.33342	0.604071	0	1.7866	1.51602	1.43296	1.45943	1.05658	1.76977	1.5509	1.75702	2.25701	1.26303	1.45418
Non-ε	PgGF14-9	5.54504	5.70155	4.42559	3.99458	4.91552	5.70515	3.21101	4.52669	4.42895	4.25852	3.60288	4.04002	3.79701	2.64616
Non-ε	PgGF14-20	6.32984	6.16852	5.69321	5.42021	6.1127	6.34837	5.80503	5.92671	5.94767	5.47151	5.31904	5.96878	4.96809	4.35332
Non-ε	PgGF14-14	0	1.81147	3.09761	1.75275	2	0.632268	0	0	1.73552	0.695994	1.4489	1.97085	2.20477	0.879706
Non-ε	PgGF14-39	4.05832	3.96532	4.99141	5.02326	4.20555	3.93357	4.89966	4.49442	4.65076	4.52105	4.26379	3.99639	3.90881	3.0268
Non-ε	PgGF14-37	6.44609	6.42206	5.97865	5.6011	6.26172	6.52544	5.24869	6.1079	6.25946	5.55305	5.99095	6.09255	5.62264	4.53356
Non-ε	PgGF14-34	7.30012	7.30113	6.94825	6.72288	6.60777	7.09096	7.24622	7.14078	7.25295	7.07532	7.68412	6.84536	7.73708	5.66021
Non-ε	PgGF14-30	7.09223	7.05723	6.81954	6.91433	7.08289	7.11458	7.17053	7.0321	7.16068	6.61221	7.35843	7.46932	8.2785	6.66206
Non-ε	PgGF14-36	4.39025	4.4822	4.44361	3.73552	4.62	4.1819	4.56803	5.15987	5.07382	5.16471	5.2075	5.93664	5.9644	4.42828
Non-ε	PgGF14-8	6.86158	6.9806	6.09128	4.60644	5.6427	6.57924	5.64904	5.97911	6.33289	5.27873	5.41752	5.08108	5.33056	4.37086
Non-ε	PgGF14-40	4.03562	3.90304	3.83491	3.67129	3.80632	3.96532	4.32697	4.04352	4.10518	3.75275	4.31759	4.30232	4.17792	3.46858
