# Supplementary material for: Molecular analysis of the 14-3-3 genes in Panax ginseng and their responses to heat stress
Source: PeerJ. 2023 May 9;11:e15331. doi: 10.7717/peerj.15331 (PMC10178371; doi:10.7717/peerj.15331)
Supplement: Supplemental Information 9 — The raw Cq value data for qRT-PCR with the statistically significant differences and SD of three biological replicates and two technical replicates. [file peerj-11-15331-s009.xls]

## Sheet: 12h
Raw data for qRT-PCR Cq values under 12 h heat stress
Stress time (35℃)	gene	Cq	gene	Cq	gene	Cq	gene	Cq	gene	Cq	gene	cq
0 h	PgGF14-20	22.1	β-Actin	18.79	β-Actin	18.35	β-Actin	18.19	β-Actin	18.56	β-Actin	22.58
0 h	PgGF14-20	22.06	β-Actin	18.68	β-Actin	18.44	β-Actin	18.29	β-Actin	19.19	β-Actin	21.18
0 h	PgGF14-20	21.55	β-Actin	18.71	β-Actin	18.55	β-Actin	18.39	β-Actin	18.88	β-Actin	21.35
0 h	PgGF14-20	22.12	β-Actin	-	β-Actin	18.44	β-Actin	18.27	β-Actin	18.46	β-Actin	20.65
0 h	PgGF14-20	22.19	β-Actin	18.74	β-Actin	18.69	β-Actin	18.31	β-Actin	18.87	β-Actin	20.99
0 h	PgGF14-20	22.23	β-Actin	18.56	β-Actin	18.66	β-Actin	18.47	β-Actin	19.28	β-Actin	21.03
12 h	PgGF14-20	21.6	β-Actin	19.38	β-Actin	19.17	β-Actin	19.08	β-Actin	18.65	β-Actin	18.16
12 h	PgGF14-20	21.8	β-Actin	19.29	β-Actin	19.43	β-Actin	19.21	β-Actin	19.04	β-Actin	19.33
12 h	PgGF14-20	21.82	β-Actin	19.18	β-Actin	18.87	β-Actin	19.17	β-Actin	18.79	β-Actin	18.48
12 h	PgGF14-20	21.14	β-Actin	19.18	β-Actin	19.23	β-Actin	19.16	β-Actin	19.09	β-Actin	18.42
12 h	PgGF14-20	21.27	β-Actin	19.3	β-Actin	-	β-Actin	19.13	β-Actin	18.81	β-Actin	18.32
12 h	PgGF14-20	21.43	β-Actin	19.45	β-Actin	18.98	β-Actin	18.85	β-Actin	18.56	β-Actin	18.69
0 h	PgGF14-22	27.54	PgGF14-40	21.08	PgGF14-35	19.87	PgGF14-16	18.6	PgGF14-9	23.37	PgGF14-39	20.72
0 h	PgGF14-22	27.53	PgGF14-40	20.6	PgGF14-35	19.29	PgGF14-16	18.35	PgGF14-9	23.31	PgGF14-39	20.88
0 h	PgGF14-22	27.4	PgGF14-40	20.75	PgGF14-35	19.79	PgGF14-16	18.28	PgGF14-9	23.72	PgGF14-39	20.89
0 h	PgGF14-22	27.17	PgGF14-40	20.7	PgGF14-35	19.77	PgGF14-16	18.33	PgGF14-9	23.45	PgGF14-39	20.82
0 h	PgGF14-22	27.78	PgGF14-40	20.68	PgGF14-35	19.86	PgGF14-16	18.36	PgGF14-9	23.25	PgGF14-39	20.96
0 h	PgGF14-22	27.61	PgGF14-40	20.84	PgGF14-35	-	PgGF14-16	18.5	PgGF14-9	23.6	PgGF14-39	20.75
12 h	PgGF14-22	27.81	PgGF14-40	21.8	PgGF14-35	20.65	PgGF14-16	20.02	PgGF14-9	22.21	PgGF14-39	20.32
12 h	PgGF14-22	27.68	PgGF14-40	21.55	PgGF14-35	21.07	PgGF14-16	19.79	PgGF14-9	22.22	PgGF14-39	20.15
12 h	PgGF14-22	27.56	PgGF14-40	20.91	PgGF14-35	19.82	PgGF14-16	19.87	PgGF14-9	22.43	PgGF14-39	20.11
12 h	PgGF14-22	28.24	PgGF14-40	21.22	PgGF14-35	19.99	PgGF14-16	19.78	PgGF14-9	22.39	PgGF14-39	20.09
12 h	PgGF14-22	27.87	PgGF14-40	21.7	PgGF14-35	20.3	PgGF14-16	19.57	PgGF14-9	22.92	PgGF14-39	19.74
12 h	PgGF14-22	27.53	PgGF14-40	21.59	PgGF14-35	20.52	PgGF14-16	19.83	PgGF14-9	22.68	PgGF14-39	20.18
0 h	PgGF14-27	20.07	PgGF14-42	19.47	PgGF14-23	21.75	PgGF14-13	22.02	PgGF14-26	20.54	PgGF14-38	24.06
0 h	PgGF14-27	19.94	PgGF14-42	19.31	PgGF14-23	21.6	PgGF14-13	22.23	PgGF14-26	20.47	PgGF14-38	24.02
0 h	PgGF14-27	19.87	PgGF14-42	19.54	PgGF14-23	21.59	PgGF14-13	22.07	PgGF14-26	21.09	PgGF14-38	24.29
0 h	PgGF14-27	19.83	PgGF14-42	19.35	PgGF14-23	21.8	PgGF14-13	22.32	PgGF14-26	20.96	PgGF14-38	24.01
0 h	PgGF14-27	19.99	PgGF14-42	19.4	PgGF14-23	21.85	PgGF14-13	22.11	PgGF14-26	21.07	PgGF14-38	24.33
0 h	PgGF14-27	19.94	PgGF14-42	19.54	PgGF14-23	21.88	PgGF14-13	22.66	PgGF14-26	21.35	PgGF14-38	23.56
12 h	PgGF14-27	20.98	PgGF14-42	21.4	PgGF14-23	23.15	PgGF14-13	23.36	PgGF14-26	21.22	PgGF14-38	23.38
12 h	PgGF14-27	21.23	PgGF14-42	21.38	PgGF14-23	-	PgGF14-13	23.36	PgGF14-26	21.56	PgGF14-38	23.47
12 h	PgGF14-27	21.46	PgGF14-42	22.86	PgGF14-23	22.87	PgGF14-13	23.13	PgGF14-26	21.02	PgGF14-38	22.83
12 h	PgGF14-27	21.27	PgGF14-42	21.25	PgGF14-23	23.16	PgGF14-13	23.3	PgGF14-26	20.15	PgGF14-38	23.44
12 h	PgGF14-27	21.31	PgGF14-42	21.27	PgGF14-23	23.36	PgGF14-13	23.22	PgGF14-26	20.98	PgGF14-38	23.2
12 h	PgGF14-27	20.95	PgGF14-42	21.09	PgGF14-23	23.37	PgGF14-13	23.37	PgGF14-26	21.15	PgGF14-38	23.25
0 h	PgGF14-11	23.82	PgGF14-41	20.22	PgGF14-25	20.13	PgGF14-3	20.14	PgGF14-7	21.61	PgGF14-2	20.62
0 h	PgGF14-11	23.74	PgGF14-41	20.02	PgGF14-25	20.07	PgGF14-3	20.27	PgGF14-7	21.17	PgGF14-2	20.88
0 h	PgGF14-11	23.87	PgGF14-41	20.19	PgGF14-25	19.67	PgGF14-3	20.2	PgGF14-7	21.41	PgGF14-2	20.84
0 h	PgGF14-11	23.76	PgGF14-41	20.16	PgGF14-25	19.96	PgGF14-3	19.77	PgGF14-7	20.94	PgGF14-2	20.71
0 h	PgGF14-11	23.94	PgGF14-41	20.06	PgGF14-25	20.01	PgGF14-3	19.14	PgGF14-7	20.76	PgGF14-2	20.91
0 h	PgGF14-11	24.29	PgGF14-41	20.13	PgGF14-25	19.86	PgGF14-3	20.25	PgGF14-7	20.99	PgGF14-2	21.03
12 h	PgGF14-11	25.13	PgGF14-41	29.02	PgGF14-25	20.37	PgGF14-3	21.19	PgGF14-7	20.55	PgGF14-2	19.48
12 h	PgGF14-11	24.55	PgGF14-41	20.72	PgGF14-25	20.51	PgGF14-3	20.99	PgGF14-7	20.76	PgGF14-2	19.65
12 h	PgGF14-11	24.68	PgGF14-41	20.51	PgGF14-25	20.75	PgGF14-3	21.24	PgGF14-7	20.66	PgGF14-2	19.48
12 h	PgGF14-11	24.57	PgGF14-41	20.34	PgGF14-25	20.62	PgGF14-3	21.25	PgGF14-7	20.52	PgGF14-2	19.41
12 h	PgGF14-11	24.66	PgGF14-41	20.8	PgGF14-25	20.68	PgGF14-3	21.3	PgGF14-7	20.71	PgGF14-2	19.6
12 h	PgGF14-11	24.84	PgGF14-41	20.49	PgGF14-25	20.24	PgGF14-3	21.25	PgGF14-7	20.71	PgGF14-2	19.56
0 h	PgGF14-21	22	PgGF14-31	-	PgGF14-14	20.84	PgGF14-5	23.24	PgGF14-8	23.43	PgGF14-10	26.75
0 h	PgGF14-21	21.97	PgGF14-31	25.08	PgGF14-14	21.1	PgGF14-5	22.65	PgGF14-8	23.34	PgGF14-10	26.87
0 h	PgGF14-21	21.85	PgGF14-31	20	PgGF14-14	21.02	PgGF14-5	22.54	PgGF14-8	23.41	PgGF14-10	26.95
0 h	PgGF14-21	22.12	PgGF14-31	20.3	PgGF14-14	21.03	PgGF14-5	22.7	PgGF14-8	23.63	PgGF14-10	26.45
0 h	PgGF14-21	22.19	PgGF14-31	20.31	PgGF14-14	20.92	PgGF14-5	22.82	PgGF14-8	23.4	PgGF14-10	26.6
0 h	PgGF14-21	22.23	PgGF14-31	20.47	PgGF14-14	21.06	PgGF14-5	22.72	PgGF14-8	23.42	PgGF14-10	26.88
12 h	PgGF14-21	21.5	PgGF14-31	21.68	PgGF14-14	23.48	PgGF14-5	22.72	PgGF14-8	22.79	PgGF14-10	22.79
12 h	PgGF14-21	21.37	PgGF14-31	21.16	PgGF14-14	23.78	PgGF14-5	22.58	PgGF14-8	22.63	PgGF14-10	22.78
12 h	PgGF14-21	21.51	PgGF14-31	21.39	PgGF14-14	23.97	PgGF14-5	22.75	PgGF14-8	22.87	PgGF14-10	23.05
12 h	PgGF14-21	21.51	PgGF14-31	21.54	PgGF14-14	23.1	PgGF14-5	22.78	PgGF14-8	22.69	PgGF14-10	22.75
12 h	PgGF14-21	21.46	PgGF14-31	36.08	PgGF14-14	23.53	PgGF14-5	22.6	PgGF14-8	22.88	PgGF14-10	22.79
12 h	PgGF14-21	21.42	PgGF14-31	21.36	PgGF14-14	23.13	PgGF14-5	22.78	PgGF14-8	23.36	PgGF14-10	22.56
0 h	PgGF14-19	24.19	PgGF14-37	22.7	PgGF14-32	19.39	PgGF14-1	19.58	PgGF14-33	20.83	PgGF14-18	29.85
0 h	PgGF14-19	24.41	PgGF14-37	22.91	PgGF14-32	19.22	PgGF14-1	19.72	PgGF14-33	21.26	PgGF14-18	29.64
0 h	PgGF14-19	24.22	PgGF14-37	23.04	PgGF14-32	19.43	PgGF14-1	19.98	PgGF14-33	20.5	PgGF14-18	29.42
0 h	PgGF14-19	24.24	PgGF14-37	23.3	PgGF14-32	19.25	PgGF14-1	20.31	PgGF14-33	20.95	PgGF14-18	29.51
0 h	PgGF14-19	24.17	PgGF14-37	23.13	PgGF14-32	19.63	PgGF14-1	19.89	PgGF14-33	21.43	PgGF14-18	29.51
0 h	PgGF14-19	24.45	PgGF14-37	23.16	PgGF14-32	19.77	PgGF14-1	19.93	PgGF14-33	21.39	PgGF14-18	30.63
12 h	PgGF14-19	23.43	PgGF14-37	23.63	PgGF14-32	20.84	PgGF14-1	21.52	PgGF14-33	21.34	PgGF14-18	27.75
12 h	PgGF14-19	23.38	PgGF14-37	23.91	PgGF14-32	20.52	PgGF14-1	20.98	PgGF14-33	20.77	PgGF14-18	27.68
12 h	PgGF14-19	23.36	PgGF14-37	23.82	PgGF14-32	20.62	PgGF14-1	22.03	PgGF14-33	21.39	PgGF14-18	27.53
12 h	PgGF14-19	23.36	PgGF14-37	23.72	PgGF14-32	20.44	PgGF14-1	21.56	PgGF14-33	21.72	PgGF14-18	27.43
12 h	PgGF14-19	23.34	PgGF14-37	23.99	PgGF14-32	20.48	PgGF14-1	20.93	PgGF14-33	21.33	PgGF14-18	27.82
12 h	PgGF14-19	23.31	PgGF14-37	23.72	PgGF14-32	20.76	PgGF14-1	21.25	PgGF14-33	21.64	PgGF14-18	27.19
0 h	PgGF14-17	23.91	PgGF14-36	20.1	PgGF14-29	25.5	PgGF14-6	24.15	PgGF14-30	26.39	PgGF14-15	28.33
0 h	PgGF14-17	23.87	PgGF14-36	20.17	PgGF14-29	25.03	PgGF14-6	24.46	PgGF14-30	26.66	PgGF14-15	28.77
0 h	PgGF14-17	24.5	PgGF14-36	20.18	PgGF14-29	25.17	PgGF14-6	23.79	PgGF14-30	26.31	PgGF14-15	28.99
0 h	PgGF14-17	24.02	PgGF14-36	19.99	PgGF14-29	24.98	PgGF14-6	24.09	PgGF14-30	26.56	PgGF14-15	28.83
0 h	PgGF14-17	23.6	PgGF14-36	19.97	PgGF14-29	25.12	PgGF14-6	23.3	PgGF14-30	26.02	PgGF14-15	28.75
0 h	PgGF14-17	23.71	PgGF14-36	19.96	PgGF14-29	25.46	PgGF14-6	24.88	PgGF14-30	26.07	PgGF14-15	29.69
12 h	PgGF14-17	25.8	PgGF14-36	21.06	PgGF14-29	26.19	PgGF14-6	26.72	PgGF14-30	26.08	PgGF14-15	26.69
12 h	PgGF14-17	25.59	PgGF14-36	20.68	PgGF14-29	25.67	PgGF14-6	26.57	PgGF14-30	25.99	PgGF14-15	28.24
12 h	PgGF14-17	25.76	PgGF14-36	20.78	PgGF14-29	26.34	PgGF14-6	26.24	PgGF14-30	25.95	PgGF14-15	28.25
12 h	PgGF14-17	25.8	PgGF14-36	21.08	PgGF14-29	25.88	PgGF14-6	26.18	PgGF14-30	26.64	PgGF14-15	28.3
12 h	PgGF14-17	25.52	PgGF14-36	20.43	PgGF14-29	25.77	PgGF14-6	27.12	PgGF14-30	26.35	PgGF14-15	28.19
12 h	PgGF14-17	25.3	PgGF14-36	20.62	PgGF14-29	25.99	PgGF14-6	26.03	PgGF14-30	26.43	PgGF14-15	28.05
0 h	β-Actin	18.94	PgGF14-34	20.23	PgGF14-28	20.79	PgGF14-24	-	PgGF14-12	21.51	PgGF14-4	28.27
0 h	β-Actin	18.67	PgGF14-34	20.13	PgGF14-28	20.56	PgGF14-24	22.09	PgGF14-12	22.02	PgGF14-4	29.17
0 h	β-Actin	18.64	PgGF14-34	20.11	PgGF14-28	20.5	PgGF14-24	21.69	PgGF14-12	22.01	PgGF14-4	28.08
0 h	β-Actin	18.78	PgGF14-34	20.44	PgGF14-28	20.5	PgGF14-24	21.48	PgGF14-12	22.12	PgGF14-4	28.17
0 h	β-Actin	18.94	PgGF14-34	20.32	PgGF14-28	20.54	PgGF14-24	21.91	PgGF14-12	21.78	PgGF14-4	29
0 h	β-Actin	19.18	PgGF14-34	20.54	PgGF14-28	20.72	PgGF14-24	21.59	PgGF14-12	22.03	PgGF14-4	28.38
12 h	β-Actin	19.87	PgGF14-34	20.57	PgGF14-28	21.34	PgGF14-24	22.85	PgGF14-12	21.47	PgGF14-4	27.39
12 h	β-Actin	19.97	PgGF14-34	20.33	PgGF14-28	21.61	PgGF14-24	22.79	PgGF14-12	22.58	PgGF14-4	27.37
12 h	β-Actin	19.72	PgGF14-34	20.5	PgGF14-28	21.7	PgGF14-24	-	PgGF14-12	22.51	PgGF14-4	27.26
12 h	β-Actin	19.73	PgGF14-34	20.43	PgGF14-28	21.57	PgGF14-24	23.57	PgGF14-12	22.3	PgGF14-4	27.13
12 h	β-Actin	19.91	PgGF14-34	-	PgGF14-28	21.39	PgGF14-24	21.53	PgGF14-12	22.37	PgGF14-4	27.11
12 h	β-Actin	19.91	PgGF14-34	20.62	PgGF14-28	21.49	PgGF14-24	23.86	PgGF14-12	22.31	PgGF14-4	27.12

## Sheet: 24h
Raw data for qRT-PCR Cq values under 24 h stress
Stress time (35℃)	gene	Cq	gene	Cq	gene	Cq	gene	Cq	gene	Cq	gene	Cq
0 h	PgGF14-22	27.35	PgGF14-40	21.11	β-Actin	18.66	PgGF14-42	21.12	β-Actin	18.68	PgGF14-3	21.05
0 h	PgGF14-22	27.17	PgGF14-40	21.27	β-Actin	19.08	PgGF14-42	20.88	β-Actin	18.86	PgGF14-3	21.39
0 h	PgGF14-22	27.53	PgGF14-40	21.12	β-Actin	18.79	PgGF14-42	20.56	β-Actin	18.77	PgGF14-3	21.01
0 h	PgGF14-22	27.83	PgGF14-40	21.34	β-Actin	18.91	PgGF14-42	20.72	β-Actin	18.99	PgGF14-3	21.13
0 h	PgGF14-22	27.52	PgGF14-40	21.11	β-Actin	18.65	PgGF14-42	20.54	β-Actin	18.67	PgGF14-3	20.56
0 h	PgGF14-22	27.7	PgGF14-40	21.41	β-Actin	19.11	PgGF14-42	20.68	β-Actin	18.93	PgGF14-3	20.8
24 h	PgGF14-22	26.94	PgGF14-40	22.23	β-Actin	20.74	PgGF14-42	22.88	β-Actin	20.56	PgGF14-3	23.47
24 h	PgGF14-22	26.92	PgGF14-40	22.59	β-Actin	21.02	PgGF14-42	22.94	β-Actin	20.72	PgGF14-3	23.55
24 h	PgGF14-22	27.34	PgGF14-40	22.46	β-Actin	20.88	PgGF14-42	22.11	β-Actin	20.79	PgGF14-3	23.32
24 h	PgGF14-22	27.26	PgGF14-40	22.78	β-Actin	21.02	PgGF14-42	22.15	β-Actin	20.81	PgGF14-3	23.5
24 h	PgGF14-22	27.31	PgGF14-40	22.54	β-Actin	20.49	PgGF14-42	22.01	β-Actin	20.83	PgGF14-3	23.53
24 h	PgGF14-22	27.21	PgGF14-40	22.66	β-Actin	20.81	PgGF14-42	22.03	β-Actin	20.95	PgGF14-3	23.67
0 h	PgGF14-4	30.12	PgGF14-15	28.35	PgGF14-30	20.22	PgGF14-31	20.01	PgGF14-5	23.34	PgGF14-1	20.37
0 h	PgGF14-4	29.92	PgGF14-15	28.27	PgGF14-30	20.52	PgGF14-31	20.25	PgGF14-5	23.46	PgGF14-1	20.75
0 h	PgGF14-4	29.4	PgGF14-15	28.44	PgGF14-30	20.08	PgGF14-31	20.24	PgGF14-5	23.03	PgGF14-1	20.53
0 h	PgGF14-4	29.18	PgGF14-15	28.72	PgGF14-30	20.56	PgGF14-31	20.72	PgGF14-5	23.27	PgGF14-1	20.91
0 h	PgGF14-4	29.66	PgGF14-15	28.56	PgGF14-30	20.57	PgGF14-31	20.44	PgGF14-5	23.23	PgGF14-1	20.59
0 h	PgGF14-4	29.6	PgGF14-15	28.72	PgGF14-30	20.87	PgGF14-31	20.7	PgGF14-5	23.57	PgGF14-1	20.93
24 h	PgGF14-4	25.64	PgGF14-15	31.13	PgGF14-30	22.14	PgGF14-31	22.12	PgGF14-5	24.11	PgGF14-1	22.89
24 h	PgGF14-4	25.98	PgGF14-15	31.31	PgGF14-30	22.36	PgGF14-31	22.36	PgGF14-5	24.29	PgGF14-1	22.93
24 h	PgGF14-4	25.47	PgGF14-15	31.22	PgGF14-30	22.19	PgGF14-31	22.67	PgGF14-5	24.01	PgGF14-1	22.81
24 h	PgGF14-4	25.87	PgGF14-15	31.38	PgGF14-30	22.35	PgGF14-31	22.89	PgGF14-5	24.11	PgGF14-1	23.09
24 h	PgGF14-4	25.19	PgGF14-15	31.01	PgGF14-30	21.87	PgGF14-31	22.15	PgGF14-5	24.01	PgGF14-1	22.76
24 h	PgGF14-4	24.91	PgGF14-15	30.75	PgGF14-30	22.03	PgGF14-31	22.39	PgGF14-5	24.05	PgGF14-1	22.98
0 h	PgGF14-18	27.59	PgGF14-10	28.21	PgGF14-37	23.31	PgGF14-36	19.87	PgGF14-6	24.12	PgGF14-24	21.68
0 h	PgGF14-18	28.15	PgGF14-10	27.79	PgGF14-37	23.47	PgGF14-36	20.07	PgGF14-6	24.32	PgGF14-24	22.12
0 h	PgGF14-18	27.01	PgGF14-10	22.89	PgGF14-37	23.13	PgGF14-36	20.11	PgGF14-6	24.15	PgGF14-24	22.21
0 h	PgGF14-18	27.31	PgGF14-10	23.07	PgGF14-37	23.53	PgGF14-36	20.31	PgGF14-6	24.43	PgGF14-24	21.85
0 h	PgGF14-18	27.44	PgGF14-10	22.76	PgGF14-37	23.16	PgGF14-36	19.63	PgGF14-6	24.22	PgGF14-24	22.13
0 h	PgGF14-18	27.08	PgGF14-10	22.86	PgGF14-37	23.42	PgGF14-36	19.83	PgGF14-6	24.66	PgGF14-24	22.03
24 h	PgGF14-18	26.78	PgGF14-10	23.66	PgGF14-37	24.89	PgGF14-36	20.65	PgGF14-6	25.04	PgGF14-24	23.67
24 h	PgGF14-18	27.22	PgGF14-10	23.76	PgGF14-37	25.25	PgGF14-36	20.83	PgGF14-6	25.24	PgGF14-24	23.83
24 h	PgGF14-18	26.47	PgGF14-10	23.87	PgGF14-37	25.08	PgGF14-36	21.35	PgGF14-6	25.01	PgGF14-24	23.73
24 h	PgGF14-18	27.23	PgGF14-10	24.09	PgGF14-37	25.5	PgGF14-36	21.57	PgGF14-6	25.05	PgGF14-24	24.03
24 h	PgGF14-18	26.03	PgGF14-10	23.75	PgGF14-37	27.66	PgGF14-36	20.88	PgGF14-6	25.12	PgGF14-24	23.69
24 h	PgGF14-18	26.71	PgGF14-10	23.87	PgGF14-37	27.98	PgGF14-36	20.98	PgGF14-6	25.34	PgGF14-24	23.99
0 h	PgGF14-2	18.34	PgGF14-38	22.65	PgGF14-34	20.55	PgGF14-35	20.04	PgGF14-9	22.56	PgGF14-41	21.05
0 h	PgGF14-2	18.82	PgGF14-38	22.73	PgGF14-34	20.17	PgGF14-35	20.22	PgGF14-9	22.74	PgGF14-41	21.19
0 h	PgGF14-2	18.54	PgGF14-38	22.55	PgGF14-34	20.03	PgGF14-35	19.89	PgGF14-9	22.43	PgGF14-41	21.26
0 h	PgGF14-2	18.86	PgGF14-38	22.83	PgGF14-34	20.33	PgGF14-35	20.03	PgGF14-9	22.67	PgGF14-41	21.48
0 h	PgGF14-2	18.76	PgGF14-38	22.62	PgGF14-34	20.44	PgGF14-35	20.09	PgGF14-9	22.46	PgGF14-41	20.87
0 h	PgGF14-2	19.06	PgGF14-38	22.76	PgGF14-34	20.6	PgGF14-35	20.21	PgGF14-9	22.94	PgGF14-41	20.97
24 h	PgGF14-2	20.88	PgGF14-38	23.22	PgGF14-34	22.34	PgGF14-35	22.18	PgGF14-9	24.21	PgGF14-41	34.44
24 h	PgGF14-2	20.98	PgGF14-38	23.46	PgGF14-34	22.26	PgGF14-35	22.4	PgGF14-9	24.51	PgGF14-41	34.68
24 h	PgGF14-2	20.43	PgGF14-38	23.12	PgGF14-34	22.11	PgGF14-35	21.79	PgGF14-9	24.02	PgGF14-41	34.35
24 h	PgGF14-2	20.73	PgGF14-38	23.32	PgGF14-34	22.33	PgGF14-35	21.95	PgGF14-9	24.18	PgGF14-41	34.71
24 h	PgGF14-2	20.74	PgGF14-38	23.09	PgGF14-34	22.13	PgGF14-35	21.66	PgGF14-9	24.16	PgGF14-41	33.76
24 h	PgGF14-2	21.04	PgGF14-38	23.19	PgGF14-34	22.31	PgGF14-35	21.9	PgGF14-9	24.42	PgGF14-41	34.04
0 h	PgGF14-39	19.67	PgGF14-17	24.02	PgGF14-23	22.24	PgGF14-25	21.23	PgGF14-7	20.43	PgGF14-8	22.87
0 h	PgGF14-39	19.93	PgGF14-17	24.38	PgGF14-23	22.48	PgGF14-25	20.81	PgGF14-7	20.65	PgGF14-8	22.95
0 h	PgGF14-39	19.56	PgGF14-17	23.66	PgGF14-23	21.79	PgGF14-25	20.46	PgGF14-7	20.21	PgGF14-8	22.16
0 h	PgGF14-39	19.96	PgGF14-17	24.12	PgGF14-23	22.19	PgGF14-25	20.68	PgGF14-7	20.51	PgGF14-8	22.32
0 h	PgGF14-39	19.69	PgGF14-17	23.74	PgGF14-23	22.32	PgGF14-25	20.54	PgGF14-7	20.58	PgGF14-8	22.51
0 h	PgGF14-39	19.75	PgGF14-17	23.94	PgGF14-23	22.52	PgGF14-25	20.74	PgGF14-7	20.8	PgGF14-8	22.99
24 h	PgGF14-39	21.02	PgGF14-17	25.46	PgGF14-23	23.76	PgGF14-25	20.75	PgGF14-7	23.19	PgGF14-8	23.29
24 h	PgGF14-39	21.4	PgGF14-17	25.56	PgGF14-23	24.06	PgGF14-25	21.23	PgGF14-7	23.35	PgGF14-8	23.87
24 h	PgGF14-39	21.23	PgGF14-17	25.11	PgGF14-23	24.25	PgGF14-25	22.23	PgGF14-7	22.32	PgGF14-8	24.13
24 h	PgGF14-39	21.17	PgGF14-17	25.31	PgGF14-23	23.97	PgGF14-25	22.39	PgGF14-7	22.62	PgGF14-8	23.91
24 h	PgGF14-39	21.09	PgGF14-17	25.13	PgGF14-23	23.23	PgGF14-25	22.11	PgGF14-7	22.65	PgGF14-8	29.43
24 h	PgGF14-39	21.77	PgGF14-17	25.35	PgGF14-23	23.61	PgGF14-25	21.93	PgGF14-7	22.85	PgGF14-8	29.61
0 h	PgGF14-19	24.23	PgGF14-21	22.01	PgGF14-14	21.17	PgGF14-32	20.01	PgGF14-33	21.02	PgGF14-26	25.74
0 h	PgGF14-19	23.93	PgGF14-21	22.11	PgGF14-14	21.49	PgGF14-33	20.09	PgGF14-33	21.18	PgGF14-26	26.2
0 h	PgGF14-19	24.13	PgGF14-21	22.15	PgGF14-14	21.45	PgGF14-34	20.01	PgGF14-33	20.01	PgGF14-26	25.82
0 h	PgGF14-19	24.57	PgGF14-21	22.59	PgGF14-14	21.67	PgGF14-35	20.13	PgGF14-33	20.13	PgGF14-26	26.1
0 h	PgGF14-19	24.24	PgGF14-21	21.87	PgGF14-14	21.54	PgGF14-36	20.05	PgGF14-33	19.11	PgGF14-26	25.66
0 h	PgGF14-19	24.5	PgGF14-21	22.11	PgGF14-14	21.72	PgGF14-37	20.21	PgGF14-33	19.69	PgGF14-26	26.04
24 h	PgGF14-19	24.59	PgGF14-21	22.69	PgGF14-14	23.34	PgGF14-38	22.23	PgGF14-33	22.41	PgGF14-26	27.11
24 h	PgGF14-19	24.81	PgGF14-21	23.05	PgGF14-14	23.74	PgGF14-39	22.47	PgGF14-33	22.65	PgGF14-26	27.45
24 h	PgGF14-19	24.89	PgGF14-21	-	PgGF14-14	23.09	PgGF14-40	22.15	PgGF14-33	22.81	PgGF14-26	26.76
24 h	PgGF14-19	24.97	PgGF14-21		PgGF14-14	23.23	PgGF14-41	22.25	PgGF14-33	22.87	PgGF14-26	27.04
24 h	PgGF14-19	24.71	PgGF14-21	22.45	PgGF14-14	23.44	PgGF14-42	22.13	PgGF14-33	22.34	PgGF14-26	26.47
24 h	PgGF14-19	25.05	PgGF14-21	22.57	PgGF14-14	23.94	PgGF14-43	21.89	PgGF14-33	22.64	PgGF14-26	26.67
0 h	PgGF14-11	23.88	PgGF14-27	19.58	PgGF14-29	25.55	PgGF14-28	-	PgGF14-12	-
0 h	PgGF14-11	24.1	PgGF14-27	19.76	PgGF14-29	25.65	PgGF14-29		PgGF14-12
0 h	PgGF14-11	24.03	PgGF14-27	19.65	PgGF14-29	25.77	PgGF14-30	21.14	PgGF14-12	20.12
0 h	PgGF14-11	24.33	PgGF14-27	19.83	PgGF14-29	26.03	PgGF14-31	21.4	PgGF14-12	20.36
0 h	PgGF14-11	23.43	PgGF14-27	19.87	PgGF14-29	26.04	PgGF14-32	21.01	PgGF14-12	20.45
0 h	PgGF14-11	24.47	PgGF14-27	19.99	PgGF14-29	26.34	PgGF14-33	21.13	PgGF14-12	20.69
24 h	PgGF14-11	26.22	PgGF14-27	21.54	PgGF14-29	26.38	PgGF14-34	20.67	PgGF14-12	22.15
24 h	PgGF14-11	26.58	PgGF14-27	21.96	PgGF14-29	26.74	PgGF14-35	20.79	PgGF14-12	22.47
24 h	PgGF14-11	25.55	PgGF14-27	21.45	PgGF14-29	26.78	PgGF14-36	22.79	PgGF14-12	21.57
24 h	PgGF14-11	25.97	PgGF14-27	21.23	PgGF14-29	27.04	PgGF14-37	22.95	PgGF14-12	21.77
24 h	PgGF14-11	26.03	PgGF14-27	21.33	PgGF14-29	27.05	PgGF14-38	22.82	PgGF14-12	22.02
24 h	PgGF14-11	26.31	PgGF14-27	21.47	PgGF14-29	27.41	PgGF14-39	22.98	PgGF14-12	22.1
0 h	PgGF14-20	21.76	β-Actin	19.22	PgGF14-16	19.02	PgGF14-13	26.73
0 h	PgGF14-20	22.12	β-Actin	19.5	PgGF14-16	19.44	PgGF14-13	26.99
0 h	PgGF14-20	21.67	β-Actin	18.77	PgGF14-16	19.65	PgGF14-13	23.29
0 h	PgGF14-20	21.75	β-Actin	19.15	PgGF14-16	19.91	PgGF14-13	23.33
0 h	PgGF14-20	22.12	β-Actin	18.68	PgGF14-16	19.46	PgGF14-13	23.03
0 h	PgGF14-20	22.28	β-Actin	19.02	PgGF14-16	19.66	PgGF14-13	23.27
24 h	PgGF14-20	22.86	β-Actin	20.44	PgGF14-16	21.03	PgGF14-13	23.01
24 h	PgGF14-20	22.72	β-Actin	20.72	PgGF14-16	21.35	PgGF14-13	23.05
24 h	PgGF14-20	22.46	β-Actin	20.34	PgGF14-16	21.21	PgGF14-13	24.79
24 h	PgGF14-20	22.76	β-Actin	20.64	PgGF14-16	21.45	PgGF14-13	24.97
24 h	PgGF14-20	22.45	β-Actin	20.48	PgGF14-16	21.23	PgGF14-13	24.57
24 h	PgGF14-20	23.01	β-Actin	20.7	PgGF14-16	21.53	PgGF14-13	24.37

## Sheet: 36h
Raw data for qRT-PCR Cq values under 36 h stress
Stress time (35℃)	gene	Cq	gene	Cq	gene	Cq	gene	Cq	gene	Cq	gene	cq
0 h	β-Actin	20.52	β-Actin	18.3	β-Actin	19.23	β-Actin	20.72	PgGF14-29	26.5	β-Actin	18.8
0 h	β-Actin	20.01	β-Actin	18.12	β-Actin	19.54	β-Actin	20.83	PgGF14-29	25.23	β-Actin	18.43
0 h	β-Actin	20.84	β-Actin	18.41	β-Actin	19.7	β-Actin	29.21	PgGF14-29	25.12	β-Actin	18.5
0 h	β-Actin	19.83	β-Actin	18.21	β-Actin	19.22	β-Actin	21.2	PgGF14-29	25.5	β-Actin	18.24
0 h	β-Actin	20.01	β-Actin	18.28	β-Actin	18.99	β-Actin	21.26	PgGF14-29	24.99	β-Actin	18.66
0 h	β-Actin	19.97	β-Actin	18.25	β-Actin	18.61	β-Actin	21.07	PgGF14-29	25.4	β-Actin	18.38
36 h	β-Actin	20.13	β-Actin	18.45	β-Actin	24.34	β-Actin	20.06	PgGF14-29	26.79	β-Actin	19.24
36 h	β-Actin	19.97	β-Actin	18.22	β-Actin	19.18	β-Actin	19.8	PgGF14-29	26.12	β-Actin	19.18
36 h	β-Actin	19.76	β-Actin	18.69	β-Actin	19.36	β-Actin	19.77	PgGF14-29	26.26	β-Actin	19.37
36 h	β-Actin	19.87	β-Actin	18.66	β-Actin	18.72	β-Actin	20.18	PgGF14-29	26.09	β-Actin	19.15
36 h	β-Actin	19.88	β-Actin	18.55	β-Actin	18.89	β-Actin	20.06	PgGF14-29	25.98	β-Actin	18.97
36 h	β-Actin	19.59	β-Actin	18.6	β-Actin	19.14	β-Actin	19.94	PgGF14-29	26.04	β-Actin	19.03
0 h	PgGF14-11	23.92	PgGF14-12	20.2	PgGF14-1	20.9	PgGF14-31	19.91	PgGF14-41	20.99	PgGF14-8	20.62
0 h	PgGF14-11	23.85	PgGF14-12	20	PgGF14-1	21.41	PgGF14-31	-	PgGF14-41	21.03	PgGF14-8	20.58
0 h	PgGF14-11	23.81	PgGF14-12	-	PgGF14-1	21.19	PgGF14-31	19.96	PgGF14-41	20.97	PgGF14-8	20.46
0 h	PgGF14-11	23.92	PgGF14-12	19.96	PgGF14-1	20.74	PgGF14-31	20.26	PgGF14-41	21.96	PgGF14-8	20.68
0 h	PgGF14-11	23.89	PgGF14-12	19.87	PgGF14-1	20.96	PgGF14-31	20.08	PgGF14-41	21.24	PgGF14-8	20.53
0 h	PgGF14-11	23.95	PgGF14-12	20.03	PgGF14-1	20.7	PgGF14-31	20.73	PgGF14-41	21.36	PgGF14-8	20.71
36 h	PgGF14-11	24.74	PgGF14-12	21.11	PgGF14-1	21.53	PgGF14-31	22.23	PgGF14-41	22.48	PgGF14-8	22.87
36 h	PgGF14-11	24.65	PgGF14-12	21.11	PgGF14-1	21.34	PgGF14-31	22.15	PgGF14-41	22.12	PgGF14-8	22.85
36 h	PgGF14-11	24.58	PgGF14-12	21.98	PgGF14-1	21.18	PgGF14-31	22.11	PgGF14-41	22.15	PgGF14-8	-
36 h	PgGF14-11	24.52	PgGF14-12	21.79	PgGF14-1	21.01	PgGF14-31	22.46	PgGF14-41	22.38	PgGF14-8	22.69
36 h	PgGF14-11	24.6	PgGF14-12	21.55	PgGF14-1	21.11	PgGF14-31	22.31	PgGF14-41	22.41	PgGF14-8	22.5
36 h	PgGF14-11	24.4	PgGF14-12	21.14	PgGF14-1	20.78	PgGF14-31	22.07	PgGF14-41	22.05	PgGF14-8	22.91
0 h	PgGF14-10	17.19	PgGF14-17	23.65	PgGF14-25	18.54	PgGF14-42	20.41	PgGF14-32	20.52	PgGF14-33	19.51
0 h	PgGF14-10	17.26	PgGF14-17	23.67	PgGF14-25	18.73	PgGF14-42	20.41	PgGF14-32	20.09	PgGF14-33	19.56
0 h	PgGF14-10	17.32	PgGF14-17	23.63	PgGF14-25	18.5	PgGF14-42	20.35	PgGF14-32	19.72	PgGF14-33	19.46
0 h	PgGF14-10	17.4	PgGF14-17	23.51	PgGF14-25	19.43	PgGF14-42	21.15	PgGF14-32	20.34	PgGF14-33	19.84
0 h	PgGF14-10	17.34	PgGF14-17	23.63	PgGF14-25	19.26	PgGF14-42	21.6	PgGF14-32	19.83	PgGF14-33	19.56
0 h	PgGF14-10	17.37	PgGF14-17	23.59	PgGF14-25	19.37	PgGF14-42	21.51	PgGF14-32	20.14	PgGF14-33	19.66
36 h	PgGF14-10	17.36	PgGF14-17	21.4	PgGF14-25	21.46	PgGF14-42	20.72	PgGF14-32	32.49	PgGF14-33	22.94
36 h	PgGF14-10	17.33	PgGF14-17	21.66	PgGF14-25	21.27	PgGF14-42	20.88	PgGF14-32	30.26	PgGF14-33	22.67
36 h	PgGF14-10	17.25	PgGF14-17	21.63	PgGF14-25	21.08	PgGF14-42	20.67	PgGF14-32	31.78	PgGF14-33	22.69
36 h	PgGF14-10	17.27	PgGF14-17	21.56	PgGF14-25	20.68	PgGF14-42	20.8	PgGF14-32	31.63	PgGF14-33	22.91
36 h	PgGF14-10	17.25	PgGF14-17	21.67	PgGF14-25	20.66	PgGF14-42	21.14	PgGF14-32	31.17	PgGF14-33	22.83
36 h	PgGF14-10	17.24	PgGF14-17	21.52	PgGF14-25	20.96	PgGF14-42	21.06	PgGF14-32	31.38	PgGF14-33	22.82
0 h	PgGF14-27	21.22	PgGF14-16	18.81	PgGF14-6	25.01	PgGF14-40	21.14	PgGF14-28	22.25	PgGF14-7	19.28
0 h	PgGF14-27	20.95	PgGF14-16	18.54	PgGF14-6	24.95	PgGF14-40	21.52	PgGF14-28	21.23	PgGF14-7	19.15
0 h	PgGF14-27	21.12	PgGF14-16	18.71	PgGF14-6	-	PgGF14-40	21.62	PgGF14-28	21.24	PgGF14-7	19.24
0 h	PgGF14-27	21.06	PgGF14-16	18.66	PgGF14-6	25	PgGF14-40	22.38	PgGF14-28	21.46	PgGF14-7	19.12
0 h	PgGF14-27	20.72	PgGF14-16	18.99	PgGF14-6	24.47	PgGF14-40	22.16	PgGF14-28	21.71	PgGF14-7	19.26
0 h	PgGF14-27	20.94	PgGF14-16	18.87	PgGF14-6	24.61	PgGF14-40	22.11	PgGF14-28	21.73	PgGF14-7	19.52
36 h	PgGF14-27	21.48	PgGF14-16	19.41	PgGF14-6	25.83	PgGF14-40	21.49	PgGF14-28	26.1	PgGF14-7	21.76
36 h	PgGF14-27	21.2	PgGF14-16	19.44	PgGF14-6	25.87	PgGF14-40	21.18	PgGF14-28	22.68	PgGF14-7	21.67
36 h	PgGF14-27	21.17	PgGF14-16	19.59	PgGF14-6	25.23	PgGF14-40	21.08	PgGF14-28	22.52	PgGF14-7	21.72
36 h	PgGF14-27	21.2	PgGF14-16	19.59	PgGF14-6	25.08	PgGF14-40	21.73	PgGF14-28	22.41	PgGF14-7	21.73
36 h	PgGF14-27	21.21	PgGF14-16	19.65	PgGF14-6	25.58	PgGF14-40	21.48	PgGF14-28	22.44	PgGF14-7	21.6
36 h	PgGF14-27	21.14	PgGF14-16	19.59	PgGF14-6	25.59	PgGF14-40	21.96	PgGF14-28	23.36	PgGF14-7	21.38
0 h	PgGF14-19	23.85	PgGF14-5	22.05	PgGF14-9	21.43	PgGF14-26	24.18	PgGF14-14	23.12	PgGF14-4	24.74
0 h	PgGF14-19	23.5	PgGF14-5	21.91	PgGF14-9	20.96	PgGF14-26	-	PgGF14-14	22.72	PgGF14-4	24.96
0 h	PgGF14-19	23.67	PgGF14-5	21.94	PgGF14-9	20.9	PgGF14-26	24.23	PgGF14-14	22.61	PgGF14-4	24.53
0 h	PgGF14-19	23.65	PgGF14-5	21.97	PgGF14-9	21.09	PgGF14-26	24.52	PgGF14-14	22.66	PgGF14-4	24.61
0 h	PgGF14-19	23.78	PgGF14-5	21.9	PgGF14-9	21.02	PgGF14-26	24.45	PgGF14-14	22.67	PgGF14-4	24.66
0 h	PgGF14-19	24.31	PgGF14-5	-	PgGF14-9	20.81	PgGF14-26	24.35	PgGF14-14	22.56	PgGF14-4	24.77
36 h	PgGF14-19	23.9	PgGF14-5	21.07	PgGF14-9	22.05	PgGF14-26	24.68	PgGF14-14	24.47	PgGF14-4	25.44
36 h	PgGF14-19	23.76	PgGF14-5	21.21	PgGF14-9	21.92	PgGF14-26	24.4	PgGF14-14	24.34	PgGF14-4	25.41
36 h	PgGF14-19	23.9	PgGF14-5	21.13	PgGF14-9	22.27	PgGF14-26	24.41	PgGF14-14	24.18	PgGF14-4	25.69
36 h	PgGF14-19	23.92	PgGF14-5	21.06	PgGF14-9	22.08	PgGF14-26	24.96	PgGF14-14	24.1	PgGF14-4	25.8
36 h	PgGF14-19	23.77	PgGF14-5	21.19	PgGF14-9	22.31	PgGF14-26	24.77	PgGF14-14	24.42	PgGF14-4	25.65
36 h	PgGF14-19	25.59	PgGF14-5	21.39	PgGF14-9	22.43	PgGF14-26	24.84	PgGF14-14	23.3	PgGF14-4	25.72
0 h	PgGF14-22	27.12	PgGF14-3	20.63	PgGF14-24	21.02	PgGF14-30	19.7	PgGF14-23	22.53	PgGF14-15	23.54
0 h	PgGF14-22	27.31	PgGF14-3	20.22	PgGF14-24	21.12	PgGF14-30	19.77	PgGF14-23	22.57	PgGF14-15	23.71
0 h	PgGF14-22	27.06	PgGF14-3	20.44	PgGF14-24	21.25	PgGF14-30	19.83	PgGF14-23	22.18	PgGF14-15	23.66
0 h	PgGF14-22	27.58	PgGF14-3	20.7	PgGF14-24	21.04	PgGF14-30	20.54	PgGF14-23	22.27	PgGF14-15	23.92
0 h	PgGF14-22	27.45	PgGF14-3	20.62	PgGF14-24	21.34	PgGF14-30	20.83	PgGF14-23	22.46	PgGF14-15	23.23
0 h	PgGF14-22	27.43	PgGF14-3	20.47	PgGF14-24	21.38	PgGF14-30	20.55	PgGF14-23	22.64	PgGF14-15	23.46
36 h	PgGF14-22	27.52	PgGF14-3	20.98	PgGF14-24	21.67	PgGF14-30	20.85	PgGF14-23	22.85	PgGF14-15	24.57
36 h	PgGF14-22	27.35	PgGF14-3	20.75	PgGF14-24	21.57	PgGF14-30	20.67	PgGF14-23	22.69	PgGF14-15	24.25
36 h	PgGF14-22	27.45	PgGF14-3	20.8	PgGF14-24	21.5	PgGF14-30	20.69	PgGF14-23	22.51	PgGF14-15	24.14
36 h	PgGF14-22	27.2	PgGF14-3	21.1	PgGF14-24	21.93	PgGF14-30	21.09	PgGF14-23	22.5	PgGF14-15	24.1
36 h	PgGF14-22	27.26	PgGF14-3	20.76	PgGF14-24	21.83	PgGF14-30	21.55	PgGF14-23	22.67	PgGF14-15	24.68
36 h	PgGF14-22	27.29	PgGF14-3	20.94	PgGF14-24	21.49	PgGF14-30	21.24	PgGF14-23	23.06	PgGF14-15	24.4
0 h	PgGF14-21	18.44	PgGF14-2	18.25	PgGF14-34	19.46	PgGF14-35	19.55	PgGF14-39	21.41	PgGF14-18	21.95
0 h	PgGF14-21	18.43	PgGF14-2	18.37	PgGF14-34	19.2	PgGF14-35	19.63	PgGF14-39	21.43	PgGF14-18	21.49
0 h	PgGF14-21	18.17	PgGF14-2	18.39	PgGF14-34	19.27	PgGF14-35	19.3	PgGF14-39	21.1	PgGF14-18	21.64
0 h	PgGF14-21	18.13	PgGF14-2	18.15	PgGF14-34	19.13	PgGF14-35	19.72	PgGF14-39	21.24	PgGF14-18	21.77
0 h	PgGF14-21	18.2	PgGF14-2	18.48	PgGF14-34	19.38	PgGF14-35	19.79	PgGF14-39	21.75	PgGF14-18	21.83
0 h	PgGF14-21	18.08	PgGF14-2	18.04	PgGF14-34	19.21	PgGF14-35	20.12	PgGF14-39	21.27	PgGF14-18	21.81
36 h	PgGF14-21	18.11	PgGF14-2	18.53	PgGF14-34	20.83	PgGF14-35	20.85	PgGF14-39	22.84	PgGF14-18	22.88
36 h	PgGF14-21	18.31	PgGF14-2	18.2	PgGF14-34	20.38	PgGF14-35	21.02	PgGF14-39	23.31	PgGF14-18	22.75
36 h	PgGF14-21	18.34	PgGF14-2	18.61	PgGF14-34	20.76	PgGF14-35	21.36	PgGF14-39	22.96	PgGF14-18	22.6
36 h	PgGF14-21	17.5	PgGF14-2	18.39	PgGF14-34	20.14	PgGF14-35	21.27	PgGF14-39	22.86	PgGF14-18	22.94
36 h	PgGF14-21	18.33	PgGF14-2	18.7	PgGF14-34	20.97	PgGF14-35	21.14	PgGF14-39	23.22	PgGF14-18	22.71
36 h	PgGF14-21	18.01	PgGF14-2	18.7	PgGF14-34	20.9	PgGF14-35	21.36	PgGF14-39	23.35	PgGF14-18	22.65
0 h	PgGF14-20	20.85	PgGF14-13	21.31	PgGF14-36	20.17	PgGF14-37	23.83	β-Actin	18.8	PgGF14-38	22.55
0 h	PgGF14-20	20.96	PgGF14-13	21.64	PgGF14-36	20.41	PgGF14-37	23.67	β-Actin	18.43	PgGF14-38	22.53
0 h	PgGF14-20	20.77	PgGF14-13	21.33	PgGF14-36	20.06	PgGF14-37	24.05	β-Actin	18.5	PgGF14-38	23.13
0 h	PgGF14-20	21.11	PgGF14-13	21.49	PgGF14-36	20.07	PgGF14-37	24.68	β-Actin	18.24	PgGF14-38	22.69
0 h	PgGF14-20	21.04	PgGF14-13	21.55	PgGF14-36	20.39	PgGF14-37	23.82	β-Actin	18.66	PgGF14-38	23.44
0 h	PgGF14-20	21.12	PgGF14-13	21.25	PgGF14-36	20.14	PgGF14-37	25.31	β-Actin	18.38	PgGF14-38	-
36 h	PgGF14-20	-	PgGF14-13	23.18	PgGF14-36	21.31	PgGF14-37	22.68	β-Actin	19.24	PgGF14-38	23.36
36 h	PgGF14-20	22	PgGF14-13	23.42	PgGF14-36	21.25	PgGF14-37	34.89	β-Actin	19.18	PgGF14-38	23.23
36 h	PgGF14-20	21.8	PgGF14-13	23.26	PgGF14-36	20.91	PgGF14-37	23.59	β-Actin	19.37	PgGF14-38	23.24
36 h	PgGF14-20	21.71	PgGF14-13	23.41	PgGF14-36	21.13	PgGF14-37	23.72	β-Actin	19.15	PgGF14-38	22.8
36 h	PgGF14-20	21.7	PgGF14-13	23.45	PgGF14-36	20.88	PgGF14-37	23.64	β-Actin	18.97	PgGF14-38	22.97
36 h	PgGF14-20	21.65	PgGF14-13	23.53	PgGF14-36	20.74	PgGF14-37	23.81	β-Actin	19.03	PgGF14-38	22.96

## Sheet: Data Analysis
Statistical analysis for Cq values
	0 h			12 h					24 h					36 h
Gene	Mean	SD	N	Mean	SD	N	T-P value		Mean	SD	N	T-P value		Mean	SD	N	T-P value
PgGF14-1	1.012	0.169	6	0.638	0.172	6	0.00351102		0.83	0.023	6	0.0188388		0.817	0.147	6	0.0659218
PgGF14-2	1.004	0.103	6	0.372	0.023	6	4.3012e-08		0.671	0.092	6	0.0143184		1.026	0.145	6	0.797014
PgGF14-3	1.045	0.375	6	0.728	0.058	6	0.0683692		0.681	0.045	6	0.0498877		0.931	0.089	6	0.263072
PgGF14-4	1.04	0.297	6	0.368	0.032	6	0.00026028		0.332	0.132	6	0.00458177		0.23	0.021	6	2e-08
PgGF14-5	1.011	0.155	6	1.814	0.114	6	1.3345e-06		2.269	0.14	6	0.000229408		2.057	0.168	6	3.4361e-08
PgGF14-6	1.061	0.407	6	0.344	0.09	6	0.0017873		2.212	0.154	6	0.00026125		0.576	0.13	6	0.00063653
PgGF14-7	1.02	0.216	6	1.364	0.092	6	0.00489088		0.81	0.217	6	0.243333		0.701	0.048	6	0.00010837
PgGF14-8	1.002	0.066	6	1.45	0.236	6	0.00117061		1.665	0.306	6	0.0495487		0.455	0.114	6	1.8809e-06
PgGF14-9	1.006	0.122	6	1.927	0.349	6	0.00011684		1.272	0.121	6	0.0235583		0.415	0.055	6	2.2763e-06
PgGF14-10	1.008	0.138	6	2.362	0.252	6	4.16789e-07		1.506	0.141	6	0.00508336		0.813	0.028	6	1.83002e-05
PgGF14-11	1.008	0.13	6	1.126	0.158	6	0.18749		0.684	0.157	6	0.0361062		0.494	0.04	6	5.4299e-10
PgGF14-12	1.011	0.17	6	0.789	0.262	6	0.111866		1.095	0.134	6	0.506734		0.455	0.114	6	1.88089e-06
PgGF14-13	1.011	0.153	6	0.828	0.057	6	0.0206141		1.706	0.244	6	0.0267103		0.313	0.029	6	2.71059e-08
PgGF14-14	1.002	0.068	6	0.272	0.064	6	0.000184502		1.015	0.198	6	0.939476		0.186	0.066	6	6.96169e-08
PgGF14-15	1.038	0.291	6	0.318	0.185	6	0.000458735		0.462	0.074	6	0.00297685		0.793	0.131	6	0.028
PgGF14-16	1.003	0.082	6	0.65	0.067	6	9.82064e-06		1.137	0.079	6	0.365619		0.701	0.048	6	0.000108373
PgGF14-17	1.019	0.203	6	0.621	0.089	6	0.00132295		1.117	0.124	6	0.345581		4.958	0.363	6	1.31573e-10
PgGF14-18	1.036	0.265	6	0.697	0.117	6	0.0167104		4.635	1.101	6	0.00519731		0.866	0.088	6	0.0379546
PgGF14-19	1.003	0.081	6	3.759	0.104	6	1.99691e-13		1.905	0.163	6	0.00145176		0.676	0.222	6	0.0157364
PgGF14-20	1.013	0.196	6	2.923	0.567	6	1.47934e-05		1.669	0.107	6	0.00473984		0.448	0.047	6	2.37257e-07
PgGF14-21	1.004	0.102	6	3.016	0.121	6	2.68199e-11		2.023	0.278	6	0.00473021		0.898	0.226	6	0.316945
PgGF14-22	1.009	0.148	6	1.665	0.281	6	0.00049075		3.629	0.529	6	0.00120316		0.787	0.065	6	0.00612485
PgGF14-23	1.003	0.088	6	0.561	0.073	6	0.000924444		1.35	0.344	6	0.198327		0.396	0.056	6	8.8237e-07
PgGF14-24	1.004	0.103	6	0.825	0.097	6	0.0112534		1.103	0.051	6	0.102085		0.659	0.081	6	8.55755e-05
PgGF14-25	1.006	0.12	6	1.015	0.14	6	0.381791		2.066	1.061	6	0.163105		0.225	0.049	6	7.16053e-05
PgGF14-26	1.024	0.247	6	0.946	0.356	6	0.669662		1.998	0.484	6	0.0237636		0.373	0.06	6	1.09026e-07
PgGF14-27	1.001	0.059	6	0.838	0.116	6	0.0117318		0.865	0.127	6	0.202259		0.68	0.055	6	0.000150705
PgGF14-28	1.003	0.083	6	0.8	0.076	6	0.14842		1.259	0.08	6	0.0179919		0.204	0.043	6	3.37123e-07
PgGF14-29	1.01	0.149	6	0.897	0.154	6	0.701233		1.976	0.458	6	0.0295232		0.246	0.044	6	8.08573e-08
PgGF14-30	1.013	0.18	6	1.047	0.194	6	0.760199		1.215	0.156	6	0.167025		0.276	0.062	6	0.000282208
PgGF14-31	1.006	0.124	6	0.659	0.081	6	0.000184502		0.962	0.189	6	0.76281		0.112	0.011	6	5.70791e-07
PgGF14-32	1.009	0.146	6	0.676	0.074	6	0.742707		0.91	0.108	6	0.232777		1.108	0.076	6	3.34256e-07
PgGF14-33	1.028	0.271	6	0.801	0.203	6	0.13094		1.336	0.171	6	0.0275398		4.913	0.312	6	1.31573e-10
PgGF14-34	1.006	0.118	6	1.306	0.107	6	0.000924444		1.048	0.033	6	0.578155		0.355	0.087	6	1.25385e-07
PgGF14-35	1.011	0.176	6	1.102	0.305	6	0.351		1.054	0.188	6	0.675383		0.171	0.025	6	7.17686e-07
PgGF14-36	1.002	0.07	6	0.935	0.164	6	0.381791		1.889	0.458	6	0.0354563		0.517	0.081	6	4.22026e-06
PgGF14-37	1.009	0.152	6	0.898	0.083	6	0.14842		1.076	0.085	6	0.224417		0.689	0.439	6	0.139695
PgGF14-38	1.016	0.208	6	0.262	0.046	6	5.77133e-06		1.939	0.134	6	0.000266373		0.437	0.065	6	0.000677738
PgGF14-39	1.002	0.063	6	0.253	0.036	6	2.2452e-10		0.987	0.086	6	0.807062		0.145	0.023	6	6.5568e-08
PgGF14-40	1.006	0.112	6	0.963	0.24	6	0.701233		1.135	0.093	6	0.0718905		0.61	0.137	6	0.0172939
PgGF14-41	1.001	0.054	6	0.935	0.474	6	0.742707		0.661	0.122	6	0.000360804		0.212	0.026	6	9.79641e-09
PgGF14-42	1.002	0.068	6	0.376	0.12	6	5.91329e-07		1.326	0.399	6	0.263043		0.486	0.062	6	0.00582671
